# Supplementary material
Source: publisher site journal article supplement (https://www.spandidos-publications.com/469/downloadSupplementary)
Supplement: Supplementary file 1 [file downloadSupplementary]

## Sheet: QuantitatedProteinsSummary
Table SI. Quantified proteins in the thorcic spinal cord between I/R group and sham group injury in rats.
Accession	Name	R1					R2					R3					Average	SD
		Total	%Cov	Peptides(95%)	H:L	PVal H:L	Total	%Cov	Peptides(95%)	H:L	PVal H:L	Total	%Cov	Peptides(95%)	H:L	PVal H:L
tr|A0A096MKB4|A0A096MKB4_RAT	FRY microtubule-binding protein (Fragment) OS=Rattus norvegicus GN=Fry PE=1 SV=1	2.41	12.12	2	0.20794	0.4689	6.43	17.12	6	0.0379059	0.421634	3.03	16.02	2	0.0665857	0	0.104144	0.0910266
tr|A0A0G2K0S1|A0A0G2K0S1_RAT	Calcium-binding and coiled-coil domain-containing protein 1 OS=Rattus norvegicus GN=Calcoco1 PE=1 SV=1	5.65	34.41	4	0.263328	0.223604	4.39	30.49	2	0.107813	0.399261	6.46	31.33	3	0.112309	0.388731	0.16115	0.0885174
tr|A0A0H2UHM7|A0A0H2UHM7_RAT	Tubulin alpha chain OS=Rattus norvegicus GN=LOC100909441 PE=3 SV=1	52.81	62.28	27	0.415521	0	58.08	62.28	31	0.0315764	0	57.47	68.08	32	0.0571496	0	0.168082	0.214669
tr|F1LPG9|F1LPG9_RAT	WASH complex subunit 2C OS=Rattus norvegicus GN=Washc2c PE=1 SV=2	15.2	20.48	8	0.131628	0.0367872	12.06	19.73	7	0.26638	0.282018	15.68	28.77	8	0.187091	0.0600739	0.195033	0.0677258
sp|Q68FW7|SYTM_RAT	Threonine--tRNA ligase, mitochondrial OS=Rattus norvegicus GN=Tars2 PE=2 SV=1	2.74	22.41	2	0.298299	0.299377	6.71	26	3	0.0985109	0.386285	5.33	24.9	3	0.211177	0.253046	0.202662	0.100166
tr|A0A0A0MXX5|A0A0A0MXX5_RAT	3-hydroxybutyrate dehydrogenase type 2 OS=Rattus norvegicus GN=Bdh2 PE=1 SV=1	8.11	29.02	4	0.575801	0.355471	6.68	32.55	4	0.227418	0.479697	6.81	32.55	4	0.391096	0.302866	0.398105	0.174297
tr|D4A3T0|D4A3T0_RAT	SOS Ras/Rac guanine nucleotide exchange factor 1 OS=Rattus norvegicus GN=Sos1 PE=1 SV=2	5.33	27.67	4	0.697948	0.360674	6.95	26.08	4	0.245386	0.327419	11.13	29.95	7	0.424997	0.391589	0.45611	0.22788
tr|G3V6A8|G3V6A8_RAT	Golgi autoantigen, golgin subfamily b, macrogolgin 1, isoform CRA_c OS=Rattus norvegicus GN=Golgb1 PE=1 SV=1	2.32	28.02	2	0.345452	0.0677692	1.73	27.64	5	0.367652	0	7.69	26.92	7	0.669472	0.174464	0.460859	0.181005
tr|D3ZXY2|D3ZXY2_RAT	PDZ domain containing 8 (Predicted) OS=Rattus norvegicus GN=Pdzd8 PE=1 SV=1	5.92	19.27	4	0.0840999	0.206838	4.62	26.13	3	0.473434	0.181145	4.88	23	4	0.844558	0.440555	0.467364	0.380265
sp|P40112|PSB3_RAT	Proteasome subunit beta type-3 OS=Rattus norvegicus GN=Psmb3 PE=1 SV=1	5.17	43.41	3	0.413072	0.347687	7.29	38.54	4	0.509721	0.200874	8.13	35.12	4	0.505909	0.340135	0.476234	0.0547332
tr|Q6AY48|Q6AY48_RAT	Poly(rC)-binding protein 3 OS=Rattus norvegicus GN=Pcbp3 PE=1 SV=1	16.06	45.45	8	0.725789	0.246787	12.05	39.81	7	0.21815	0	12.92	42.32	8	0.524495	0.527583	0.489478	0.255625
tr|A0A0G2K8E7|A0A0G2K8E7_RAT	Lysophospholipase D GDPD1 OS=Rattus norvegicus GN=Gdpd1 PE=1 SV=1	6.3	29.52	3	0.548735	0.0744784	8.35	28.57	4	0.513071	0.0725707	5.69	42.86	3	0.489739	0.0519466	0.517182	0.0297117
sp|O35180|SH3G3_RAT	Endophilin-A3 OS=Rattus norvegicus GN=Sh3gl3 PE=1 SV=2	6.81	26.51	4	0.480147	0.421888	8.68	36.31	4	0.671565	0.479291	8.68	31.7	5	0.43718	0.178754	0.529631	0.124782
sp|F1LRS8|CD2AP_RAT	CD2-associated protein OS=Rattus norvegicus GN=Cd2ap PE=1 SV=2	7.01	27.94	4	0.502206	0.160028	4.56	29.36	2	0.615973	0.403164	4.8	31.87	3	0.480104	0.428975	0.532761	0.0729059
tr|F2Z3T9|F2Z3T9_RAT	U2 snRNP auxiliary factor large subunit OS=Rattus norvegicus GN=U2af2 PE=1 SV=2	5.18	21.23	3	0.536294	0.359014	5	15.5	3	0.434449	0.413108	6.06	16.14	3	0.650632	0.572003	0.540458	0.108152
sp|P02454|CO1A1_RAT	Collagen alpha-1(I) chain OS=Rattus norvegicus GN=Col1a1 PE=1 SV=5	17.55	39.09	9	0.444574	0.143952	13.74	31.31	7	0.784554	0.672003	12.37	29.32	7	0.420218	0.19433	0.549782	0.203683
tr|G3V9P7|G3V9P7_RAT	Huntingtin OS=Rattus norvegicus GN=Htt PE=1 SV=1	9.61	16.09	6	0.6843	0.0677575	6.06	15.06	5	0.149142	0	7.39	16.83	6	0.820724	0.54382	0.551389	0.354972
sp|Q9Z269|VAPB_RAT	Vesicle-associated membrane protein-associated protein B OS=Rattus norvegicus GN=Vapb PE=1 SV=3	17.23	44.44	10	0.689279	0.460054	15.93	45.27	11	0.533801	0.127127	18.1	55.97	10	0.43695	0.149561	0.553343	0.127295
tr|A0A0G2K943|A0A0G2K943_RAT	AP-2 complex subunit alpha OS=Rattus norvegicus GN=Ap2a2 PE=1 SV=1	62.28	45.36	30	0.467735	0	64.22	46.89	31	0.291188	0	66.49	56.61	33	0.921151	0.580697	0.560025	0.324964
tr|M0R5H1|M0R5H1_RAT	Enhancer trap locus 4 OS=Rattus norvegicus GN=Etl4 PE=1 SV=2	5.85	24.82	3	0.319012	0.0420729	11.58	24.72	7	0.704695	0.255462	14.71	32.23	8	0.69008	0.302672	0.571262	0.218577
tr|A0A0G2KB85|A0A0G2KB85_RAT	Serine protease inhibitor OS=Rattus norvegicus GN=LOC299282 PE=1 SV=1	13.63	34.88	7	0.360342	0.1117	13.32	41.86	7	0.82124	0.639932	11.44	40.7	6	0.541737	0.403025	0.57444	0.232183
tr|A0A0G2K988|A0A0G2K988_RAT	Dishevelled-associated activator of morphogenesis 2 OS=Rattus norvegicus GN=Daam2 PE=1 SV=1	9.64	27.84	5	0.512575	0.268359	4.12	24.8	2	0.55701	0.490026	3.96	29.81	3	0.663149	0.846803	0.577578	0.0773653
tr|A0A0G2JVP5|A0A0G2JVP5_RAT	Poly(A)-binding protein-interacting protein 1 OS=Rattus norvegicus GN=Paip1 PE=1 SV=1	7.72	26.75	4	0.70953	0.246505	4.66	22	3	0.534708	0.512974	8.03	23.25	4	0.505348	0.342874	0.583195	0.110389
tr|F1M4I1|F1M4I1_RAT	Catenin alpha 3 OS=Rattus norvegicus GN=Ctnna3 PE=1 SV=3	8.08	37.06	4	0.444292	0.350568	6.54	34.86	3	0.722902	0.529773	10.69	36.51	5	0.586637	0.274267	0.58461	0.139316
tr|D3ZGN0|D3ZGN0_RAT	TBC1 domain family, member 4 OS=Rattus norvegicus GN=Tbc1d4 PE=1 SV=3	6.02	18.64	3	0.591909	0.316809	4.06	25.97	2	0.468152	0	6.04	21.39	3	0.694444	0	0.584835	0.113312
tr|B2RZ77|B2RZ77_RAT	Dermatopontin OS=Rattus norvegicus GN=Dpt PE=1 SV=1	4.53	37.13	3	0.612276	0.0307679	6	41.58	3	0.620518	0.139137	5.11	22.77	3	0.524725	0	0.58584	0.0530871
sp|Q6MGB5|DHB8_RAT	Estradiol 17-beta-dehydrogenase 8 OS=Rattus norvegicus GN=Hsd17b8 PE=1 SV=1	4.97	41.7	3	0.890938	0.842235	9.12	57.92	5	0.321481	0	3.74	22.39	2	0.564637	0.224888	0.592352	0.285739
tr|D3ZUL3|D3ZUL3_RAT	Collagen type VI alpha 1 chain OS=Rattus norvegicus GN=Col6a1 PE=1 SV=1	12.38	23.12	7	0.625367	0.177687	7.14	20.39	4	0.646391	0.605445	7.36	21.07	4	0.507936	0.0266685	0.593231	0.0746123
tr|A0A0G2JT30|A0A0G2JT30_RAT	Methionine adenosyltransferase 2 subunit beta OS=Rattus norvegicus GN=Mat2b PE=1 SV=1	4.66	52.32	3	0.79619	0.313358	6.04	34.98	3	0.727197	0.390252	4.03	33.44	2	0.265814	0	0.5964	0.288367
tr|F1LRL4|F1LRL4_RAT	Similar to TBC1 domain family, member 8; BUB2-like protein 1; vascular Rab-GAP/TBC-containing (Predicted), isoform CRA_a OS=Rattus norvegicus GN=Tbc1d9b PE=1 SV=2	7.03	22.11	6	0.724386	0.40864	6.39	22.9	3	0.663769	0.273753	7.06	17.51	4	0.402437	0.371497	0.596864	0.171085
tr|B4F774|B4F774_RAT	Ganglioside-induced differentiation-associated protein 1-like 1 OS=Rattus norvegicus GN=Gdap1l1 PE=2 SV=1	8.24	33.33	4	0.622893	0.247742	12.12	36.89	6	0.652467	0.0869224	10.09	34.7	5	0.51761	0.109848	0.597657	0.0708817
tr|D4AE88|D4AE88_RAT	Family with sequence similarity 120B OS=Rattus norvegicus GN=Fam120b PE=1 SV=1	3.23	25.73	2	0.388313	0	8.63	21.27	4	0.771064	0.0354489	7.29	16.82	5	0.646471	0.0991322	0.601949	0.195221
tr|Q7TP42|Q7TP42_RAT	Ab2-292 OS=Rattus norvegicus GN=Sec62 PE=1 SV=1	3.2	31.24	3	0.667569	0.302357	4.22	22.64	3	0.67123	0.255927	2.87	11.24	2	0.491541	0.354191	0.610113	0.102703
tr|A0A0G2K0Y6|A0A0G2K0Y6_RAT	Transcriptional coactivator YAP1 OS=Rattus norvegicus GN=Yap1 PE=1 SV=1	4.02	19.39	2	0.689725	0.341774	4.05	14.25	2	0.64766	0.580315	2.81	28.5	3	0.501768	0.407064	0.613051	0.0986424
tr|F1MAA1|F1MAA1_RAT	Ubiquitin-specific peptidase 47 OS=Rattus norvegicus GN=Usp47 PE=1 SV=1	8.32	15.79	6	0.507463	0.134276	7.68	23.17	4	0.645161	0.103269	10.5	20	6	0.691005	0.26633	0.614543	0.095525
sp|Q920P6|ADA_RAT	Adenosine deaminase OS=Rattus norvegicus GN=Ada PE=1 SV=3	6.73	32.67	4	0.594422	0.232983	5.48	31.82	3	0.817062	0.60435	5	18.75	3	0.441213	0.388879	0.617566	0.18899
tr|D3ZDE4|D3ZDE4_RAT	Deoxyguanosine kinase OS=Rattus norvegicus GN=Dguok PE=1 SV=1	3.15	50.72	2	0.63761	0.316748	2.67	46.4	2	0.53415	0.643984	2.52	49.28	2	0.686955	0.647016	0.619572	0.0779831
sp|P97519|HMGCL_RAT	Hydroxymethylglutaryl-CoA lyase, mitochondrial OS=Rattus norvegicus GN=Hmgcl PE=2 SV=1	6.12	34.77	3	0.73643	0.396358	6.31	42.15	3	0.498726	0.537397	6.25	28.31	4	0.627978	0.809666	0.621045	0.119003
sp|P50411|IPP2_RAT	Protein phosphatase inhibitor 2 OS=Rattus norvegicus GN=Ppp1r2 PE=1 SV=2	7.48	45.85	5	0.472207	0.139676	6.05	43.41	3	0.706448	0.420363	3.1	26.34	2	0.714831	0.428383	0.631162	0.137723
tr|B2GV72|B2GV72_RAT	Carbonyl reductase 3 OS=Rattus norvegicus GN=Cbr3 PE=1 SV=1	4.36	38.99	2	0.667934	0	5.08	29.96	3	0.72031	0.677724	4.6	29.6	3	0.511008	0.769615	0.633084	0.108917
tr|M0R735|M0R735_RAT	Heterogeneous nuclear ribonucleoprotein Q OS=Rattus norvegicus GN=Syncrip PE=1 SV=2	7.01	34.16	3	0.494188	0.205237	6.45	33.99	3	0.657285	0	12.14	41.1	6	0.754161	0.233516	0.635211	0.131384
tr|D3ZES7|D3ZES7_RAT	Plexin A4 OS=Rattus norvegicus GN=Plxna4 PE=4 SV=1	6.74	15	4	0.675072	0.921779	10.18	22.56	6	0.667781	0.292779	7.32	18.7	5	0.586518	0.342043	0.643124	0.0491571
tr|D4A927|D4A927_RAT	Transforming, acidic coiled-coil-containing protein 1 OS=Rattus norvegicus GN=Tacc1 PE=1 SV=1	6.94	26.04	4	0.627972	0.207365	6.03	22.28	4	0.738937	0.417004	6.91	20.21	4	0.577345	0.547574	0.648085	0.0826523
tr|D3ZDU2|D3ZDU2_RAT	Regulatory-associated protein of MTOR, complex 1 OS=Rattus norvegicus GN=Rptor PE=1 SV=2	6	15.88	3	0.804265	0.675758	7.9	16.25	4	0.834018	0.406648	5.6	19.33	3	0.312165	0.0395289	0.650149	0.293081
sp|Q62829|PAK3_RAT	Serine/threonine-protein kinase PAK 3 OS=Rattus norvegicus GN=Pak3 PE=1 SV=1	20.1	38.24	9	0.713808	0.278652	30.63	38.79	16	0.620432	0.32069	29.11	44.67	15	0.617184	0.0502342	0.650475	0.0548721
tr|D3ZK56|D3ZK56_RAT	RAP2C, member of RAS oncogene family OS=Rattus norvegicus GN=Rap2c PE=1 SV=2	4.03	33.33	2	0.746263	0	4	17.49	2	0.644674	0	3.28	20.22	2	0.580736	0	0.657224	0.0834742
tr|F1LNH3|F1LNH3_RAT	Collagen type VI alpha 2 chain OS=Rattus norvegicus GN=Col6a2 PE=1 SV=2	5.36	29.11	3	0.700637	0.38485	5.68	26.1	4	0.656996	0.171629	4.61	27.46	3	0.615353	0.403381	0.657662	0.0426461
tr|A0A0G2JUS7|A0A0G2JUS7_RAT	Transmembrane protein 11, mitochondrial OS=Rattus norvegicus GN=Tmem11 PE=1 SV=1	2.87	18.75	2	0.692079	0.224808	3.17	31.82	2	0.674291	0.352858	3.89	18.75	3	0.607144	0.31482	0.657838	0.0447942
sp|Q5RJY4|DRS7B_RAT	Dehydrogenase/reductase SDR family member 7B OS=Rattus norvegicus GN=Dhrs7b PE=1 SV=1	3.35	29.85	3	0.966835	0.81974	8.19	31.38	4	0.478555	0.201564	6.52	31.69	3	0.532485	0.362623	0.659292	0.267702
sp|Q5PQN7|LZIC_RAT	Protein LZIC OS=Rattus norvegicus GN=Lzic PE=2 SV=1	6.3	32.63	3	0.676942	0.426872	7.15	41.58	5	0.671273	0.157698	5.71	40	3	0.634385	0.461258	0.660867	0.0231084
sp|P0DMW1|HS71B_RAT	Heat shock 70 kDa protein 1B OS=Rattus norvegicus GN=Hspa1b PE=2 SV=1	17.26	44.77	8	0.566892	0.21657	21.53	43.53	10	0.544034	0.13223	21.7	46.18	11	0.879387	0.690458	0.663437	0.187367
tr|A0A0G2K5E8|A0A0G2K5E8_RAT	Collagen, type I, alpha 2 OS=Rattus norvegicus GN=NEWGENE_621351 PE=1 SV=1	7.14	36.42	4	0.754865	0.546771	6.11	43.25	3	0.615095	0.0208125	3.62	38.38	3	0.623048	0.737424	0.664336	0.0785014
tr|D3ZUC9|D3ZUC9_RAT	Oxidative-stress responsive 1 (Predicted) OS=Rattus norvegicus GN=Oxsr1 PE=1 SV=1	15.37	25.24	8	0.575751	0.303157	11.21	31.88	6	0.539973	0.428789	13.07	20.3	8	0.878829	0.877177	0.664851	0.186172
tr|F1M6V8|F1M6V8_RAT	Striatin 4 OS=Rattus norvegicus GN=Strn4 PE=1 SV=1	3.71	18.84	3	0.867812	0.722187	2.61	12.52	2	0.261147	0	4.04	20.82	2	0.868862	0.390122	0.66594	0.350562
tr|F1LMT8|F1LMT8_RAT	Rab3 GTPase-activating protein non-catalytic subunit OS=Rattus norvegicus GN=Rab3gap2 PE=1 SV=3	11.84	18.21	6	0.934355	0.589245	10.89	20.12	7	0.525112	0.110686	6.73	14.17	4	0.54065	0.107187	0.666706	0.231922
tr|F1M6A8|F1M6A8_RAT	RAC-gamma serine/threonine-protein kinase OS=Rattus norvegicus GN=Akt3 PE=3 SV=3	2.82	44.69	2	0.523881	0	5.79	32.3	4	0.594738	0.338843	5.34	41.59	3	0.885414	0.635888	0.668011	0.191581
tr|F1LRY5|F1LRY5_RAT	RCG45398 OS=Rattus norvegicus GN=Sardh PE=1 SV=2	6.7	19.48	4	0.533808	0.32073	8.36	17.52	4	0.60661	0.399858	6.52	14.36	3	0.863671	0.589917	0.66803	0.173296
tr|M0RC17|M0RC17_RAT	Cell adhesion molecule L1-like OS=Rattus norvegicus GN=Chl1 PE=1 SV=2	8.92	23.72	4	0.557726	0.201665	10.11	19.26	6	0.684963	0.19534	18.22	29.09	9	0.781171	0.243633	0.67462	0.112081
tr|F1LPC6|F1LPC6_RAT	Carboxypeptidase D OS=Rattus norvegicus GN=Cpd PE=1 SV=2	15.35	21.7	10	0.821894	0.415641	11.42	23.08	7	0.494452	0.157923	10.15	19.59	6	0.708603	0.257074	0.674983	0.16629
sp|Q562C6|LZTL1_RAT	Leucine zipper transcription factor-like protein 1 OS=Rattus norvegicus GN=Lztfl1 PE=2 SV=1	10.17	39.46	5	0.464276	0.143012	13.4	46.15	7	0.903651	0.828703	11.63	45.82	6	0.65953	0.361695	0.675819	0.22014
tr|D3ZH40|D3ZH40_RAT	OTU deubiquitinase 7B OS=Rattus norvegicus GN=Otud7b PE=1 SV=1	8.79	36.27	5	0.900778	0.313865	16.23	36.39	8	0.557022	0.249633	16.9	30.44	9	0.576353	0.331596	0.678051	0.193129
tr|D3Z890|D3Z890_RAT	Sn1-specific diacylglycerol lipase beta OS=Rattus norvegicus GN=Daglb PE=1 SV=3	9.65	23.77	6	0.838749	0.45741	6.4	14.35	4	0.737853	0.457264	5.21	18.98	4	0.459071	0.121993	0.678558	0.196662
sp|P63170|DYL1_RAT	Dynein light chain 1, cytoplasmic OS=Rattus norvegicus GN=Dynll1 PE=1 SV=1	9.87	65.17	7	0.911834	0.535624	7.93	65.17	4	0.66318	0.251278	9.3	65.17	5	0.46365	0.483101	0.679555	0.22454
sp|Q9JKS6|PCLO_RAT	Protein piccolo OS=Rattus norvegicus GN=Pclo PE=1 SV=1	8.28	19.27	9	0.384349	0.252869	18.42	22.14	15	0.799306	0.178629	8.85	19.67	8	0.859743	0.239867	0.681133	0.258793
sp|Q498R3|DJC10_RAT	DnaJ homolog subfamily C member 10 OS=Rattus norvegicus GN=Dnajc10 PE=2 SV=2	4.92	17.53	3	0.763986	0.238303	4.92	19.55	2	0.707484	0	3.13	23.58	2	0.577306	0	0.682926	0.0957323
tr|A0JN30|A0JN30_RAT	Canopy 2 homolog (Zebrafish) OS=Rattus norvegicus GN=Cnpy2 PE=1 SV=1	6.61	44.51	4	0.704558	0.382199	4.01	34.62	2	0.655778	0.459845	2.8	32.97	2	0.691141	0.704585	0.683826	0.0251992
tr|D3ZYD7|D3ZYD7_RAT	Coiled coil domain-containing 88A OS=Rattus norvegicus GN=Ccdc88a PE=1 SV=3	6.49	33.4	4	0.76571	0.348004	3.4	28.11	3	0.514874	0.534536	4.67	29.7	2	0.777193	0.345997	0.685926	0.148246
tr|A0A0G2K561|A0A0G2K561_RAT	Protein tyrosine phosphatase, receptor type, G OS=Rattus norvegicus GN=Ptprg PE=1 SV=1	2.87	14	2	0.583529	0.315344	3.83	11.91	3	0.613771	0	5.11	11.76	3	0.863235	0.703961	0.686845	0.153505
tr|A0A0G2K9M4|A0A0G2K9M4_RAT	WD repeat and FYVE domain-containing 3 OS=Rattus norvegicus GN=Wdfy3 PE=1 SV=1	7.57	20.76	6	0.775154	0.602978	5.93	16.77	7	0.604047	0.456565	7.37	19.34	6	0.702754	0.294513	0.693985	0.08589
sp|Q6AYT0|QOR_RAT	Quinone oxidoreductase OS=Rattus norvegicus GN=Cryz PE=2 SV=1	7.27	27.36	4	0.808131	0.483471	4.35	20.06	2	0.451988	0.0938456	12.92	50.15	7	0.827893	0.375811	0.696004	0.211555
tr|A0A0G2JZ60|A0A0G2JZ60_RAT	Fibronectin type III and SPRY domain-containing 1-like OS=Rattus norvegicus GN=Fsd1l PE=4 SV=1	3.88	34.45	3	0.906259	0.788663	6.48	34.65	5	0.404021	0.635053	9.61	31.69	5	0.781665	0.180039	0.697315	0.261528
tr|G3V6H1|G3V6H1_RAT	Galactosylceramidase OS=Rattus norvegicus GN=Galc PE=1 SV=3	6.56	20.61	3	0.838501	0.723826	7.84	16.96	4	0.68776	0.533304	4.39	14.62	3	0.579143	0.341126	0.701801	0.130248
tr|A0A0G2K2M9|A0A0G2K2M9_RAT	Serine/arginine repetitive matrix 2 OS=Rattus norvegicus GN=Srrm2 PE=1 SV=1	7.03	32.47	5	0.773455	0.223248	4.07	33.43	4	0.717221	0.648391	3.79	33.39	4	0.626155	0.301308	0.70561	0.0743331
tr|A0A0G2JUF2|A0A0G2JUF2_RAT	Sorting nexin family member 30 OS=Rattus norvegicus GN=Snx30 PE=1 SV=1	3.64	34.04	3	0.699317	0.33735	3	29.57	3	0.850949	0.544667	2.65	33.62	2	0.582549	0.504107	0.710938	0.134577
tr|G3V9H0|G3V9H0_RAT	Ras GTPase-activating protein 1 OS=Rattus norvegicus GN=Rasa1 PE=1 SV=2	4	13.15	2	0.837013	0.350386	6.85	21.29	4	0.651464	0.528721	3.65	14.76	2	0.646733	0.335546	0.711737	0.108518
tr|D3ZRE3|D3ZRE3_RAT	Casein kinase I isoform alpha OS=Rattus norvegicus GN=Csnk1a1 PE=1 SV=1	4.8	38.08	3	0.816802	0.528826	1.58	27.12	2	0.547265	0.144927	6.03	43.56	3	0.771148	0.257881	0.711738	0.144256
tr|D4A383|D4A383_RAT	Protein tweety homolog OS=Rattus norvegicus GN=Ttyh3 PE=1 SV=1	4.39	17.75	2	0.547712	0.338089	4.01	16.41	2	0.866039	0.740004	4.91	14.89	3	0.723829	0.356747	0.712526	0.159464
tr|G3V6C3|G3V6C3_RAT	Polysaccharide biosynthesis domain-containing 1 OS=Rattus norvegicus GN=Pbdc1 PE=1 SV=1	2.9	42.93	2	0.478188	0.512152	7.85	50	4	0.83725	0.458112	6.52	41.41	3	0.828353	0.419482	0.714597	0.204785
tr|D3ZZP2|D3ZZP2_RAT	RAB39, member RAS oncogene family (Predicted) OS=Rattus norvegicus GN=Rab39a PE=4 SV=1	6.16	32.26	3	0.85088	0.258804	7.16	31.8	4	0.781071	0.698441	6.83	31.34	4	0.515337	0	0.715762	0.177049
sp|B2GV38|UBL4A_RAT	Ubiquitin-like protein 4A OS=Rattus norvegicus GN=Ubl4a PE=2 SV=1	4.66	60.51	4	0.540147	0.0526324	3.71	66.88	2	0.958073	0.8839	5.94	60.51	3	0.649479	0.50583	0.7159	0.216736
tr|F1LX70|F1LX70_RAT	3'-phosphoadenosine 5'-phosphosulfate synthase 1 OS=Rattus norvegicus GN=Papss1 PE=1 SV=3	11.74	35.28	7	0.93394	0.6853	13.89	38.73	7	0.648588	0.246005	13.59	39.76	7	0.571758	0.102664	0.718095	0.190833
tr|D3ZPC4|D3ZPC4_RAT	Neural cell adhesion molecule L1 OS=Rattus norvegicus GN=L1cam PE=1 SV=2	13.34	24.3	8	0.507194	0.0855615	16.96	21.67	10	0.724636	0.292592	18.45	26.61	9	0.940447	0.51167	0.724093	0.216627
sp|Q5U2U7|MCES_RAT	mRNA cap guanine-N7 methyltransferase OS=Rattus norvegicus GN=Rnmt PE=1 SV=1	8.35	36.01	4	0.976986	0.846177	10.36	36.44	5	0.636886	0.381108	10.52	27.55	6	0.563008	0.351055	0.725627	0.220796
tr|D3ZTB4|D3ZTB4_RAT	VPS11 CORVET/HOPS core subunit OS=Rattus norvegicus GN=Vps11 PE=1 SV=1	8.5	25.28	5	0.904509	0.189067	8.96	27.68	5	0.799297	0.227807	9.57	30.07	5	0.474948	0.499038	0.726251	0.223903
tr|Q5RJK6|Q5RJK6_RAT	Inositol polyphosphate-1-phosphatase OS=Rattus norvegicus GN=Inpp1 PE=1 SV=1	11.28	30.56	8	0.677973	0.16498	9.85	34.34	7	0.772944	0.0298744	14.96	41.41	7	0.743715	0.0523741	0.731544	0.0486414
tr|M0RBN6|M0RBN6_RAT	Neurexin-1-beta (Fragment) OS=Rattus norvegicus GN=Nrxn1 PE=4 SV=3	13	30.59	9	0.722778	0.0813294	18.62	31.78	9	0.788564	0.296054	16.86	23.21	9	0.693762	0.176745	0.735035	0.0485753
tr|D3ZD23|D3ZD23_RAT	ATP-binding cassette subfamily E member 1 OS=Rattus norvegicus GN=Abce1 PE=1 SV=1	11.25	29.22	6	0.748537	0.433892	15.59	31.39	7	0.846116	0.325393	14.08	31.39	7	0.611882	0.18054	0.735511	0.117659
tr|D4A510|D4A510_RAT	SWI/SNF-related, matrix-associated, actin-dependent regulator of chromatin, subfamily c, member 2 OS=Rattus norvegicus GN=Smarcc2 PE=1 SV=3	4.99	26.17	3	0.889957	0.913353	7.58	34.63	4	0.35692	0.275462	4.5	17.62	2	0.96876	0.966769	0.738546	0.332838
tr|M0R9Q1|M0R9Q1_RAT	RCG48334, isoform CRA_e OS=Rattus norvegicus GN=Rbm14 PE=1 SV=1	6.79	22.72	4	0.853903	0.548098	8.45	24.07	4	0.775412	0.650863	7.84	27.35	4	0.586471	0.515263	0.738595	0.137465
tr|D4ABM3|D4ABM3_RAT	Dishevelled associated activator of morphogenesis 1 (Predicted) OS=Rattus norvegicus GN=Daam1 PE=1 SV=1	4.25	26.03	2	0.854214	0.527624	4.24	32.33	2	0.574123	0.301181	4.91	26.96	2	0.788305	0.637335	0.738881	0.146441
tr|F1LSQ0|F1LSQ0_RAT	FAS-associated factor 1 OS=Rattus norvegicus GN=Faf1 PE=1 SV=3	7.7	23.49	4	0.583336	0.510464	5.11	33.93	3	0.747656	0.418942	6	24.31	3	0.899431	0.325388	0.743474	0.158089
tr|F1M1B3|F1M1B3_RAT	Similar to Hypothetical protein MGC31278 OS=Rattus norvegicus GN=Washc5 PE=1 SV=2	17.73	36.07	9	0.754244	0.128091	11.29	31.75	6	0.768624	0.458636	10.94	27.35	7	0.707928	0.0484771	0.743599	0.031717
tr|D3ZV52|D3ZV52_RAT	Intersectin-1 OS=Rattus norvegicus GN=Itsn1 PE=1 SV=3	4.24	25.1	4	0.703245	0.601905	17.16	29.31	11	0.562305	0.363731	15.68	37.01	8	0.968331	0.959144	0.744627	0.206152
tr|F1LYZ8|F1LYZ8_RAT	Protein phosphatase 1, regulatory subunit 21 OS=Rattus norvegicus GN=Ppp1r21 PE=1 SV=3	6.68	28.21	4	0.882463	0.302899	9.28	24.62	5	0.682596	0.396966	6.79	25.26	3	0.66918	0.425204	0.744746	0.119455
sp|P84083|ARF5_RAT	ADP-ribosylation factor 5 OS=Rattus norvegicus GN=Arf5 PE=1 SV=2	15.45	58.89	7	0.493563	0.306991	23.44	79.44	12	0.873599	0.577338	16.87	58.89	8	0.875577	0.601124	0.74758	0.219987
tr|M0R7S5|M0R7S5_RAT	Perilipin 4 OS=Rattus norvegicus GN=Plin4 PE=4 SV=2	6	33.98	3	0.750441	0.0760494	7.96	57.56	4	0.579499	0.207398	4	46.02	2	0.916724	0.564544	0.748888	0.168618
sp|Q496Z0|ELP2_RAT	Elongator complex protein 2 OS=Rattus norvegicus GN=Elp2 PE=2 SV=1	8.06	12.67	4	0.620219	0.174344	6.02	22.41	3	0.839088	0.378116	8.12	22.66	4	0.799805	0.158914	0.753037	0.116689
tr|D4A3Z3|D4A3Z3_RAT	Similar to CG9339-PA (Predicted) OS=Rattus norvegicus GN=Tbc1d24 PE=1 SV=1	7.58	20.5	5	0.883477	0.454551	6.37	23.74	3	0.751028	0.296625	4.08	21.76	2	0.635484	0.126428	0.756663	0.124092
tr|A0A0G2K5D7|A0A0G2K5D7_RAT	Sperm antigen with calponin homology and coiled-coil domains 1 OS=Rattus norvegicus GN=Specc1 PE=1 SV=1	5.61	28.1	5	0.678208	0.12877	14.46	33.22	8	0.927989	0.700585	11.74	34.78	8	0.669058	0.322676	0.758418	0.146924
tr|D3ZI42|D3ZI42_RAT	Leucine-rich repeat and sterile alpha motif-containing 1 OS=Rattus norvegicus GN=Lrsam1 PE=1 SV=3	4.58	30.91	2	0.781672	0.244182	7.07	29.26	3	0.695265	0.256152	4.63	26.51	2	0.800515	0.357473	0.759151	0.0561229
tr|A0A0G2K1U9|A0A0G2K1U9_RAT	Immunity-related GTPase Q OS=Rattus norvegicus GN=Irgq PE=1 SV=1	14.46	27.66	7	0.857807	0.525614	17.43	25.77	10	0.623425	0.343141	16.14	34.02	8	0.797422	0.474997	0.759551	0.121694
sp|Q02293|FNTB_RAT	Protein farnesyltransferase subunit beta OS=Rattus norvegicus GN=Fntb PE=1 SV=1	5.03	13.96	3	0.961296	0.682107	4.01	12.59	2	0.676773	0.154739	6.21	14.65	3	0.646238	0.282855	0.761436	0.173756
tr|Q5XIM0|Q5XIM0_RAT	BCS1 homolog, ubiquinol-cytochrome c reductase complex chaperone OS=Rattus norvegicus GN=Bcs1l PE=1 SV=1	7.83	29.43	4	0.778284	0.593323	8.71	38.28	5	0.707098	0.154755	12.02	26.32	6	0.799097	0.692349	0.761493	0.048243
tr|F1MAA5|F1MAA5_RAT	RAN GTPase-activating protein 1 OS=Rattus norvegicus GN=Rangap1 PE=1 SV=2	12.38	22.01	7	0.82975	0.331513	13.84	28.5	8	0.714498	0.205827	10	31.23	5	0.748919	0.0664927	0.764389	0.0591632
sp|P97612|FAAH1_RAT	Fatty-acid amide hydrolase 1 OS=Rattus norvegicus GN=Faah PE=1 SV=1	4.02	18.13	2	1.01469	0	4.01	26.94	2	0.695055	0.432162	4.05	14.68	2	0.589911	0.183157	0.766553	0.221232
sp|Q6MG08|ABCF1_RAT	ATP-binding cassette sub-family F member 1 OS=Rattus norvegicus GN=Abcf1 PE=1 SV=1	5.01	28.72	3	1.02019	0.971934	3.09	25.03	2	0.589863	0.637481	2.86	29.8	2	0.6918	0.524089	0.767284	0.224875
sp|F1MA98|TPR_RAT	Nucleoprotein TPR OS=Rattus norvegicus GN=Tpr PE=1 SV=1	15.37	29.75	8	0.728052	0.271771	12.95	29.15	7	0.885654	0.690126	22.66	28.22	14	0.688822	0.16901	0.76751	0.104179
tr|A0A0G2K079|A0A0G2K079_RAT	Breast carcinoma-amplified sequence 1 homolog OS=Rattus norvegicus GN=Bcas1 PE=1 SV=1	35.3	56.77	18	1.00198	0	33.79	51.59	18	0.709607	0	32.53	55.33	16	0.593125	0	0.768239	0.210641
sp|P06238|A2MG_RAT	Alpha-2-macroglobulin OS=Rattus norvegicus GN=A2m PE=2 SV=2	6.7	15.69	4	0.801004	0.158904	16.71	16.24	9	0.684223	0.187316	23.94	23.57	13	0.822931	0.293332	0.769386	0.0745638
sp|Q8VHI8|SEC20_RAT	Vesicle transport protein SEC20 OS=Rattus norvegicus GN=Bnip1 PE=2 SV=1	4.39	37.28	3	0.852208	0.765416	4.03	27.63	2	0.782877	0.596834	4.04	41.67	3	0.674199	0	0.769761	0.0897267
tr|D3ZXK4|D3ZXK4_RAT	Abhydrolase domain-containing 11 OS=Rattus norvegicus GN=Abhd11 PE=1 SV=1	6.22	26.38	4	0.854419	0.130858	4.17	22.15	3	0.878683	0.136536	6	21.82	3	0.57711	0.077607	0.770071	0.167549
tr|A0A1B0GWV6|A0A1B0GWV6_RAT	Aldehyde oxidase 3 OS=Rattus norvegicus GN=Aox3 PE=1 SV=1	4.95	15.2	3	0.759398	0.40026	4.04	13.94	2	0.608011	0	4.69	13.58	4	0.944275	0.923923	0.770561	0.16841
tr|D4A644|D4A644_RAT	MAP7 domain-containing 1 OS=Rattus norvegicus GN=Map7d1 PE=1 SV=1	15.84	40.64	8	0.801547	0.362652	14.47	41.62	7	0.748991	0.118988	14.32	41.86	7	0.767163	0.351315	0.772567	0.0266911
sp|Q63151|ACSL3_RAT	Long-chain-fatty-acid--CoA ligase 3 OS=Rattus norvegicus GN=Acsl3 PE=1 SV=1	16.9	30.83	8	0.762582	0.363177	22.4	37.08	10	0.867649	0.0681551	23.63	30.97	12	0.688933	0.0502808	0.773055	0.089817
tr|M0RDK9|M0RDK9_RAT	Acyl-CoA dehydrogenase family, member 8 OS=Rattus norvegicus GN=Acad8 PE=1 SV=2	3.41	31.87	2	0.653086	0.329533	6.35	32.85	4	0.653695	0.131013	4.15	32.36	2	1.02581	0.983812	0.777531	0.215018
sp|P29117|PPIF_RAT	Peptidyl-prolyl cis-trans isomerase F, mitochondrial OS=Rattus norvegicus GN=Ppif PE=1 SV=2	7.1	73.3	3	0.851548	0.39798	6.15	61.65	4	0.751264	0.405461	4.26	43.69	2	0.731723	0.209432	0.778178	0.0642869
tr|B1WBX6|B1WBX6_RAT	Small ArfGAP2 OS=Rattus norvegicus GN=Smap2 PE=1 SV=1	7.68	20.56	4	0.687406	0.281841	3.04	10.98	2	0.652466	0.699472	6.83	27.8	4	0.997313	0.986252	0.779062	0.189817
tr|D3ZUY0|D3ZUY0_RAT	Retinol dehydrogenase 14 (all-trans/9-cis/11-cis) OS=Rattus norvegicus GN=Rdh14 PE=1 SV=1	10.14	40.72	5	0.628194	0.280902	12.13	48.2	6	0.963442	0.827968	11.78	51.8	6	0.748581	0.264474	0.780072	0.169828
sp|Q6P7P5|BZW1_RAT	Basic leucine zipper and W2 domain-containing protein 1 OS=Rattus norvegicus GN=Bzw1 PE=1 SV=1	9.21	30.79	4	0.707602	0.138427	10.95	29.12	6	0.814849	0.0589503	13.04	36.52	6	0.818809	0.109677	0.78042	0.0630933
tr|D3ZCI0|D3ZCI0_RAT	Glycerol kinase OS=Rattus norvegicus GN=Gk PE=1 SV=2	15.24	29.96	8	0.809169	0.513848	14.05	25.38	8	0.729844	0.445037	18.83	31.49	10	0.805925	0.587068	0.781646	0.0448914
tr|A0A0G2K8K0|A0A0G2K8K0_RAT	Splicing factor proline and glutamine rich OS=Rattus norvegicus GN=Sfpq PE=1 SV=1	11.7	29.89	7	0.671857	0.664434	11.01	37.21	6	0.796938	0.402811	16.13	29.02	8	0.880993	0.373679	0.783263	0.105236
tr|D3ZR52|D3ZR52_RAT	Lysophosphatidylcholine acyltransferase 4 OS=Rattus norvegicus GN=Lpcat4 PE=4 SV=3	4.26	17.43	2	0.60345	0.322956	6.01	14.94	3	0.906511	0.694776	10	25.1	5	0.84151	0.166978	0.783823	0.159553
sp|Q5FVK6|C2D1B_RAT	Coiled-coil and C2 domain-containing protein 1B OS=Rattus norvegicus GN=Cc2d1b PE=1 SV=2	16	33.76	9	0.763565	0.394298	18.04	34	9	0.906281	0.741353	11.66	24.35	5	0.683727	0.325593	0.784524	0.112748
tr|Q3B8P4|Q3B8P4_RAT	Decapping enzyme, scavenger OS=Rattus norvegicus GN=Dcps PE=1 SV=1	6	18.81	3	0.754591	0.0811333	2.79	18.81	2	0.804152	0.572703	2.85	15.82	2	0.795262	0.273532	0.784669	0.0264242
sp|Q5QJC9|BAG5_RAT	BAG family molecular chaperone regulator 5 OS=Rattus norvegicus GN=Bag5 PE=1 SV=1	16.24	40.27	9	0.902844	0.739549	13.96	44.07	7	0.69573	0.235008	14.24	35.35	7	0.757253	0.0512719	0.785276	0.106363
sp|Q07310|NRX3A_RAT	Neurexin-3 OS=Rattus norvegicus GN=Nrxn3 PE=1 SV=1	9.8	18.44	5	0.975149	0.8717	8.3	22.62	5	0.620452	0.330997	7.72	24.97	4	0.761399	0.727019	0.785667	0.17859
tr|A0A0G2K890|A0A0G2K890_RAT	Ezrin OS=Rattus norvegicus GN=Ezr PE=1 SV=1	24.76	62.39	11	0.626968	0.185653	26.33	56.24	13	0.970557	0.870466	25.2	49.23	12	0.759763	0.285635	0.785763	0.173264
tr|G3V8F5|G3V8F5_RAT	Mitochondrial import receptor subunit TOM40 homolog OS=Rattus norvegicus GN=Tomm40 PE=1 SV=1	7.26	21.88	4	0.689009	0.33001	6	26.32	3	0.679409	0.383999	7.48	17.73	4	0.99334	0.985202	0.787253	0.178541
tr|Q3B8N9|Q3B8N9_RAT	Biphenyl hydrolase-like OS=Rattus norvegicus GN=Bphl PE=1 SV=1	7.28	51.2	5	0.81026	0.562858	7.7	46.74	4	0.725251	0.515861	7.65	45.02	4	0.827596	0.421762	0.787702	0.0547746
tr|B2RYI2|B2RYI2_RAT	Signal recognition particle subunit SRP68 OS=Rattus norvegicus GN=Srp68 PE=1 SV=1	18.92	36.96	9	0.789864	0.06324	20.7	38.72	11	0.873127	0.381903	19.32	42.88	10	0.701825	0.125502	0.788272	0.0856621
tr|B2GV57|B2GV57_RAT	Cysteinyl-tRNA synthetase 2, mitochondrial OS=Rattus norvegicus GN=Cars2 PE=1 SV=1	7.31	40.73	4	0.581954	0.400812	10.05	19.45	5	0.999387	0.995337	7.74	25.45	4	0.784088	0.559905	0.788476	0.208751
tr|Q5RK05|Q5RK05_RAT	Matrix Gla protein OS=Rattus norvegicus GN=Mgp PE=1 SV=1	3.07	23.3	2	0.649318	0.237793	4	24.27	2	0.823906	0	3.85	23.3	2	0.899981	0.675843	0.791069	0.128517
sp|O35244|PRDX6_RAT	Peroxiredoxin-6 OS=Rattus norvegicus GN=Prdx6 PE=1 SV=3	18.68	58.93	10	0.769	0.218875	25.2	61.61	13	0.859942	0.364593	22.83	70.98	11	0.746167	0.336255	0.791703	0.0601894
tr|D4A994|D4A994_RAT	ER membrane protein complex subunit 1 OS=Rattus norvegicus GN=Emc1 PE=1 SV=1	6.38	21.65	3	1.02799	0.862544	12.78	17.93	7	0.747399	0.0667754	14.33	25.38	8	0.602231	0.209607	0.79254	0.216439
sp|Q6AYG5|ECHD1_RAT	Ethylmalonyl-CoA decarboxylase OS=Rattus norvegicus GN=Echdc1 PE=1 SV=1	16.11	53.18	8	0.752745	0.291635	17.19	53.85	8	0.902434	0.513953	19.34	53.18	10	0.723069	0.197048	0.792749	0.0961415
tr|F1M0Z3|F1M0Z3_RAT	Copine 4 OS=Rattus norvegicus GN=Cpne4 PE=4 SV=2	8.04	21.69	4	0.729929	0	6.08	18.34	3	0.829938	0	6.16	17.99	3	0.820943	0	0.793603	0.0553265
sp|P02688|MBP_RAT	Myelin basic protein OS=Rattus norvegicus GN=Mbp PE=1 SV=3	37.16	88.21	19	0.81114	0.0366762	41.2	94.87	23	0.808064	0.0338414	43.89	99.49	23	0.764187	0.10735	0.794464	0.0262656
sp|O08836|IGBP1_RAT	Immunoglobulin-binding protein 1 OS=Rattus norvegicus GN=Igbp1 PE=2 SV=2	4.1	32.06	2	0.852545	0.749218	7.27	32.35	4	0.787001	0.102725	7.65	26.47	4	0.7445	0.0916352	0.794682	0.0544308
sp|Q561R9|LACB2_RAT	Endoribonuclease LACTB2 OS=Rattus norvegicus GN=Lactb2 PE=2 SV=1	5.14	31.25	4	0.922689	0.657498	7.87	26.39	4	0.626012	0.134946	2.13	25.69	3	0.837105	0.391333	0.795269	0.152699
tr|Q499R6|Q499R6_RAT	Similar to Zinc finger, FYVE domain containing 19 OS=Rattus norvegicus GN=Zfyve19 PE=1 SV=1	6.61	32.9	3	0.95859	0.893406	3.09	42.49	3	0.641215	0.689946	3.29	20.98	2	0.78766	0.496572	0.795821	0.158844
sp|Q9WVS2|OSGEP_RAT	Probable tRNA N6-adenosine threonylcarbamoyltransferase OS=Rattus norvegicus GN=Osgep PE=2 SV=2	5.32	31.64	3	1.01109	0	10.25	30.75	6	0.59062	0.152981	5.88	28.66	4	0.788692	0.769207	0.796801	0.210353
tr|A0A0G2JZY3|A0A0G2JZY3_RAT	RALBP1-associated Eps domain-containing 1 OS=Rattus norvegicus GN=Reps1 PE=1 SV=1	7.4	23.79	4	0.912377	0.469368	4.54	20.3	3	0.936088	0.665955	8.01	16.4	4	0.545251	0.0483521	0.797905	0.219126
tr|D3ZFJ6|D3ZFJ6_RAT	Lactamase, beta OS=Rattus norvegicus GN=Lactb PE=1 SV=1	3.51	29.82	2	0.867805	0	7.79	29.64	4	0.643712	0.336971	5.94	26.55	3	0.883807	0.738402	0.798441	0.134239
sp|P32232|CBS_RAT	Cystathionine beta-synthase OS=Rattus norvegicus GN=Cbs PE=1 SV=3	13.53	34.4	8	0.541877	0.140694	16.6	38.15	9	0.901094	0.567322	12.82	26.92	7	0.953378	0.884166	0.798783	0.224018
sp|Q9JHZ4|GRAP1_RAT	GRIP1-associated protein 1 OS=Rattus norvegicus GN=Gripap1 PE=1 SV=1	29.53	42.29	13	0.765828	0.0988241	30.91	51.02	14	0.829302	0.245264	41.04	57.95	21	0.803755	0.337862	0.799628	0.0319374
sp|P18297|SPRE_RAT	Sepiapterin reductase OS=Rattus norvegicus GN=Spr PE=1 SV=1	14.1	46.56	7	0.816372	0.337592	13.54	47.71	7	0.828725	0.0791974	12.25	39.69	6	0.757995	0.124852	0.801031	0.0377783
tr|D4A022|D4A022_RAT	GTPase-activating protein and VPS9 domains 1 OS=Rattus norvegicus GN=Gapvd1 PE=1 SV=3	8.64	22.64	5	0.849165	0.680512	18.62	25.4	10	0.703412	0.257815	9.21	15.97	5	0.85355	0.569303	0.802042	0.0854446
sp|Q5FVH2|PLD3_RAT	Phospholipase D3 OS=Rattus norvegicus GN=Pld3 PE=2 SV=1	4	7.787	2	0.95546	0.72618	6	18.65	3	0.747462	0.240931	3.66	4.508	2	0.704388	0.175092	0.802437	0.134261
tr|D4A3X6|D4A3X6_RAT	Phospholipid-transporting ATPase OS=Rattus norvegicus GN=Atp8a2 PE=1 SV=3	13.08	22.16	7	0.909083	0.698702	10.35	13.52	6	0.817006	0.0375819	11.38	15.91	6	0.683284	0.121663	0.803124	0.113538
tr|M0RCY2|M0RCY2_RAT	Similar to ribosomal protein S13 OS=Rattus norvegicus GN=LOC683961 PE=3 SV=1	9.57	45.81	5	0.659909	0.329049	13.33	46.45	6	0.813666	0.55834	12.12	49.68	7	0.939826	0.768973	0.804467	0.140185
sp|Q80W83|2A5B_RAT	Serine/threonine-protein phosphatase 2A 56 kDa regulatory subunit beta isoform OS=Rattus norvegicus GN=Ppp2r5b PE=2 SV=1	12.45	30.38	6	0.673025	0.482634	12.14	31.59	6	0.915628	0.799367	14.31	31.79	7	0.824836	0.216068	0.804496	0.122574
tr|A0A0H2UHV9|A0A0H2UHV9_RAT	Coatomer subunit gamma OS=Rattus norvegicus GN=Copg2 PE=1 SV=1	10.62	26.21	6	0.935051	0.782123	6.81	27.36	5	0.845093	0.738523	9.47	20.69	5	0.635095	0.597548	0.80508	0.153929
tr|Q52KJ9|Q52KJ9_RAT	Thioredoxin domain containing 1 OS=Rattus norvegicus GN=Tmx1 PE=1 SV=1	8.16	24.82	4	0.775697	0.473338	11.68	31.65	6	0.795585	0.456887	11.4	31.65	6	0.844562	0.495206	0.805281	0.0354413
tr|Q6IN14|Q6IN14_RAT	Tetraspanin OS=Rattus norvegicus GN=Cd82 PE=1 SV=1	5.58	16.92	4	0.856606	0.201814	7.18	12.41	4	0.825495	0.597795	6.11	12.41	3	0.736779	0.322358	0.806293	0.0621782
tr|D3ZDR2|D3ZDR2_RAT	Charged multivesicular body protein 6 OS=Rattus norvegicus GN=Chmp6 PE=1 SV=1	4.16	26.5	2	0.681553	0.635839	4.01	22	2	0.835522	0.557206	4.04	23.5	2	0.905153	0.536567	0.807409	0.11442
tr|F8WFH6|F8WFH6_RAT	Protein FAM131B OS=Rattus norvegicus GN=Fam131b PE=1 SV=1	4.35	25.28	3	0.913402	0	6.03	20.56	3	0.729708	0.235941	2.48	23.89	2	0.782919	0.252899	0.808676	0.0945172
tr|B5DFE0|B5DFE0_RAT	Membrane palmitoylated protein 6 OS=Rattus norvegicus GN=Mpp6 PE=1 SV=1	14.13	44.26	7	0.84285	0.348902	23.77	51.3	13	0.774625	0.315821	16.09	39.26	8	0.81013	0.393285	0.809201	0.0341224
tr|F1LML7|F1LML7_RAT	Huntingtin-interacting protein 1-related OS=Rattus norvegicus GN=Hip1r PE=1 SV=1	27.84	40.97	15	0.850783	0.146087	26.14	42.56	14	0.801398	0.506561	36.2	44.71	18	0.778334	0.287635	0.810172	0.0370124
tr|F7EZZ0|F7EZZ0_RAT	Death-associated protein 3 OS=Rattus norvegicus GN=Dap3 PE=1 SV=1	7	26.77	4	0.673327	0.187321	8.47	38.38	5	0.945773	0.791908	9.78	38.89	5	0.812004	0.366296	0.810368	0.136231
sp|P07727|GLRA1_RAT	Glycine receptor subunit alpha-1 OS=Rattus norvegicus GN=Glra1 PE=1 SV=4	6.3	20.13	4	0.721465	0.664351	6.11	16.41	3	0.997988	0.986764	6.82	22.98	4	0.713004	0.316573	0.810819	0.162148
tr|D4A7I6|D4A7I6_RAT	Similar to CG13957-PA OS=Rattus norvegicus GN=Washc4 PE=1 SV=1	3.6	24.21	2	0.818276	0.401796	7.93	23.19	4	0.972442	0.968651	11.57	33.08	7	0.641819	0.239533	0.810846	0.165437
tr|G3V7B5|G3V7B5_RAT	Phosphoribosyl pyrophosphate synthase-associated protein 1 OS=Rattus norvegicus GN=Prpsap1 PE=1 SV=1	14.01	37.92	7	0.726641	0.704032	16.11	52.99	8	0.803396	0.340083	12.36	53.25	7	0.903696	0.615071	0.811244	0.0887879
sp|Q6AXS5|PAIRB_RAT	Plasminogen activator inhibitor 1 RNA-binding protein OS=Rattus norvegicus GN=Serbp1 PE=1 SV=2	4.11	38.82	2	0.679249	0	4.07	33.66	2	0.834461	0.713999	4.09	37.84	2	0.921526	0.853882	0.811745	0.122725
tr|F1M978|F1M978_RAT	Inositol-1-monophosphatase OS=Rattus norvegicus GN=Impa1 PE=1 SV=1	22.79	60.65	11	0.907967	0.532035	20.78	56.68	11	0.798179	0.53482	24.05	64.62	14	0.731277	0.266424	0.812474	0.089208
tr|A0A0G2JU77|A0A0G2JU77_RAT	Eukaryotic translation initiation factor 3 subunit K OS=Rattus norvegicus GN=Eif3k PE=1 SV=1	3.79	26.98	2	0.705471	0.414676	5.64	26.98	3	0.794027	0.457462	6.43	30.23	4	0.938869	0.757669	0.812789	0.117825
tr|A0A0H2UHH3|A0A0H2UHH3_RAT	ATP-binding cassette sub-family B member 8, mitochondrial OS=Rattus norvegicus GN=Abcb8 PE=1 SV=1	5.04	30.42	3	0.740652	0.510032	4.05	22.68	2	0.879023	0.661893	4.43	23.38	2	0.81914	0.374905	0.812938	0.0693936
sp|Q8VIJ5|OGA_RAT	Protein O-GlcNAcase OS=Rattus norvegicus GN=Mgea5 PE=1 SV=1	7.05	31	4	0.915964	0.469078	6.6	21.51	4	0.651809	0.103185	9.18	25.55	6	0.872058	0.473231	0.813277	0.141549
sp|Q5BJT7|CCD93_RAT	Coiled-coil domain-containing protein 93 OS=Rattus norvegicus GN=Ccdc93 PE=1 SV=1	9.47	24.01	5	0.923337	0.499547	11.22	33.7	6	0.850885	0.228851	14.64	28.46	8	0.669668	0.19381	0.81463	0.130663
sp|P08033|CXB1_RAT	Gap junction beta-1 protein OS=Rattus norvegicus GN=Gjb1 PE=1 SV=1	4.11	17.31	2	0.920189	0.325559	5.35	20.85	3	0.841622	0.497972	6.51	23.67	3	0.686641	0.019992	0.816151	0.118839
sp|Q6P0K8|PLAK_RAT	Junction plakoglobin OS=Rattus norvegicus GN=Jup PE=1 SV=1	23.92	35.97	12	0.712652	0.35821	25.51	39.73	12	0.940569	0.716918	32.1	37.72	16	0.800026	0.31126	0.817749	0.114987
tr|A0A0G2K464|A0A0G2K464_RAT	Secretory carrier-associated membrane protein OS=Rattus norvegicus GN=Scamp5 PE=1 SV=1	3.11	8.511	2	1.07001	0.919357	2.98	8.511	2	0.709417	0.579583	4	8.511	2	0.675514	0.526818	0.818313	0.218633
sp|P05982|NQO1_RAT	NAD(P)H dehydrogenase [quinone] 1 OS=Rattus norvegicus GN=Nqo1 PE=1 SV=4	19.63	53.28	11	0.889788	0.479389	22.44	44.16	11	0.779022	0.273341	19.56	50.73	11	0.787612	0.400436	0.818808	0.0616208
sp|O35964|SH3G1_RAT	Endophilin-A2 OS=Rattus norvegicus GN=Sh3gl1 PE=1 SV=1	13.21	47.83	6	0.78771	0.817618	16.88	47.83	8	0.902615	0.423436	16.75	46.2	9	0.766896	0.786369	0.819074	0.0730936
tr|Q4FZU0|Q4FZU0_RAT	Acid phosphatase 6, lysophosphatidic OS=Rattus norvegicus GN=Acp6 PE=1 SV=1	11.56	37.29	7	0.973232	0.878376	6.34	23.97	3	0.784593	0.416092	8.88	37.29	4	0.69952	0.136285	0.819115	0.140084
tr|D4AAM0|D4AAM0_RAT	Transportin 3 OS=Rattus norvegicus GN=Tnpo3 PE=1 SV=2	10.15	22.43	5	0.792888	0.186877	10.21	15.28	5	0.976504	0.861405	8.38	15.28	5	0.694968	0.62203	0.821453	0.142925
tr|Q6AY99|Q6AY99_RAT	Aldo-keto reductase family 1 member B10 OS=Rattus norvegicus GN=Akr1b10 PE=1 SV=1	19.24	48.1	9	0.987888	0.840102	21.32	52.53	11	0.853174	0.0131667	19.36	56.65	10	0.62351	6.22947e-05	0.821524	0.184239
sp|Q64611|CSAD_RAT	Cysteine sulfinic acid decarboxylase OS=Rattus norvegicus GN=Csad PE=1 SV=1	12.56	36.51	6	0.86038	0.43461	10.61	30.63	7	0.757609	0.466365	10.38	25.35	6	0.849531	0.571391	0.822507	0.0564642
tr|D4A5B3|D4A5B3_RAT	C2 calcium-dependent domain-containing 5 OS=Rattus norvegicus GN=C2cd5 PE=1 SV=1	3.63	15.72	2	0.983739	0.971028	6.38	17.84	4	0.875534	0.68136	4.24	23.24	3	0.608457	0.325272	0.822577	0.193165
sp|P26431|SL9A1_RAT	Sodium/hydrogen exchanger 1 OS=Rattus norvegicus GN=Slc9a1 PE=1 SV=2	7.03	18.54	4	0.823067	0.412532	5.51	16.59	3	1.01194	0.92617	3.39	19.15	2	0.635908	0	0.823639	0.188017
sp|Q63616|VP33B_RAT	Vacuolar protein sorting-associated protein 33B OS=Rattus norvegicus GN=Vps33b PE=2 SV=1	7.98	29.98	4	0.736397	0.170708	4.41	23.99	2	0.991137	0.956291	4.26	28.2	2	0.752195	0.258091	0.826576	0.142733
tr|D4A5X7|D4A5X7_RAT	Ganglioside-induced differentiation-associated-protein 1 OS=Rattus norvegicus GN=Gdap1 PE=4 SV=1	14.22	37.71	7	0.844813	0.352636	17.05	37.99	9	0.865649	0.480765	15.16	35.2	7	0.769701	0.31573	0.826721	0.0504676
sp|Q03114|CDK5_RAT	Cyclin-dependent-like kinase 5 OS=Rattus norvegicus GN=Cdk5 PE=1 SV=1	13.59	45.55	7	0.677231	0.12231	12.53	61.99	7	0.887082	0.543236	11.9	49.32	8	0.916099	0.367692	0.826804	0.130344
tr|F7F1Y3|F7F1Y3_RAT	Vacuolar protein sorting-associated protein 4A OS=Rattus norvegicus GN=Vps4a PE=1 SV=1	6.56	32.75	3	0.839989	0.348237	6.03	25.29	4	0.993025	0.985259	5.04	49.02	3	0.649097	0.153598	0.82737	0.172311
tr|F1LMT5|F1LMT5_RAT	PEX5-related protein OS=Rattus norvegicus GN=Pex5l PE=1 SV=2	13.33	27.08	7	0.604738	0.46635	15	45.02	8	1.00637	0.978902	12.8	34.88	6	0.873725	0.590804	0.828278	0.204636
tr|A0A0G2K7F7|A0A0G2K7F7_RAT	Tropomyosin alpha-1 chain OS=Rattus norvegicus GN=Tpm1 PE=1 SV=1	39.63	65.68	19	0.712316	0.0832197	36.96	73.6	19	0.89093	0.804255	41.34	74.26	20	0.882104	0.507618	0.82845	0.100671
tr|D4A857|D4A857_RAT	Importin 9 OS=Rattus norvegicus GN=Ipo9 PE=1 SV=2	7.43	14.22	4	0.793427	0.120003	9.04	16.23	7	0.992052	0.927651	11.63	15.27	7	0.708027	0.543152	0.831168	0.145725
tr|Q4QQS7|Q4QQS7_RAT	Uridine monophosphate synthetase OS=Rattus norvegicus GN=Umps PE=1 SV=1	9.78	23.49	5	0.826488	0.495866	10.65	36.59	6	0.788957	0.487128	13.99	33.68	7	0.880445	0.51301	0.831963	0.0459893
sp|Q4AEF8|COPG1_RAT	Coatomer subunit gamma-1 OS=Rattus norvegicus GN=Copg1 PE=2 SV=1	10.12	23.57	5	0.834114	0.501626	7.39	20.59	5	0.801561	0.374206	8.17	20.59	5	0.860714	0.884067	0.83213	0.0296263
tr|F1MAH8|F1MAH8_RAT	CAP-Gly domain-containing linker protein 1 OS=Rattus norvegicus GN=Clip1 PE=1 SV=3	7.9	30.71	5	0.845458	0.753039	10.72	37.68	6	0.883261	0.43699	11.15	29.95	5	0.769445	0.209496	0.832721	0.0579673
tr|A0A0G2JTD7|A0A0G2JTD7_RAT	Cytoplasmic linker-associated protein 1 OS=Rattus norvegicus GN=Clasp1 PE=1 SV=1	31.83	47.94	18	0.870638	0.524397	37.36	33.47	20	0.840901	0.312315	42.79	46.16	21	0.786699	0.169715	0.832746	0.0425599
tr|A0A0G2JXY9|A0A0G2JXY9_RAT	Epsin-2 OS=Rattus norvegicus GN=Epn2 PE=1 SV=1	16.36	27.81	8	0.767204	0.460869	17.64	27.32	8	0.77835	0.10021	18.59	27.81	9	0.954814	0.39035	0.833456	0.105247
tr|Q68FQ9|Q68FQ9_RAT	LanC lantibiotic synthetase component C-like 2 (Bacterial) OS=Rattus norvegicus GN=Lancl2 PE=1 SV=1	9.76	21.78	5	0.73759	0.448803	13.74	29.11	7	0.903861	0.41765	17.97	33.78	9	0.862323	0.122699	0.834592	0.086535
tr|F1LTW9|F1LTW9_RAT	EFR3 homolog B OS=Rattus norvegicus GN=Efr3b PE=1 SV=2	4.08	23.01	2	0.794991	0.354695	10.89	31.58	5	0.976478	0.919568	4.08	24.48	2	0.733214	0.80131	0.834895	0.126446
tr|A0A0G2K7Q7|A0A0G2K7Q7_RAT	Insulin-degrading enzyme OS=Rattus norvegicus GN=Ide PE=1 SV=1	12.82	19.53	7	0.741895	0.296084	11.98	25.77	7	0.71671	0.108852	8.38	30.88	5	1.04905	0.829506	0.835884	0.185034
sp|Q99068|AMRP_RAT	Alpha-2-macroglobulin receptor-associated protein OS=Rattus norvegicus GN=Lrpap1 PE=1 SV=2	6.16	40.83	4	0.668003	0.169993	7.9	48.06	5	0.878094	0.687719	8.8	52.78	5	0.96163	0.917447	0.835909	0.151291
tr|F1LUA1|F1LUA1_RAT	Early endosome antigen 1 OS=Rattus norvegicus GN=Eea1 PE=1 SV=1	45.16	45.07	22	0.744095	0.0657737	56.91	48.05	29	0.932179	0.36205	53.94	50.18	26	0.831824	0.0996552	0.836033	0.0941127
tr|Q6IMX8|Q6IMX8_RAT	Acyl-CoA thioesterase 2 OS=Rattus norvegicus GN=Acot2 PE=1 SV=1	11.4	38.85	6	0.894941	0.392757	11.84	44.59	6	0.908516	0.552823	11.62	39.29	7	0.705718	0.155507	0.836392	0.11337
sp|P10499|KCNA1_RAT	Potassium voltage-gated channel subfamily A member 1 OS=Rattus norvegicus GN=Kcna1 PE=1 SV=1	12.47	29.29	6	1.06052	0.755847	16.02	31.52	9	0.746173	0.189149	15.92	31.31	9	0.705987	0.176179	0.837558	0.194129
tr|Q9JK64|Q9JK64_RAT	ATP-binding cassette subfamily B member 1A OS=Rattus norvegicus GN=Abcb1a PE=1 SV=1	9.84	17.53	5	0.629248	0.354231	15.26	23.9	8	1.10825	0.135739	13.99	24.45	7	0.777257	0.508418	0.838253	0.245259
tr|Q4V8E2|Q4V8E2_RAT	Proteasome (Prosome, macropain) 26S subunit, non-ATPase, 14 OS=Rattus norvegicus GN=Psmd14 PE=1 SV=1	3.92	25.48	3	0.972111	0.842473	7.88	27.42	5	0.719861	0.0738234	4.68	22.26	2	0.822937	0.0798931	0.838303	0.126825
tr|F1M446|F1M446_RAT	Similar to KIAA0368 OS=Rattus norvegicus GN=RGD1306148 PE=1 SV=3	13.86	21.53	8	0.926526	0.823226	20.69	26.97	10	0.757353	0.215956	20.94	21.7	12	0.835314	0.477446	0.839731	0.0846727
sp|A2VD12|PBIP1_RAT	Pre-B-cell leukemia transcription factor-interacting protein 1 OS=Rattus norvegicus GN=Pbxip1 PE=1 SV=1	9.74	38.78	5	0.967909	0.613108	13.07	34.63	7	0.713483	0.534148	16.05	38.64	8	0.839489	0.446732	0.840293	0.127215
tr|A0A0G2K3H2|A0A0G2K3H2_RAT	Dedicator of cytokinesis 7 OS=Rattus norvegicus GN=Dock7 PE=1 SV=1	3.88	19.96	2	0.968539	0.693951	7.9	12.31	7	0.712252	0.249352	3.69	20.39	4	0.842365	0.518104	0.841052	0.128148
tr|D3ZPE5|D3ZPE5_RAT	VPS53 GARP complex subunit OS=Rattus norvegicus GN=Vps53 PE=1 SV=1	5.51	26.56	4	0.842098	0.184208	4.05	20.07	2	0.943163	0.770382	6.04	19.11	3	0.738408	0.217831	0.841223	0.10238
sp|Q6IRE4|TS101_RAT	Tumor susceptibility gene 101 protein OS=Rattus norvegicus GN=Tsg101 PE=1 SV=1	9.86	24.55	5	0.957902	0.788985	10.91	29.67	6	0.904871	0.517134	7.42	30.69	4	0.662072	0.643905	0.841615	0.157733
sp|Q642G4|PEX14_RAT	Peroxisomal membrane protein PEX14 OS=Rattus norvegicus GN=Pex14 PE=1 SV=1	6.01	24.2	3	0.878064	0	6.02	21.01	3	0.601233	0.289797	4.33	21.54	2	1.04834	0.89334	0.842545	0.22566
sp|Q5XIJ6|BABA1_RAT	BRISC and BRCA1-A complex member 1 OS=Rattus norvegicus GN=Babam1 PE=1 SV=1	6.08	26.05	3	0.908836	0.66824	5.78	21.86	4	0.724514	0.177955	4.39	14.37	2	0.895024	0.7757	0.842791	0.102663
tr|G3V816|G3V816_RAT	Nucleoside diphosphate kinase OS=Rattus norvegicus GN=Nme3 PE=1 SV=1	5.03	45.56	3	0.682081	0.556702	7.54	45.56	4	0.868569	0.574176	7.71	44.97	5	0.979509	0.88916	0.843386	0.150305
tr|G3V663|G3V663_RAT	LIM domain kinase 1 OS=Rattus norvegicus GN=Limk1 PE=4 SV=1	5.05	40.49	5	0.887474	0.634458	8.24	35.24	5	0.765099	0.353653	4.72	25.04	2	0.878112	0.651681	0.843562	0.0681117
tr|F1LUT4|F1LUT4_RAT	Phospholipid-transporting ATPase OS=Rattus norvegicus GN=Atp8a1 PE=1 SV=3	29.61	33.5	14	0.943365	0.652559	36.61	34.62	19	0.87956	0.50346	27.23	27.51	14	0.709326	0.135099	0.844084	0.120986
sp|P20417|PTN1_RAT	Tyrosine-protein phosphatase non-receptor type 1 OS=Rattus norvegicus GN=Ptpn1 PE=1 SV=1	7.18	24.77	4	0.68677	0.194538	4.09	29.63	2	0.829322	0	7.77	25.23	4	1.01846	0.866251	0.844851	0.16639
sp|P14046|A1I3_RAT	Alpha-1-inhibitor 3 OS=Rattus norvegicus GN=A1i3 PE=1 SV=1	67.49	35.61	35	0.894125	0.457302	70.16	38.19	37	0.657905	5.07197e-05	56.24	36.22	28	0.98255	0.859481	0.84486	0.167836
tr|G3V8Y8|G3V8Y8_RAT	Huntingtin interacting protein 1, isoform CRA_a OS=Rattus norvegicus GN=Hip1 PE=1 SV=1	11.06	29.71	6	1.03068	0.785191	18.82	40.68	9	0.781442	0.527109	10.43	35.15	5	0.722752	0.536408	0.844959	0.163497
tr|D4A8H3|D4A8H3_RAT	Similar to RIKEN cDNA 5730469D23 (Predicted) OS=Rattus norvegicus GN=Uba6 PE=1 SV=1	28.6	38.94	14	1.02257	0.854396	27.55	26.4	14	0.792846	0.198187	24.52	35.99	13	0.721209	0.319696	0.845541	0.157439
sp|P23928|CRYAB_RAT	Alpha-crystallin B chain OS=Rattus norvegicus GN=Cryab PE=1 SV=1	14.05	56	8	0.662435	0.0006501	13.88	52	8	0.780526	0.0305733	11.87	48.57	7	1.09401	0.584971	0.845656	0.223037
tr|A0A1B0GWY5|A0A1B0GWY5_RAT	Rho guanine nucleotide exchange factor 2 OS=Rattus norvegicus GN=Arhgef2 PE=1 SV=1	11.61	41.75	6	0.689243	0.731484	13.8	32.68	7	1.05029	0.690114	13.58	41.96	7	0.798683	0.210835	0.846071	0.185127
sp|Q4KLZ6|TKFC_RAT	Triokinase/FMN cyclase OS=Rattus norvegicus GN=Tkfc PE=1 SV=1	8.29	20.93	4	1.00396	0.976533	10.85	30.1	5	0.621952	0.288585	9.94	23.18	5	0.912716	0.639151	0.846208	0.199498
tr|A0A0G2JYA4|A0A0G2JYA4_RAT	Serine/threonine-protein phosphatase OS=Rattus norvegicus GN=LOC100362453 PE=3 SV=1	20.38	64.08	10	0.932025	0.716081	28.4	66.02	14	0.784033	0.419149	28.3	66.02	15	0.82262	0.302985	0.846226	0.0767679
tr|A0A0G2JZT0|A0A0G2JZT0_RAT	P2X purinoceptor 7 OS=Rattus norvegicus GN=P2rx7 PE=1 SV=1	4.35	17.53	2	1.11171	0	5.09	21.1	3	0.662979	0.17385	6.05	27.44	3	0.767891	0.238079	0.847528	0.234728
tr|G3V8Q8|G3V8Q8_RAT	RCG40648, isoform CRA_b OS=Rattus norvegicus GN=Sec23ip PE=1 SV=1	5.91	19.52	4	0.950395	0.866715	8.87	20.12	5	0.656724	0.0511358	4.91	11.81	3	0.941336	0.556812	0.849485	0.166997
sp|P62836|RAP1A_RAT	Ras-related protein Rap-1A OS=Rattus norvegicus GN=Rap1a PE=1 SV=1	17.1	52.17	9	1.00435	0.964439	18.06	55.98	10	0.875016	0.262836	17.92	49.46	10	0.670693	0.495791	0.850019	0.168226
tr|F1M9C9|F1M9C9_RAT	Histidyl-tRNA synthetase 2, mitochondrial OS=Rattus norvegicus GN=Hars2 PE=1 SV=1	6.09	31.36	4	0.738044	0.544523	13.55	33.33	7	0.968932	0.836382	10.09	26.23	5	0.843996	0.551905	0.850324	0.115574
sp|M0RC99|RAB5A_RAT	Ras-related protein Rab-5A OS=Rattus norvegicus GN=Rab5a PE=2 SV=1	14.34	67.44	7	0.943338	0.734777	18.04	48.37	11	0.819176	0.169637	16.37	48.37	8	0.790579	0.11603	0.851031	0.0812086
sp|Q5FWS6|KAZRN_RAT	Kazrin OS=Rattus norvegicus GN=Kazn PE=2 SV=2	6.03	25.64	3	0.912202	0	5.32	29.74	3	0.644224	0.644612	7.03	29.49	4	0.99806	0.991578	0.851495	0.184564
tr|D3ZSA9|D3ZSA9_RAT	Nodal modulator 1 OS=Rattus norvegicus GN=Nomo1 PE=1 SV=1	21.33	20.84	10	0.660482	0.31406	23.18	23.81	12	0.968004	0.900034	22.51	27.27	12	0.9274	0.847034	0.851962	0.167065
sp|Q8K1Q0|NMT1_RAT	Glycylpeptide N-tetradecanoyltransferase 1 OS=Rattus norvegicus GN=Nmt1 PE=1 SV=1	7.21	20.56	5	0.813654	0.526593	8.61	31.65	4	0.932448	0.741552	8.27	21.57	4	0.810611	0.407939	0.852238	0.0694811
tr|D3Z956|D3Z956_RAT	Retinaldehyde binding protein 1 (Predicted), isoform CRA_a OS=Rattus norvegicus GN=Rlbp1 PE=4 SV=1	5.41	47	3	0.776852	0.080801	10.66	41.01	6	1.01757	0.936858	9.94	41.64	6	0.763135	0.442954	0.85252	0.143104
tr|F1MAF8|F1MAF8_RAT	Autophagy related 2B OS=Rattus norvegicus GN=Atg2b PE=1 SV=2	6.9	18.61	4	0.706838	0.497306	11.34	25.7	8	0.98941	0.926815	4.85	18.97	3	0.861586	0.123566	0.852612	0.141499
sp|B5DF91|ELAV1_RAT	ELAV-like protein 1 OS=Rattus norvegicus GN=Elavl1 PE=1 SV=1	16.37	62.88	8	0.769792	0.0530737	13.02	52.15	7	0.923243	0.507787	15.84	51.23	8	0.865286	0.150036	0.852774	0.0774867
sp|Q769K2|NAPEP_RAT	N-acyl-phosphatidylethanolamine-hydrolyzing phospholipase D OS=Rattus norvegicus GN=Napepld PE=1 SV=1	7.38	26.01	3	0.981392	0.763346	4.06	18.18	3	0.742259	0.493312	6.84	33.33	4	0.834861	0.311092	0.852837	0.120576
sp|Q5BJU7|WASF1_RAT	Wiskott-Aldrich syndrome protein family member 1 OS=Rattus norvegicus GN=Wasf1 PE=1 SV=1	4.44	18.96	2	0.914004	0.714096	3.91	23.61	3	0.893247	0.408143	6.49	17.17	3	0.751601	0.143493	0.852951	0.0883832
sp|Q5U2X6|CCD47_RAT	Coiled-coil domain-containing protein 47 OS=Rattus norvegicus GN=Ccdc47 PE=2 SV=1	7.21	24.43	5	0.671409	0.257067	10.04	31.47	5	0.830528	0.203982	5.27	40.37	3	1.05695	0.726784	0.852961	0.193746
tr|E9PSK7|E9PSK7_RAT	Mitogen-activated protein kinase 8-interacting protein 3 OS=Rattus norvegicus GN=Mapk8ip3 PE=1 SV=2	20.77	23.75	11	1.02772	0.64017	25.3	27.69	13	0.820174	0.188712	24.59	31.47	12	0.711832	0.179123	0.853241	0.160518
sp|Q8VHK0|ACOT8_RAT	Acyl-coenzyme A thioesterase 8 OS=Rattus norvegicus GN=Acot8 PE=1 SV=1	7.91	22.81	4	0.720979	0.0730927	4.72	30.31	2	0.91537	0.697504	6.36	26.25	3	0.925117	0.655013	0.853822	0.115149
sp|Q62688|PLCL1_RAT	Inactive phospholipase C-like protein 1 OS=Rattus norvegicus GN=Plcl1 PE=1 SV=1	50.17	41.15	26	0.83663	0.112128	51.08	37.96	25	0.9369	0.611199	55.46	41.97	26	0.789233	0.0816759	0.854255	0.0753947
sp|P11497|ACACA_RAT	Acetyl-CoA carboxylase 1 OS=Rattus norvegicus GN=Acaca PE=1 SV=1	41.1	25.67	24	0.912753	0.266204	44.54	35.35	27	0.832431	0.227065	51.83	32.62	28	0.818297	0.183346	0.854494	0.0509462
sp|P62749|HPCL1_RAT	Hippocalcin-like protein 1 OS=Rattus norvegicus GN=Hpcal1 PE=1 SV=2	15.7	67.36	8	0.828514	0.63499	14.52	60.62	8	0.900869	0.745296	19.63	62.18	10	0.835376	0.509382	0.85492	0.0399413
tr|F1M4A4|F1M4A4_RAT	Kinesin family member 1A OS=Rattus norvegicus GN=Kif1a PE=1 SV=3	45.57	36.73	25	0.884076	0.306897	46.19	34.62	23	0.844228	0.194812	42.12	42.88	23	0.836758	0.195396	0.855021	0.0254384
sp|Q9JJ50|HGS_RAT	Hepatocyte growth factor-regulated tyrosine kinase substrate OS=Rattus norvegicus GN=Hgs PE=1 SV=1	5.43	25.13	3	0.914188	0.925253	11.09	21.91	6	0.816804	0.687057	10.54	26.93	7	0.838731	0.627414	0.856574	0.0510851
tr|D3ZN95|D3ZN95_RAT	Host cell factor C1 OS=Rattus norvegicus GN=Hcfc1 PE=1 SV=1	7.25	12.98	5	0.930141	0.710099	8.67	13.77	6	0.808576	0.534531	5.73	11.55	5	0.831386	0.453673	0.856701	0.0646157
sp|Q5XIJ4|F210A_RAT	Protein FAM210A OS=Rattus norvegicus GN=Fam210a PE=2 SV=1	4.68	19.41	3	0.82047	0.350157	5.45	35.16	3	0.895533	0.51769	7.28	31.14	4	0.854512	0.235337	0.856838	0.0375856
tr|F1M7N7|F1M7N7_RAT	Ribosomal protein S6 kinase OS=Rattus norvegicus GN=Rps6ka2 PE=3 SV=2	10.68	36.7	6	0.853912	0.513928	16.99	33.97	9	0.800763	0.444279	8.97	36.29	5	0.916712	0.732931	0.857129	0.0580417
tr|A0A0G2K0M8|A0A0G2K0M8_RAT	Neural cell adhesion molecule 1 OS=Rattus norvegicus GN=Ncam1 PE=1 SV=1	50.79	46.36	27	1.12577	0.661908	49.24	42.32	26	0.787343	0.344943	46.63	37.6	24	0.659003	0.0508788	0.857374	0.241137
tr|A0A0G2QC02|A0A0G2QC02_RAT	Ski2-like RNA helicase OS=Rattus norvegicus GN=Skiv2l PE=1 SV=1	9.87	19.61	6	0.931171	0.741497	8.8	23.23	5	0.773171	0.155256	6.73	22.35	5	0.86861	0.587651	0.857651	0.0795683
tr|Q32KJ5|Q32KJ5_RAT	N-acetylglucosamine-6-sulfatase OS=Rattus norvegicus GN=Gns PE=1 SV=1	5.3	19.85	3	1.06611	0.644149	5.31	15.63	4	0.598716	0.598467	1.32	17.65	2	0.909872	0.657351	0.858234	0.237939
tr|D3ZN39|D3ZN39_RAT	Ubiquitin specific protease 8 (Predicted) OS=Rattus norvegicus GN=Usp8 PE=1 SV=2	11.82	30.8	6	0.804185	0.607155	9.9	30.53	5	0.938287	0.863442	15.84	31.27	8	0.832572	0.59481	0.858348	0.0706691
sp|Q6AYQ1|GOGA7_RAT	Golgin subfamily A member 7 OS=Rattus norvegicus GN=Golga7 PE=2 SV=1	4.18	34.31	2	0.581705	0.27548	4.53	48.91	3	1.01507	0.88497	4.01	44.53	2	0.98098	0.884322	0.859253	0.240967
tr|G3V9U0|G3V9U0_RAT	Acyl-CoA synthetase short-chain family member 2 OS=Rattus norvegicus GN=Acss2 PE=1 SV=1	22.15	30.81	11	0.900172	0.769694	23.55	39.51	11	0.840392	0.591636	27.39	40.8	13	0.840165	0.549125	0.860243	0.0345799
tr|F1M9B5|F1M9B5_RAT	Calcium-transporting ATPase OS=Rattus norvegicus GN=Atp2c1 PE=1 SV=3	7.68	25.6	4	1.02611	0.8408	3.72	22.4	2	0.809896	0.351706	4.69	29.87	3	0.744991	0	0.860333	0.14719
tr|A0A140TAF2|A0A140TAF2_RAT	ELAV-like protein OS=Rattus norvegicus GN=Elavl4 PE=1 SV=1	9.24	35.84	5	0.838347	0.335413	11.62	44.42	6	0.885889	0	12.28	46.23	6	0.856955	0	0.860397	0.0239573
tr|Q5M9H4|Q5M9H4_RAT	Sodium/potassium-transporting ATPase subunit beta OS=Rattus norvegicus GN=Atp1b2 PE=1 SV=1	26.22	47.59	14	0.816711	0.5556	25.95	37.93	14	0.888691	0.705467	26.18	41.72	14	0.876103	0.688221	0.860502	0.0384428
tr|D4AD15|D4AD15_RAT	Eukaryotic translation initiation factor 4 gamma, 1 OS=Rattus norvegicus GN=Eif4g1 PE=1 SV=2	11.02	26.51	6	0.824721	0.581059	13.9	21.67	9	0.793037	0.332315	13.08	24.81	8	0.963926	0.685737	0.860561	0.0909077
tr|Q5RKI5|Q5RKI5_RAT	FLII, actin-remodeling protein OS=Rattus norvegicus GN=Flii PE=1 SV=1	11.21	18.9	6	1.11004	0.82643	9.89	28.74	5	0.749575	0.384279	11.65	26.3	7	0.722372	0.364754	0.860661	0.216393
tr|F1LN92|F1LN92_RAT	AFG3-like matrix AAA peptidase subunit 2 OS=Rattus norvegicus GN=Afg3l2 PE=1 SV=1	25.07	37.53	12	0.948295	0.275045	35.68	46.76	17	0.803401	0.358167	31.61	40.02	17	0.832393	0.401783	0.861363	0.0766683
tr|A0A0A0MY39|A0A0A0MY39_RAT	ATP-binding cassette sub-family B member 9 OS=Rattus norvegicus GN=Abcb9 PE=4 SV=2	12.93	18.5	6	0.82485	0.416011	14.31	27.82	7	0.923872	0.659634	12.05	20.73	7	0.835752	0.501165	0.861491	0.0542977
tr|F7ES73|F7ES73_RAT	Negative regulator of ubiquitin-like proteins 1 OS=Rattus norvegicus GN=Nub1 PE=1 SV=1	5.91	22.06	3	0.684401	0.441765	11.68	29.25	7	0.886566	0.775929	6.53	23.2	4	1.01378	0.965522	0.861582	0.166104
tr|G3V7L1|G3V7L1_RAT	Utrophin OS=Rattus norvegicus GN=Utrn PE=1 SV=3	17.88	25.68	14	0.7277	0.0532452	17.57	27.84	13	0.97371	0.77867	25.35	27.64	18	0.883892	0.390015	0.861768	0.124488
tr|F1LQZ3|F1LQZ3_RAT	Kinesin-like protein OS=Rattus norvegicus GN=Kif3a PE=1 SV=2	7.01	33.33	4	0.838334	0.30325	15.59	38.89	8	0.902229	0.718774	13.55	36.32	7	0.845249	0.595015	0.861937	0.0350645
tr|F1M9W9|F1M9W9_RAT	Similar to TRS85 homolog (Predicted) OS=Rattus norvegicus GN=Trappc8 PE=1 SV=2	5.04	26.8	4	0.852581	0.637936	3.9	19.54	2	0.87439	0.233686	6.41	18.21	5	0.862169	0.709698	0.863047	0.0109305
sp|O08719|EVL_RAT	Ena/VASP-like protein OS=Rattus norvegicus GN=Evl PE=1 SV=2	9.64	44.52	5	0.937263	0.697538	7.79	36.67	4	0.740394	0.397673	6.96	32.86	4	0.91293	0.795471	0.863529	0.10733
sp|Q8CF97|VCIP1_RAT	Deubiquitinating protein VCIP135 OS=Rattus norvegicus GN=Vcpip1 PE=1 SV=2	22.7	32.19	12	0.797934	0.4848	19.15	30.38	10	1.02443	0.776639	14.92	35.63	8	0.774214	0.1186	0.865527	0.138126
tr|A0A0G2JW88|A0A0G2JW88_RAT	Microtubule-associated protein OS=Rattus norvegicus GN=Map4 PE=1 SV=1	63.81	29.4	34	0.904797	0.583775	62.29	29.94	32	0.836137	0.317681	64.82	31.94	34	0.856762	0.633133	0.865899	0.0352303
tr|A0A0G2KAZ7|A0A0G2KAZ7_RAT	Heterogeneous nuclear ribonucleoprotein D-like OS=Rattus norvegicus GN=Hnrnpdl PE=1 SV=1	9.89	41.05	6	1.10659	0.648512	13.07	42.72	7	0.746903	0.742984	10.45	41.29	6	0.744465	0.405896	0.865984	0.20837
tr|D3ZNK1|D3ZNK1_RAT	Metaxin 3 OS=Rattus norvegicus GN=Mtx3 PE=1 SV=2	10.68	34.73	5	1.09293	0.452767	8.5	41.16	4	0.777509	0.256679	6.72	35.05	4	0.727933	0.527601	0.866124	0.197978
tr|D4A0E8|D4A0E8_RAT	Protein arginine N-methyltransferase 5 OS=Rattus norvegicus GN=Prmt5 PE=1 SV=1	9.47	29.2	6	1.03066	0.907151	8.21	26.53	4	0.921063	0.329429	8.79	21.98	4	0.646736	0.0772095	0.866153	0.197764
tr|D3ZWX4|D3ZWX4_RAT	NCK-interacting protein with SH3 domain OS=Rattus norvegicus GN=Nckipsd PE=1 SV=3	21.86	35.74	12	0.958591	0.717264	29.65	36.6	16	0.783179	0.502224	33.57	37.45	16	0.85736	0.674172	0.866377	0.0880529
sp|P53987|MOT1_RAT	Monocarboxylate transporter 1 OS=Rattus norvegicus GN=Slc16a1 PE=1 SV=1	15.19	17.81	8	0.878364	0.193041	12.97	18.42	7	0.856464	0.16965	15.43	16.6	8	0.866529	0.447101	0.867119	0.010962
tr|G3V9X2|G3V9X2_RAT	G-protein signalling modulator 1 (AGS3-like, C. elegans), isoform CRA_c OS=Rattus norvegicus GN=Gpsm1 PE=1 SV=1	9.44	44.58	4	1.04965	0.82596	23.88	57.95	12	0.857226	0.26941	9.38	43.68	5	0.694854	0.230317	0.867244	0.177612
tr|A0A0G2K0W9|A0A0G2K0W9_RAT	Proteasome subunit alpha type OS=Rattus norvegicus GN=Psma7 PE=1 SV=1	18.57	55.24	9	1.02286	0.905886	18.98	63.71	10	0.745574	0.21556	20.31	54.44	10	0.833344	0.477125	0.867259	0.141719
tr|D3ZTT7|D3ZTT7_RAT	Sad1 and UNC84 domain-containing 2 OS=Rattus norvegicus GN=Sun2 PE=1 SV=1	7.01	28.22	4	0.687618	0.79244	8.68	31.1	4	0.967435	0.940597	3.38	19.86	2	0.949969	0.809104	0.868341	0.156754
tr|M0RCX0|M0RCX0_RAT	Pterin-4 alpha-carbinolamine dehydratase 2 OS=Rattus norvegicus GN=Pcbd2 PE=1 SV=1	4.4	48.82	2	0.967343	0.934306	6.1	64.57	3	0.738034	0.538106	4.87	49.61	3	0.899731	0.60173	0.868369	0.117827
tr|B5DEZ6|B5DEZ6_RAT	Glucosamine-6-phosphate isomerase OS=Rattus norvegicus GN=Gnpda2 PE=1 SV=1	7.31	45.65	4	0.809858	0.685427	8.9	42.03	5	0.903902	0.22948	7.38	37.32	4	0.891603	0.344391	0.868454	0.0511167
tr|D3ZJR1|D3ZJR1_RAT	Epidermal growth factor receptor pathway substrate 15-like 1 OS=Rattus norvegicus GN=Eps15l1 PE=1 SV=3	23.03	28.16	11	0.839579	0.27582	25.6	35.42	13	0.823632	0.120393	23.47	34.32	12	0.942749	0.737147	0.868653	0.0646622
tr|D3ZN27|D3ZN27_RAT	DnaJ heat shock protein family (Hsp40) member C13 OS=Rattus norvegicus GN=Dnajc13 PE=1 SV=2	7.34	25.81	4	1.10484	0.911679	10.28	20.2	5	0.682845	0.42086	6.93	20.51	5	0.820961	0.523087	0.869549	0.215152
tr|A0A0G2K2Q2|A0A0G2K2Q2_RAT	Glycine C-acetyltransferase OS=Rattus norvegicus GN=Gcat PE=1 SV=1	4.06	20.67	2	0.999391	0.998047	8.18	29.09	4	0.812967	0.0659333	4.24	27.64	2	0.797724	0.112609	0.870027	0.112291
tr|D3ZMS3|D3ZMS3_RAT	Matrilin 4 OS=Rattus norvegicus GN=Matn4 PE=4 SV=1	9.67	31.73	5	0.803997	0.613051	18.2	28.21	9	1.0415	0.895105	11.64	27.88	6	0.765148	0.476429	0.870214	0.149602
sp|Q9EQZ1|T22D3_RAT	TSC22 domain family protein 3 OS=Rattus norvegicus GN=Tsc22d3 PE=1 SV=1	3.5	42.54	2	0.917576	0.642736	4.99	58.96	3	0.972387	0	7.28	69.4	4	0.725778	0	0.871914	0.12949
tr|D3ZS72|D3ZS72_RAT	Phosphatidylinositol-3,4,5-trisphosphate-dependent Rac exchange factor 1 OS=Rattus norvegicus GN=Prex1 PE=1 SV=3	6.21	18.81	3	1.03567	0	4.37	25.2	3	0.568217	0.475227	6.33	19.66	3	1.01208	0.907657	0.871991	0.26334
sp|Q0ZCA7|CLC2L_RAT	C-type lectin domain family 2 member L OS=Rattus norvegicus GN=Clec2l PE=1 SV=2	9.15	46.92	5	1.02907	0.779514	9.02	43.6	5	0.853488	0.703177	10.81	47.39	6	0.735171	0.513122	0.872577	0.147878
tr|A0A0G2JSR7|A0A0G2JSR7_RAT	Matrin-3 OS=Rattus norvegicus GN=Matr3 PE=1 SV=1	31.71	43.08	17	0.882184	0.735376	36.73	39.76	18	0.91328	0.719608	31.47	43.31	16	0.822507	0.45265	0.872657	0.0461304
tr|A0A0G2K4A0|A0A0G2K4A0_RAT	RAB11 family-interacting protein 5 OS=Rattus norvegicus GN=Rab11fip5 PE=1 SV=1	20.7	29.09	10	1.0211	0.899054	17.58	40.88	10	0.848982	0.394444	17.82	38.84	9	0.748524	0.471356	0.872868	0.137848
tr|Q4KLI7|Q4KLI7_RAT	Splicing factor 3a, subunit 3 OS=Rattus norvegicus GN=Sf3a3 PE=1 SV=1	4.03	18.36	2	0.742966	0.528717	4.04	22.55	2	0.692506	0.476301	4.02	27.35	2	1.1861	0.505862	0.873858	0.271586
sp|Q8VHT6|AS3MT_RAT	Arsenite methyltransferase OS=Rattus norvegicus GN=As3mt PE=1 SV=1	4.53	31.17	3	0.784112	0.267018	6.33	36.86	3	0.978738	0.814187	9	35.5	5	0.858918	0.121728	0.873922	0.0981768
tr|A0A0G2JV65|A0A0G2JV65_RAT	14-3-3 protein zeta/delta OS=Rattus norvegicus GN=Ywhaz PE=1 SV=1	44.47	79.69	24	0.98419	0.76845	45.63	82.42	23	0.851573	0.489852	44.21	74.22	22	0.786984	0.294088	0.874249	0.10054
tr|F1M8V2|F1M8V2_RAT	Ubiquitination factor E4B OS=Rattus norvegicus GN=Ube4b PE=1 SV=3	6.46	16.37	4	1.04923	0.573075	7.25	19.95	4	0.619006	0.527904	9.26	28.9	6	0.955644	0.750067	0.874627	0.226265
tr|D4ACM1|D4ACM1_RAT	Elongator complex protein 3 OS=Rattus norvegicus GN=Elp3 PE=1 SV=2	8.5	45.7	5	0.95243	0.807053	5.8	40.4	3	0.798072	0.737969	3.66	38.21	2	0.875861	0.790928	0.875454	0.0771801
sp|Q68FW9|CSN3_RAT	COP9 signalosome complex subunit 3 OS=Rattus norvegicus GN=Cops3 PE=1 SV=1	14.39	43.74	8	0.784038	0.270674	14.35	44.92	7	0.886248	0.660996	16.23	35.7	8	0.957196	0.684271	0.875827	0.0870481
tr|D4A554|D4A554_RAT	Eukaryotic translation initiation factor 4 gamma, 3 OS=Rattus norvegicus GN=Eif4g3 PE=1 SV=2	12.15	28.55	7	0.863147	0.438026	11.3	22.74	7	0.750615	0.108456	10.07	18.83	6	1.01377	0.977722	0.875845	0.132037
tr|D3ZX42|D3ZX42_RAT	G protein-coupled receptor 21 (Predicted), isoform CRA_a OS=Rattus norvegicus GN=Rabgap1 PE=1 SV=1	7.42	28.17	5	0.980124	0.874197	8.63	20.47	5	0.689329	0.355645	13.46	25.54	7	0.960007	0.73164	0.876487	0.162395
sp|P55770|NH2L1_RAT	NHP2-like protein 1 OS=Rattus norvegicus GN=Snu13 PE=2 SV=4	4.8	44.53	3	0.947032	0.752875	3.66	18.75	2	0.694506	0	4.78	32.03	3	0.988003	0.955583	0.876514	0.158949
tr|D3ZXS8|D3ZXS8_RAT	Huntingtin interacting protein 2 (Predicted), isoform CRA_a OS=Rattus norvegicus GN=Ube2k PE=1 SV=1	8.58	44	5	0.78556	0.369295	6.88	43	3	0.982906	0.953301	7.2	42	3	0.864369	0.523581	0.877612	0.0993368
sp|Q5FVM4|NONO_RAT	Non-POU domain-containing octamer-binding protein OS=Rattus norvegicus GN=Nono PE=1 SV=3	3.73	35.71	3	0.758186	0.0137861	7.85	46.43	4	0.806998	0.0779444	12.73	30.67	6	1.06851	0.505165	0.877897	0.166868
sp|Q920F5|DCMC_RAT	Malonyl-CoA decarboxylase, mitochondrial OS=Rattus norvegicus GN=Mlycd PE=1 SV=1	9.46	30.49	6	0.833476	0.270924	7.05	30.89	3	1.01091	0.92416	10.11	36.18	5	0.790686	0.161039	0.878359	0.116773
sp|Q5FVI4|CEND_RAT	Cell cycle exit and neuronal differentiation protein 1 OS=Rattus norvegicus GN=Cend1 PE=1 SV=1	14.18	71.14	7	0.830398	0.253598	16.55	69.8	8	0.954472	0.870022	16	69.8	8	0.850524	0.627218	0.878465	0.0665894
sp|P17256|KIME_RAT	Mevalonate kinase OS=Rattus norvegicus GN=Mvk PE=1 SV=1	10.2	25.57	5	0.885285	0.689299	10.49	30.89	5	0.882962	0.276398	12.51	33.92	6	0.868688	0.637503	0.878978	0.008987
sp|O35078|OXDA_RAT	D-amino-acid oxidase OS=Rattus norvegicus GN=Dao PE=2 SV=1	14.87	28.32	8	0.833685	0.149719	8.97	27.75	5	0.894973	0.289984	12.39	23.12	7	0.91131	0.320154	0.87999	0.0409244
sp|P56571|ES1_RAT	ES1 protein homolog, mitochondrial OS=Rattus norvegicus PE=1 SV=2	15.54	70.3	8	0.947007	0.86754	18.53	65.79	9	0.894569	0.572973	16.47	66.17	8	0.798757	0.234263	0.880111	0.075175
sp|P60203|MYPR_RAT	Myelin proteolipid protein OS=Rattus norvegicus GN=Plp1 PE=1 SV=2	18.9	38.27	10	0.876974	0.108732	21.4	32.49	13	0.94748	0.405798	18.7	31.41	10	0.815996	0.0216439	0.88015	0.0657996
tr|F1LUD3|F1LUD3_RAT	AHNAK nucleoprotein 2 OS=Rattus norvegicus GN=Ahnak2 PE=1 SV=2	56.23	41.22	39	0.897892	0.364561	58.32	40.51	36	0.844425	0.230701	63.66	40.04	40	0.898333	0.361353	0.880217	0.0309971
sp|Q6AYD9|NUD19_RAT	Nucleoside diphosphate-linked moiety X motif 19 OS=Rattus norvegicus GN=Nudt19 PE=2 SV=1	4.17	28.57	2	0.926543	0.914566	4.71	20.17	3	0.911459	0.66792	6.02	28.01	3	0.802984	0.273618	0.880329	0.067406
tr|B2RYL4|B2RYL4_RAT	Armadillo repeat-containing 6 OS=Rattus norvegicus GN=Armc6 PE=1 SV=1	4.44	21.15	2	0.915763	0.549476	8.09	26.5	4	0.880129	0.604113	8.34	28.85	4	0.847248	0.24776	0.881047	0.0342668
tr|D3ZKG1|D3ZKG1_RAT	Methylmalonyl CoA mutase OS=Rattus norvegicus GN=Mut PE=1 SV=2	11.62	20.41	6	0.937668	0.514086	13.38	28.09	7	0.824843	0.216216	10.43	28.21	6	0.880982	0.12105	0.881164	0.0564132
sp|Q9QZG1|S22AN_RAT	Solute carrier family 22 member 23 OS=Rattus norvegicus GN=Slc22a23 PE=2 SV=2	4.01	11.61	2	0.80643	0.645092	8.49	13.79	5	0.990785	0.931698	6	11.9	3	0.846407	0.205184	0.881207	0.0969792
tr|D3ZF86|D3ZF86_RAT	ARFGEF family member 3 OS=Rattus norvegicus GN=Arfgef3 PE=1 SV=3	7.04	17.14	4	0.769809	0.299405	13.29	14.55	7	0.826683	0.561773	3.2	14.86	2	1.04736	0	0.881284	0.14661
sp|Q6AYT5|ARMT1_RAT	Protein-glutamate O-methyltransferase OS=Rattus norvegicus GN=Armt1 PE=1 SV=1	6.16	25.97	3	0.690436	0.170348	7.24	34.85	6	1.05041	0.60993	2.12	18.91	2	0.903921	0.50574	0.88159	0.181023
tr|A0A0G2K9I8|A0A0G2K9I8_RAT	Protein arginine methyltransferase 1-like OS=Rattus norvegicus GN=LOC100361025 PE=3 SV=1	12.33	37.68	6	0.743907	0.179824	12.28	53.82	6	0.879868	0.787463	13.3	44.19	7	1.02107	0.937359	0.881616	0.138591
tr|M0RD40|M0RD40_RAT	SIK family kinase 3 OS=Rattus norvegicus GN=Sik3 PE=1 SV=2	11.06	19.91	6	0.822106	0.271843	19.21	22.27	12	0.944923	0.672773	22.04	20.75	11	0.878135	0.35496	0.881722	0.0614868
sp|P97532|THTM_RAT	3-mercaptopyruvate sulfurtransferase OS=Rattus norvegicus GN=Mpst PE=1 SV=3	20	55.22	10	0.862564	0.542418	17.77	55.22	9	0.815946	0.370405	18.02	48.15	9	0.967023	0.904499	0.881844	0.0773619
sp|Q5XIE1|THEM6_RAT	Protein THEM6 OS=Rattus norvegicus GN=Them6 PE=2 SV=1	9.53	58.45	5	0.949453	0.81674	11.69	54.59	7	0.771972	0.462548	7.1	48.31	4	0.925096	0.822298	0.882174	0.0962113
sp|Q9Z1W6|LYRIC_RAT	Protein LYRIC OS=Rattus norvegicus GN=Mtdh PE=1 SV=2	12	32.01	6	1.08182	0.306853	13.42	27.88	7	0.734659	0.732743	13.83	34.77	8	0.830815	0.506509	0.882431	0.179244
tr|F1LQI1|F1LQI1_RAT	Hydroxyacyl glutathione hydrolase OS=Rattus norvegicus GN=Hagh PE=1 SV=2	17.29	44.66	9	0.988267	0.882138	18.42	52.1	10	0.885015	0.168824	19.31	57.61	10	0.774475	0.251443	0.882585	0.106917
sp|P41542|USO1_RAT	General vesicular transport factor p115 OS=Rattus norvegicus GN=Uso1 PE=1 SV=1	33	32.53	18	0.970455	0.563603	39.56	33.79	19	0.850648	0.362191	38.79	37.12	19	0.826837	0.104994	0.882646	0.0769704
tr|M0R7U1|M0R7U1_RAT	Adenylate kinase 5 OS=Rattus norvegicus GN=Ak5 PE=1 SV=1	6.73	24.73	4	0.86117	0.425446	9.57	27.22	5	1.03921	0.643021	5.75	24.73	3	0.7483	0.232997	0.882895	0.146668
sp|P21818|STMN2_RAT	Stathmin-2 OS=Rattus norvegicus GN=Stmn2 PE=1 SV=2	8.84	34.64	5	0.877955	0.782302	11.16	58.66	6	1.03209	0.897784	13.23	63.13	7	0.739465	0.776194	0.883169	0.146381
sp|P30713|GSTT2_RAT	Glutathione S-transferase theta-2 OS=Rattus norvegicus GN=Gstt2 PE=1 SV=3	11.78	44.67	6	1.03526	0.850252	12.96	31.97	7	0.766928	0.0916675	10.63	49.18	5	0.847709	0.127761	0.883298	0.13766
sp|Q5U2N0|PYRG2_RAT	CTP synthase 2 OS=Rattus norvegicus GN=Ctps2 PE=1 SV=1	6.06	21.16	3	1.03155	0.750925	2.45	14.51	2	0.936993	0.720441	4.56	23.21	2	0.683975	0.167143	0.884173	0.179708
sp|P97685|NFASC_RAT	Neurofascin OS=Rattus norvegicus GN=Nfasc PE=1 SV=2	60.19	43.71	29	0.679826	0.765418	67.88	41.69	36	1.09347	0.405151	62.59	44.52	32	0.881283	0.270779	0.884859	0.206845
tr|B2RZC6|B2RZC6_RAT	Ilf2 protein OS=Rattus norvegicus GN=Ilf2 PE=1 SV=1	10.29	20.51	5	0.964416	0.704728	9.61	22.82	5	0.875094	0.585382	13.3	21.79	7	0.815094	0.514933	0.884868	0.0751394
tr|D3ZAL7|D3ZAL7_RAT	GRB2-associated-binding protein 1 OS=Rattus norvegicus GN=Gab1 PE=1 SV=2	9.95	25.11	5	0.976167	0.91353	7.39	18.33	4	0.965573	0.676684	5.09	19.77	3	0.713314	0.194844	0.885018	0.148794
sp|Q03344|ATIF1_RAT	ATPase inhibitor, mitochondrial OS=Rattus norvegicus GN=Atpif1 PE=3 SV=2	8.63	40.19	5	0.947707	0.667136	6.99	43.93	5	0.849577	0.556754	8.54	41.12	5	0.863338	0.554215	0.886874	0.0531304
tr|A0A0G2JYR1|A0A0G2JYR1_RAT	Exocyst complex component OS=Rattus norvegicus GN=Exoc6b PE=1 SV=1	8.12	20.86	5	0.834326	0.620252	12.72	26.79	6	1.06609	0.778207	10.01	28.52	5	0.760775	0.3715	0.887064	0.159345
sp|Q5U2Q3|CK054_RAT	Ester hydrolase C11orf54 homolog OS=Rattus norvegicus PE=1 SV=1	6.1	21.27	3	0.96373	0.750296	8.82	27.62	5	0.88143	0.170492	9.91	21.9	5	0.817826	0.0875205	0.887662	0.0731514
sp|Q63356|MYO1E_RAT	Unconventional myosin-Ie OS=Rattus norvegicus GN=Myo1e PE=1 SV=1	30.19	31.89	14	0.960357	0.710743	23.18	33.69	11	0.85874	0.180285	29.73	34.78	15	0.843894	0.226416	0.887664	0.0633904
tr|D3ZZ38|D3ZZ38_RAT	Sorting nexin OS=Rattus norvegicus GN=Snx18 PE=1 SV=1	8	20.16	4	0.9905	0.93985	7.57	26.34	4	0.836374	0.0547717	7.63	21.63	4	0.837576	0.472224	0.88815	0.0886401
tr|D3Z9H2|D3Z9H2_RAT	Hyaluronan and proteoglycan link protein 4 OS=Rattus norvegicus GN=Hapln4 PE=4 SV=1	9.21	40.5	5	0.935768	0.785355	12.03	39	7	0.907705	0.583297	17.16	35.25	10	0.823411	0.321911	0.888962	0.0584765
tr|D3ZC15|D3ZC15_RAT	Capping protein regulator and myosin 1 linker 2 OS=Rattus norvegicus GN=Carmil2 PE=1 SV=2	7.07	17.69	5	0.85546	0.401972	4.09	14.84	3	0.892958	0.490702	5.83	16.74	3	0.92198	0.814376	0.890132	0.03335
sp|Q64542|AT2B4_RAT	Plasma membrane calcium-transporting ATPase 4 OS=Rattus norvegicus GN=Atp2b4 PE=1 SV=1	38.66	27.51	19	0.963047	0.578036	48.68	35.16	25	0.92666	0.357471	42.64	31.34	21	0.781424	0.010256	0.890377	0.0960941
tr|F1M1Y1|F1M1Y1_RAT	Uncharacterized protein OS=Rattus norvegicus PE=1 SV=1	17.35	46.24	9	0.944301	0	18.1	47.85	9	0.615606	0	17.85	50	9	1.11319	0	0.891031	0.253032
sp|Q68FX1|MPI_RAT	Mannose-6-phosphate isomerase OS=Rattus norvegicus GN=Mpi PE=2 SV=1	15.56	39.01	8	0.886524	0.583638	12.1	30.02	7	0.869268	0.153621	16.07	34.04	8	0.917881	0.176086	0.891224	0.024645
sp|Q4QQV3|F162A_RAT	Protein FAM162A OS=Rattus norvegicus GN=Fam162a PE=2 SV=1	7.14	52.9	4	1.10727	0.436251	6.12	38.06	3	0.89861	0.739119	4.05	36.13	2	0.66781	0.583619	0.89123	0.219823
tr|F1LMM8|F1LMM8_RAT	[Pyruvate dehydrogenase (acetyl-transferring)] kinase isozyme 2, mitochondrial OS=Rattus norvegicus GN=Pdk2 PE=1 SV=3	6.79	34.64	4	0.96189	0.689882	9.86	30.47	5	0.883155	0.606425	6.64	35.63	3	0.829881	0.178423	0.891642	0.0664123
sp|P84586|RMXRL_RAT	RNA-binding motif protein, X chromosome retrogene-like OS=Rattus norvegicus GN=Rbmxrtl PE=1 SV=1	5.65	62.37	3	0.690907	0.0522946	4.02	50.77	2	1.06207	0	4.11	66.75	2	0.922224	0.657008	0.891733	0.18745
sp|P37805|TAGL3_RAT	Transgelin-3 OS=Rattus norvegicus GN=Tagln3 PE=1 SV=2	30.35	84.42	15	0.937634	0.365645	30.26	88.94	15	0.874556	0.17312	33.47	89.45	18	0.864575	0.393626	0.892255	0.0396149
sp|O35274|NEB2_RAT	Neurabin-2 OS=Rattus norvegicus GN=Ppp1r9b PE=1 SV=1	11.02	30.48	6	0.88681	0.440654	10.21	32.31	5	0.887956	0.58652	10.69	32.19	6	0.903149	0.57909	0.892638	0.00912102
tr|D4A6H8|D4A6H8_RAT	Catenin alpha 2 OS=Rattus norvegicus GN=Ctnna2 PE=1 SV=3	15.37	35.29	7	0.968363	0.810461	14.13	36.97	7	0.677969	0.068847	15.33	41.39	8	1.03178	0.97193	0.892705	0.188651
sp|P04638|APOA2_RAT	Apolipoprotein A-II OS=Rattus norvegicus GN=Apoa2 PE=2 SV=1	1.88	37.25	2	0.856493	0.674717	4.84	37.25	3	0.960678	0.685204	4.39	42.16	2	0.861988	0.223687	0.893053	0.0586294
tr|Q68FX3|Q68FX3_RAT	DEAD (Asp-Glu-Ala-Asp) box polypeptide 19a OS=Rattus norvegicus GN=Ddx19a PE=1 SV=1	12.63	34.1	7	0.9424	0.768653	14.19	48.33	9	0.885258	0.0968728	15.18	40.59	7	0.851617	0.0531293	0.893091	0.0458956
tr|Q566E4|Q566E4_RAT	Heterogeneous nuclear ribonucleoprotein R OS=Rattus norvegicus GN=Hnrnpr PE=1 SV=1	8.25	20.57	4	1.0237	0.967338	11.59	32.75	6	0.86375	0.664313	13.74	32.28	7	0.792776	0.641705	0.89341	0.118286
tr|A0A0G2KB74|A0A0G2KB74_RAT	Disco-interacting protein 2 homolog A OS=Rattus norvegicus GN=Dip2a PE=1 SV=1	10.23	22.71	6	1.13387	0.556142	15.24	21.88	9	0.705427	0.236925	15.1	26.04	9	0.841461	0.324619	0.893586	0.218926
tr|D3ZMY7|D3ZMY7_RAT	5'-nucleotidase, cytosolic II OS=Rattus norvegicus GN=Nt5c2 PE=1 SV=3	8.16	22.01	5	0.719615	0.121791	5.26	26.28	3	1.07757	0.58836	5.13	28.67	3	0.884888	0.802412	0.894026	0.179154
tr|B2RYS6|B2RYS6_RAT	Hypoxanthine phosphoribosyltransferase OS=Rattus norvegicus GN=Prtfdc1 PE=1 SV=1	9.72	44	5	1.08691	0.693935	8.59	37.78	4	0.803406	0.0368727	8.22	34.22	4	0.792074	0.0282041	0.894129	0.167047
tr|D3ZD11|D3ZD11_RAT	Signal peptidase complex subunit 2 OS=Rattus norvegicus GN=Spcs2 PE=1 SV=1	4.02	34.96	2	0.80508	0.696535	4.05	43.36	2	0.867221	0.386136	4.1	41.15	2	1.0113	0.903368	0.894535	0.105791
tr|G3V8Y9|G3V8Y9_RAT	Glutamate receptor 3 OS=Rattus norvegicus GN=Gria3 PE=1 SV=3	6.55	18.58	3	1.03997	0.892434	8.72	20.72	5	0.995152	0.989499	7.6	26.24	4	0.649211	0.311771	0.894777	0.213844
sp|Q6AYB5|SRP54_RAT	Signal recognition particle 54 kDa protein OS=Rattus norvegicus GN=Srp54 PE=2 SV=1	6.03	17.46	3	1.05294	0.969796	8.84	21.63	5	0.698978	0.470579	6.04	28.97	3	0.93307	0.794307	0.894995	0.180025
sp|P97878|EXOC5_RAT	Exocyst complex component 5 OS=Rattus norvegicus GN=Exoc5 PE=1 SV=1	6.55	30.08	4	1.048	0.82228	11.48	32.63	6	0.777222	0.357877	9.59	33.76	5	0.860955	0.402824	0.895391	0.138633
tr|G3V6N2|G3V6N2_RAT	Transmembrane emp24 protein transport domain containing 4 (Predicted), isoform CRA_b OS=Rattus norvegicus GN=Tmed4 PE=1 SV=3	6.47	49.34	4	0.945835	0.678148	6.63	37.44	3	0.876223	0.69936	7.2	57.27	4	0.864931	0.682349	0.895663	0.0438153
sp|Q4FZT0|STML2_RAT	Stomatin-like protein 2, mitochondrial OS=Rattus norvegicus GN=Stoml2 PE=1 SV=1	12.9	47.59	7	0.888602	0.653132	13.13	36.26	7	0.963036	0.906778	11.35	49.86	6	0.835997	0.660191	0.895878	0.0638315
sp|P0C5H9|MANF_RAT	Mesencephalic astrocyte-derived neurotrophic factor OS=Rattus norvegicus GN=Manf PE=1 SV=1	9.09	60.89	5	0.836871	0.394163	10.13	51.4	5	0.915053	0.46287	14.09	46.93	7	0.938551	0.572288	0.896825	0.0532347
sp|Q62844|FYN_RAT	Tyrosine-protein kinase Fyn OS=Rattus norvegicus GN=Fyn PE=1 SV=1	12.9	31.84	7	1.06547	0.514721	11.01	29.42	7	0.745707	0	11.74	32.59	9	0.881048	0.377687	0.897407	0.160507
sp|P60123|RUVB1_RAT	RuvB-like 1 OS=Rattus norvegicus GN=Ruvbl1 PE=1 SV=1	22.54	45.18	11	0.946903	0.603895	19.85	34.43	10	0.641317	0.281679	24.01	47.81	12	1.1042	0.0644981	0.897474	0.235368
tr|F1M949|F1M949_RAT	Cytoskeleton-associated protein 5 OS=Rattus norvegicus GN=Ckap5 PE=1 SV=3	38.33	31.21	21	1.08463	0.520599	46.85	32.21	24	0.880256	0.222738	46.08	40.69	24	0.728012	0.00987843	0.897631	0.178941
tr|A0A0G2K6X9|A0A0G2K6X9_RAT	Adenosine kinase OS=Rattus norvegicus GN=Adk PE=1 SV=1	15.27	36.72	9	0.849146	0.357989	14.4	36.48	7	0.791158	0.203725	13.03	34.74	7	1.05456	0.582781	0.898288	0.138407
tr|Q5BJN3|Q5BJN3_RAT	Tia1 cytotoxic granule-associated RNA-binding protein-like 1 OS=Rattus norvegicus GN=Tial1 PE=1 SV=1	7.06	21.68	4	0.976767	0.885337	6.31	28.06	4	0.903508	0.647777	7.97	30.36	5	0.814802	0.557509	0.898359	0.0811048
tr|Q6IN37|Q6IN37_RAT	GM2 ganglioside activator OS=Rattus norvegicus GN=Gm2a PE=1 SV=1	2.53	25.63	2	0.841969	0.506673	4.48	32.16	2	0.994186	0.966213	3.58	29.15	2	0.859733	0.465354	0.898629	0.0832297
tr|Q6IRG9|Q6IRG9_RAT	AP-3 complex subunit mu-1 OS=Rattus norvegicus GN=Ap3m1 PE=1 SV=1	9.47	31.58	5	0.836592	0.59846	12.36	51.2	6	0.905613	0.505944	12.01	44.26	6	0.954117	0.823127	0.898774	0.0590599
tr|D4ABN3|D4ABN3_RAT	Synaptojanin-1 OS=Rattus norvegicus GN=Synj1 PE=1 SV=3	61.26	43.55	34	0.907414	0.376966	57.56	47.6	30	0.958206	0.715159	58.71	48.36	30	0.831938	0.00747546	0.899186	0.0635346
sp|Q5XIE6|HIBCH_RAT	3-hydroxyisobutyryl-CoA hydrolase, mitochondrial OS=Rattus norvegicus GN=Hibch PE=1 SV=2	12.69	39.48	7	0.856885	0.469775	18.37	48.57	9	0.988027	0.942432	14.67	51.17	8	0.853886	0.503506	0.899599	0.0765956
tr|D3ZPP2|D3ZPP2_RAT	ADP-ribosylation factor-like GTPase 8A OS=Rattus norvegicus GN=Arl8a PE=1 SV=1	8.37	56.45	5	0.7446	0.224723	8.26	25.27	5	0.971405	0.867157	6.22	31.18	3	0.983748	0.833618	0.899918	0.13465
sp|Q63538|MK12_RAT	Mitogen-activated protein kinase 12 OS=Rattus norvegicus GN=Mapk12 PE=1 SV=1	4.27	23.16	3	0.931586	0.800517	3.23	19.35	3	0.9451	0.838603	6.19	18.26	4	0.824246	0.301342	0.900311	0.0662199
sp|P62890|RL30_RAT	60S ribosomal protein L30 OS=Rattus norvegicus GN=Rpl30 PE=3 SV=2	13.79	72.17	7	0.994545	0.955168	11.74	77.39	6	0.834748	0.612505	11.67	76.52	7	0.871987	0.763373	0.900427	0.0836082
sp|Q5FVJ0|RUFY3_RAT	Protein RUFY3 OS=Rattus norvegicus GN=Rufy3 PE=1 SV=1	39.74	64.61	21	0.997665	0.9655	44.86	69.94	23	0.848497	0.316357	44.76	73.35	21	0.855485	0.360315	0.900549	0.0841776
sp|O35889|AFAD_RAT	Afadin OS=Rattus norvegicus GN=Afdn PE=1 SV=1	11.06	27.45	6	0.896408	0.534978	6.47	23.84	4	1.03149	0.896901	7.82	18.7	5	0.775611	0.840427	0.901171	0.128009
tr|G3V7G0|G3V7G0_RAT	Cytoplasmic dynein 1 light intermediate chain 1 OS=Rattus norvegicus GN=Dync1li1 PE=1 SV=1	28.88	48.18	14	0.810973	0.0694162	31.75	50.1	16	0.944393	0.71204	34.07	51.63	17	0.948514	0.785241	0.901293	0.078247
tr|A0A0H2UHP1|A0A0H2UHP1_RAT	Retinal dehydrogenase 1 OS=Rattus norvegicus GN=Aldh1a1 PE=1 SV=1	25.05	42.61	13	0.864882	0.136346	24.12	35.89	13	0.903914	0.133584	21.65	36.66	11	0.935155	0.668169	0.901317	0.0352085
sp|P35465|PAK1_RAT	Serine/threonine-protein kinase PAK 1 OS=Rattus norvegicus GN=Pak1 PE=1 SV=3	26.51	47.43	14	0.908813	0.707405	35.83	45.96	18	0.89324	0.147961	31.37	40.44	18	0.904368	0.222336	0.90214	0.00802167
tr|D4A5L9|D4A5L9_RAT	Similar to Cytochrome c, somatic OS=Rattus norvegicus GN=LOC679794 PE=3 SV=1	19.43	64.76	10	1.07778	0.341954	23.02	72.38	13	0.86913	0.115885	24.17	72.38	12	0.760015	0.0191606	0.902307	0.161457
sp|P27139|CAH2_RAT	Carbonic anhydrase 2 OS=Rattus norvegicus GN=Ca2 PE=1 SV=2	25.22	67.31	13	0.890951	0.165131	21.41	57.69	11	0.827519	0.112466	20.06	57.69	11	0.990001	0.922946	0.902823	0.0818891
tr|Q5RKH2|Q5RKH2_RAT	Galactokinase 1 OS=Rattus norvegicus GN=Galk1 PE=1 SV=1	18.16	33.93	9	1.05086	0.890115	12.16	25.77	6	0.9026	0.244146	14.28	39.03	7	0.755409	0.513444	0.902956	0.147726
tr|A0A0G2QC04|A0A0G2QC04_RAT	Plastin 1 OS=Rattus norvegicus GN=Pls1 PE=1 SV=1	23.67	35.24	12	1.0308	0.808026	24.43	38.25	13	0.85963	0.350258	24.56	36.35	12	0.818889	0.0773309	0.903106	0.112447
tr|G3V9N7|G3V9N7_RAT	Protein kinase C and casein kinase substrate in neurons 3 OS=Rattus norvegicus GN=Pacsin3 PE=1 SV=3	13.24	44.34	7	0.949933	0.528836	14.24	48.11	7	0.847179	0.0681728	16.07	45.05	8	0.913459	0.558717	0.903523	0.0520926
tr|F8WG91|F8WG91_RAT	ADP-ribosylation factor-like protein 3 OS=Rattus norvegicus GN=Arl3 PE=1 SV=2	9.74	39.25	5	0.976012	0.862323	8.16	50	4	0.893078	0.534952	6.22	27.42	4	0.842444	0.117649	0.903845	0.0674319
tr|D4AE00|D4AE00_RAT	AP-3 complex subunit beta OS=Rattus norvegicus GN=Ap3b2 PE=1 SV=1	27.74	33.83	14	0.972685	0.687764	22.71	35.67	12	0.90258	0.646994	21.7	33.36	11	0.836947	0.0636349	0.904071	0.0678816
tr|G3V7A5|G3V7A5_RAT	Low density lipoprotein receptor, isoform CRA_a OS=Rattus norvegicus GN=Ldlr PE=1 SV=1	5.33	24.23	4	0.956896	0.844344	5.25	13.65	3	0.907106	0.739609	2.54	24.57	2	0.848656	0.458012	0.90422	0.0541777
tr|Q4KLL7|Q4KLL7_RAT	Vacuolar protein sorting 4 homolog B OS=Rattus norvegicus GN=Vps4b PE=1 SV=1	10.02	31.53	5	1.02794	0.918455	8.59	35.36	6	0.801566	0.12096	8.83	32.43	5	0.88564	0.425952	0.905048	0.114428
tr|D3ZXA6|D3ZXA6_RAT	Pyruvate dehydrogenase phosphatase regulatory subunit OS=Rattus norvegicus GN=Pdpr PE=1 SV=1	13.73	29.61	7	0.753215	0.374117	17.83	21.87	9	0.940089	0.400422	9.96	18	5	1.02196	0.728088	0.905087	0.137748
tr|D3ZMX6|D3ZMX6_RAT	Syntrophin, beta 2 OS=Rattus norvegicus GN=Sntb2 PE=1 SV=3	10.59	31.42	5	0.846018	0.621651	8.28	30.27	5	0.908422	0.356951	8.51	49.23	4	0.961332	0.885767	0.905257	0.057722
sp|Q5I0P2|GCSH_RAT	Glycine cleavage system H protein, mitochondrial OS=Rattus norvegicus GN=Gcsh PE=2 SV=1	4.03	34.12	2	0.863706	0.946948	4.09	50	2	0.973974	0.847668	4.02	37.06	2	0.878717	0.447833	0.905465	0.0598029
tr|G3V9N0|G3V9N0_RAT	Polyadenylate-binding protein OS=Rattus norvegicus GN=Pabpc4 PE=1 SV=2	17.6	34.32	10	0.981236	0.935238	18.8	31.37	9	0.991518	0.983441	22.28	26.86	12	0.744623	0.266638	0.905792	0.139671
tr|M0RBS9|M0RBS9_RAT	Sorting nexin family member 27, isoform CRA_a OS=Rattus norvegicus GN=Snx27 PE=1 SV=1	16.46	44.71	8	0.965874	0.836809	22.31	43.04	12	0.92003	0.523907	23.59	41.37	12	0.832954	0.47238	0.906286	0.0675176
sp|Q5XI64|ABHD6_RAT	Monoacylglycerol lipase ABHD6 OS=Rattus norvegicus GN=Abhd6 PE=1 SV=1	4	13.95	2	1.04639	0	6	16.91	3	0.783115	0.321399	6.03	26.41	3	0.889478	0.687804	0.906326	0.132441
sp|Q62991|SCFD1_RAT	Sec1 family domain-containing protein 1 OS=Rattus norvegicus GN=Scfd1 PE=1 SV=1	19.46	26.84	10	0.753372	0.431383	14.13	29.98	8	0.958056	0.556894	14.15	29.98	7	1.00813	0.927527	0.906519	0.134972
tr|D4A4P4|D4A4P4_RAT	FAD synthase OS=Rattus norvegicus GN=Flad1 PE=1 SV=2	4.03	36.73	2	1.08437	0.566989	8.1	30.82	5	0.805824	0.507734	4.57	22.24	2	0.829515	0.699356	0.90657	0.154435
tr|M0RCA6|M0RCA6_RAT	Advillin OS=Rattus norvegicus GN=Avil PE=4 SV=1	25.51	36.26	12	0.794559	0.00077434	25.85	34.55	13	0.953496	0.683521	21.47	31.14	12	0.974229	0.930115	0.907428	0.0982958
tr|A0A0G2K8H0|A0A0G2K8H0_RAT	Caprin-1 OS=Rattus norvegicus GN=Caprin1 PE=1 SV=1	7.83	19.44	5	0.699197	0.235383	6.4	24.03	4	1.04763	0.775173	4.23	26.11	2	0.975823	0	0.907551	0.183977
sp|Q5XID1|CPIN1_RAT	Anamorsin OS=Rattus norvegicus GN=Ciapin1 PE=1 SV=1	8.11	37.54	4	0.875732	0.235346	10.32	42.72	5	1.01807	0.876648	10.15	41.42	5	0.829124	0.273879	0.907643	0.0984335
tr|Q5BJZ3|Q5BJZ3_RAT	Nicotinamide nucleotide transhydrogenase OS=Rattus norvegicus GN=Nnt PE=1 SV=1	41.58	34.9	20	0.948721	0.543179	44.29	38.67	22	0.907455	0.0174193	45.23	36.1	23	0.866942	0.0539867	0.907706	0.0408899
tr|B1H248|B1H248_RAT	Vacuolar protein-sorting-associated protein 36 OS=Rattus norvegicus GN=Vps36 PE=1 SV=1	9.07	47.41	5	0.944101	0.886091	11.88	45.34	7	0.949627	0.645962	11.08	49.22	5	0.832115	0.317201	0.908614	0.0663083
sp|Q5PQJ6|P5CR3_RAT	Pyrroline-5-carboxylate reductase 3 OS=Rattus norvegicus GN=Pycr3 PE=2 SV=1	10.01	39.05	6	1.05495	0.482997	4.06	35.4	2	0.95406	0.723332	10.08	35.77	5	0.719221	0.493917	0.909409	0.172259
tr|B5DEJ1|B5DEJ1_RAT	SLIT-ROBO Rho GTPase-activating protein 2 OS=Rattus norvegicus GN=Srgap2 PE=1 SV=1	9.21	29.25	5	0.995942	0.978488	8.48	29.6	4	0.837184	0.425835	14.09	24.13	7	0.895218	0.397644	0.909448	0.08033
sp|Q641Y5|ATG7_RAT	Ubiquitin-like modifier-activating enzyme ATG7 OS=Rattus norvegicus GN=Atg7 PE=2 SV=1	6.19	25.79	3	0.872774	0.73449	7.58	26.79	4	0.742956	0.383384	9.72	20.77	6	1.11275	0.767736	0.909492	0.187609
tr|D3Z9N6|D3Z9N6_RAT	Versican core protein OS=Rattus norvegicus GN=Vcan PE=4 SV=2	23.97	19.76	13	1.13036	0	24.92	22.4	13	0.660221	0.148873	26.94	21.05	14	0.938181	0.566768	0.909587	0.236371
tr|Q68FT7|Q68FT7_RAT	Phenylalanyl-tRNA synthetase, beta subunit OS=Rattus norvegicus GN=Farsb PE=1 SV=1	19.59	37.35	10	0.827464	0.177206	21.31	34.63	11	0.972953	0.774276	20.22	37.35	10	0.928501	0.592938	0.909639	0.0745561
sp|Q6AYG3|PRUN1_RAT	Exopolyphosphatase PRUNE1 OS=Rattus norvegicus GN=Prune1 PE=1 SV=1	16.52	32.82	9	0.915859	0.754093	13.27	28.19	7	0.899233	0.692622	14.15	30.84	7	0.914177	0.792772	0.909756	0.00915203
tr|B4F7A9|B4F7A9_RAT	Casein kinase 2 alpha 2 OS=Rattus norvegicus GN=Csnk2a2 PE=1 SV=1	9.81	27.71	6	0.866285	0.393146	7.2	31.71	4	0.963691	0.784105	11.65	48.86	6	0.899602	0.537745	0.909859	0.0495065
sp|O70593|SGTA_RAT	Small glutamine-rich tetratricopeptide repeat-containing protein alpha OS=Rattus norvegicus GN=Sgta PE=1 SV=1	15.5	40.76	8	0.905699	0.504168	18.6	30.89	10	0.904	0.490922	20.72	36.62	10	0.920512	0.608462	0.91007	0.0090828
tr|D4A3E2|D4A3E2_RAT	Aminopeptidase-like 1 OS=Rattus norvegicus GN=Npepl1 PE=1 SV=2	2.27	13.35	2	0.747768	0.672875	5.84	30.1	4	1.01771	0.958389	2.92	23.54	2	0.966683	0.793546	0.910721	0.143409
tr|A0A0G2K2V5|A0A0G2K2V5_RAT	Exocyst complex component 1 OS=Rattus norvegicus GN=Exoc1 PE=1 SV=1	5.33	25.1	3	0.878736	0.729483	6.28	21.78	3	0.874372	0.427408	6.08	33.29	3	0.979886	0.920859	0.910998	0.0596984
sp|P30009|MARCS_RAT	Myristoylated alanine-rich C-kinase substrate OS=Rattus norvegicus GN=Marcks PE=1 SV=2	14.08	44.66	7	0.764537	0.647719	16.18	45.63	8	1.04581	0.859035	18.11	53.07	9	0.923301	0.470918	0.911216	0.141025
tr|A0A0G2JY22|A0A0G2JY22_RAT	Disco-interacting protein 2 homolog B OS=Rattus norvegicus GN=Dip2b PE=1 SV=1	40.38	31.53	20	0.798506	0.201981	45.67	31.4	23	0.919476	0.261965	46.09	31.53	25	1.01596	0.840958	0.911315	0.108958
sp|Q6PST4|ATLA1_RAT	Atlastin-1 OS=Rattus norvegicus GN=Atl1 PE=1 SV=1	27.12	44.09	13	0.935141	0.485768	28.65	47.13	15	0.940603	0.616952	24.79	36.74	12	0.858828	0.012675	0.911524	0.0457178
tr|G3V721|G3V721_RAT	WW domain binding protein 2, isoform CRA_b OS=Rattus norvegicus GN=Wbp2 PE=1 SV=1	9.11	28.63	4	0.898119	0.814164	12.5	26.72	7	0.922556	0.577047	11.28	28.63	6	0.915043	0.595981	0.911906	0.0125168
tr|A0A0G2JVG4|A0A0G2JVG4_RAT	Peroxisomal trans-2-enoyl-CoA reductase OS=Rattus norvegicus GN=Pecr PE=1 SV=1	8.97	26.56	6	0.932492	0.519482	9.58	26.89	5	0.987565	0.958049	8.41	33.11	5	0.815681	0.55395	0.911913	0.0877706
sp|P14056|ARAF_RAT	Serine/threonine-protein kinase A-Raf OS=Rattus norvegicus GN=Araf PE=1 SV=1	10.75	37.91	6	0.780857	0.520585	5.36	21.19	3	0.961666	0.822807	4.81	22.52	3	0.993887	0.96415	0.912137	0.114827
tr|A0A0G2JSS9|A0A0G2JSS9_RAT	Atlastin-3 OS=Rattus norvegicus GN=Atl3 PE=1 SV=1	8.26	22.95	5	0.892929	0.21315	9.95	24.81	5	0.872284	0.136806	10.95	27.05	6	0.971477	0.838317	0.91223	0.0523377
sp|Q64361|LXN_RAT	Latexin OS=Rattus norvegicus GN=Lxn PE=1 SV=1	12.32	41.7	6	0.909327	0.357338	10.03	27.8	5	0.9336	0.4934	10	30.94	5	0.893776	0.166541	0.912234	0.0200707
sp|Q66H20|PTBP2_RAT	Polypyrimidine tract-binding protein 2 OS=Rattus norvegicus GN=Ptbp2 PE=1 SV=1	8.56	22.98	5	0.803067	0.306422	9.2	22.98	4	0.991765	0.917659	9.67	29.76	6	0.942041	0.525575	0.912291	0.0978033
sp|Q64548|RTN1_RAT	Reticulon-1 OS=Rattus norvegicus GN=Rtn1 PE=1 SV=1	21.46	30.5	10	0.896517	0.355707	27.68	29.21	16	0.893667	0.247758	28.59	34.75	15	0.946836	0.308787	0.91234	0.0299086
tr|G3V8T5|G3V8T5_RAT	RuvB-like helicase OS=Rattus norvegicus GN=Ruvbl2 PE=1 SV=1	14.81	45.57	9	1.14582	0.210482	20.02	44.28	10	0.646767	0.0173336	19.94	49.03	10	0.945397	0.865118	0.91266	0.25113
sp|B0BNM9|GLTP_RAT	Glycolipid transfer protein OS=Rattus norvegicus GN=GLTP PE=2 SV=1	18.49	56.94	10	0.898785	0.188793	19.02	56.94	10	0.994132	0.949077	20.18	49.28	10	0.845269	0.0945703	0.912729	0.0754043
sp|Q05175|BASP1_RAT	Brain acid soluble protein 1 OS=Rattus norvegicus GN=Basp1 PE=1 SV=2	28.49	84.55	14	0.897642	0.782206	28.13	84.55	14	1.03032	0.844005	26.3	80.45	13	0.810362	0.421614	0.912773	0.110755
sp|Q80Z30|PPM1E_RAT	Protein phosphatase 1E OS=Rattus norvegicus GN=Ppm1e PE=1 SV=1	6.12	23.33	3	1.09538	0.621179	8.44	20.93	4	0.795406	0.615472	8.21	31.6	4	0.847801	0.327873	0.912862	0.160221
tr|D3ZLC1|D3ZLC1_RAT	Lamin B2 OS=Rattus norvegicus GN=Lmnb2 PE=1 SV=2	12.05	33.77	6	0.851381	0.157383	13.16	43.18	7	1.00455	0.987966	21.77	57.31	10	0.882899	0.165148	0.912943	0.0808839
tr|A0A0G2K777|A0A0G2K777_RAT	Ras homolog family member T1 OS=Rattus norvegicus GN=Rhot1 PE=1 SV=1	11.54	38.16	5	0.970485	0.847411	14.4	35.37	7	0.833376	0.620709	12.59	31.91	6	0.935056	0.825621	0.912972	0.0711726
tr|F1LMD9|F1LMD9_RAT	Cyclin-G-associated kinase OS=Rattus norvegicus GN=Gak PE=1 SV=1	7.32	15.86	4	0.735733	0.526916	14.72	29.58	8	0.995882	0.961811	10.89	28.89	6	1.00845	0.977416	0.913356	0.153954
sp|P24473|GSTK1_RAT	Glutathione S-transferase kappa 1 OS=Rattus norvegicus GN=Gstk1 PE=1 SV=3	11.93	51.77	7	1.07528	0.555459	12.68	60.62	7	0.819844	0.172551	16.36	62.39	8	0.845506	0.222883	0.913543	0.140655
tr|A0A0G2K9V6|A0A0G2K9V6_RAT	Threonine--tRNA ligase, cytoplasmic OS=Rattus norvegicus GN=Tars PE=1 SV=1	20.37	46.95	11	0.948896	0.829936	25.25	38.78	13	0.930671	0.641974	23.36	45.98	11	0.861293	0.229652	0.91362	0.0462238
tr|A0A0H2UHG4|A0A0H2UHG4_RAT	Cyclin-dependent kinase 18 OS=Rattus norvegicus GN=Cdk18 PE=1 SV=1	18.3	33.12	9	1.02062	0.796335	22.94	55.05	12	0.844446	0.0708021	22.89	49.68	12	0.876229	0.137282	0.913766	0.093896
sp|Q5HZY0|UBXN4_RAT	UBX domain-containing protein 4 OS=Rattus norvegicus GN=Ubxn4 PE=1 SV=1	6.02	20.36	3	0.89441	0.402205	8.01	22.13	4	0.886497	0.453925	8.18	26.09	4	0.960563	0.831747	0.913823	0.0406707
tr|F1M6W2|F1M6W2_RAT	Endoplasmic reticulum metallopeptidase 1 OS=Rattus norvegicus GN=Ermp1 PE=1 SV=1	15.8	22.27	9	0.920763	0.711622	18.29	21.49	9	0.942661	0.666176	16.05	21.05	8	0.87845	0.700809	0.913958	0.0326421
sp|P40241|CD9_RAT	CD9 antigen OS=Rattus norvegicus GN=Cd9 PE=1 SV=2	11.43	31.42	8	0.806635	0.155569	12.35	33.63	7	1.00675	0.959244	11.12	33.63	7	0.928975	0.596399	0.914122	0.100883
tr|D3ZG95|D3ZG95_RAT	Mitochondrial calcium uptake family, member 3 OS=Rattus norvegicus GN=Micu3 PE=4 SV=2	2.46	21.04	2	0.876761	0.724836	5.62	30.46	3	0.894019	0.326004	8.76	24.85	5	0.97258	0.872441	0.914453	0.0510733
sp|O35263|PA1B3_RAT	Platelet-activating factor acetylhydrolase IB subunit gamma OS=Rattus norvegicus GN=Pafah1b3 PE=2 SV=1	3.95	15.95	3	1.14611	0.547545	2.53	25.86	2	0.98151	0.917357	7.49	26.72	4	0.615795	0.389864	0.914472	0.271439
tr|A0A0H2UHR7|A0A0H2UHR7_RAT	Filamin-C OS=Rattus norvegicus GN=Flnc PE=1 SV=1	68.29	39.81	40	0.92116	0.541529	62.26	37.8	36	0.859427	0.0464988	85.27	41.4	46	0.962902	0.558351	0.914496	0.0520582
tr|M0RAP5|M0RAP5_RAT	SET-binding factor 1 OS=Rattus norvegicus GN=Sbf1 PE=1 SV=1	28.84	27.42	15	0.979233	0.778995	32.02	29.11	18	0.889173	0.298744	30.6	26.78	18	0.876098	0.156043	0.914835	0.0561524
sp|Q5XIK2|TMX2_RAT	Thioredoxin-related transmembrane protein 2 OS=Rattus norvegicus GN=Tmx2 PE=2 SV=1	7.56	28.47	4	0.80632	0.594834	6.88	43.05	4	1.0145	0.928972	7.1	31.53	4	0.923939	0.856017	0.91492	0.104383
tr|D3ZA93|D3ZA93_RAT	Acyl-CoA thioesterase 13 OS=Rattus norvegicus GN=Acot13 PE=1 SV=1	3.7	39.29	3	0.921045	0.696158	4	25.71	3	0.912682	0.787023	4.03	35	3	0.911124	0.634416	0.91495	0.00533514
tr|D3ZDB9|D3ZDB9_RAT	NmrA-like family domain-containing protein 1 OS=Rattus norvegicus GN=Nmral1 PE=1 SV=2	6.41	23.93	3	0.888909	0.51914	5.8	40.66	3	0.975439	0.748625	6.49	42.95	3	0.881387	0.466591	0.915245	0.052265
sp|Q4V8F9|HSDL2_RAT	Hydroxysteroid dehydrogenase-like protein 2 OS=Rattus norvegicus GN=Hsdl2 PE=2 SV=1	14.86	24.81	8	1.05907	0.699348	13.93	34.54	7	0.870019	0.439226	12.35	26.15	6	0.817005	0.584769	0.915365	0.127245
tr|F1M853|F1M853_RAT	Ribosome-binding protein 1 OS=Rattus norvegicus GN=Rrbp1 PE=1 SV=3	61.57	45.22	33	0.983026	0.928046	58.1	50.17	30	0.78082	0.0348812	65.47	51.48	36	0.984533	0.87988	0.916127	0.117181
sp|O88763|PK3C3_RAT	Phosphatidylinositol 3-kinase catalytic subunit type 3 OS=Rattus norvegicus GN=Pik3c3 PE=1 SV=1	8.6	26.72	4	0.935641	0.890041	6.68	24.35	3	0.870182	0.155531	6.84	21.76	5	0.943065	0.516559	0.916296	0.0401079
sp|P60841|ENSA_RAT	Alpha-endosulfine OS=Rattus norvegicus GN=Ensa PE=1 SV=1	3.38	38.84	2	1.00899	0.968606	4.01	31.4	2	0.65965	0.282758	2.96	19.01	2	1.08086	0	0.916501	0.225323
sp|Q9ERH3|WDR7_RAT	WD repeat-containing protein 7 OS=Rattus norvegicus GN=Wdr7 PE=1 SV=1	40.67	29.37	22	0.903853	0.574786	43.21	32.12	23	0.907765	0.16471	40.11	34.54	21	0.938385	0.124214	0.916668	0.0189092
tr|A0A0G2K226|A0A0G2K226_RAT	NudC domain-containing 3 (Fragment) OS=Rattus norvegicus GN=Nudcd3 PE=1 SV=1	4.12	38.25	2	0.776593	0.565731	4.02	28.42	2	0.996234	0.976634	4.09	55.74	2	0.979323	0.877768	0.917383	0.122221
sp|Q498R7|CA123_RAT	UPF0587 protein C1orf123 homolog OS=Rattus norvegicus PE=2 SV=1	6.66	45	3	0.837385	0.401913	4.1	45.63	3	0.787516	0.491032	5.37	44.37	3	1.12767	0.520478	0.917525	0.183695
sp|P62747|RHOB_RAT	Rho-related GTP-binding protein RhoB OS=Rattus norvegicus GN=Rhob PE=1 SV=1	12.79	57.65	7	0.946571	0.678915	16.25	59.18	9	0.965696	0.908161	16.37	59.69	9	0.840821	0.531134	0.917696	0.0672589
tr|Q76IJ9|Q76IJ9_RAT	ELAV-like protein OS=Rattus norvegicus GN=Elavl3 PE=2 SV=1	10.8	28.88	5	0.925317	0.920806	13.9	34.33	7	0.950285	0.560615	10.18	25.89	5	0.878334	0.449248	0.917978	0.0365326
tr|F1LQH9|F1LQH9_RAT	Bcl2-associated athanogene 2 OS=Rattus norvegicus GN=Bag2 PE=4 SV=2	5.7	58.96	4	0.786696	0.123952	3.12	38.68	2	1.05488	0.590817	5.88	39.62	3	0.913107	0.527752	0.918227	0.134165
tr|A0A0G2KAY8|A0A0G2KAY8_RAT	Selenoprotein 15 OS=Rattus norvegicus GN=Selenof PE=1 SV=1	4	32.92	2	0.876812	0	4	50.93	2	0.904589	0.570185	4.06	32.3	2	0.973339	0.952795	0.918247	0.0496916
sp|P04550|PTMS_RAT	Parathymosin OS=Rattus norvegicus GN=Ptms PE=1 SV=2	5.1	23.53	3	0.927248	0.544368	4	26.47	2	0.869948	0.645919	4	22.55	2	0.95868	0.768335	0.918625	0.0449901
tr|G3V6F4|G3V6F4_RAT	O-linked N-acetylglucosamine (GlcNAc) transferase (UDP-N-acetylglucosamine:polypeptide-N-acetylglucosaminyl transferase), isoform CRA_b OS=Rattus norvegicus GN=Ogt PE=1 SV=2	31.43	30.41	16	0.859838	0.115092	27.3	33.11	15	0.982845	0.838331	30.59	28.96	14	0.913555	0.338414	0.918746	0.0616677
sp|Q6AYK6|CYBP_RAT	Calcyclin-binding protein OS=Rattus norvegicus GN=Cacybp PE=1 SV=1	19.29	78.17	9	0.96328	0.898278	21.04	78.6	10	0.855243	0.0565258	17.79	68.12	9	0.938421	0.491454	0.918981	0.0565808
sp|Q9ER24|ATX10_RAT	Ataxin-10 OS=Rattus norvegicus GN=Atxn10 PE=1 SV=1	22.23	53.68	11	0.988397	0.80683	23.81	46.32	12	0.786197	0.230892	23.3	55.58	12	0.982551	0.870869	0.919048	0.115089
tr|A0A0A0MY00|A0A0A0MY00_RAT	Short/branched chain-specific acyl-CoA dehydrogenase, mitochondrial OS=Rattus norvegicus GN=Acadsb PE=1 SV=2	8.42	23.03	4	0.821278	0.238516	7.75	33.05	4	0.863369	0.607654	8.24	23.03	4	1.07343	0.825604	0.919358	0.135078
tr|D4AE06|D4AE06_RAT	Peptidylprolyl isomerase OS=Rattus norvegicus GN=Fkbp15 PE=1 SV=3	9.95	23.18	5	0.775486	0.151495	8.05	22.93	4	0.997383	0.991427	8.6	21.34	5	0.988167	0.93699	0.920345	0.125537
tr|B4F779|B4F779_RAT	Adaptor protein, phosphotyrosine interaction, PH domain and leucine zipper containing 2 OS=Rattus norvegicus GN=Appl2 PE=1 SV=1	12.1	32.48	6	0.873384	0.246564	12.63	33.38	7	0.947177	0.470355	18.28	29.31	9	0.940962	0.543085	0.920507	0.0409283
sp|B1WBW4|ARM10_RAT	Armadillo repeat-containing protein 10 OS=Rattus norvegicus GN=Armc10 PE=1 SV=1	4.65	28.1	3	0.916212	0.589785	9	41.18	5	0.983137	0.808115	9.1	30.72	6	0.863551	0.180424	0.920966	0.0599346
tr|M0R7V3|M0R7V3_RAT	MICOS complex subunit OS=Rattus norvegicus GN=Apoo PE=1 SV=2	7.85	35.86	4	1.0054	0.989597	11.42	62.63	6	0.917197	0.613421	8.35	39.39	4	0.841299	0.105714	0.9213	0.0821295
tr|G3V9K0|G3V9K0_RAT	Cysteinyl-tRNA synthetase OS=Rattus norvegicus GN=Cars PE=1 SV=1	19.04	37.97	10	0.806092	0.120321	14.71	36.63	7	0.970474	0.836	17.6	34.49	9	0.98919	0.892779	0.921919	0.100744
sp|Q62717|CAPS1_RAT	Calcium-dependent secretion activator 1 OS=Rattus norvegicus GN=Cadps PE=1 SV=1	56.5	44.53	27	0.906718	0.638355	61.88	47.32	31	0.882567	0.770135	61.44	48.33	31	0.977006	0.895404	0.922097	0.0490619
tr|D3Z900|D3Z900_RAT	Mitochondrial amidoxime reducing component 2 OS=Rattus norvegicus GN=Marc2 PE=1 SV=2	11.72	29.29	6	1.04113	0.740536	14.76	42.01	7	0.934961	0.65483	14.61	32.54	8	0.791117	0.223599	0.922402	0.125478
sp|Q5XIG8|STRAP_RAT	Serine-threonine kinase receptor-associated protein OS=Rattus norvegicus GN=Strap PE=1 SV=1	22.23	58.57	11	0.713048	0.339449	24.71	60.86	14	1.09719	0.564169	27.43	66.86	13	0.957264	0.602139	0.9225	0.194415
tr|A0A0G2K2L8|A0A0G2K2L8_RAT	Peripheral plasma membrane protein CASK OS=Rattus norvegicus GN=LOC100910506 PE=1 SV=1	23.24	29.7	11	1.0444	0.776515	17.08	35.42	8	0.90475	0.401964	16.99	30.03	9	0.819541	0.214858	0.922898	0.113525
tr|G3V631|G3V631_RAT	RAB guanine nucleotide exchange factor (GEF) 1 (Predicted), isoform CRA_a OS=Rattus norvegicus GN=Rabgef1 PE=1 SV=1	3.35	23.71	2	0.857402	0.235836	6.75	30.28	4	0.99677	0.987071	7.3	17.93	4	0.914681	0.418863	0.922951	0.0700512
sp|Q4KM45|CT027_RAT	UPF0687 protein C20orf27 homolog OS=Rattus norvegicus PE=2 SV=1	2.52	44.25	2	0.916077	0.674097	3.74	43.1	2	0.922585	0.637973	4	32.76	2	0.933197	0.791164	0.923953	0.00864156
tr|Q5U3Z7|Q5U3Z7_RAT	Serine hydroxymethyltransferase OS=Rattus norvegicus GN=Shmt2 PE=1 SV=1	22.78	39.68	12	0.866208	0.168945	21.82	45.24	12	0.863501	0.318356	21.75	32.34	11	1.04259	0.786868	0.924101	0.102626
tr|G3V912|G3V912_RAT	Thioredoxin domain containing 13 OS=Rattus norvegicus GN=Tmx4 PE=1 SV=1	3.93	15.48	3	1.00472	0.965205	8.01	28.57	4	0.830071	0.26147	6.58	27.68	4	0.938137	0.524795	0.924309	0.0881408
tr|A0A0G2JXC3|A0A0G2JXC3_RAT	40S ribosomal protein S21 OS=Rattus norvegicus GN=Rps21 PE=1 SV=1	6.64	54.32	4	0.688031	0.355093	7.94	81.48	4	0.868844	0.279202	7.86	54.32	4	1.21645	0.224716	0.924442	0.268562
tr|M0RDI5|M0RDI5_RAT	Mitochondrial calcium uniporter OS=Rattus norvegicus GN=Mcu PE=1 SV=1	8.13	24.29	4	0.99158	0.981782	4.3	21.14	2	1.11735	0.406463	4.72	28.29	4	0.664654	0.506576	0.924529	0.23368
tr|D4A8A0|D4A8A0_RAT	Carbamoyl-phosphate synthetase 2, aspartate transcarbamylase, and dihydroorotase OS=Rattus norvegicus GN=Cad PE=1 SV=2	11.72	15.92	8	1.02791	0.779044	7.2	13.71	5	1.00372	0.979375	9.21	16.91	6	0.742008	0.273427	0.924547	0.158545
tr|D4A4L4|D4A4L4_RAT	MAP7 domain-containing 2 OS=Rattus norvegicus GN=Map7d2 PE=1 SV=3	18.59	44.06	8	0.970683	0.572802	18.88	42.1	10	0.979984	0.854477	16.4	42.1	8	0.825797	0.162139	0.925488	0.08646
sp|P61203|CSN2_RAT	COP9 signalosome complex subunit 2 OS=Rattus norvegicus GN=Cops2 PE=1 SV=1	17.29	39.05	9	0.900591	0.305898	22.53	46.05	12	0.976865	0.610923	23.67	48.31	12	0.899554	0.0773397	0.92567	0.044339
sp|P81799|NAGK_RAT	N-acetyl-D-glucosamine kinase OS=Rattus norvegicus GN=Nagk PE=1 SV=4	5.35	29.15	3	0.74206	0.212168	9.07	39.94	5	0.974862	0.962162	9.69	34.99	5	1.06009	0.843591	0.925672	0.164625
sp|Q6MG49|BAG6_RAT	Large proline-rich protein BAG6 OS=Rattus norvegicus GN=Bag6 PE=1 SV=2	18.76	24.52	10	0.848355	0.449463	20.85	21.47	11	0.946764	0.635499	16.98	17.98	9	0.983146	0.876611	0.926088	0.0697335
tr|A2IBE0|A2IBE0_RAT	Carbonic anhydrase 14 OS=Rattus norvegicus GN=Car14 PE=1 SV=1	11.45	20.47	7	0.994134	0.959904	10.52	20.47	6	0.981054	0.789837	12.56	20.77	7	0.803319	0.169711	0.926169	0.106592
tr|D3ZIL9|D3ZIL9_RAT	DIS3-like exonuclease 2 OS=Rattus norvegicus GN=Dis3l2 PE=1 SV=2	4.58	16.21	3	1.2507	0	4.91	30.82	3	0.83823	0.412053	4.92	24.32	3	0.690143	0.395425	0.926357	0.290482
sp|P50399|GDIB_RAT	Rab GDP dissociation inhibitor beta OS=Rattus norvegicus GN=Gdi2 PE=1 SV=2	73.71	82.47	39	1.04218	0.567677	67.81	82.47	33	0.86781	0.0574325	72.05	88.09	37	0.869627	0.0664203	0.92654	0.100154
tr|Q6P2A5|Q6P2A5_RAT	GTP:AMP phosphotransferase AK3, mitochondrial OS=Rattus norvegicus GN=Ak3 PE=1 SV=1	13.21	46.26	8	0.955477	0.669677	18.81	69.6	10	0.870881	0.229669	16.72	70.48	8	0.953758	0.582991	0.926706	0.0483531
tr|D4AE96|D4AE96_RAT	Importin 7 OS=Rattus norvegicus GN=Ipo7 PE=1 SV=1	15.85	23.51	8	0.999317	0.995204	9.53	16.57	5	0.927208	0.556624	13.9	16.18	7	0.853706	0.132171	0.926744	0.0728062
tr|B2RYC9|B2RYC9_RAT	Glucosylceramidase OS=Rattus norvegicus GN=Gba PE=1 SV=1	5.02	26.41	4	0.821111	0.158352	2.72	12.82	2	0.9598	0.672267	4.5	18.64	3	1.00038	0.997607	0.927098	0.0940034
sp|P11030|ACBP_RAT	Acyl-CoA-binding protein OS=Rattus norvegicus GN=Dbi PE=1 SV=3	12.6	67.82	7	0.864485	0.28365	11.82	78.16	6	1.00333	0.981099	12.47	73.56	6	0.913907	0.463598	0.92724	0.0703758
tr|Q6P9U0|Q6P9U0_RAT	Serine (Or cysteine) peptidase inhibitor, clade B, member 6a OS=Rattus norvegicus GN=Serpinb6a PE=1 SV=1	17.4	40.9	9	0.770666	0.0733692	16.37	38.52	9	0.949754	0.453822	19.21	41.16	11	1.06269	0.375678	0.927703	0.147254
tr|Q499Q4|Q499Q4_RAT	Phosphoglucomutase-1 OS=Rattus norvegicus GN=Pgm1 PE=1 SV=2	53.49	63.7	26	1.061	0.406142	56.95	64.23	27	0.872612	0.42148	57.18	61.21	28	0.852287	0.18141	0.928633	0.115083
sp|B2RZ37|REEP5_RAT	Receptor expression-enhancing protein 5 OS=Rattus norvegicus GN=Reep5 PE=1 SV=1	11.07	43.92	6	1.06788	0.957909	14.05	37.04	7	0.938531	0.794856	12.36	47.09	6	0.77984	0.337076	0.928749	0.144267
tr|F1M1D5|F1M1D5_RAT	Tubulin folding cofactor D OS=Rattus norvegicus GN=Tbcd PE=1 SV=3	10.55	23.73	5	0.978985	0.929183	13.37	23.64	8	0.8171	0.515301	12.31	16.37	7	0.991927	0.964432	0.929337	0.0974152
tr|M0RB22|M0RB22_RAT	Protein tyrosine phosphatase, receptor type, D OS=Rattus norvegicus GN=Ptprd PE=1 SV=2	25.46	25.86	15	0.867754	0.570727	27.7	32.27	16	1.01116	0.926594	31.9	28.7	16	0.909103	0.629879	0.929338	0.0738126
sp|Q9JLZ1|GLRX3_RAT	Glutaredoxin-3 OS=Rattus norvegicus GN=Glrx3 PE=1 SV=2	24.58	44.51	13	0.90682	0.326166	25.35	61.42	13	0.949546	0.469962	31.9	53.71	16	0.932068	0.403663	0.929478	0.0214803
tr|B2RZ79|B2RZ79_RAT	Iron-sulfur cluster assembly enzyme OS=Rattus norvegicus GN=Iscu PE=1 SV=1	9.18	73.05	5	1.01365	0.899315	13.09	79.04	7	1.02352	0.843203	10.68	73.65	6	0.752168	0.360996	0.929779	0.153895
tr|D3ZFX4|D3ZFX4_RAT	Phosphoacetylglucosamine mutase OS=Rattus norvegicus GN=Pgm3 PE=1 SV=1	32.62	51.45	16	0.966952	0.363851	35.63	52.9	16	0.928017	0.285195	38.5	46.92	21	0.894465	0.192318	0.929811	0.0362771
tr|M0R919|M0R919_RAT	Prefoldin subunit 3 OS=Rattus norvegicus GN=Vbp1 PE=1 SV=2	2.85	25.27	2	1.06244	0	4.15	52.15	4	0.963179	0.80763	4.46	34.41	4	0.763909	0.637328	0.929844	0.152033
tr|D4A1A5|D4A1A5_RAT	Serine/threonine-protein phosphatase 2A 56 kDa regulatory subunit OS=Rattus norvegicus GN=Ppp2r5c PE=1 SV=2	7.79	24.43	4	0.67543	0.266661	8.36	27.86	4	1.17376	0	8.29	32.63	4	0.940539	0	0.929911	0.249338
tr|Q6TUD3|Q6TUD3_RAT	LRRGT00111 OS=Rattus norvegicus GN=Rdh11 PE=1 SV=1	5.14	28.99	4	0.997103	0.970516	12.64	30.47	6	0.936041	0.600617	12.62	29.73	7	0.856602	0.186242	0.929915	0.0704507
tr|G3V762|G3V762_RAT	Tissue specific transplantation antigen P35B (Predicted), isoform CRA_a OS=Rattus norvegicus GN=Tsta3 PE=1 SV=1	10.54	38.94	5	0.927093	0.567531	13.17	36.76	7	0.956163	0.93519	12.33	38.94	7	0.906763	0.340053	0.930006	0.0248281
tr|A0A0G2K5U9|A0A0G2K5U9_RAT	Alpha-actinin-4 OS=Rattus norvegicus GN=Actn4 PE=1 SV=1	68.45	57.74	34	0.87714	0	83.41	62.46	41	1.11861	0	85.23	64.65	43	0.794783	0	0.930177	0.168301
sp|P36876|2ABA_RAT	Serine/threonine-protein phosphatase 2A 55 kDa regulatory subunit B alpha isoform OS=Rattus norvegicus GN=Ppp2r2a PE=2 SV=1	14.12	51.45	7	0.919556	0.621745	20.46	43.4	10	0.937714	0.513195	15	42.51	8	0.933268	0.676014	0.93018	0.00946471
tr|D3ZVR9|D3ZVR9_RAT	Phosphoglucomutase 5 OS=Rattus norvegicus GN=Pgm5 PE=1 SV=3	28.83	57.5	14	1.00387	0.960288	24.72	38.62	12	0.870139	0.454704	30.08	51.68	15	0.916572	0.348202	0.930194	0.0678986
tr|A0A0G2JZH0|A0A0G2JZH0_RAT	Calcium-binding protein 39 OS=Rattus norvegicus GN=Cab39 PE=1 SV=1	10.27	48.97	6	1.0043	0.94834	13.22	53.08	7	0.892127	0.294815	8.67	51.32	4	0.895001	0.264014	0.930476	0.0639503
tr|D4A772|D4A772_RAT	Dystrobrevin OS=Rattus norvegicus GN=Dtna PE=1 SV=3	15.21	31.15	9	0.967343	0.669295	13.49	35.3	7	0.958784	0.693717	14.09	32.27	9	0.865606	0.207775	0.930578	0.0564291
tr|Q5RJK5|Q5RJK5_RAT	Chromobox 3 OS=Rattus norvegicus GN=Cbx3 PE=1 SV=1	4.29	40.44	2	1.08993	0.409253	8.26	51.91	4	0.993927	0.967201	5.45	46.99	3	0.707989	0.196883	0.930616	0.198686
sp|Q9JHY2|SFXN3_RAT	Sideroflexin-3 OS=Rattus norvegicus GN=Sfxn3 PE=2 SV=1	16.99	52.02	9	0.955161	0.479052	19.66	46.73	11	0.858668	0	19.17	52.34	9	0.979231	0	0.93102	0.0638036
sp|Q05140|AP180_RAT	Clathrin coat assembly protein AP180 OS=Rattus norvegicus GN=Snap91 PE=1 SV=1	25.5	20.77	12	0.900307	0.571708	26.22	20.55	14	0.979341	0.862666	20.61	21.2	11	0.91387	0.405689	0.931172	0.0422624
sp|Q3B8Q2|IF4A3_RAT	Eukaryotic initiation factor 4A-III OS=Rattus norvegicus GN=Eif4a3 PE=1 SV=1	14.12	46.23	7	0.899103	0.380713	15.43	49.64	8	0.842449	0.351341	15.32	47.45	8	1.05266	0.807845	0.931403	0.108763
tr|Q5M963|Q5M963_RAT	Cytidine monophosphate N-acetylneuraminic acid synthetase OS=Rattus norvegicus GN=Cmas PE=1 SV=1	8.09	33.33	4	0.93521	0.560224	6	21.3	3	0.983103	0.935462	11.56	41.44	6	0.876799	0.49143	0.931704	0.0532383
sp|P24368|PPIB_RAT	Peptidyl-prolyl cis-trans isomerase B OS=Rattus norvegicus GN=Ppib PE=1 SV=3	20.17	60.19	11	0.99271	0.968708	27.26	71.3	13	0.90781	0.434786	21.83	63.43	12	0.894649	0.626105	0.931723	0.0532247
tr|F1LM66|F1LM66_RAT	Elongation factor Tu GTP-binding domain-containing 2 OS=Rattus norvegicus GN=Eftud2 PE=1 SV=2	9.05	17.92	5	0.644103	0.155503	13.72	19.67	7	1.14362	0.364142	9.68	19.67	5	1.00746	0.951097	0.931727	0.258226
sp|Q6MG11|ATAT_RAT	Alpha-tubulin N-acetyltransferase 1 OS=Rattus norvegicus GN=Atat1 PE=1 SV=1	11.82	29.22	7	0.966695	0.655654	6.41	48.22	3	0.853177	0.46747	5.96	34.2	3	0.975954	0.920911	0.931942	0.0683693
sp|Q5PPH0|ENOPH_RAT	Enolase-phosphatase E1 OS=Rattus norvegicus GN=Enoph1 PE=2 SV=1	6.45	37.16	4	0.912306	0.660091	11.04	25.29	7	0.960354	0.916838	13.14	39.08	7	0.924295	0.622839	0.932318	0.0250083
sp|Q5GFD9|IMPCT_RAT	Protein IMPACT OS=Rattus norvegicus GN=Impact PE=1 SV=1	27.77	52.37	14	0.909489	0.256162	27.67	63.09	13	1.00714	0.889822	26.92	52.37	14	0.880752	0.0729034	0.932461	0.066253
tr|Q5XIF0|Q5XIF0_RAT	Testis expressed gene 264 homolog (Mouse), isoform CRA_a OS=Rattus norvegicus GN=Tex264 PE=1 SV=1	4.36	23.95	2	0.863716	0.222115	5.89	28.8	3	0.893531	0.300243	2.87	12.94	2	1.04153	0.766689	0.932925	0.0952276
tr|D4AEH3|D4AEH3_RAT	Proteasome (Prosome, macropain) 26S subunit, non-ATPase, 7 (Predicted) OS=Rattus norvegicus GN=Psmd7 PE=1 SV=1	13.91	45.94	8	0.815472	0.537565	7.51	33.13	4	0.960973	0.622315	7.79	39.06	4	1.02239	0.854953	0.932946	0.106269
sp|P63249|IPKA_RAT	cAMP-dependent protein kinase inhibitor alpha OS=Rattus norvegicus GN=Pkia PE=1 SV=2	7.08	94.74	4	0.979025	0.795057	6.85	73.68	4	0.96196	0.87914	6.26	73.68	3	0.857982	0.295964	0.932989	0.0655159
tr|D3ZU84|D3ZU84_RAT	Syntaxin-binding protein 5-like OS=Rattus norvegicus GN=Stxbp5l PE=1 SV=3	10.11	29.17	6	0.991653	0.954131	13.35	22.11	7	1.09183	0.456854	7.55	21.28	5	0.716088	0.66279	0.933189	0.194572
sp|Q9WV97|TIM9_RAT	Mitochondrial import inner membrane translocase subunit Tim9 OS=Rattus norvegicus GN=Timm9 PE=1 SV=3	6.85	70.79	3	0.912257	0.32053	8.08	70.79	5	0.997765	0.986186	7.93	74.16	5	0.889777	0.598433	0.933267	0.0569774
sp|Q09073|ADT2_RAT	ADP/ATP translocase 2 OS=Rattus norvegicus GN=Slc25a5 PE=1 SV=3	32.3	64.09	16	0.942571	0.886899	43.53	53.36	21	0.929445	0.851061	40.09	59.4	20	0.9279	0.806834	0.933305	0.0080615
tr|A0A0G2K737|A0A0G2K737_RAT	Thioredoxin-like protein 1 OS=Rattus norvegicus GN=Txnl1 PE=1 SV=1	20.99	47.26	11	0.913913	0.154977	21.44	56.51	11	1.08159	0.309513	20.73	50.34	10	0.804498	0.196564	0.933335	0.139565
sp|Q4G061|EIF3B_RAT	Eukaryotic translation initiation factor 3 subunit B OS=Rattus norvegicus GN=Eif3b PE=1 SV=1	13.25	27.1	6	1.06551	0.702335	17.55	30.74	9	0.903624	0.587906	19.74	35.76	11	0.830918	0.327845	0.933351	0.120088
sp|Q6TUG0|DJB11_RAT	DnaJ homolog subfamily B member 11 OS=Rattus norvegicus GN=Dnajb11 PE=2 SV=1	6.15	25.98	3	0.758598	0.668333	9.43	32.96	5	1.05252	0.886764	8.25	25.7	4	0.989528	0.938835	0.93355	0.154752
sp|O55096|DPP3_RAT	Dipeptidyl peptidase 3 OS=Rattus norvegicus GN=Dpp3 PE=1 SV=2	23.02	35.91	12	0.992911	0.929605	19.85	32.66	10	0.973374	0.639158	20.51	36.18	11	0.834405	0.13162	0.933563	0.0864277
sp|Q4V7C6|GUAA_RAT	GMP synthase [glutamine-hydrolyzing] OS=Rattus norvegicus GN=Gmps PE=1 SV=1	16.51	25.69	8	1.11516	0.456973	14.71	35.79	7	0.848715	0.250975	14.7	29.73	7	0.837304	0.100369	0.933728	0.157232
tr|D4A8D5|D4A8D5_RAT	Filamin B OS=Rattus norvegicus GN=Flnb PE=1 SV=1	45.83	34.52	25	0.900055	0.660258	52.41	32.78	28	0.680487	0.257006	55.74	33.67	30	1.22217	0.158962	0.934238	0.272455
sp|P28572|SC6A9_RAT	Sodium- and chloride-dependent glycine transporter 1 OS=Rattus norvegicus GN=Slc6a9 PE=1 SV=2	9	12.54	5	0.9823	0.82084	10.79	17.55	6	0.847837	0.846781	11.84	13.48	6	0.972587	0.713762	0.934242	0.0749857
tr|Q6MFX9|Q6MFX9_RAT	Myelin-oligodendrocyte glycoprotein OS=Rattus norvegicus GN=Mog PE=1 SV=1	22.09	52.24	11	1.02225	0.848255	23.99	45.71	13	0.920239	0.305467	20.6	44.49	10	0.860363	0.0183248	0.934284	0.0818529
tr|A0A096MJP9|A0A096MJP9_RAT	DNA damage-inducible 1 homolog 2 OS=Rattus norvegicus GN=Ddi2 PE=1 SV=1	9.48	21.6	5	0.994385	0.973405	13.37	14.71	7	0.839198	0.511941	6.14	19.17	3	0.969398	0.696985	0.934327	0.0833258
tr|F1LNM0|F1LNM0_RAT	Disks large homolog 1 OS=Rattus norvegicus GN=Dlg1 PE=1 SV=1	29.28	36.88	15	1.11133	0.663023	28.87	39.3	15	0.804101	0.515156	29.25	46.1	14	0.887568	0.720991	0.934333	0.158864
tr|O89035|O89035_RAT	Mitochondrial dicarboxylate carrier OS=Rattus norvegicus GN=Slc25a10 PE=1 SV=1	6.49	36.71	3	0.998806	0.987789	9.55	43.01	5	0.955439	0.587165	4.68	39.51	2	0.848871	0.0706332	0.934372	0.0771556
tr|F1M403|F1M403_RAT	Ubiquitin-conjugating enzyme E2O OS=Rattus norvegicus GN=Ube2o PE=1 SV=2	29.43	34.45	14	0.957438	0.771195	35.08	35.33	16	0.982119	0.820795	33.37	39.1	15	0.865165	0.171675	0.934907	0.0616462
sp|P50475|SYAC_RAT	Alanine--tRNA ligase, cytoplasmic OS=Rattus norvegicus GN=Aars PE=1 SV=3	57.78	42.77	29	1.02155	0.844275	67.51	52.27	33	0.917889	0.274089	64.94	50.72	31	0.866757	0.406292	0.935397	0.0788653
tr|G3V6M3|G3V6M3_RAT	Synaptotagmin II OS=Rattus norvegicus GN=Syt2 PE=1 SV=1	27.79	50.71	13	0.959553	0.477125	35.21	52.61	17	1.05273	0.281873	35.35	55.92	17	0.793924	0.00323651	0.935401	0.131081
tr|Q66HF3|Q66HF3_RAT	Electron transfer flavoprotein-ubiquinone oxidoreductase, mitochondrial OS=Rattus norvegicus GN=Etfdh PE=1 SV=1	24.22	35.55	12	0.932757	0.246671	25.58	36.85	12	0.911005	0.469085	23.58	31.66	11	0.963174	0.687639	0.935645	0.0262038
sp|Q9R1R4|TDRD7_RAT	Tudor domain-containing protein 7 OS=Rattus norvegicus GN=Tdrd7 PE=1 SV=1	2.62	16.98	3	1.14036	0.71067	16.31	24.17	8	0.748086	0.344601	10.17	26.42	5	0.91858	0.577775	0.935675	0.196695
tr|G3V7X4|G3V7X4_RAT	ATP-binding cassette sub-family A member 2 OS=Rattus norvegicus GN=Abca2 PE=1 SV=2	12.61	15.53	7	1.15125	0.625787	11.18	21.41	9	0.804425	0.0693068	8.69	14.26	6	0.851381	0.147744	0.935684	0.188154
tr|Q5I0M1|Q5I0M1_RAT	Apolipoprotein H OS=Rattus norvegicus GN=Apoh PE=1 SV=1	10.88	36.81	5	0.699103	0.073743	13.65	43.19	7	0.887945	0.405888	8.66	42.32	5	1.2206	0.18467	0.935882	0.264031
tr|D3ZKQ4|D3ZKQ4_RAT	RAB, member RAS oncogene family-like 6 OS=Rattus norvegicus GN=Rabl6 PE=1 SV=1	11.48	23.26	6	1.02298	0.960917	10.36	20.25	5	1.09298	0.49181	8.5	22.85	4	0.691874	0.522883	0.935944	0.214248
sp|Q4QQW3|HOT_RAT	Hydroxyacid-oxoacid transhydrogenase, mitochondrial OS=Rattus norvegicus GN=Adhfe1 PE=1 SV=1	7.52	12.42	4	0.968076	0.798132	8	25.48	4	0.982856	0.896101	4.28	29.98	2	0.857258	0.363197	0.936063	0.0686462
tr|G3V6L4|G3V6L4_RAT	Kinesin-like protein OS=Rattus norvegicus GN=Kif5c PE=1 SV=3	63.48	67.23	29	0.915418	0.291789	62.57	64.19	31	0.998069	0.975412	71.78	65.76	35	0.894748	0.216521	0.936079	0.0546713
tr|Q6P3V8|Q6P3V8_RAT	Eukaryotic translation initiation factor 4A1 OS=Rattus norvegicus GN=Eif4a1 PE=1 SV=1	30.1	52.96	15	1.14401	0.164989	26.73	57.88	14	0.804727	0.0640332	27.9	55.17	14	0.8597	0.399585	0.936147	0.182105
sp|Q566C7|NUDT3_RAT	Diphosphoinositol polyphosphate phosphohydrolase 1 OS=Rattus norvegicus GN=Nudt3 PE=1 SV=1	10.4	57.14	5	0.871495	0.431664	9.24	47.62	5	1.00887	0.985195	8.81	41.67	5	0.929352	0.695996	0.936573	0.0689733
sp|Q80XF7|CXG2_RAT	Gap junction gamma-2 protein OS=Rattus norvegicus GN=Gjc2 PE=1 SV=2	10.22	25.68	5	1.01055	0.97879	8.06	28.18	4	0.93081	0.423594	10.08	29.77	5	0.868462	0.688305	0.936609	0.0712232
tr|D3ZUV3|D3ZUV3_RAT	Eukaryotic translation initiation factor 2A OS=Rattus norvegicus GN=Eif2a PE=1 SV=3	14.59	34.8	8	0.868612	0.178826	15.1	31.24	8	1.04336	0.795016	12.84	34.13	6	0.898179	0.392423	0.936717	0.0935314
tr|F1LPH1|F1LPH1_RAT	Calpastatin OS=Rattus norvegicus GN=Cast PE=1 SV=1	19.26	41.09	10	1.04432	0.471154	14	33.38	7	0.70845	0.547381	16.54	32.12	8	1.05741	0.759174	0.936726	0.197801
sp|Q497B0|NIT2_RAT	Omega-amidase NIT2 OS=Rattus norvegicus GN=Nit2 PE=1 SV=1	14.75	44.2	7	1.16509	0.0383566	18.24	59.78	10	0.867832	0.427222	13.72	42.39	7	0.777719	0.480827	0.936881	0.202707
tr|G3V728|G3V728_RAT	4-nitrophenylphosphatase domain and non-neuronal SNAP25-like protein homolog 1 (C. elegans), isoform CRA_b OS=Rattus norvegicus GN=Nipsnap1 PE=1 SV=1	16.1	42.61	9	0.987025	0.959185	19.19	46.48	10	0.953229	0.622304	21.31	49.3	11	0.870474	0.317006	0.936909	0.0599649
tr|G3V6H0|G3V6H0_RAT	RAB1B, member RAS oncogene family-like OS=Rattus norvegicus GN=LOC100363782 PE=1 SV=1	20.35	59.2	10	1.0077	0.937844	20.88	58.71	12	0.90103	0.52364	23.26	64.18	12	0.903086	0.374317	0.937271	0.0609985
tr|D4A8B3|D4A8B3_RAT	Calcium-transporting ATPase OS=Rattus norvegicus GN=Atp2b2 PE=1 SV=3	80.05	44.7	40	1.06383	0.379375	83.55	48.46	41	0.870264	0.742864	76.06	45.7	39	0.878014	0.537878	0.937369	0.109586
sp|Q924S5|LONM_RAT	Lon protease homolog, mitochondrial OS=Rattus norvegicus GN=Lonp1 PE=2 SV=1	24.79	40.84	13	0.968161	0.77777	40.09	43.58	20	0.891062	0.34001	41.07	45.26	21	0.953993	0.515584	0.937739	0.0410391
sp|Q6AZ50|ATG3_RAT	Ubiquitin-like-conjugating enzyme ATG3 OS=Rattus norvegicus GN=Atg3 PE=2 SV=1	11	31.21	6	0.918952	0.627531	11.33	28.34	6	0.933739	0.761998	10.55	27.71	5	0.960858	0.830478	0.93785	0.0212535
sp|Q6AXR4|HEXB_RAT	Beta-hexosaminidase subunit beta OS=Rattus norvegicus GN=Hexb PE=2 SV=1	8.88	24.77	5	1.04033	0.662978	9.66	21.23	6	0.945317	0.596823	7.22	17.88	4	0.8298	0.421999	0.938482	0.105431
sp|Q6AY65|ARFP2_RAT	Arfaptin-2 OS=Rattus norvegicus GN=Arfip2 PE=2 SV=1	8.48	36.36	4	0.839112	0.222037	4.02	22.87	2	0.85367	0.356022	6.06	27.57	3	1.12281	0	0.938532	0.159759
tr|G3V8G4|G3V8G4_RAT	Brevican core protein OS=Rattus norvegicus GN=Bcan PE=1 SV=1	44.85	48.02	22	0.915802	0.634124	44.08	39.3	21	0.997886	0.976993	44.2	41	21	0.903038	0.18962	0.938909	0.0514727
sp|Q9EQS0|TALDO_RAT	Transaldolase OS=Rattus norvegicus GN=Taldo1 PE=1 SV=2	28.96	56.97	12	0.916701	0.663613	24.26	59.64	11	0.984352	0.723727	22.53	59.35	11	0.915939	0.589112	0.938997	0.0392797
sp|Q9QYU4|CRYM_RAT	Ketimine reductase mu-crystallin OS=Rattus norvegicus GN=Crym PE=1 SV=1	14.92	39.94	8	0.973601	0.858348	10.45	38.02	5	0.851514	0.335453	13.58	41.53	7	0.992027	0.94459	0.939047	0.0763637
tr|E9PSV8|E9PSV8_RAT	Neuronal membrane glycoprotein M6-b OS=Rattus norvegicus GN=Gpm6b PE=4 SV=2	5.35	15.09	4	1.12258	0.888818	4.33	17.74	3	0.915637	0.727113	4.8	20.75	3	0.779002	0.788907	0.939072	0.172983
tr|G3V7S0|G3V7S0_RAT	Folate hydrolase OS=Rattus norvegicus GN=Folh1 PE=1 SV=1	26.41	32.85	13	0.962769	0.468812	31.53	49.73	16	0.995933	0.935771	33.22	44.28	15	0.8586	0.00869887	0.9391	0.0716604
tr|D4A500|D4A500_RAT	HD domain containing 3 (Predicted), isoform CRA_b OS=Rattus norvegicus GN=Hddc3 PE=1 SV=1	5.55	25.7	3	0.972107	0.908066	4.36	27.37	2	0.863567	0.378624	5.94	36.31	3	0.981823	0.911417	0.939166	0.0656507
tr|D4A0C3|D4A0C3_RAT	HID1 domain-containing OS=Rattus norvegicus GN=Hid1 PE=1 SV=2	5.54	16.04	4	0.777641	0	3.83	11.6	3	0.945049	0	4.12	17.34	2	1.09562	0.528932	0.939437	0.159065
tr|D4AD75|D4AD75_RAT	Dpy-19-like C-mannosyltransferase 1 OS=Rattus norvegicus GN=Dpy19l1 PE=1 SV=1	6.99	24.4	4	1.14595	0.600837	7.25	24.53	4	0.781769	0.325315	6.75	17.83	3	0.89189	0.728682	0.93987	0.186772
tr|G3V7T6|G3V7T6_RAT	Splicing factor 3b, subunit 1 OS=Rattus norvegicus GN=Sf3b1 PE=1 SV=1	7.38	18.17	4	1.20727	0.485108	4.83	24.77	3	0.90037	0.394477	8.4	23.24	5	0.712607	0.275955	0.940082	0.24971
tr|F1LX28|F1LX28_RAT	Acyl-CoA thioesterase 11 OS=Rattus norvegicus GN=Acot11 PE=4 SV=3	4.43	19.7	2	0.897223	0.321715	9.77	28.62	5	1.01507	0.853875	6.05	21.55	3	0.909286	0.299294	0.940526	0.0648375
tr|D4A830|D4A830_RAT	Pyrophosphatase (inorganic) 2 OS=Rattus norvegicus GN=Ppa2 PE=1 SV=2	7.18	38.16	4	1.06497	0.443267	13.99	57.24	8	0.885004	0.307428	12.42	51.97	6	0.872569	0.23341	0.940846	0.10767
sp|P24155|THOP1_RAT	Thimet oligopeptidase OS=Rattus norvegicus GN=Thop1 PE=1 SV=4	33.85	43.81	16	0.915895	0.448943	36.2	49.78	17	0.991298	0.912997	36.32	44.4	17	0.916774	0.437676	0.941322	0.0432828
tr|Q5M7T7|Q5M7T7_RAT	Platelet-activating factor acetylhydrolase OS=Rattus norvegicus GN=Pla2g7 PE=2 SV=1	5.53	30.45	3	1.19527	0.209645	5.33	31.82	3	0.898014	0.275412	5.32	25.23	3	0.731389	0.0612041	0.941557	0.234984
tr|D3ZC84|D3ZC84_RAT	Ubiquitin specific peptidase 9, X chromosome (Predicted) OS=Rattus norvegicus GN=Usp9x PE=1 SV=1	40.36	26.74	24	0.905868	0.353935	50.28	29.21	28	0.973547	0.687643	42.51	26.38	27	0.945308	0.742116	0.941575	0.0339936
tr|M0R7F3|M0R7F3_RAT	WAS protein family, member 3 OS=Rattus norvegicus GN=Wasf3 PE=4 SV=2	8.66	20.72	4	0.923175	0.3598	8.1	25.1	4	1.01501	0.877648	6.19	21.12	3	0.887776	0.353437	0.941987	0.0656695
tr|F1LMH0|F1LMH0_RAT	Neuronal-specific septin-3 OS=Rattus norvegicus GN=Sept3 PE=3 SV=1	13.37	34.64	7	0.99154	0.959357	12.72	41.62	7	0.985787	0.931493	12.17	34.08	8	0.848694	0.0682499	0.942007	0.0808623
tr|D3ZC56|D3ZC56_RAT	Dystonin OS=Rattus norvegicus GN=Dst PE=1 SV=3	48	28.91	35	0.658221	0.0501882	46.69	27.94	38	1.14367	0.272732	46.6	29.26	35	1.02416	0.860258	0.942017	0.252934
sp|P48508|GSH0_RAT	Glutamate--cysteine ligase regulatory subunit OS=Rattus norvegicus GN=Gclm PE=1 SV=1	9.61	43.07	5	1.04504	0.60188	8.48	52.19	4	0.95453	0.676302	9.03	46.35	5	0.828257	0.402651	0.942608	0.108881
tr|F1M9V7|F1M9V7_RAT	Aminopeptidase OS=Rattus norvegicus GN=Npepps PE=1 SV=1	73.59	44.57	36	0.98416	0.792268	75.24	50.33	37	0.945326	0.371748	79.16	54.46	40	0.898987	0.0695338	0.942824	0.0426411
tr|G3V6U9|G3V6U9_RAT	Histone-lysine N-methyltransferase OS=Rattus norvegicus GN=Setd3 PE=1 SV=1	7.51	21.14	4	1.08177	0.330222	9.73	28.19	5	0.708398	0.4061	11.37	29.53	5	1.03849	0.804258	0.942886	0.204222
tr|F1LVA9|F1LVA9_RAT	Dedicator of cytokinesis 5 OS=Rattus norvegicus GN=Dock5 PE=1 SV=2	4.67	22.06	4	1.22676	0.189867	10.73	15.58	7	0.727463	0.714833	10.81	15.15	7	0.87446	0.246106	0.942894	0.256587
sp|Q9JHW0|PSB7_RAT	Proteasome subunit beta type-7 OS=Rattus norvegicus GN=Psmb7 PE=1 SV=1	11.47	30.32	6	0.954687	0.570281	8.42	25.63	5	0.948693	0.807354	6.25	25.27	4	0.927002	0.711736	0.943461	0.0145655
tr|G3V6W6|G3V6W6_RAT	Proteasome 26S subunit, ATPase 6 OS=Rattus norvegicus GN=Psmc6 PE=1 SV=1	28.78	55.58	15	1.03541	0.483789	24.11	62.03	12	0.855415	0.425625	25.25	53.1	12	0.939605	0.689106	0.943476	0.0900596
tr|B5DFL0|B5DFL0_RAT	Snta1 protein OS=Rattus norvegicus GN=Snta1 PE=1 SV=1	12.66	33.07	6	0.986081	0.957024	13.86	41.08	7	0.962664	0.86651	14.31	43.09	7	0.881691	0.535388	0.943479	0.0547757
tr|Q568Y8|Q568Y8_RAT	Stathmin-4 OS=Rattus norvegicus GN=Stmn4 PE=1 SV=1	3.44	36.45	2	1.00346	0	3.79	32.51	2	1.06588	0	4.16	31.53	2	0.762129	0	0.943822	0.160415
sp|Q00657|CSPG4_RAT	Chondroitin sulfate proteoglycan 4 OS=Rattus norvegicus GN=Cspg4 PE=1 SV=2	21.88	21.24	14	0.773169	0.39136	20.34	20.72	10	0.924916	0.481484	19.89	19.48	13	1.13422	0.616797	0.944101	0.181287
sp|P62716|PP2AB_RAT	Serine/threonine-protein phosphatase 2A catalytic subunit beta isoform OS=Rattus norvegicus GN=Ppp2cb PE=2 SV=1	20.34	64.08	10	0.966338	0.793204	26.94	64.72	13	0.866055	0.59551	26.48	67.64	14	1.00064	0.998022	0.944345	0.0699375
tr|B2RYT7|B2RYT7_RAT	Haloacid dehalogenase-like hydrolase domain-containing 3 OS=Rattus norvegicus GN=Hdhd3 PE=1 SV=1	6.61	27.89	4	0.923936	0.351	6.65	36.65	4	0.913222	0.559754	8.05	33.47	4	0.996679	0.985759	0.944613	0.0454084
sp|Q4QQV8|CHMP5_RAT	Charged multivesicular body protein 5 OS=Rattus norvegicus GN=Chmp5 PE=2 SV=1	7.16	31.05	4	0.909581	0.218565	6.52	34.25	3	1.03448	0.750503	3.76	24.2	3	0.8901	0.364575	0.944721	0.0783439
tr|B0BMW0|B0BMW0_RAT	RAB14, member RAS oncogene family OS=Rattus norvegicus GN=Rab14 PE=1 SV=1	29.65	89.77	15	0.881457	0.634834	35.97	88.84	18	0.994259	0.921677	32.62	88.84	18	0.95849	0.452255	0.944735	0.0576451
sp|Q2LAM0|FA2H_RAT	Fatty acid 2-hydroxylase OS=Rattus norvegicus GN=Fa2h PE=1 SV=2	6.55	24.19	3	1.03603	0.867423	8.02	26.34	4	0.885298	0.6765	8.15	27.42	4	0.913112	0.547447	0.944812	0.0802078
tr|B1WC61|B1WC61_RAT	Acad9 protein OS=Rattus norvegicus GN=Acad9 PE=1 SV=1	32.32	40.8	15	0.938976	0.632369	36.89	52.16	17	0.957055	0.732946	34.32	48.64	18	0.939147	0.578003	0.945059	0.0103888
sp|Q9QY17|PACN2_RAT	Protein kinase C and casein kinase substrate in neurons 2 protein OS=Rattus norvegicus GN=Pacsin2 PE=1 SV=2	23.74	36.89	11	0.958824	0.72089	25.53	41.6	13	0.982392	0.78996	26.59	37.5	14	0.894104	0.36859	0.945107	0.0457146
tr|Q6IMZ5|Q6IMZ5_RAT	Tropomodulin-1 OS=Rattus norvegicus GN=Tmod1 PE=1 SV=1	5.75	27.3	3	0.756433	0.4209	4.68	35.65	3	1.04965	0.832113	6.29	29.81	3	1.02979	0.885235	0.945291	0.163857
sp|P28037|AL1L1_RAT	Cytosolic 10-formyltetrahydrofolate dehydrogenase OS=Rattus norvegicus GN=Aldh1l1 PE=1 SV=3	73.49	67.41	36	0.979819	0.810838	72.3	63.86	36	0.946407	0.327556	74.96	65.74	42	0.909661	0.110316	0.945296	0.0350921
sp|Q6AY57|WIPI2_RAT	WD repeat domain phosphoinositide-interacting protein 2 OS=Rattus norvegicus GN=Wipi2 PE=1 SV=1	4.22	17.98	2	1.09386	0.404739	6.03	20.67	3	0.895764	0.364335	6.48	27.87	3	0.846596	0.0707526	0.945406	0.130892
tr|E9PSV5|E9PSV5_RAT	Phosphoserine aminotransferase OS=Rattus norvegicus GN=Psat1 PE=1 SV=2	32.99	56.76	16	1.08644	0.0523726	36.19	62.7	17	0.896079	0.452278	33.7	60.27	17	0.853878	0.409137	0.945466	0.123899
sp|Q5XI97|AASD1_RAT	Alanyl-tRNA editing protein Aarsd1 OS=Rattus norvegicus GN=Aarsd1 PE=1 SV=1	11.27	35.92	6	1.03899	0.715194	11.77	33.5	5	0.997535	0.989804	9.74	28.4	5	0.800636	0.548442	0.945719	0.127344
tr|F1M8G9|F1M8G9_RAT	Neural cell adhesion molecule 2 OS=Rattus norvegicus GN=Ncam2 PE=1 SV=2	25.04	41.76	13	0.990403	0.896749	26.25	42.25	12	0.913901	0.537198	24.09	37.73	13	0.932962	0.542588	0.945756	0.0398231
sp|Q923M1|MSRA_RAT	Mitochondrial peptide methionine sulfoxide reductase OS=Rattus norvegicus GN=Msra PE=1 SV=1	6.21	34.33	3	0.857446	0.692739	6.52	56.22	3	1.20182	0.632031	9.49	38.63	5	0.779179	0.528124	0.946147	0.224848
tr|G3V9S0|G3V9S0_RAT	NADH-cytochrome b5 reductase OS=Rattus norvegicus GN=Cyb5r1 PE=1 SV=1	10.34	32.13	5	0.732107	0.501282	9.5	32.79	5	0.991843	0.983823	9.55	26.56	5	1.11557	0.754771	0.946507	0.195711
sp|Q9JMJ4|PRP19_RAT	Pre-mRNA-processing factor 19 OS=Rattus norvegicus GN=Prpf19 PE=1 SV=2	11.87	21.83	6	0.98283	0.797825	15.7	30.16	8	0.895014	0.339999	16.41	33.13	8	0.962022	0.701322	0.946622	0.045889
tr|A0A0G2JZG7|A0A0G2JZG7_RAT	Serine--tRNA ligase, cytoplasmic OS=Rattus norvegicus GN=Sars PE=1 SV=1	21.91	47.76	11	1.01275	0.855789	26.04	47.01	13	0.834126	0.238392	27.91	46.64	14	0.99303	0.879028	0.946636	0.0979337
sp|B0BNE5|ESTD_RAT	S-formylglutathione hydrolase OS=Rattus norvegicus GN=Esd PE=2 SV=1	10.17	35.46	5	1.08466	0.193831	12.59	36.88	6	0.870475	0.405671	15.92	50	8	0.884889	0.445386	0.946676	0.119718
tr|C0KUC6|C0KUC6_RAT	LIM and senescent cell antigen-like-containing domain protein OS=Rattus norvegicus GN=Lims1 PE=1 SV=1	7.16	42.38	4	1.2312	0.198665	5.92	34.88	3	0.818066	0.365286	4.39	44.7	2	0.79289	0.700505	0.947386	0.246113
sp|P63142|KCNA2_RAT	Potassium voltage-gated channel subfamily A member 2 OS=Rattus norvegicus GN=Kcna2 PE=1 SV=1	15.95	34.27	8	1.04789	0.814776	17.65	29.66	10	0.935521	0.358886	20.25	28.66	11	0.860455	0.0766627	0.947956	0.0943359
sp|P11915|NLTP_RAT	Non-specific lipid-transfer protein OS=Rattus norvegicus GN=Scp2 PE=1 SV=3	19.95	41.68	10	0.999455	0.998295	18.35	35.65	8	1.00393	0.974428	20.83	45.89	10	0.841124	0.648554	0.94817	0.0927311
sp|Q63118|CALRL_RAT	Calcitonin gene-related peptide type 1 receptor OS=Rattus norvegicus GN=Calcrl PE=2 SV=1	3.62	8.836	2	1.02737	0	3.95	15.09	2	0.990275	0.938613	3.14	6.681	2	0.827119	0.315397	0.948255	0.106534
tr|E9PT66|E9PT66_RAT	Splicing factor 3b, subunit 3 OS=Rattus norvegicus GN=Sf3b3 PE=1 SV=2	11.42	17.58	7	0.71614	0.182797	9.25	23.91	6	0.927249	0.833849	10.31	20.62	6	1.20276	0.469443	0.948717	0.244021
tr|Q5XIA5|Q5XIA5_RAT	Coenzyme A synthase OS=Rattus norvegicus GN=Coasy PE=1 SV=1	6.79	15.45	4	1.07768	0.62765	7.53	19.36	5	0.861467	0.403782	11.83	18.65	6	0.907083	0.459327	0.948743	0.113967
sp|P16446|PIPNA_RAT	Phosphatidylinositol transfer protein alpha isoform OS=Rattus norvegicus GN=Pitpna PE=1 SV=2	11	52.77	7	1.14065	0.33606	13.51	49.08	8	0.823929	0.0712009	11.67	48.34	7	0.88267	0.134664	0.949082	0.16848
sp|Q5U1Z2|TPPC3_RAT	Trafficking protein particle complex subunit 3 OS=Rattus norvegicus GN=Trappc3 PE=2 SV=1	4.21	42.22	2	1.02276	0.765736	7.09	39.44	4	0.928755	0.74338	6.56	48.89	4	0.896397	0.597435	0.949303	0.0656375
sp|P19511|AT5F1_RAT	ATP synthase F(0) complex subunit B1, mitochondrial OS=Rattus norvegicus GN=Atp5f1 PE=1 SV=1	29.23	48.44	15	0.993941	0.917134	29.99	49.61	15	1.00991	0.927436	26.64	38.28	13	0.84418	0.166109	0.949343	0.0914226
tr|A0A0H2UHG0|A0A0H2UHG0_RAT	Tyrosine--tRNA ligase OS=Rattus norvegicus GN=Yars PE=1 SV=1	44.82	64.54	20	0.958696	0.574441	47.79	59.4	26	0.94822	0.803148	45.68	62.59	22	0.941457	0.318389	0.949458	0.00868613
sp|P06685|AT1A1_RAT	Sodium/potassium-transporting ATPase subunit alpha-1 OS=Rattus norvegicus GN=Atp1a1 PE=1 SV=1	89.55	54.35	48	1.03015	0.751058	86.77	51.91	44	0.947452	0.561088	88.68	52.69	44	0.871833	0.303359	0.949812	0.0791854
sp|Q80W92|VAC14_RAT	Protein VAC14 homolog OS=Rattus norvegicus GN=Vac14 PE=1 SV=1	11.61	23.24	6	1.21439	0.611993	11.37	30.27	5	0.852066	0.817212	14.75	26.69	8	0.783094	0.491699	0.949851	0.231681
sp|Q6MG55|ABHGA_RAT	Protein ABHD16A OS=Rattus norvegicus GN=Abhd16a PE=2 SV=1	10.9	25.45	6	0.940579	0.651312	8.81	21.51	4	0.948771	0.711398	15.75	32.08	8	0.96041	0.605374	0.94992	0.00996487
sp|O70377|SNP23_RAT	Synaptosomal-associated protein 23 OS=Rattus norvegicus GN=Snap23 PE=1 SV=1	10.68	68.57	5	1.07381	0.517374	12.06	53.33	6	0.810534	0.0665443	11.27	57.14	6	0.965703	0.920616	0.950016	0.132338
tr|G3V7Z3|G3V7Z3_RAT	Nucleolar protein 3 OS=Rattus norvegicus GN=Nol3 PE=1 SV=1	7.06	28.05	4	0.92137	0.453316	10	36.65	5	0.943461	0.533829	10.01	34.39	5	0.985598	0.834428	0.950143	0.0326311
tr|D3ZXD2|D3ZXD2_RAT	ATP-binding cassette, subfamily A (ABC1), member 8a OS=Rattus norvegicus GN=Abca8a PE=1 SV=3	25.2	20.06	14	0.901874	0.672945	33.54	25.14	17	0.945678	0.691065	27.46	20.5	13	1.00321	0.988571	0.950255	0.050823
sp|Q6AXT5|RAB21_RAT	Ras-related protein Rab-21 OS=Rattus norvegicus GN=Rab21 PE=2 SV=1	14.13	39.46	7	1.02211	0.877297	14.22	37.22	7	0.919995	0.774247	14.9	45.29	8	0.908673	0.485954	0.950258	0.0624794
tr|A0A0G2K1L8|A0A0G2K1L8_RAT	Brain acid soluble protein 1 OS=Rattus norvegicus GN=Basp1 PE=1 SV=1	26.44	84.47	13	0.935248	0	26.12	84.47	13	1.02794	0	24.29	80.37	12	0.88799	0	0.950392	0.0711924
tr|F1M6E5|F1M6E5_RAT	NAC alpha domain-containing OS=Rattus norvegicus GN=Nacad PE=1 SV=2	12.11	16.67	6	1.08971	0.582717	9.86	13.49	5	0.622397	0.362763	16.13	16.6	9	1.13971	0.162665	0.950605	0.285334
sp|P63039|CH60_RAT	60 kDa heat shock protein, mitochondrial OS=Rattus norvegicus GN=Hspd1 PE=1 SV=1	64.3	55.15	36	1.01011	0.795741	70.69	71.55	38	0.96035	0.589701	72.91	63.53	40	0.881361	0.145746	0.950607	0.0649253
tr|F1LSH6|F1LSH6_RAT	Potassium/sodium hyperpolarization-activated cyclic nucleotide-gated channel 1 OS=Rattus norvegicus GN=Hcn1 PE=4 SV=1	6.1	23.17	3	1.00543	0.978086	6.72	18.96	3	1.09521	0.718714	6.21	19.29	3	0.751522	0.384084	0.950719	0.178254
tr|D4A305|D4A305_RAT	Coiled-coil domain containing 58 (Predicted), isoform CRA_c OS=Rattus norvegicus GN=Ccdc58 PE=1 SV=1	4.61	42.36	2	0.853803	0.53635	4.23	43.06	2	1.01171	0.925194	5.18	47.92	3	0.986823	0.950928	0.950777	0.0848989
sp|Q6AY86|VP26A_RAT	Vacuolar protein sorting-associated protein 26A OS=Rattus norvegicus GN=Vps26a PE=1 SV=1	11.48	40.37	6	0.823443	0.526333	10.17	32.72	5	0.974589	0.865994	10.86	35.47	6	1.05477	0.478125	0.950933	0.117462
tr|Q6GMM8|Q6GMM8_RAT	Long-chain fatty acid transport protein 1 OS=Rattus norvegicus GN=Slc27a1 PE=1 SV=1	18.74	37.46	9	1.01523	0.895	19.41	48.76	11	0.929528	0.480843	17.64	38.08	10	0.908492	0.42051	0.951084	0.056542
sp|P20788|UCRI_RAT	Cytochrome b-c1 complex subunit Rieske, mitochondrial OS=Rattus norvegicus GN=Uqcrfs1 PE=1 SV=2	11.21	41.97	7	0.81682	0.489655	13.05	48.91	8	1.0049	0.960227	13.89	47.45	7	1.03182	0.762886	0.951182	0.117136
tr|F1LTZ5|F1LTZ5_RAT	Ectonucleotide pyrophosphatase/phosphodiesterase 4 OS=Rattus norvegicus GN=Enpp4 PE=1 SV=2	5.83	16.08	4	0.892957	0.470907	6.3	15.2	4	0.984786	0.848799	7.21	21.37	4	0.976644	0.772959	0.951462	0.0508303
tr|G3V6I1|G3V6I1_RAT	Lethal(2) giant larvae protein homolog 1 OS=Rattus norvegicus GN=Llgl1 PE=1 SV=2	30.44	34.96	16	1.03116	0.6699	37.48	37.68	18	0.939812	0.549674	40.91	37.68	21	0.88348	0.375997	0.951484	0.0745286
tr|F1LQP9|F1LQP9_RAT	Transportin 1 OS=Rattus norvegicus GN=Tnpo1 PE=1 SV=3	14.07	17.98	7	1.04421	0.492231	12.99	21.12	6	0.993469	0.976796	11.67	19.1	6	0.817168	0.349715	0.951617	0.119168
sp|Q66HC5|NUP93_RAT	Nuclear pore complex protein Nup93 OS=Rattus norvegicus GN=Nup93 PE=1 SV=1	1.19	26.37	2	0.82007	0.424132	8.64	33.33	5	1.01477	0.975415	6.27	22.1	4	1.02129	0.964799	0.952042	0.114338
tr|F1LS98|F1LS98_RAT	Protein kinase C OS=Rattus norvegicus GN=Prkca PE=1 SV=3	16.09	31.7	8	1.121	0.350706	15.24	24.7	7	0.828375	0.257092	22.79	37.5	12	0.907407	0.665214	0.952261	0.151381
tr|F7EMB2|F7EMB2_RAT	Similar to Hypothetical protein CGI-99 OS=Rattus norvegicus GN=Rtraf PE=1 SV=1	9.28	56.97	6	0.909464	0.420811	10.49	55.33	6	1.02495	0.891367	8.37	45.08	4	0.923338	0.717072	0.952584	0.063055
sp|Q5RK30|SBDS_RAT	Ribosome maturation protein SBDS OS=Rattus norvegicus GN=Sbds PE=2 SV=1	12.27	56.8	7	0.867772	0.404579	15.84	49.6	8	0.802832	0.42592	13.31	52.8	7	1.18808	0.212979	0.952895	0.206248
sp|Q64057|AL7A1_RAT	Alpha-aminoadipic semialdehyde dehydrogenase OS=Rattus norvegicus GN=Aldh7a1 PE=1 SV=2	32.59	44.16	16	0.971414	0.582596	34.35	50.83	18	0.949805	0.610776	36.18	51.21	19	0.939459	0.523969	0.95356	0.0163051
tr|D4ABB2|D4ABB2_RAT	Megalencephalic leukoencephalopathy with subcortical cysts 1 OS=Rattus norvegicus GN=Mlc1 PE=1 SV=1	8.24	32.76	4	0.887424	0.118582	9.17	27.34	5	1.02574	0.660789	7.71	33	4	0.94768	0.350726	0.953614	0.0693488
tr|E9PSY8|E9PSY8_RAT	Epidermal growth factor receptor pathway substrate 15 OS=Rattus norvegicus GN=Eps15 PE=1 SV=2	6.1	17.73	3	1.01898	0.842255	16.31	38.13	9	0.835576	0.690539	10.71	28.54	5	1.00631	0.973771	0.953622	0.102427
sp|Q5M7W5|MAP4_RAT	Microtubule-associated protein 4 OS=Rattus norvegicus GN=Map4 PE=1 SV=1	60.37	43.42	30	1.0423	0.752746	60.02	44.28	29	0.853971	0.356345	64.06	47.87	32	0.966607	0.892793	0.954293	0.0947674
sp|P97846|CNTP1_RAT	Contactin-associated protein 1 OS=Rattus norvegicus GN=Cntnap1 PE=1 SV=1	24.08	23.03	14	1.13258	0.163756	35.33	28.17	17	0.96402	0.703336	27.62	24.62	16	0.767545	0.134355	0.954714	0.182694
tr|A0A0G2K6I0|A0A0G2K6I0_RAT	Similar to ribosomal protein S15a OS=Rattus norvegicus GN=LOC691716 PE=3 SV=1	7.06	60.63	5	0.989531	0.953093	6.1	55.91	3	0.889484	0.790938	7.15	60.63	4	0.986508	0.956721	0.955174	0.0569095
tr|G3V918|G3V918_RAT	Trifunctional purine biosynthetic protein adenosine-3 OS=Rattus norvegicus GN=Gart PE=1 SV=1	22.51	27.33	11	1.06073	0.754382	28.43	36.73	14	0.938565	0.493344	31.77	31.68	15	0.866837	0.304303	0.955378	0.0980353
sp|O08651|SERA_RAT	D-3-phosphoglycerate dehydrogenase OS=Rattus norvegicus GN=Phgdh PE=1 SV=3	49.62	46.72	26	0.95506	0.607838	48.48	49.53	26	0.789862	0.000306002	48.99	48.59	25	1.12197	0.0316592	0.955631	0.166055
sp|P42123|LDHB_RAT	L-lactate dehydrogenase B chain OS=Rattus norvegicus GN=Ldhb PE=1 SV=2	46.48	64.07	25	0.97305	0.6893	48.75	63.47	27	1.0334	0.653741	46.38	58.98	25	0.8607	0.259704	0.955717	0.0876455
sp|P68255|1433T_RAT	14-3-3 protein theta OS=Rattus norvegicus GN=Ywhaq PE=1 SV=1	37.98	72.24	19	0.984922	0.972508	37.8	73.88	19	0.934978	0.455863	40.18	71.43	20	0.94753	0.673075	0.95581	0.0259813
tr|F1M049|F1M049_RAT	Ataxin 2 OS=Rattus norvegicus GN=Atxn2 PE=1 SV=3	11.8	25.53	7	0.995358	0.960867	10.46	26.18	6	0.87781	0.60868	10.62	26.82	5	0.994343	0.983755	0.955837	0.0675757
tr|D3ZT90|D3ZT90_RAT	Glutaryl-CoA dehydrogenase OS=Rattus norvegicus GN=Gcdh PE=1 SV=1	10.93	29.75	6	1.08524	0.67296	12.4	37.14	6	0.910963	0.331091	11.64	45.64	6	0.871379	0.175077	0.95586	0.113779
tr|A0A0G2K261|A0A0G2K261_RAT	Isoleucyl-tRNA synthetase 2, mitochondrial OS=Rattus norvegicus GN=Iars2 PE=1 SV=1	34.74	37.59	17	0.937042	0.631745	38.22	43.72	20	0.983368	0.865466	35.45	37.98	18	0.948575	0.678769	0.956328	0.0241166
sp|Q66HG4|GALM_RAT	Aldose 1-epimerase OS=Rattus norvegicus GN=Galm PE=1 SV=1	4.01	29.53	2	0.926302	0.581375	8.09	34.5	4	1.03932	0.635817	9.22	33.33	5	0.90338	0.334253	0.956336	0.0727789
tr|B2RYJ7|B2RYJ7_RAT	ARP1 actin-related protein 1 homolog B OS=Rattus norvegicus GN=Actr1b PE=1 SV=1	12.68	50.27	6	0.928957	0	20.51	54.26	9	0.942376	0.571531	16.79	58.24	8	0.997741	0.980667	0.956358	0.0364616
sp|Q5XIU5|PSMF1_RAT	Proteasome inhibitor PI31 subunit OS=Rattus norvegicus GN=Psmf1 PE=1 SV=1	8.48	26.57	4	0.91206	0.670962	8.45	26.57	4	0.877699	0.552913	9.73	31.37	5	1.07933	0.642717	0.956364	0.107872
tr|D3ZJK8|D3ZJK8_RAT	ATPase phospholipid transporting 8A1 OS=Rattus norvegicus GN=Atp8a1 PE=1 SV=3	6.13	44.34	3	0.957224	0.77179	2.7	25.47	2	1.01712	0.904219	2.62	35.85	2	0.895122	0.507759	0.956488	0.0610002
sp|P62168|NCS1_RAT	Neuronal calcium sensor 1 OS=Rattus norvegicus GN=Ncs1 PE=1 SV=2	10.07	48.42	6	1.01628	0.839318	9.27	53.68	6	1.05051	0.662174	10.97	48.42	6	0.803525	0.123141	0.956772	0.133815
tr|D4A304|D4A304_RAT	DIRAS family GTPase 1 OS=Rattus norvegicus GN=Diras1 PE=4 SV=1	9.35	38.38	5	0.971544	0.829211	16.79	56.57	10	0.883324	0.449923	12.09	53.54	7	1.01565	0.894337	0.956838	0.0673763
tr|A0A0G2K5P9|A0A0G2K5P9_RAT	Propionyl-CoA carboxylase alpha chain, mitochondrial OS=Rattus norvegicus GN=Pcca PE=1 SV=1	28.21	46	14	0.856599	0.21295	25.35	43.42	12	0.899527	0.361666	26.86	46.13	13	1.11491	0.273472	0.957012	0.138418
tr|A0A0G2K132|A0A0G2K132_RAT	Formin-like 2 OS=Rattus norvegicus GN=Fmnl2 PE=1 SV=1	34.18	39.11	17	1.02829	0.698205	33.64	44.51	17	0.962509	0.565817	36.28	40.46	17	0.880764	0.295498	0.957189	0.0739083
tr|F1LV89|F1LV89_RAT	Rap1 GTPase-activating protein OS=Rattus norvegicus GN=Rap1gap PE=1 SV=3	13.72	32.14	8	0.881698	0.211238	10.83	39.18	6	1.01828	0.918506	15.93	34.26	8	0.972581	0.824664	0.957521	0.0695266
tr|A0A0G2K101|A0A0G2K101_RAT	Leucine zipper protein 1 OS=Rattus norvegicus GN=Luzp1 PE=1 SV=1	17.63	50.52	10	0.990668	0.95872	18.24	37.77	10	0.972896	0.82576	15.26	37.96	9	0.908998	0.437431	0.957521	0.0429508
tr|F1M5N4|F1M5N4_RAT	Malic enzyme OS=Rattus norvegicus GN=Me3 PE=3 SV=2	7.49	23.47	4	1.05803	0.642363	12.66	33.88	8	0.935767	0.255917	14.81	35.54	8	0.879214	0.26732	0.95767	0.0913968
sp|Q6NX65|PDC10_RAT	Programmed cell death protein 10 OS=Rattus norvegicus GN=Pdcd10 PE=2 SV=1	7.89	32.86	4	0.928258	0.723532	6.05	47.14	4	1.05033	0.778143	9.83	60.95	5	0.895592	0.930276	0.958061	0.081562
tr|F1LNK0|F1LNK0_RAT	Microtubule-associated protein OS=Rattus norvegicus GN=Map2 PE=1 SV=3	139.82	59.68	69	0.935698	0.630131	160.41	63.13	82	1.00924	0.819848	137.05	61.07	68	0.929426	0.21653	0.95812	0.0443782
tr|D4AE68|D4AE68_RAT	Guanine nucleotide binding protein, alpha q polypeptide, isoform CRA_a OS=Rattus norvegicus GN=Gnaq PE=1 SV=2	27.86	59.89	15	1.01017	0.82944	28.64	59.05	14	0.941246	0.266123	28.42	66.3	15	0.92311	0.291297	0.958174	0.0459309
tr|A0A0G2K191|A0A0G2K191_RAT	Tubulin-specific chaperone E OS=Rattus norvegicus GN=Tbce PE=1 SV=1	6.71	39.6	5	0.917475	0.495075	9.2	27.85	5	0.978648	0.888098	3.8	34.54	2	0.978502	0.922144	0.958208	0.0352764
tr|Q5M9F7|Q5M9F7_RAT	ARP10 actin-related protein 10 homolog (S. cerevisiae) OS=Rattus norvegicus GN=Actr10 PE=1 SV=1	11.28	41.49	6	0.99368	0.921795	11.51	46.04	6	0.931612	0.606147	16.12	40.53	8	0.951479	0.75961	0.958924	0.0316967
sp|P48500|TPIS_RAT	Triosephosphate isomerase OS=Rattus norvegicus GN=Tpi1 PE=1 SV=2	39.17	91.16	22	0.998308	0.988298	39.44	93.57	23	0.933762	0.344197	40.37	91.57	22	0.945327	0.603583	0.959133	0.0344164
tr|F1M4I4|F1M4I4_RAT	VPS51 GARP complex subunit OS=Rattus norvegicus GN=Vps51 PE=1 SV=2	8.05	25.48	4	0.932034	0.695037	13.11	30.6	7	0.996701	0.988953	11.73	31.37	7	0.948894	0.796981	0.95921	0.033545
tr|F7F2F3|F7F2F3_RAT	Heat shock 70 kDa protein 4L OS=Rattus norvegicus GN=Hspa4l PE=1 SV=1	68.34	57.42	32	0.98887	0.880365	70.56	52.31	35	0.956766	0.227864	70.53	54.38	37	0.933364	0.151525	0.959667	0.0278667
tr|F1LPG5|F1LPG5_RAT	NADH:ubiquinone oxidoreductase subunit B4 OS=Rattus norvegicus GN=Ndufb4 PE=1 SV=1	13.74	66.67	7	0.89633	0.37602	14.04	72.09	7	1.06263	0.455715	13.78	72.87	7	0.920292	0.264897	0.95975	0.0898969
tr|A0A0G2JSV0|A0A0G2JSV0_RAT	N-myc downstream regulated gene 2, isoform CRA_a OS=Rattus norvegicus GN=Ndrg2 PE=1 SV=1	28.86	60.65	16	0.953963	0.557692	28.13	59.57	15	0.965	0.551161	28.61	57.68	15	0.960944	0.549549	0.959969	0.00558272
tr|M0R5P8|M0R5P8_RAT	ADAM metallopeptidase domain 22 OS=Rattus norvegicus GN=Adam22 PE=1 SV=2	28.25	36	13	0.910506	0.403798	30.07	34.71	15	0.997767	0.964879	28.91	44.39	14	0.972237	0.689008	0.96017	0.0448647
tr|F1LM47|F1LM47_RAT	Succinate--CoA ligase [ADP-forming] subunit beta, mitochondrial OS=Rattus norvegicus GN=Sucla2 PE=1 SV=1	37.02	49.89	18	0.970762	0.633146	44.11	60.86	21	0.993099	0.943802	36.05	53.12	17	0.916761	0.101086	0.960207	0.0392484
sp|Q9Z272|GIT1_RAT	ARF GTPase-activating protein GIT1 OS=Rattus norvegicus GN=Git1 PE=1 SV=1	14.43	25.71	7	0.977545	0.844149	17.16	40.39	8	0.940675	0.36361	19.87	38.44	10	0.962824	0.667681	0.960348	0.0185593
tr|A0A0G2K013|A0A0G2K013_RAT	Alpha-actinin-4 OS=Rattus norvegicus GN=Actn4 PE=1 SV=1	68.71	58.63	34	1.23896	0.0142002	83.63	63.45	41	0.817145	0	85.51	65.7	43	0.825473	0	0.960527	0.241167
tr|A0A0G2JVW5|A0A0G2JVW5_RAT	E3 ubiquitin-protein ligase HUWE1 OS=Rattus norvegicus GN=Huwe1 PE=1 SV=1	17.26	17.45	13	0.881203	0.29544	20.52	17.63	18	0.972572	0.695561	26.26	21.34	18	1.02804	0.782281	0.960605	0.074146
tr|D4A7F2|D4A7F2_RAT	Myc-binding protein OS=Rattus norvegicus GN=Mycbp PE=1 SV=1	6.32	48.54	3	1.04356	0.844085	4.5	37.86	2	0.931671	0.60453	3.93	58.25	2	0.906826	0.515195	0.960687	0.07284
sp|P60905|DNJC5_RAT	DnaJ homolog subfamily C member 5 OS=Rattus norvegicus GN=Dnajc5 PE=1 SV=1	6	33.33	3	0.971751	0.868612	4.8	46.46	3	0.975472	0.859794	4.03	33.33	2	0.935843	0.783952	0.961022	0.0218847
sp|P85834|EFTU_RAT	Elongation factor Tu, mitochondrial OS=Rattus norvegicus GN=Tufm PE=1 SV=1	33.45	61.28	17	0.981588	0.899049	37.84	65.71	19	0.928523	0.703916	40.03	69.25	21	0.973013	0.874522	0.961042	0.028486
sp|P85968|6PGD_RAT	6-phosphogluconate dehydrogenase, decarboxylating OS=Rattus norvegicus GN=Pgd PE=1 SV=1	28.48	46.79	14	1.00641	0.909108	35.21	53.62	18	0.942273	0.409847	32.58	56.73	16	0.934567	0.547757	0.961084	0.0394444
tr|M0R9N8|M0R9N8_RAT	Anillin, actin-binding protein-like 1 OS=Rattus norvegicus GN=Anlnl1 PE=4 SV=1	32.52	36.52	15	1.10441	0.0432918	32.7	36.52	16	0.894988	0.196125	28.95	39.4	15	0.883913	0.145874	0.961104	0.12423
tr|A0A096MIT7|A0A096MIT7_RAT	Synapsin-3 OS=Rattus norvegicus GN=Syn3 PE=1 SV=2	14.14	27.46	7	0.920316	0.230294	14.88	35.58	7	1	1	12.21	32.99	8	0.963123	0.552544	0.961147	0.0398796
sp|P59215|GNAO_RAT	Guanine nucleotide-binding protein G(o) subunit alpha OS=Rattus norvegicus GN=Gnao1 PE=1 SV=2	35.76	55.93	19	0.997027	0.956498	34.03	54.24	17	1.00349	0.931996	35.11	51.98	18	0.883737	0.0608876	0.961418	0.0673514
tr|G3V624|G3V624_RAT	Coronin OS=Rattus norvegicus GN=Coro1c PE=1 SV=1	28	43.25	14	0.919342	0.470462	31.18	43.25	16	1.00006	1	32.77	47.89	17	0.965545	0.772598	0.961648	0.0404982
sp|P11730|KCC2G_RAT	Calcium/calmodulin-dependent protein kinase type II subunit gamma OS=Rattus norvegicus GN=Camk2g PE=1 SV=1	38.32	52.18	19	0.983713	0.879175	36.16	56.36	19	1.02594	0.770166	34.31	62.05	18	0.875761	0.515878	0.961803	0.0774484
sp|D3ZFB6|PRRT2_RAT	Proline-rich transmembrane protein 2 OS=Rattus norvegicus GN=Prrt2 PE=1 SV=1	4.03	18.9	2	0.919826	0.439012	4.66	18.31	3	1.10952	0.826067	4.01	13.08	2	0.856167	0	0.961838	0.131798
tr|B2GUZ3|B2GUZ3_RAT	Methylenetetrahydrofolate dehydrogenase (NADP+-dependent) 1-like OS=Rattus norvegicus GN=Mthfd1l PE=1 SV=1	27.14	36.85	14	0.944227	0.805833	30.63	32.24	16	1.07623	0.760142	28.48	36.44	14	0.866021	0.416701	0.96216	0.106247
sp|P21707|SYT1_RAT	Synaptotagmin-1 OS=Rattus norvegicus GN=Syt1 PE=1 SV=3	22.41	40.62	11	0.992083	0.943342	23.94	43.23	11	0.922542	0.556154	23.1	48.93	11	0.972013	0.856259	0.962213	0.0357916
sp|Q6RJR6|RTN3_RAT	Reticulon-3 OS=Rattus norvegicus GN=Rtn3 PE=1 SV=1	31.38	32.34	15	0.93501	0.266133	29.12	32.66	15	1.01456	0.739513	30.51	36.17	15	0.93833	0.259948	0.962632	0.0449988
tr|D4A746|D4A746_RAT	GDP-mannose pyrophosphorylase B OS=Rattus norvegicus GN=Gmppb PE=1 SV=1	10.85	56.39	6	0.715394	0.105322	8.42	26.39	4	0.844841	0.718946	12.12	43.33	6	1.32817	0.345573	0.962801	0.322969
tr|D3ZKG9|D3ZKG9_RAT	Clustered mitochondria protein homolog OS=Rattus norvegicus GN=Cluh PE=1 SV=3	4.96	24.5	3	1.00512	0.928775	6.43	20.57	4	0.79483	0.14934	9.71	25.35	5	1.08857	0.324268	0.962837	0.151363
sp|Q8CFN2|CDC42_RAT	Cell division control protein 42 homolog OS=Rattus norvegicus GN=Cdc42 PE=1 SV=2	12.65	46.07	7	1.06578	0	17.79	52.36	9	1.04544	0	18.34	52.36	9	0.777403	0	0.962874	0.160944
sp|F1LQX4|RHG44_RAT	Rho GTPase-activating protein 44 OS=Rattus norvegicus GN=Arhgap44 PE=1 SV=2	7.36	17.81	4	0.85766	0.388695	8.93	18.06	5	1.05031	0.708929	8.38	17.57	5	0.980751	0.871668	0.962906	0.0975546
sp|Q9WVR7|PPM1F_RAT	Protein phosphatase 1F OS=Rattus norvegicus GN=Ppm1f PE=2 SV=1	10.43	31.56	5	1.16633	0.172652	12.02	31.33	6	0.859236	0.115946	14.18	43.11	7	0.863488	0.100718	0.963017	0.176084
tr|M0RC65|M0RC65_RAT	Cofilin 2 OS=Rattus norvegicus GN=Cfl2 PE=1 SV=1	18.79	86.75	9	1.04924	0.500557	20.62	81.33	10	0.963248	0.748437	19.94	74.1	10	0.876852	0.506572	0.963114	0.0861956
tr|D3ZUY8|D3ZUY8_RAT	AP-2 complex subunit alpha OS=Rattus norvegicus GN=Ap2a1 PE=1 SV=1	67.14	56.5	32	0.912331	0.572042	72.63	51.18	35	1.01416	0.926506	73.21	53.22	36	0.963102	0.432377	0.963197	0.0509134
tr|A0A0H2UHB1|A0A0H2UHB1_RAT	3-keto-steroid reductase OS=Rattus norvegicus GN=Hsd17b7 PE=1 SV=1	11.29	24.48	6	0.841084	0.221779	7.72	23.58	4	1.05241	0.506822	8.87	26.57	5	0.996869	0.977501	0.963454	0.109554
tr|D3ZUL1|D3ZUL1_RAT	Coiled-coil domain-containing 124 OS=Rattus norvegicus GN=Ccdc124 PE=1 SV=1	9.44	53.92	6	0.959272	0.8028	6.21	39.63	3	0.722678	0.665049	7.93	59.91	5	1.20842	0.344474	0.963457	0.242898
sp|Q5PPN5|TPPP3_RAT	Tubulin polymerization-promoting protein family member 3 OS=Rattus norvegicus GN=Tppp3 PE=2 SV=1	17.09	69.89	10	1.02206	0.849874	24	75	12	0.999942	1	28.19	65.34	15	0.868825	0.455766	0.963611	0.0828282
tr|G3V928|G3V928_RAT	LDL receptor-related protein 1 OS=Rattus norvegicus GN=Lrp1 PE=1 SV=1	48.74	23.67	37	1.00865	0.911272	45.04	23.08	34	0.889555	0.150753	47.26	24.31	36	0.992693	0.935277	0.963631	0.0646459
tr|G3V7V3|G3V7V3_RAT	Solute carrier family 27 (Fatty acid transporter), member 4 OS=Rattus norvegicus GN=Slc27a4 PE=1 SV=1	12.97	37.01	6	1.0723	0.353491	13.04	39.35	7	0.803938	0.430271	15.14	42.3	7	1.01549	0.929823	0.963911	0.141423
sp|P51583|PUR6_RAT	Multifunctional protein ADE2 OS=Rattus norvegicus GN=Paics PE=1 SV=3	19.33	42.12	10	1.02207	0.820779	20.16	39.76	10	0.864366	0.380527	16.88	35.29	9	1.0054	0.969441	0.963945	0.0866393
tr|Q6AXW2|Q6AXW2_RAT	RCG25684, isoform CRA_a OS=Rattus norvegicus GN=Tmod3 PE=1 SV=1	8.61	38.35	4	1.04516	0.786595	8.16	42.05	4	0.942337	0.469601	5.74	40.63	3	0.904685	0.448582	0.964059	0.0727107
tr|F1LRJ9|F1LRJ9_RAT	Selenium-binding protein 1 OS=Rattus norvegicus GN=Selenbp1 PE=1 SV=2	12.29	36.69	6	0.962421	0.573014	15.05	41.53	8	0.928533	0.213447	16.94	47.58	9	1.00147	0.995134	0.964142	0.0364998
sp|P06761|GRP78_RAT	78 kDa glucose-regulated protein OS=Rattus norvegicus GN=Hspa5 PE=1 SV=1	63.95	60.86	31	1.01897	0.809906	65.97	62.84	31	0.858514	0.126703	68.9	56.27	33	1.01517	0.862638	0.96422	0.0915636
tr|Q99PV2|Q99PV2_RAT	Syntaxin binding protein 3, isoform CRA_a OS=Rattus norvegicus GN=Stxbp3 PE=1 SV=1	21.28	36.59	12	1.04846	0.709431	23.08	40.47	11	0.874595	0.420965	26.8	40.98	13	0.970026	0.829625	0.96436	0.08707
sp|Q4V8I7|LRC8A_RAT	Volume-regulated anion channel subunit LRRC8A OS=Rattus norvegicus GN=Lrrc8a PE=1 SV=1	17.9	26.67	9	0.85707	0.366241	15.17	26.91	7	1.04279	0.72257	15.71	29.26	8	0.994057	0.969532	0.964637	0.09629
sp|D3Z8L7|RRAS_RAT	Ras-related protein R-Ras OS=Rattus norvegicus GN=Rras PE=1 SV=1	7.75	67.43	4	0.915501	0.52207	6.77	50.46	4	0.939757	0.784345	6.76	67.89	4	1.03872	0.7014	0.964659	0.0652743
tr|E9PSJ4|E9PSJ4_RAT	Sperm-associated antigen 9 OS=Rattus norvegicus GN=Spag9 PE=1 SV=2	21.34	38.79	12	0.991622	0.974446	20.26	34.92	10	1.01484	0.942844	16.7	28.03	9	0.887531	0.566576	0.964665	0.0678013
tr|Q68FS8|Q68FS8_RAT	RNA terminal phosphate cyclase domain 1 OS=Rattus norvegicus GN=Rtca PE=1 SV=1	13.58	55.74	7	0.979227	0.880713	16.16	51.37	8	0.90374	0.322437	14.67	45.08	7	1.01104	0.861123	0.96467	0.055113
tr|F1M1Y0|F1M1Y0_RAT	SH3-containing GRB2-like protein 3-interacting protein 1 OS=Rattus norvegicus GN=Sgip1 PE=1 SV=3	17.08	24.55	9	0.996666	0.986941	14.57	23.82	7	1.05745	0.36714	8.78	21.16	4	0.840155	0.296329	0.964758	0.112107
tr|D4A3C2|D4A3C2_RAT	Similar to RIKEN cDNA 6430548M08 OS=Rattus norvegicus GN=RGD1304884 PE=1 SV=1	17.51	39.8	9	0.991529	0.910981	13.53	41.03	8	1.03526	0.639998	17.03	43.24	10	0.867508	0.201024	0.964765	0.0870188
sp|Q63584|TMEDA_RAT	Transmembrane emp24 domain-containing protein 10 OS=Rattus norvegicus GN=Tmed10 PE=1 SV=2	10.82	39.73	6	0.970987	0.733109	9.9	31.96	5	0.979144	0.766158	9.31	45.66	5	0.945327	0.54137	0.965153	0.0176472
tr|G3V945|G3V945_RAT	Aldehyde dehydrogenase family 5, subfamily A1 OS=Rattus norvegicus GN=Aldh5a1 PE=1 SV=1	30.43	40.54	16	0.963576	0.656584	34.74	49.71	18	1.01556	0.697311	35.44	48.37	17	0.91649	0.096863	0.965209	0.0495561
tr|A0A0G2JVE6|A0A0G2JVE6_RAT	Aminopeptidase OS=Rattus norvegicus GN=Anpep PE=1 SV=1	14.37	14.92	7	0.95536	0.65412	5.2	13.16	3	0.736302	0.332581	8.45	17.31	4	1.20445	0.303329	0.965371	0.234236
sp|P51146|RAB4B_RAT	Ras-related protein Rab-4B OS=Rattus norvegicus GN=Rab4b PE=2 SV=1	13.58	66.2	7	1.10726	0.385511	16.95	56.34	9	0.908276	0.666887	16.22	56.34	8	0.881149	0.31294	0.965563	0.123463
sp|P23514|COPB_RAT	Coatomer subunit beta OS=Rattus norvegicus GN=Copb1 PE=1 SV=1	21.62	28.23	10	0.935949	0.80789	18.48	36.41	9	0.92264	0.445108	21.42	36.2	11	1.03826	0.730186	0.965617	0.0632638
sp|O89049|TRXR1_RAT	Thioredoxin reductase 1, cytoplasmic OS=Rattus norvegicus GN=Txnrd1 PE=1 SV=5	16.82	48.7	9	0.938645	0.630973	16.88	37.88	10	0.979765	0.857601	16.74	39.48	8	0.978604	0.82283	0.965671	0.0234128
sp|P12711|ADHX_RAT	Alcohol dehydrogenase class-3 OS=Rattus norvegicus GN=Adh5 PE=1 SV=2	22.02	38.77	11	0.985686	0.824396	22.34	45.99	12	0.952434	0.412311	20.9	48.93	11	0.959069	0.632167	0.96573	0.0175979
sp|Q08877|DYN3_RAT	Dynamin-3 OS=Rattus norvegicus GN=Dnm3 PE=1 SV=2	61.16	54.09	30	1.04021	0.528195	66.69	57.19	32	0.968061	0.814692	68.36	58	33	0.889046	0.157893	0.965772	0.0756077
tr|G3V7I5|G3V7I5_RAT	Aldehyde dehydrogenase X, mitochondrial OS=Rattus norvegicus GN=Aldh1b1 PE=1 SV=1	19.58	40.85	10	0.917766	0.720466	22.86	46.05	12	0.950274	0.67176	22.17	42.77	12	1.02949	0.852741	0.965842	0.057464
tr|D3ZLK9|D3ZLK9_RAT	ATP-dependent (S)-NAD(P)H-hydrate dehydratase OS=Rattus norvegicus GN=Naxd PE=1 SV=2	11.49	44.66	6	0.9243	0.748618	11.59	47.67	6	0.891202	0.557328	13.57	54.52	7	1.08217	0.81528	0.965891	0.102053
sp|O35179|SH3G2_RAT	Endophilin-A1 OS=Rattus norvegicus GN=Sh3gl2 PE=1 SV=2	25.07	57.95	13	1.00406	0.949424	31.31	66.76	16	0.918513	0.498109	30.04	69.89	15	0.975142	0.896952	0.965905	0.0435153
sp|P61265|STX1B_RAT	Syntaxin-1B OS=Rattus norvegicus GN=Stx1b PE=1 SV=1	31.52	53.82	18	1.01174	0.919323	33.48	53.82	16	0.961829	0.627762	34.85	53.82	18	0.926758	0.360325	0.966774	0.0427045
tr|B2RYN1|B2RYN1_RAT	Fructosamine-3-kinase-related protein OS=Rattus norvegicus GN=Fn3krp PE=1 SV=1	9.75	36.89	5	1.05267	0.642659	6.62	36.57	3	0.893068	0.586601	6.09	37.54	3	0.954605	0.804003	0.966781	0.0804944
sp|B4F7E8|NIBL1_RAT	Niban-like protein 1 OS=Rattus norvegicus GN=Fam129b PE=1 SV=1	3.55	23.83	4	0.793961	0.132484	8.38	28.38	4	1.08231	0.356058	12.72	15.53	7	1.0241	0.855332	0.966791	0.152479
tr|D3ZQD3|D3ZQD3_RAT	Oxoglutarate dehydrogenase-like OS=Rattus norvegicus GN=Ogdhl PE=1 SV=2	18.59	36.44	9	1.13048	0.665891	36.62	36.04	18	0.873995	0.543534	30.61	40.3	15	0.896006	0.537752	0.966827	0.142154
sp|Q80ZG1|RIC8A_RAT	Synembryn-A OS=Rattus norvegicus GN=Ric8a PE=1 SV=2	8.2	35.54	5	0.893888	0.742481	10.95	33.84	6	1.08852	0.586563	9.33	36.11	5	0.918113	0.476128	0.966841	0.106072
sp|Q6AXX6|F213A_RAT	Redox-regulatory protein FAM213A OS=Rattus norvegicus GN=Fam213a PE=1 SV=1	16.39	46.29	8	1.00753	0.907432	14.83	54.15	7	0.961218	0.52359	14.22	53.28	7	0.932018	0.33648	0.96692	0.0380758
sp|P52481|CAP2_RAT	Adenylyl cyclase-associated protein 2 OS=Rattus norvegicus GN=Cap2 PE=1 SV=1	9.76	32.08	5	1.04955	0.670838	12.5	47.8	7	1.01796	0.757674	7.64	40.67	4	0.833497	0.294225	0.967003	0.116694
sp|Q63041|A1M_RAT	Alpha-1-macroglobulin OS=Rattus norvegicus GN=A1m PE=1 SV=1	68.89	41.6	38	0.768284	0.00757762	54.72	38.13	28	0.780086	0.0367255	55.7	39.07	30	1.35296	0.00764652	0.967111	0.33421
sp|Q63198|CNTN1_RAT	Contactin-1 OS=Rattus norvegicus GN=Cntn1 PE=1 SV=2	67.8	51.22	35	1.07391	0.112244	68.58	56.32	35	0.998335	0.96313	75.05	51.71	39	0.829438	0.000164438	0.967229	0.125171
tr|F1LW91|F1LW91_RAT	Nuclear mitotic apparatus protein 1 OS=Rattus norvegicus GN=Numa1 PE=1 SV=2	16.85	35.02	9	0.884124	0.829013	12.66	33.23	8	1.04473	0.804366	14.81	36.21	9	0.973131	0.963128	0.967327	0.0804585
sp|O88989|MDHC_RAT	Malate dehydrogenase, cytoplasmic OS=Rattus norvegicus GN=Mdh1 PE=1 SV=3	28.9	45.81	15	1.09363	0.630517	33.25	50.3	17	0.922367	0.347821	32.76	49.1	16	0.886052	0.272234	0.96735	0.110859
tr|G3V667|G3V667_RAT	Integrin subunit alpha 6 OS=Rattus norvegicus GN=Itga6 PE=1 SV=1	29.34	30.57	17	0.751358	0.0811412	33.39	37.84	17	0.900902	0.144047	37.17	38.58	19	1.24996	0.230374	0.967406	0.255867
sp|Q5U318|PEA15_RAT	Astrocytic phosphoprotein PEA-15 OS=Rattus norvegicus GN=Pea15 PE=1 SV=1	14.37	55.38	7	1.09637	0.365034	19.07	59.23	10	0.908503	0.341271	18.33	55.38	10	0.897373	0.418392	0.967417	0.111819
sp|P47727|CBR1_RAT	Carbonyl reductase [NADPH] 1 OS=Rattus norvegicus GN=Cbr1 PE=1 SV=2	24.03	56.68	12	1.07474	0.135676	29.99	80.14	16	0.94665	0.516211	28.36	76.53	15	0.881245	0.0404508	0.967544	0.098423
tr|D3ZUM4|D3ZUM4_RAT	Beta-galactosidase OS=Rattus norvegicus GN=Glb1 PE=1 SV=1	12.37	27.98	7	0.933597	0.571658	15.33	28.28	9	0.933291	0.645922	14.6	27.05	7	1.0371	0.793367	0.967997	0.0598483
tr|Q811T3|Q811T3_RAT	Kv3.3c voltage gated potassium channel subunit splice variant C OS=Rattus norvegicus GN=Kcnc3 PE=1 SV=1	15.67	20.16	8	0.988475	0.919841	17.48	15.86	9	0.897843	0.126335	14.93	19.77	7	1.01781	0.905848	0.968042	0.0625381
tr|Q3MIE7|Q3MIE7_RAT	COMM domain containing 9, isoform CRA_a OS=Rattus norvegicus GN=Commd9 PE=1 SV=1	7.11	24.75	4	0.909654	0.443331	7.46	41.41	5	0.957838	0.851451	6.69	30.81	4	1.03676	0.699344	0.968083	0.0641677
tr|D3ZQ02|D3ZQ02_RAT	WD repeat domain 37 OS=Rattus norvegicus GN=Wdr37 PE=1 SV=3	8.44	28.95	5	0.849179	0.424885	9.02	33.18	5	1.00728	0.989488	7.41	38.08	5	1.04786	0.961701	0.968107	0.104974
sp|P02625|PRVA_RAT	Parvalbumin alpha OS=Rattus norvegicus GN=Pvalb PE=1 SV=2	12.78	72.73	7	0.982878	0.89496	11.91	65.45	6	0.790999	0.12559	10.55	68.18	5	1.13052	0.0989713	0.968132	0.170239
tr|A0A0G2K351|A0A0G2K351_RAT	Malectin OS=Rattus norvegicus GN=Unc119b PE=1 SV=1	4.82	19.52	3	0.975219	0	3.04	23.51	2	0.779413	0	5.17	35.46	3	1.15049	0.779628	0.968375	0.185635
sp|Q566R0|THEM4_RAT	Acyl-coenzyme A thioesterase THEM4 OS=Rattus norvegicus GN=Them4 PE=2 SV=1	3.8	39.13	2	1.01841	0.797109	8.42	26.96	5	1.05666	0.550923	4.16	37.83	2	0.830314	0.566786	0.968462	0.121159
sp|Q5XIP1|PELO_RAT	Protein pelota homolog OS=Rattus norvegicus GN=Pelo PE=1 SV=1	11.75	42.08	7	0.962334	0.720518	9.89	40	5	0.977851	0.846974	16.94	51.43	9	0.965476	0.715765	0.968554	0.00820358
sp|P16617|PGK1_RAT	Phosphoglycerate kinase 1 OS=Rattus norvegicus GN=Pgk1 PE=1 SV=2	45	70.02	23	1.01788	0.762078	53.13	81.29	29	0.956311	0.56707	50.27	85.37	27	0.931772	0.511889	0.968655	0.0443622
tr|F1LVZ9|F1LVZ9_RAT	HECT domain E3 ubiquitin protein ligase 3 OS=Rattus norvegicus GN=Hectd3 PE=1 SV=3	4.14	19.28	2	0.77471	0.492115	8.4	29.62	4	1.16292	0.508213	9.71	30.2	5	0.968548	0.69929	0.968725	0.194104
sp|Q5XIC0|ECI2_RAT	Enoyl-CoA delta isomerase 2, mitochondrial OS=Rattus norvegicus GN=Eci2 PE=1 SV=1	12.18	41.69	6	1.06827	0.511692	16.85	51.66	9	0.919737	0.573474	14.05	42.2	7	0.918194	0.160605	0.968733	0.0862027
tr|A0A0G2K350|A0A0G2K350_RAT	NSF attachment protein gamma OS=Rattus norvegicus GN=Napg PE=1 SV=1	29.13	53.85	14	1.02088	0.864841	34.12	60.9	18	0.979804	0.81658	32.12	50.32	17	0.905522	0.312633	0.968735	0.0584703
sp|P23711|HMOX2_RAT	Heme oxygenase 2 OS=Rattus norvegicus GN=Hmox2 PE=1 SV=1	10.17	36.83	6	1.07896	0.408612	14.24	43.81	7	0.908726	0.49011	17.76	46.98	9	0.918776	0.509573	0.968821	0.0955156
tr|A0A140TAC3|A0A140TAC3_RAT	Epsin-1 OS=Rattus norvegicus GN=Epn1 PE=1 SV=1	7.77	20.14	4	0.905022	0.532283	7.57	21.7	4	1.11044	0.407477	6.27	18.75	3	0.891001	0.553356	0.968821	0.122846
tr|F1LZX5|F1LZX5_RAT	HECT domain E3 ubiquitin protein ligase 4 OS=Rattus norvegicus GN=Hectd4 PE=1 SV=3	7.37	15.58	6	1.12151	0.819278	13.11	19.56	8	0.871276	0.462024	7.71	21.5	6	0.913814	0.273885	0.968867	0.133894
sp|P07825|SYPH_RAT	Synaptophysin OS=Rattus norvegicus GN=Syp PE=1 SV=1	7.43	15.96	4	0.990686	0.918787	6	24.76	3	1.02504	0.88919	6.05	28.34	3	0.891295	0.463072	0.969006	0.0694558
sp|Q4V7F2|CREL1_RAT	Cysteine-rich with EGF-like domain protein 1 OS=Rattus norvegicus GN=Creld1 PE=2 SV=1	5.41	25.95	3	0.858191	0.406533	6.73	24.76	4	1.12675	0.632278	5.69	20.48	3	0.922904	0.51728	0.969283	0.140159
tr|F1LUE2|F1LUE2_RAT	Calcium/calmodulin-dependent protein kinase II, beta, isoform CRA_c OS=Rattus norvegicus GN=Camk2b PE=1 SV=2	37.23	45.35	18	1.06599	0.510718	38.69	56.61	21	1.00217	0.98553	35.45	56.01	19	0.840881	0.485111	0.969679	0.116018
sp|O35567|PUR9_RAT	Bifunctional purine biosynthesis protein PURH OS=Rattus norvegicus GN=Atic PE=1 SV=2	40.56	64.02	21	1.03943	0.695834	41.83	69.26	21	0.896994	0.0883534	46.79	69.93	24	0.972668	0.661657	0.969696	0.0712621
sp|Q6IUR5|NENF_RAT	Neudesin OS=Rattus norvegicus GN=Nenf PE=2 SV=1	6.53	64.91	3	0.847099	0.644408	5.69	47.95	3	1.0942	0.301378	6.08	47.37	4	0.967953	0.867405	0.96975	0.12356
sp|P41562|IDHC_RAT	Isocitrate dehydrogenase [NADP] cytoplasmic OS=Rattus norvegicus GN=Idh1 PE=1 SV=1	39.94	58.45	19	1.03902	0.651159	36.2	60.87	17	0.941505	0.446461	43.54	61.35	21	0.92898	0.392298	0.969834	0.0602401
tr|B5DEI0|B5DEI0_RAT	Pcyox1l protein OS=Rattus norvegicus GN=Pcyox1l PE=2 SV=1	6.17	26.72	3	0.931212	0.564911	5.28	19.03	4	0.987911	0.907333	8.68	19.03	5	0.990657	0.892907	0.969927	0.0335561
sp|A0JPJ7|OLA1_RAT	Obg-like ATPase 1 OS=Rattus norvegicus GN=Ola1 PE=2 SV=1	26.89	45.71	14	0.990752	0.900669	26.04	47.22	13	0.986354	0.937171	26.51	45.96	13	0.932964	0.534877	0.970023	0.0321692
tr|G3V8C4|G3V8C4_RAT	Chloride intracellular channel protein OS=Rattus norvegicus GN=Clic4 PE=1 SV=1	23.49	67.98	12	1.05471	0.560009	22.32	71.94	11	0.909135	0.271731	24.61	74.7	12	0.946283	0.296301	0.970043	0.07564
tr|F1LSC3|F1LSC3_RAT	Splicing factor 1 OS=Rattus norvegicus GN=Sf1 PE=1 SV=2	6.61	21.6	4	0.898809	0.320341	4.91	15.34	3	1.00551	0.952515	2.41	16.74	2	1.00595	0.961816	0.970092	0.0617333
sp|Q63692|CDC37_RAT	Hsp90 co-chaperone Cdc37 OS=Rattus norvegicus GN=Cdc37 PE=1 SV=2	22.65	50.66	12	1.02549	0.795709	23.44	49.6	11	0.899709	0.504963	25.1	54.09	12	0.986407	0.958239	0.970535	0.0643756
sp|P11507|AT2A2_RAT	Sarcoplasmic/endoplasmic reticulum calcium ATPase 2 OS=Rattus norvegicus GN=Atp2a2 PE=1 SV=1	69.29	38.93	35	1.0064	0.968289	64.54	40.36	32	0.943712	0.667462	64.96	39.21	32	0.962061	0.775321	0.970723	0.0322274
tr|B5DFN4|B5DFN4_RAT	Prefoldin 5 (Predicted), isoform CRA_a OS=Rattus norvegicus GN=Pfdn5 PE=1 SV=1	11.52	66.23	6	0.977669	0.725205	11.87	62.34	7	0.950745	0.410987	12.07	55.84	6	0.98394	0.820334	0.970785	0.0176361
tr|G3V7C6|G3V7C6_RAT	Tubulin beta chain OS=Rattus norvegicus GN=Tubb4b PE=1 SV=2	64.36	66.42	39	1.05181	0.739399	66.38	66.97	42	1.00199	0.990877	64.27	65.15	40	0.85926	0.601792	0.97102	0.0999417
sp|P70541|EI2BG_RAT	Translation initiation factor eIF-2B subunit gamma OS=Rattus norvegicus GN=Eif2b3 PE=2 SV=2	2.87	12.17	2	0.944897	0.671934	4.4	26.99	3	1.05232	0.807536	8.68	31.64	4	0.916057	0.701862	0.97109	0.0718071
sp|P33124|ACSL6_RAT	Long-chain-fatty-acid--CoA ligase 6 OS=Rattus norvegicus GN=Acsl6 PE=1 SV=1	68.05	72.17	34	1.05554	0.274534	72.7	65.71	36	0.980698	0	62.63	57.53	31	0.877164	0	0.971132	0.08957
sp|P54645|AAPK1_RAT	5'-AMP-activated protein kinase catalytic subunit alpha-1 OS=Rattus norvegicus GN=Prkaa1 PE=1 SV=2	6.45	26.12	4	1.19291	0.368077	13.96	28.09	7	0.873445	0.524536	14.5	28.8	7	0.847142	0.236112	0.971165	0.192484
sp|P29266|3HIDH_RAT	3-hydroxyisobutyrate dehydrogenase, mitochondrial OS=Rattus norvegicus GN=Hibadh PE=1 SV=3	21.26	42.39	11	0.91654	0.398344	28.23	49.25	15	1.05462	0.280097	26.22	45.37	13	0.942443	0.487054	0.9712	0.0733924
sp|Q05683|DCE2_RAT	Glutamate decarboxylase 2 OS=Rattus norvegicus GN=Gad2 PE=1 SV=1	11.93	26.15	6	1.03343	0.691639	12.12	23.08	7	1.00487	0.966679	15.56	33.16	8	0.875876	0.0672266	0.971394	0.0839443
sp|Q568Z6|IST1_RAT	IST1 homolog OS=Rattus norvegicus GN=Ist1 PE=2 SV=1	7.86	19.13	5	0.949344	0.645662	6.16	25.14	3	0.985934	0.885491	5.03	21.31	3	0.979524	0.887778	0.971601	0.0195395
tr|F1LQ81|F1LQ81_RAT	N-ethylmaleimide sensitive fusion protein, isoform CRA_b OS=Rattus norvegicus GN=Nsf PE=1 SV=3	89.65	62.23	45	1.04008	0.587601	91.27	61.02	46	0.984084	0.69865	95.21	65.59	50	0.890777	0.0223106	0.971647	0.0754256
sp|P14604|ECHM_RAT	Enoyl-CoA hydratase, mitochondrial OS=Rattus norvegicus GN=Echs1 PE=1 SV=1	12.9	49.31	7	0.941154	0.247865	17.52	59.31	9	0.940504	0.678802	18.97	59.31	10	1.0334	0.649296	0.971685	0.0534444
tr|A0A0G2JSQ0|A0A0G2JSQ0_RAT	Serine/threonine-protein phosphatase 2A 55 kDa regulatory subunit B OS=Rattus norvegicus GN=Ppp2r2d PE=1 SV=1	5.08	23.62	3	0.850112	0	9.87	22.96	5	0.966207	0	7.73	29.36	5	1.09886	0	0.971726	0.124466
sp|Q01066|PDE1B_RAT	Calcium/calmodulin-dependent 3',5'-cyclic nucleotide phosphodiesterase 1B OS=Rattus norvegicus GN=Pde1b PE=1 SV=1	14.26	24.3	9	1.00198	0.972122	14.48	22.99	7	1.00016	0.998012	21.21	34.77	10	0.913951	0.477335	0.972033	0.0503088
tr|Q6P9V1|Q6P9V1_RAT	Tetraspanin OS=Rattus norvegicus GN=Cd81 PE=1 SV=1	8	30.93	6	1.0017	0.989477	10	30.93	8	0.959351	0.672893	8.02	30.93	7	0.955087	0.742047	0.972045	0.0257684
tr|A9UMV9|A9UMV9_RAT	NADH:ubiquinone oxidoreductase subunit A7 OS=Rattus norvegicus GN=Ndufa7 PE=1 SV=1	15.02	66.07	7	1.00478	0.969831	17.15	77.68	9	1.00772	0.979352	14.01	72.32	7	0.904088	0.294535	0.972196	0.059002
tr|Q6AY21|Q6AY21_RAT	G3BP stress granule assembly factor 2 OS=Rattus norvegicus GN=G3bp2 PE=1 SV=1	10.8	29.4	6	0.885451	0.181075	8.31	30.29	5	0.925964	0.608673	9.77	35.63	6	1.10582	0.463604	0.972413	0.1173
tr|Q4V8I9|Q4V8I9_RAT	UTP--glucose-1-phosphate uridylyltransferase OS=Rattus norvegicus GN=Ugp2 PE=1 SV=1	25.34	40.75	12	0.957584	0.798693	28.33	50.39	15	1.00873	0.877719	26.86	44.49	13	0.951046	0.350783	0.972454	0.031588
tr|D4ABI6|D4ABI6_RAT	Ubiquitin carboxyl-terminal hydrolase OS=Rattus norvegicus GN=Uchl3 PE=1 SV=2	12.25	47.39	6	1.10347	0.322412	9.03	42.17	5	0.89146	0.192548	8.41	54.35	4	0.922687	0.732304	0.97254	0.114461
tr|G3V679|G3V679_RAT	Transferrin receptor protein 1 OS=Rattus norvegicus GN=Tfrc PE=1 SV=1	17.42	39.16	9	1.15901	0.230058	16.83	35.87	8	0.823084	0.0729503	19.08	40.21	10	0.935603	0.398634	0.972565	0.170985
tr|B1WC26|B1WC26_RAT	N-acetylneuraminate synthase OS=Rattus norvegicus GN=Nans PE=1 SV=1	10.25	33.98	5	1.02521	0.801252	13.46	37.05	7	0.912651	0.72447	12.47	35.1	6	0.979952	0.871731	0.972605	0.0566393
tr|A0A0G2JSM7|A0A0G2JSM7_RAT	Adducin 1 (Alpha), isoform CRA_b OS=Rattus norvegicus GN=Add1 PE=1 SV=1	42.63	50.2	23	0.913473	0	42.75	49.93	21	1.09421	0	51.41	46.39	24	0.910192	0	0.972624	0.105306
tr|D4A1J6|D4A1J6_RAT	Ankyrin repeat and FYVE domain-containing 1 OS=Rattus norvegicus GN=Ankfy1 PE=1 SV=3	17.92	23.27	10	1.03793	0.503525	17.42	20.1	9	0.878324	0.0754952	22.47	23.27	13	1.00171	0.981937	0.972655	0.083676
tr|A0A0H2UHC8|A0A0H2UHC8_RAT	Ubiquitin-like domain-containing CTD phosphatase 1 OS=Rattus norvegicus GN=Ublcp1 PE=1 SV=1	5.24	27.04	3	0.676811	0.158451	6.88	26.1	4	1.17623	0.349989	5.52	16.67	3	1.06494	0.639154	0.97266	0.262187
sp|P01946|HBA_RAT	Hemoglobin subunit alpha-1/2 OS=Rattus norvegicus GN=Hba1 PE=1 SV=3	20.1	89.44	11	0.950894	0.726585	21.97	95.77	13	0.768123	0.00294467	20.8	92.96	14	1.19901	0.364203	0.972675	0.216266
tr|D3ZDH8|D3ZDH8_RAT	Platelet glycoprotein Ib beta chain OS=Rattus norvegicus GN=Sept5 PE=1 SV=1	20.05	53.44	11	1.09978	0.807774	22.83	38.1	12	0.922549	0.487425	16.56	48.68	9	0.896434	0.195665	0.972923	0.110639
sp|P62268|RS23_RAT	40S ribosomal protein S23 OS=Rattus norvegicus GN=Rps23 PE=1 SV=3	2.57	34.97	2	1.01508	0	5.2	27.97	3	0.884284	0.753881	6.13	29.37	3	1.01967	0.961496	0.973013	0.076876
sp|P97536|CAND1_RAT	Cullin-associated NEDD8-dissociated protein 1 OS=Rattus norvegicus GN=Cand1 PE=1 SV=1	70.07	48.46	33	0.982176	0.838408	72.87	43.74	37	1.00305	0.973413	72.69	37.48	37	0.934382	0.364217	0.973203	0.0352038
tr|E9PTX9|E9PTX9_RAT	Solute carrier family 12 member 2 OS=Rattus norvegicus GN=Slc12a2 PE=1 SV=1	41.69	38.9	24	1.09304	0.480442	51.93	39.32	25	0.926216	0.388929	55.93	38.4	28	0.900886	0.13577	0.97338	0.104397
tr|A0A0G2K2V2|A0A0G2K2V2_RAT	AP complex subunit beta OS=Rattus norvegicus GN=Ap1b1 PE=1 SV=1	59.21	42.04	31	0.950622	0.348546	55.32	45.65	27	0.956755	0.838524	58.14	44.8	27	1.01298	0.942762	0.973452	0.0343691
sp|O35353|GBB4_RAT	Guanine nucleotide-binding protein subunit beta-4 OS=Rattus norvegicus GN=Gnb4 PE=2 SV=4	12.2	39.71	6	0.976014	0.894192	20.02	54.41	10	0.977154	0.829276	16.01	39.12	8	0.967207	0.801825	0.973458	0.00544342
sp|Q9QUR2|DCTN4_RAT	Dynactin subunit 4 OS=Rattus norvegicus GN=Dctn4 PE=1 SV=1	17.6	33.83	9	1.09053	0.182076	15.05	33.4	8	0.894465	0.303641	15.43	36.62	7	0.935603	0.799455	0.973531	0.103387
sp|B5DFN2|SAHH2_RAT	S-adenosylhomocysteine hydrolase-like protein 1 OS=Rattus norvegicus GN=Ahcyl1 PE=1 SV=2	37.42	37.06	19	0.947521	0.846242	40.56	49.9	20	1.01841	0.861279	40.2	44.31	21	0.955314	0.559668	0.973748	0.0388733
tr|B1WC02|B1WC02_RAT	CTP synthase OS=Rattus norvegicus GN=Ctps1 PE=1 SV=1	8.03	27.41	4	0.895868	0.336847	3.5	25.21	2	1.15173	0.734737	4.62	27.92	2	0.873895	0.288289	0.973832	0.154459
sp|O35346|FAK1_RAT	Focal adhesion kinase 1 OS=Rattus norvegicus GN=Ptk2 PE=1 SV=1	6.05	21.33	3	1.16602	0.403557	6.1	21.23	3	0.839436	0.617792	3.68	17.82	2	0.916883	0.678671	0.974113	0.170647
tr|M0R4S2|M0R4S2_RAT	Apolipoprotein D OS=Rattus norvegicus GN=Apod PE=3 SV=1	11.91	44.97	6	1.08389	0.472199	12.32	42.86	6	0.914833	0.231932	14.05	44.97	7	0.923617	0.377189	0.974113	0.0951716
sp|P24329|THTR_RAT	Thiosulfate sulfurtransferase OS=Rattus norvegicus GN=Tst PE=1 SV=3	23.08	52.86	12	1.01156	0.95852	25.6	56.9	12	0.984211	0.943411	25.67	53.54	13	0.926776	0.745135	0.974183	0.0432737
sp|P10362|SCG2_RAT	Secretogranin-2 OS=Rattus norvegicus GN=Scg2 PE=1 SV=1	25.1	39.9	13	0.900851	0.346054	27.1	43.94	14	1.14055	0.16916	24.25	51.53	12	0.881312	0.465952	0.974238	0.144362
tr|D3ZW08|D3ZW08_RAT	Adenylosuccinate lyase OS=Rattus norvegicus GN=Adsl PE=1 SV=1	12.85	28.93	7	1.03035	0.583717	17.8	43.6	10	0.918935	0.607433	18.28	35.54	9	0.973761	0.763923	0.974349	0.0557099
sp|Q66H98|CAVN2_RAT	Caveolae-associated protein 2 OS=Rattus norvegicus GN=Cavin2 PE=1 SV=3	5.27	26.14	4	0.702391	0.219022	5.47	24.94	3	0.941157	0.747316	4.12	27.34	2	1.27952	0.328626	0.974357	0.289995
sp|P22734|COMT_RAT	Catechol O-methyltransferase OS=Rattus norvegicus GN=Comt PE=1 SV=2	16.2	44.7	8	0.779791	0.21888	10.91	27.65	6	1.03174	0.639606	18.63	48.86	9	1.1117	0.254038	0.97441	0.173222
sp|Q4FZT9|PSMD2_RAT	26S proteasome non-ATPase regulatory subunit 2 OS=Rattus norvegicus GN=Psmd2 PE=1 SV=1	29.39	35.68	15	1.06333	0.711113	24.85	37.33	13	0.892743	0.691458	24.02	31.61	12	0.967473	0.913701	0.974515	0.0855108
tr|Q499T3|Q499T3_RAT	Sirpa protein OS=Rattus norvegicus GN=Sirpa PE=1 SV=1	8.5	30.8	4	0.956881	0.730705	11.25	30.6	5	0.898356	0.540863	12.18	30.6	7	1.06872	0.737882	0.974654	0.0865637
tr|G3V9J7|G3V9J7_RAT	Rab GTPase-binding effector protein 1 OS=Rattus norvegicus GN=Rabep1 PE=1 SV=1	17.2	48.03	9	1.01166	0.932459	30.87	54.87	15	0.860784	0.342952	32.31	46.87	17	1.05209	0.593142	0.974845	0.100826
tr|G3V936|G3V936_RAT	Citrate synthase OS=Rattus norvegicus GN=Cs PE=1 SV=1	30.61	43.78	15	0.974382	0.699208	31.72	47.42	16	1.03696	0.420732	34.24	42.92	17	0.913513	0.0691392	0.974952	0.0617263
sp|Q2PQA9|KINH_RAT	Kinesin-1 heavy chain OS=Rattus norvegicus GN=Kif5b PE=1 SV=1	66.13	61.47	32	1.04596	0.719671	67.38	62.31	34	0.89567	0.195424	75.31	68.64	35	0.983604	0.878098	0.975078	0.0755065
sp|Q66H61|SYQ_RAT	Glutamine--tRNA ligase OS=Rattus norvegicus GN=Qars PE=1 SV=1	23.17	50.97	11	0.907134	0.619817	26.73	49.03	12	0.967888	0.570798	26.4	54.06	14	1.0505	0.513821	0.975173	0.0719589
sp|Q9QYW3|PHOCN_RAT	MOB-like protein phocein OS=Rattus norvegicus GN=Mob4 PE=1 SV=1	8.03	52.44	5	0.951366	0.802703	10.94	44.44	6	1.00244	0.984614	8	40	4	0.972211	0.77255	0.97534	0.0256823
sp|P20070|NB5R3_RAT	NADH-cytochrome b5 reductase 3 OS=Rattus norvegicus GN=Cyb5r3 PE=1 SV=2	10.24	42.52	7	1.03533	0.672129	12.24	57.81	6	0.943314	0.740329	16.11	60.8	9	0.947719	0.520638	0.975455	0.0519005
tr|G3V949|G3V949_RAT	CAP-Gly domain-containing linker protein 2 OS=Rattus norvegicus GN=Clip2 PE=1 SV=1	48.27	53.58	23	0.979791	0.934146	50.56	50.53	24	0.930484	0.468387	56.09	60.46	25	1.01655	0.913589	0.975609	0.0431864
tr|F2Z3T7|F2Z3T7_RAT	Isochorismatase domain-containing protein 1 OS=Rattus norvegicus GN=LOC103694869 PE=1 SV=1	11.27	28.28	6	0.905813	0.222888	14.27	34.34	7	1.14157	0.345891	13.35	39.06	6	0.879487	0.367106	0.975623	0.144314
tr|A0JN29|A0JN29_RAT	Limb and neural patterns OS=Rattus norvegicus GN=Lnpk PE=1 SV=1	7.53	31.38	4	0.803348	0.5122	10.23	23.67	5	1.06034	0.360503	8.85	36.17	5	1.06358	0.353137	0.975758	0.14932
sp|P11348|DHPR_RAT	Dihydropteridine reductase OS=Rattus norvegicus GN=Qdpr PE=1 SV=1	21.28	72.61	12	1.0844	0.130018	25.83	70.12	16	0.875837	0.506494	22.29	67.63	12	0.967039	0.673695	0.97576	0.104556
tr|F1LS86|F1LS86_RAT	Isoleucine-tRNA synthetase (Predicted) OS=Rattus norvegicus GN=Iars PE=1 SV=2	23.15	25.2	13	1.02267	0.811366	15.21	25.2	10	0.996378	0.976085	13.53	26.23	8	0.908279	0.699395	0.975777	0.0599151
sp|P22062|PIMT_RAT	Protein-L-isoaspartate(D-aspartate) O-methyltransferase OS=Rattus norvegicus GN=Pcmt1 PE=1 SV=2	13.51	65.2	7	1.08669	0.4317	16.58	62.11	8	0.951984	0.564698	19.21	62.11	10	0.888858	0.322404	0.975844	0.101052
sp|Q9QXY2|SRCN1_RAT	SRC kinase signaling inhibitor 1 OS=Rattus norvegicus GN=Srcin1 PE=1 SV=1	44.46	59.23	21	1.07804	0.394665	50.74	59.82	25	1.01423	0.892639	52.59	58.23	27	0.835769	0.0252638	0.976011	0.125573
sp|Q5XIG4|OCAD1_RAT	OCIA domain-containing protein 1 OS=Rattus norvegicus GN=Ociad1 PE=1 SV=1	13.15	62.75	8	1.03708	0.525986	12.57	50.2	6	0.96436	0.792686	10.89	39.27	7	0.926973	0.566909	0.976139	0.0559921
sp|Q80U96|XPO1_RAT	Exportin-1 OS=Rattus norvegicus GN=Xpo1 PE=1 SV=1	27.8	38	14	0.942634	0.69734	27.55	28.48	14	0.992003	0.924877	25.3	28.57	13	0.994236	0.94531	0.976291	0.029169
sp|Q9JJL4|RHOQ_RAT	Rho-related GTP-binding protein RhoQ OS=Rattus norvegicus GN=Rhoq PE=2 SV=1	6	20.98	3	1.21044	0	6	23.41	3	0.857664	0	6	17.07	3	0.861414	0	0.976504	0.202599
tr|F8WFM2|F8WFM2_RAT	Beta-soluble NSF attachment protein OS=Rattus norvegicus GN=Napb PE=4 SV=1	36.64	75.5	18	0.991025	0.885738	39.47	78.86	19	0.97292	0.764212	40.57	82.89	20	0.966446	0.619164	0.976797	0.0127398
tr|D3ZHG8|D3ZHG8_RAT	Golgi associated, gamma adaptin ear containing, ARF binding protein 3 (Predicted) OS=Rattus norvegicus GN=Gga3 PE=1 SV=1	4.59	13.83	2	1.10545	0.537697	4.23	9.271	3	0.991358	0.965701	4.45	13.68	2	0.833877	0.718737	0.976896	0.136363
sp|P17764|THIL_RAT	Acetyl-CoA acetyltransferase, mitochondrial OS=Rattus norvegicus GN=Acat1 PE=1 SV=1	38.13	54.72	20	0.973277	0.895384	36.35	54.25	19	1.02022	0.828125	35.97	60.38	17	0.93758	0.618592	0.977026	0.0414472
sp|Q6DGG0|PPID_RAT	Peptidyl-prolyl cis-trans isomerase D OS=Rattus norvegicus GN=Ppid PE=1 SV=3	27.84	56.22	14	0.899166	0.502726	28.83	55.14	14	1.03595	0.678838	25.14	45.14	12	0.996089	0.965802	0.977068	0.0703476
tr|A0A0G2JVE8|A0A0G2JVE8_RAT	RNA-binding protein Nova-1 OS=Rattus norvegicus GN=Nova1 PE=4 SV=1	10.04	23.03	5	0.867047	0.444304	17.26	35.06	8	1.22516	0.351081	12.99	33.2	7	0.839343	0.105002	0.977183	0.215199
tr|B2RYF6|B2RYF6_RAT	CLPTM1, transmembrane protein OS=Rattus norvegicus GN=Clptm1 PE=1 SV=1	6.94	12.95	4	0.8712	0.762944	7.95	16.87	4	0.797021	0.550303	5.74	15.51	4	1.26345	0.598288	0.977224	0.250639
tr|D3ZCI5|D3ZCI5_RAT	Syntaxin-binding protein 6 OS=Rattus norvegicus GN=Stxbp6 PE=1 SV=2	9.45	45.71	5	1.10651	0.516537	14.11	51.43	9	0.915768	0.414327	11.47	61.43	6	0.910371	0.289821	0.977551	0.111718
tr|A0A0G2JSK5|A0A0G2JSK5_RAT	Integrin beta OS=Rattus norvegicus GN=Itgb1 PE=1 SV=1	24.12	26.07	12	0.95974	0.666151	24.2	33.71	12	0.87868	0.317627	22.79	35.21	11	1.0944	0.355059	0.977607	0.108964
sp|P49803|RGS7_RAT	Regulator of G-protein signaling 7 OS=Rattus norvegicus GN=Rgs7 PE=1 SV=2	8.36	39.41	4	0.830035	0.60006	8.49	28.51	4	1.00291	0.986205	10.95	21.38	6	1.10097	0.658738	0.977972	0.137179
tr|D4ACB6|D4ACB6_RAT	Pleckstrin and Sec7 domain containing 2 (Predicted) OS=Rattus norvegicus GN=Psd2 PE=1 SV=1	3.64	18.29	2	0.993365	0.96984	4.15	24.38	2	0.937971	0.512665	5.5	17.25	3	1.00268	0.983063	0.978005	0.0349816
tr|D4A0A1|D4A0A1_RAT	SOGA family member 3 OS=Rattus norvegicus GN=Soga3 PE=1 SV=1	20.01	49.89	9	0.879498	0.460963	24.77	45.66	12	1.07194	0.663223	24.42	46.4	13	0.982857	0.879853	0.978097	0.096308
tr|Q62669|Q62669_RAT	Globin a1 OS=Rattus norvegicus GN=LOC103694855 PE=1 SV=1	17.62	59.86	13	0.794295	0.106072	19.73	62.59	13	0.762046	0.00797936	18.37	65.99	11	1.37818	0.0994167	0.978175	0.346793
sp|B4F795|CTL2_RAT	Choline transporter-like protein 2 OS=Rattus norvegicus GN=Slc44a2 PE=2 SV=1	8.51	15.74	5	0.963103	0.710215	10.58	27.8	5	0.929166	0.587499	14.8	24.4	8	1.04237	0.690254	0.978213	0.0580944
tr|A0A140TAD1|A0A140TAD1_RAT	ADP-sugar pyrophosphatase OS=Rattus norvegicus GN=Nudt5 PE=1 SV=1	6.28	31.05	3	1.1307	0.47222	4.03	21.46	2	0.843787	0.630676	4.08	20.55	2	0.960204	0.898451	0.978231	0.144304
tr|D4A133|D4A133_RAT	ATPase H+-transporting V1 subunit A OS=Rattus norvegicus GN=Atp6v1a PE=1 SV=1	57.76	59.64	28	1.03847	0.615623	56.04	63.86	28	0.972079	0.753569	52.08	58.51	26	0.924301	0.374625	0.978283	0.0573358
tr|F1LMQ3|F1LMQ3_RAT	Proteasome 26S subunit, non-ATPase 8 OS=Rattus norvegicus GN=Psmd8 PE=1 SV=1	6.83	38.24	6	1.12793	0.585159	6.2	33.99	4	0.838913	0.460544	3.46	32.29	2	0.968186	0.92025	0.978343	0.144776
tr|F1LPV8|F1LPV8_RAT	Succinate--CoA ligase [GDP-forming] subunit beta, mitochondrial OS=Rattus norvegicus GN=Suclg2 PE=1 SV=2	14.73	36.89	7	0.926664	0.270557	17.81	45.94	9	1.02204	0.837075	17.85	36.43	9	0.986744	0.911666	0.978482	0.0482205
sp|Q812D3|PPIL3_RAT	Peptidyl-prolyl cis-trans isomerase-like 3 OS=Rattus norvegicus GN=Ppil3 PE=2 SV=1	3.04	52.8	2	0.730697	0.201784	5.14	34.16	3	1.14769	0.230575	3.76	31.06	2	1.05747	0.856782	0.97862	0.219395
tr|D3ZTB5|D3ZTB5_RAT	S100 calcium-binding protein A13 OS=Rattus norvegicus GN=S100a13 PE=1 SV=2	9.28	55.1	5	0.846931	0.566022	5.72	58.16	3	1.00847	0.941927	4.79	60.2	3	1.08056	0.670934	0.978656	0.119636
sp|P10760|SAHH_RAT	Adenosylhomocysteinase OS=Rattus norvegicus GN=Ahcy PE=1 SV=3	34.34	47.69	17	0.918896	0.633961	35.95	46.3	18	0.982225	0.810952	35.84	45.83	19	1.03532	0.824458	0.978812	0.0582843
sp|B0BNM1|NNRE_RAT	NAD(P)H-hydrate epimerase OS=Rattus norvegicus GN=Naxe PE=2 SV=1	8.76	45.04	5	0.977327	0.888476	6.03	32.98	3	1.0175	0.89642	6.28	30.85	3	0.942415	0.553443	0.979081	0.0375736
tr|Q4QQV4|Q4QQV4_RAT	Dead end homolog 1 (Zebrafish) OS=Rattus norvegicus GN=Hars PE=1 SV=1	28.61	53.35	14	1.02088	0.605083	28.19	46.85	14	0.931791	0.504048	25.21	43.7	12	0.985069	0.88339	0.979247	0.0448296
tr|D3Z941|D3Z941_RAT	Methionyl-tRNA synthetase OS=Rattus norvegicus GN=Mars PE=1 SV=1	26.44	35.81	13	0.862951	0.245157	31.9	36.36	16	0.965799	0.674565	27.71	38.36	14	1.10906	0.118878	0.979271	0.123609
tr|F1LP57|F1LP57_RAT	Mitogen-activated protein kinase kinase 4 OS=Rattus norvegicus GN=Map2k4 PE=1 SV=3	20	58.33	10	0.988136	0.950476	17.43	41.13	9	1.08801	0.781888	14.31	44.35	7	0.861765	0.251488	0.979303	0.11338
tr|G3V7I0|G3V7I0_RAT	Peroxiredoxin 3 OS=Rattus norvegicus GN=Prdx3 PE=1 SV=1	14.06	40.08	8	0.996997	0.965152	18.46	47.08	10	1.00161	0.984376	15.21	40.08	9	0.939407	0.360995	0.979338	0.0346584
sp|P63004|LIS1_RAT	Platelet-activating factor acetylhydrolase IB subunit alpha OS=Rattus norvegicus GN=Pafah1b1 PE=1 SV=2	39.96	63.41	19	1.05941	0.516457	38.06	56.83	19	0.988212	0.880238	43.04	71.71	23	0.891655	0.318547	0.97976	0.0841971
tr|A0A140TAA4|A0A140TAA4_RAT	Programmed cell death 6-interacting protein OS=Rattus norvegicus GN=Pdcd6ip PE=1 SV=1	50.75	54.49	25	1.04007	0.547024	54.77	54.38	28	0.929582	0.220771	58.49	57.03	30	0.970579	0.738136	0.980078	0.055854
sp|P07632|SODC_RAT	Superoxide dismutase [Cu-Zn] OS=Rattus norvegicus GN=Sod1 PE=1 SV=2	29.89	97.4	17	1.06371	0.614941	30.29	100	17	0.911089	0.249585	32.82	97.4	18	0.965553	0.85068	0.980116	0.0773436
sp|Q4KMA2|RD23B_RAT	UV excision repair protein RAD23 homolog B OS=Rattus norvegicus GN=Rad23b PE=1 SV=1	13.99	26.27	7	0.844457	0.172385	13.49	27.95	6	1.0833	0.459713	13.55	26.75	9	1.01269	0.961632	0.980149	0.122702
tr|E9PT65|E9PT65_RAT	Radixin OS=Rattus norvegicus GN=Rdx PE=1 SV=2	33.57	51.97	17	0.959998	0.732377	31.82	47.86	16	1.01046	0.918835	30.61	53.52	14	0.970202	0.8019	0.980219	0.0266799
sp|P25113|PGAM1_RAT	Phosphoglycerate mutase 1 OS=Rattus norvegicus GN=Pgam1 PE=1 SV=4	36.11	62.2	18	1.07128	0.218747	37.14	79.92	18	0.967856	0.582423	38	63.78	22	0.901631	0.113498	0.980257	0.0855037
tr|D4A1Q9|D4A1Q9_RAT	Tubulin tyrosine ligase-like 12 OS=Rattus norvegicus GN=Ttll12 PE=1 SV=1	9.11	25.35	5	0.941455	0.815616	13.54	31.77	7	1.01531	0.897192	12.24	32.24	6	0.984049	0.853183	0.98027	0.0370703
tr|G3V827|G3V827_RAT	Cysteine conjugate-beta lyase 1, isoform CRA_a OS=Rattus norvegicus GN=Kyat1 PE=1 SV=1	8.7	32.17	5	0.971902	0.737437	15.52	28.01	8	1.04123	0.544086	14.73	31.95	8	0.927899	0.66928	0.980345	0.0571365
sp|O08873|MADD_RAT	MAP kinase-activating death domain protein OS=Rattus norvegicus GN=Madd PE=1 SV=1	16.21	19.1	9	0.962003	0.839125	16.1	19.41	9	1.06085	0.498013	13.19	22.97	7	0.918292	0.552387	0.980381	0.0730332
sp|Q6AY30|SCPDL_RAT	Saccharopine dehydrogenase-like oxidoreductase OS=Rattus norvegicus GN=Sccpdh PE=1 SV=1	16.85	36.6	9	1.10556	0.105452	15.31	24.24	8	0.952751	0.407462	18.95	34.97	10	0.883044	0.040245	0.980453	0.113816
tr|F7EL36|F7EL36_RAT	Acidic leucine-rich nuclear phosphoprotein 32 family member A OS=Rattus norvegicus GN=Anp32a PE=1 SV=2	9.69	28.74	5	1.08383	0.780197	15.33	37.25	8	0.880325	0.141251	16.79	40.49	8	0.977232	0.777521	0.980464	0.101793
tr|D4A6X4|D4A6X4_RAT	Acylphosphatase OS=Rattus norvegicus GN=Acyp1 PE=1 SV=1	6.05	54.55	3	0.988791	0.931939	7.38	55.56	4	0.996884	0.981775	6.24	67.68	3	0.955727	0.625591	0.980467	0.0218047
tr|D3ZJH9|D3ZJH9_RAT	Malic enzyme OS=Rattus norvegicus GN=Me2 PE=1 SV=1	19.72	39.73	10	0.988203	0.958002	27.86	44.69	15	0.97523	0.649914	24.8	35.96	13	0.978036	0.887245	0.98049	0.00682576
tr|G3V7P6|G3V7P6_RAT	Nudix (Nucleoside diphosphate linked moiety X)-type motif 16 (Predicted), isoform CRA_a OS=Rattus norvegicus GN=Nudt16 PE=1 SV=1	4.89	50.26	3	0.975502	0.939098	8.19	72.31	5	1.02792	0.936972	7.7	64.1	4	0.938745	0.445054	0.980721	0.0448141
sp|Q5I0D1|GLOD4_RAT	Glyoxalase domain-containing protein 4 OS=Rattus norvegicus GN=Glod4 PE=1 SV=1	24.51	58.39	12	1.06783	0.205186	25.34	58.39	13	0.907325	0.303939	25.14	70.13	12	0.967239	0.601944	0.980799	0.0811084
tr|D4A8U7|D4A8U7_RAT	Dynactin 1, isoform CRA_a OS=Rattus norvegicus GN=Dctn1 PE=1 SV=2	73.14	51.52	35	1.01013	0.843431	74.07	49.96	37	0.954649	0.417003	81.9	57.3	43	0.97782	0.866974	0.980867	0.0278666
tr|F1LST4|F1LST4_RAT	Microtubule-associated protein OS=Rattus norvegicus GN=Mapt PE=1 SV=1	51.94	53.19	27	1.05655	0.286698	53.87	54.65	27	0.991974	0.883999	52.51	52.93	27	0.894404	0.10112	0.980976	0.0816308
tr|A0A0G2JUT1|A0A0G2JUT1_RAT	Cell adhesion molecule 1 OS=Rattus norvegicus GN=Cadm1 PE=1 SV=1	5.28	31.43	3	1.19709	0.483716	6.03	26.23	3	0.941382	0.569814	8.01	33.51	5	0.805399	0.348829	0.98129	0.198872
tr|A0A0G2JTA0|A0A0G2JTA0_RAT	FAS-associated factor 2 OS=Rattus norvegicus GN=Faf2 PE=1 SV=1	13.43	40.22	7	0.921985	0.457695	13.93	49.89	7	1.07337	0.516059	10.27	35.06	5	0.949202	0.690428	0.981519	0.0807007
sp|Q63635|STX6_RAT	Syntaxin-6 OS=Rattus norvegicus GN=Stx6 PE=1 SV=1	4.01	20	2	0.951904	0.707451	4.44	33.73	2	0.782063	0	6.06	21.96	3	1.21078	0.709967	0.981581	0.215892
tr|D4AEH9|D4AEH9_RAT	Amylo-1, 6-glucosidase, 4-alpha-glucanotransferase (Glycogen debranching enzyme, glycogen storage disease type III) (Predicted), isoform CRA_a OS=Rattus norvegicus GN=Agl PE=1 SV=1	63.8	41.06	33	1.03148	0.80051	64.57	38.05	32	0.962099	0.406593	62.23	44.13	31	0.951912	0.258599	0.981831	0.0433003
tr|Q5RKJ9|Q5RKJ9_RAT	RAB10, member RAS oncogene family OS=Rattus norvegicus GN=Rab10 PE=1 SV=1	16.03	64	9	0.968081	0.741167	17.32	70.5	9	1.06298	0.465323	19.78	57.5	10	0.916518	0.736269	0.982525	0.0742891
tr|B1WBY1|B1WBY1_RAT	Cul1 protein OS=Rattus norvegicus GN=Cul1 PE=1 SV=1	16.32	31.44	8	0.916357	0.508232	16.81	35.18	8	0.984249	0.908632	15.49	35.7	9	1.04789	0.543157	0.982834	0.0657803
tr|Q5U2P5|Q5U2P5_RAT	C2CD2-like OS=Rattus norvegicus GN=C2cd2l PE=1 SV=1	4.6	30.88	4	0.993692	0.961577	3.15	20.82	2	0.944589	0	6.34	30.59	3	1.01089	0.908265	0.983056	0.0344051
tr|A0A0G2K0S7|A0A0G2K0S7_RAT	RAP1 GTPase-activating protein 2 OS=Rattus norvegicus GN=Rap1gap2 PE=1 SV=1	10.18	30.64	6	1.00285	0.981963	10.63	33.24	5	0.906443	0.430714	6.05	19.97	3	1.04078	0.835872	0.98336	0.0692595
sp|Q6J4I0|PPR1B_RAT	Protein phosphatase 1 regulatory subunit 1B OS=Rattus norvegicus GN=Ppp1r1b PE=1 SV=1	6.13	59.51	3	0.907883	0.824592	9.7	49.76	5	1.10204	0.33458	9.38	39.02	5	0.940754	0.545418	0.983559	0.103914
tr|A0A0G2K189|A0A0G2K189_RAT	Secernin 3 OS=Rattus norvegicus GN=Scrn3 PE=1 SV=1	6.09	17.46	3	1.18949	0.869183	6.84	22.25	4	0.914508	0.426377	6.4	20.1	3	0.846826	0.565445	0.983608	0.181482
tr|A0A0G2JT25|A0A0G2JT25_RAT	L-xylulose reductase OS=Rattus norvegicus GN=Dcxr PE=1 SV=1	10.5	37.79	5	1.23623	0.703538	7.92	34.1	4	0.71631	0.0546571	8	35.02	4	0.998974	0.994943	0.983837	0.260289
tr|A0A0G2JXG3|A0A0G2JXG3_RAT	Cell cycle control protein 50A OS=Rattus norvegicus GN=Tmem30a PE=1 SV=1	4.71	27.75	3	1.102	0.272132	6.06	27.75	4	0.957139	0.703351	7.55	27.47	4	0.893221	0.397818	0.984119	0.106971
tr|A0A0G2K1L0|A0A0G2K1L0_RAT	Tenascin C OS=Rattus norvegicus GN=Tnc PE=1 SV=1	18.43	23.08	11	1.03549	0.608176	24.37	24.62	13	1.0808	0.386845	28.41	23.18	15	0.836194	0.271278	0.98416	0.13013
sp|P10860|DHE3_RAT	Glutamate dehydrogenase 1, mitochondrial OS=Rattus norvegicus GN=Glud1 PE=1 SV=2	66.83	66.31	34	1.00549	0.926404	71.39	65.41	37	1.00064	0.989523	69.43	60.04	34	0.946875	0.46883	0.984332	0.0325297
sp|Q9JIX3|FHIT_RAT	Bis(5'-adenosyl)-triphosphatase OS=Rattus norvegicus GN=Fhit PE=1 SV=1	6.08	46.67	3	1.05047	0.70927	6.22	40.67	3	1.00828	0.973257	6.07	36	3	0.894337	0.546756	0.98436	0.0807654
sp|Q99MI7|UBA3_RAT	NEDD8-activating enzyme E1 catalytic subunit OS=Rattus norvegicus GN=Uba3 PE=1 SV=1	14.73	40.91	8	0.97985	0.786136	12.61	35.71	6	0.948283	0.369903	16.94	38.74	8	1.02505	0.814341	0.984393	0.0385832
tr|D3ZF39|D3ZF39_RAT	UDP-N-acetylglucosamine pyrophosphorylase 1 OS=Rattus norvegicus GN=Uap1 PE=1 SV=2	9.03	36.47	4	0.962763	0.836375	12.7	36.08	7	1.00376	0.981911	12.33	44.53	6	0.988468	0.910558	0.984999	0.0207201
sp|F1LYQ8|FARP1_RAT	FERM, ARHGEF and pleckstrin domain-containing protein 1 OS=Rattus norvegicus GN=Farp1 PE=1 SV=2	17.78	22.78	10	0.781049	0.0167905	14.47	23.64	8	1.05433	0.766343	12.92	24.69	8	1.11978	0.745888	0.985054	0.179678
tr|G3V8B6|G3V8B6_RAT	26S proteasome non-ATPase regulatory subunit 1 OS=Rattus norvegicus GN=Psmd1 PE=1 SV=1	36.59	44.28	18	1.08262	0.280348	27.09	35.68	13	0.8218	0.0107507	30.22	41.45	15	1.05091	0.728425	0.98511	0.142317
tr|G3V8T4|G3V8T4_RAT	DNA damage-binding protein 1 OS=Rattus norvegicus GN=Ddb1 PE=1 SV=1	32.11	37.28	15	1.11737	0.221327	36.8	35.61	19	0.885749	0.12465	37.72	40.35	20	0.952403	0.36792	0.985173	0.119236
sp|P21670|PSA4_RAT	Proteasome subunit alpha type-4 OS=Rattus norvegicus GN=Psma4 PE=1 SV=1	12.78	31.03	7	0.941042	0.292495	14.64	37.93	7	0.911129	0.490139	13.96	41	8	1.10381	0.342645	0.985329	0.103696
tr|D3ZT36|D3ZT36_RAT	ADAM metallopeptidase domain 23 OS=Rattus norvegicus GN=Adam23 PE=4 SV=1	16.39	29.23	10	1.05095	0.74339	17.24	28.5	10	0.986642	0.811204	15.31	28.38	8	0.919195	0.306845	0.985595	0.065882
sp|P13233|CN37_RAT	2',3'-cyclic-nucleotide 3'-phosphodiesterase OS=Rattus norvegicus GN=Cnp PE=1 SV=2	72.92	74.76	38	1.07245	0.105212	79.1	70.71	40	1.01293	0.824883	78.48	74.05	40	0.872733	0.0294889	0.986039	0.102541
tr|Q5XIP0|Q5XIP0_RAT	DnaJ (Hsp40) homolog, subfamily B, member 4 OS=Rattus norvegicus GN=Dnajb4 PE=1 SV=1	6.19	42.43	5	1.15972	0.380718	7.88	27.89	4	1.0202	0.877506	6.32	43.92	4	0.7786	0.265664	0.986171	0.192824
tr|A0A0G2K6G2|A0A0G2K6G2_RAT	Adipocyte plasma membrane-associated protein OS=Rattus norvegicus GN=Apmap PE=1 SV=1	5.73	17.35	4	0.932157	0.774502	6.35	25.06	4	1.00216	0.978135	6.95	24.82	4	1.02431	0.899474	0.986212	0.0481049
tr|A0A0G2JU07|A0A0G2JU07_RAT	Ubiquitin-conjugating enzyme E2 variant 2 OS=Rattus norvegicus GN=Ube2v2 PE=1 SV=1	10.86	73.1	6	0.966756	0.73817	13.24	65.52	7	0.980692	0.762739	9.78	66.9	5	1.01127	0.866695	0.986238	0.0227679
sp|P18886|CPT2_RAT	Carnitine O-palmitoyltransferase 2, mitochondrial OS=Rattus norvegicus GN=Cpt2 PE=1 SV=1	12.15	26.75	7	0.952923	0.808401	17.61	27.81	9	0.956837	0.81027	11.97	21.73	5	1.04908	0.544562	0.98628	0.054423
sp|P27867|DHSO_RAT	Sorbitol dehydrogenase OS=Rattus norvegicus GN=Sord PE=1 SV=4	5.1	25.77	4	1.07111	0.600916	9.06	33.61	4	1.07278	0.729932	6.25	26.89	4	0.815265	0.0312241	0.986385	0.148197
tr|D3ZC55|D3ZC55_RAT	Heat shock 70kDa protein 12A (Predicted), isoform CRA_a OS=Rattus norvegicus GN=Hspa12a PE=1 SV=1	56.44	47.7	29	1.04723	0.440097	63.45	53.93	34	0.998163	0.974123	57.55	49.04	32	0.913939	0.0354179	0.986443	0.0674121
tr|D3ZUM2|D3ZUM2_RAT	Sterile alpha and TIR motif containing 1 (Predicted) OS=Rattus norvegicus GN=Sarm1 PE=1 SV=1	8.43	32.32	4	0.781511	0.797584	15.74	28.87	8	1.04754	0.51594	14.52	32.73	7	1.13048	0.680863	0.98651	0.182314
sp|Q8CHN6|SGPL1_RAT	Sphingosine-1-phosphate lyase 1 OS=Rattus norvegicus GN=Sgpl1 PE=2 SV=1	10.73	28.87	6	0.863024	0.849215	13.98	35.92	7	1.05994	0.906404	17.08	33.98	8	1.03666	0.960841	0.986539	0.107599
tr|A0A0G2JVH4|A0A0G2JVH4_RAT	MICOS complex subunit MIC60 OS=Rattus norvegicus GN=Immt PE=1 SV=1	63.2	55.28	31	0.978476	0.822267	58.46	48.84	29	1.00402	0.971638	56.04	50.77	28	0.977567	0.771807	0.986689	0.01502
sp|P07340|AT1B1_RAT	Sodium/potassium-transporting ATPase subunit beta-1 OS=Rattus norvegicus GN=Atp1b1 PE=1 SV=1	24.97	52.3	13	1.01589	0.908699	24.12	47.04	13	1.05989	0.563178	26.15	48.03	13	0.884485	0.416582	0.986755	0.09126
sp|A9CMA6|TM163_RAT	Transmembrane protein 163 OS=Rattus norvegicus GN=Tmem163 PE=1 SV=1	1.62	8.333	2	1.02136	0.883337	3.13	17.01	2	0.986574	0	4	18.75	2	0.952456	0	0.986796	0.034452
sp|P31016|DLG4_RAT	Disks large homolog 4 OS=Rattus norvegicus GN=Dlg4 PE=1 SV=1	26.72	42.4	14	0.921221	0.269914	32.92	46.41	16	1.03505	0.704013	32.45	43.37	17	1.00413	0.962973	0.9868	0.0588596
sp|P15650|ACADL_RAT	Long-chain specific acyl-CoA dehydrogenase, mitochondrial OS=Rattus norvegicus GN=Acadl PE=1 SV=1	28.03	45.35	13	0.979925	0.750707	39.75	54.19	19	1.02692	0.759882	34.29	51.16	18	0.953731	0.260155	0.986858	0.0370823
sp|Q5QD51|AKA12_RAT	A-kinase anchor protein 12 OS=Rattus norvegicus GN=Akap12 PE=1 SV=1	60.74	33.02	33	1.00817	0.958475	54.1	34.44	28	1.01929	0.922951	61.87	38.77	31	0.933738	0.631195	0.987065	0.0465162
tr|A0A0G2K5U6|A0A0G2K5U6_RAT	Cell adhesion molecule 2 OS=Rattus norvegicus GN=Cadm2 PE=1 SV=1	11.67	32.62	6	1.09752	0.630346	11.11	43.32	6	0.889577	0.560806	10.52	31.28	6	0.97441	0.800396	0.987169	0.104557
tr|Q99JD5|Q99JD5_RAT	Branched-chain-amino-acid aminotransferase OS=Rattus norvegicus GN=Bcat1 PE=2 SV=1	15.92	41.85	8	1.04919	0.749559	18.01	41.35	9	1.00265	0.971201	17.46	36.84	9	0.910025	0.499743	0.987289	0.0708433
sp|Q5XIG0|NUDT9_RAT	ADP-ribose pyrophosphatase, mitochondrial OS=Rattus norvegicus GN=Nudt9 PE=2 SV=1	5.12	32.86	3	0.966738	0.878462	4.1	40.86	2	1.07076	0.61935	4.56	32.86	2	0.924411	0.530204	0.987303	0.0753109
tr|D4AD70|D4AD70_RAT	Similar to 60S ribosomal protein L38 OS=Rattus norvegicus GN=RGD1561636 PE=3 SV=1	4	32.86	2	0.921287	0.572169	3.62	44.29	2	0.872871	0.409796	6.08	51.43	3	1.16841	0.304827	0.987522	0.158512
sp|P17220|PSA2_RAT	Proteasome subunit alpha type-2 OS=Rattus norvegicus GN=Psma2 PE=1 SV=3	18.56	62.82	11	0.835618	0.490734	16.23	61.54	9	1.04005	0.498999	16.16	53.42	8	1.08714	0.393197	0.987604	0.133713
tr|G3V733|G3V733_RAT	Synapsin II, isoform CRA_a OS=Rattus norvegicus GN=Syn2 PE=1 SV=3	31.88	44.54	15	1.03867	0.614091	36.65	51.71	19	1.04361	0.564449	37.17	52.9	18	0.880537	0.386642	0.987606	0.0927574
tr|D3ZJG4|D3ZJG4_RAT	Phosphofurin acidic cluster sorting protein 2 OS=Rattus norvegicus GN=Pacs2 PE=1 SV=2	20.02	22.18	10	1.07282	0.37768	12.72	29.54	6	0.979498	0.690343	20.16	29.66	10	0.911176	0.24553	0.987831	0.0811436
sp|P62632|EF1A2_RAT	Elongation factor 1-alpha 2 OS=Rattus norvegicus GN=Eef1a2 PE=1 SV=1	36.05	53.13	19	0.955707	0.385644	38.35	49.24	20	0.999093	0.998381	39.65	64.79	18	1.00884	0.937299	0.987881	0.0282873
sp|P62909|RS3_RAT	40S ribosomal protein S3 OS=Rattus norvegicus GN=Rps3 PE=1 SV=1	32.75	77.37	17	0.948117	0.539514	26.15	84.36	12	0.963182	0.747392	30.7	81.48	16	1.05245	0.636056	0.987917	0.0563937
tr|A0A0G2JW01|A0A0G2JW01_RAT	Actin-binding LIM protein 1 OS=Rattus norvegicus GN=Ablim1 PE=1 SV=1	7.69	40.28	5	0.750008	0.306159	9.08	45.67	5	1.14814	0.569238	14.91	51.76	8	1.06575	0.822149	0.987965	0.210154
sp|Q7TPB1|TCPD_RAT	T-complex protein 1 subunit delta OS=Rattus norvegicus GN=Cct4 PE=1 SV=3	44.36	71.99	23	1.05923	0.416335	41.93	71.43	20	0.957794	0.5952	47.07	67.35	24	0.947136	0.638681	0.988054	0.0618723
tr|M0R416|M0R416_RAT	Pyridoxal phosphate phosphatase OS=Rattus norvegicus GN=Pdxp PE=1 SV=1	12.17	46.1	7	1.08052	0.491106	16.86	61.69	8	0.984601	0.933315	17.36	63.31	9	0.89908	0.578257	0.988066	0.090768
sp|Q8CFD0|SFXN5_RAT	Sideroflexin-5 OS=Rattus norvegicus GN=Sfxn5 PE=2 SV=1	16.82	39.47	8	1.04496	0.359585	14.45	40.06	8	0.935657	0.746149	14.69	33.33	8	0.984067	0.825119	0.988228	0.0547706
tr|F1LQN3|F1LQN3_RAT	Reticulon OS=Rattus norvegicus GN=Rtn4 PE=1 SV=1	61.43	38.18	32	1.0734	0.323263	58.54	36.11	30	0.928744	0.366802	55.48	36.29	30	0.962794	0.733587	0.988314	0.0756309
sp|Q3MIE4|VAT1_RAT	Synaptic vesicle membrane protein VAT-1 homolog OS=Rattus norvegicus GN=Vat1 PE=1 SV=1	29.85	40.35	15	1.12307	0.0216078	26.55	45.79	14	0.895367	0.0257035	30.65	45.54	15	0.947066	0.408954	0.988502	0.119375
sp|P97521|MCAT_RAT	Mitochondrial carnitine/acylcarnitine carrier protein OS=Rattus norvegicus GN=Slc25a20 PE=1 SV=1	15.15	53.16	8	1.01113	0.859475	14.99	48.84	7	1.00719	0.898294	15.06	43.19	8	0.947193	0.32704	0.988503	0.0358298
tr|F1M8K0|F1M8K0_RAT	Dystroglycan 1 OS=Rattus norvegicus GN=Dag1 PE=1 SV=1	9.78	19.82	6	0.894788	0.127815	11.63	24.19	7	1.02388	0.84515	12.91	15.12	7	1.04696	0.729294	0.988542	0.0820095
tr|A0A0G2JZF0|A0A0G2JZF0_RAT	SEC24 homolog C, COPII coat complex component OS=Rattus norvegicus GN=Sec24c PE=1 SV=1	25.32	31.91	12	1.03339	0.616001	25.86	29.55	13	0.930785	0.343006	29.05	32.01	15	1.00149	0.990014	0.988554	0.0525101
sp|P11661|NU5M_RAT	NADH-ubiquinone oxidoreductase chain 5 OS=Rattus norvegicus GN=Mtnd5 PE=3 SV=3	6	10.02	3	1.04605	0.655407	8	11.33	4	1.06277	0.56492	6	10.67	3	0.856881	0.491832	0.988567	0.114349
tr|B5DEH4|B5DEH4_RAT	UDP-N-acetylglucosamine pyrophosphorylase 1-like 1 OS=Rattus norvegicus GN=Uap1l1 PE=1 SV=1	12.05	38.26	6	0.983328	0.803313	11.36	35.11	6	0.933832	0.505168	15.72	34.91	8	1.04858	0.453249	0.988579	0.0575526
sp|Q6P6V0|G6PI_RAT	Glucose-6-phosphate isomerase OS=Rattus norvegicus GN=Gpi PE=1 SV=1	48.64	52.69	26	1.03286	0.63748	52.23	62.01	28	0.971453	0.555322	49.15	51.61	27	0.961708	0.337791	0.988672	0.0385731
sp|O08623|SQSTM_RAT	Sequestosome-1 OS=Rattus norvegicus GN=Sqstm1 PE=1 SV=1	8.07	29.16	5	0.919017	0.768029	8.77	34.4	4	1.17376	0.749054	8.08	28.25	4	0.87369	0.500206	0.988823	0.161758
tr|D3ZVU4|D3ZVU4_RAT	Ribokinase OS=Rattus norvegicus GN=Rbks PE=1 SV=1	6	16.72	3	1.13978	0.418347	5.09	29.41	3	0.769313	0.566282	7.35	37.77	4	1.05761	0.647491	0.988902	0.194557
tr|F1LZW6|F1LZW6_RAT	Solute carrier family 25 member 13 OS=Rattus norvegicus GN=Slc25a13 PE=1 SV=2	21.9	40.08	11	1.00837	0.905192	21.71	37.19	11	1.00544	0.98065	19.42	34.5	10	0.953063	0.512265	0.988956	0.0311189
tr|D4A7C3|D4A7C3_RAT	RCG50366 OS=Rattus norvegicus GN=Rimkla PE=1 SV=1	8.56	33.16	5	0.977835	0.877625	6.67	28.16	3	1.08147	0.60712	7.62	36.05	4	0.908526	0.74825	0.989278	0.0870398
tr|A0A0G2K3W1|A0A0G2K3W1_RAT	von Willebrand factor A domain-containing 8 OS=Rattus norvegicus GN=Vwa8 PE=1 SV=1	6.69	22.87	4	1.0809	0.699542	9.61	35.34	5	1.05288	0.346284	10.11	28.9	6	0.834198	0.13953	0.989326	0.135073
tr|A0A0G2K5L2|A0A0G2K5L2_RAT	Mitochondrial glutamate carrier 1-like OS=Rattus norvegicus GN=LOC100911440 PE=1 SV=1	16.4	41.49	8	1.00658	0.909504	15.97	38.7	7	1.0633	0.345831	17.15	43.03	9	0.898201	0.366004	0.989358	0.0838834
tr|D3ZEI4|D3ZEI4_RAT	Hepatocyte cell adhesion molecule OS=Rattus norvegicus GN=Hepacam PE=1 SV=2	12.3	46.28	6	1.12449	0.166431	12.8	38.61	7	0.887963	0.599641	15.43	43.88	8	0.956222	0.614998	0.989558	0.121736
tr|D3ZFQ8|D3ZFQ8_RAT	Cytochrome c-1 OS=Rattus norvegicus GN=Cyc1 PE=1 SV=3	15.31	40.49	7	1.00442	0.964868	16.35	55.21	8	1.02449	0.710179	16.52	46.32	8	0.940609	0.475377	0.989838	0.0437995
tr|A0A0H2UHF5|A0A0H2UHF5_RAT	ATP-sensitive inward rectifier potassium channel 10 OS=Rattus norvegicus GN=Kcnj10 PE=1 SV=1	8.24	28.04	4	0.992842	0.973167	6.61	34.66	4	1.04584	0.759882	10.14	30.42	5	0.931119	0.570483	0.989934	0.0574156
sp|Q8VIL3|ZWINT_RAT	ZW10 interactor OS=Rattus norvegicus GN=Zwint PE=1 SV=1	8.87	43.61	5	0.983418	0.899567	10.3	48.12	5	1.00329	0.986475	7.69	50	4	0.983487	0.934414	0.990064	0.0114514
tr|B4F7E7|B4F7E7_RAT	Membrane palmitoylated protein 5 OS=Rattus norvegicus GN=Mpp5 PE=1 SV=1	3.23	14.67	3	1.05103	0.707235	8.04	25.63	4	0.972694	0.830993	6.45	29.78	3	0.946623	0.579447	0.990114	0.0543373
sp|Q2TA68|OPA1_RAT	Dynamin-like 120 kDa protein, mitochondrial OS=Rattus norvegicus GN=Opa1 PE=1 SV=1	55.95	52.71	29	1.08468	0.148747	65.41	56.35	33	0.944382	0.329093	63.75	55	31	0.941353	0.23235	0.99014	0.0818921
tr|D3ZHV7|D3ZHV7_RAT	Serine dehydratase-like OS=Rattus norvegicus GN=Sdsl PE=1 SV=3	7	21.58	4	1.07851	0.465625	10.67	27.05	5	0.967811	0.677836	13.4	33.13	7	0.924358	0.384299	0.990228	0.0794851
sp|O35331|PDXK_RAT	Pyridoxal kinase OS=Rattus norvegicus GN=Pdxk PE=1 SV=1	22.65	53.53	13	1.03754	0.514412	23.28	59.94	12	0.922156	0.742532	21.16	54.49	11	1.01113	0.833576	0.990275	0.0604528
sp|Q6AYS8|DHB11_RAT	Estradiol 17-beta-dehydrogenase 11 OS=Rattus norvegicus GN=Hsd17b11 PE=2 SV=1	6.43	37.58	3	0.997257	0.991943	11.47	53.36	7	0.972685	0.696237	12.36	48.99	6	1.00089	0.990788	0.990277	0.0153432
tr|A0A0G2JVB0|A0A0G2JVB0_RAT	Solute carrier family 2, facilitated glucose transporter member 3-like OS=Rattus norvegicus GN=Slc2a3 PE=1 SV=1	10.94	21.41	6	0.892314	0.420545	10.7	15.76	5	1.15685	0.335937	10.36	18.99	5	0.92176	0.767521	0.990307	0.144977
tr|G3V6Y6|G3V6Y6_RAT	Alpha-1,4 glucan phosphorylase OS=Rattus norvegicus GN=Pygb PE=1 SV=2	98.38	58.98	48	1.05836	0	107.57	63.71	53	0.973034	0.490552	110.12	68.56	53	0.939576	0.423826	0.990323	0.0612493
tr|A0A0G2JU49|A0A0G2JU49_RAT	Metaxin 1 OS=Rattus norvegicus GN=Mtx1 PE=1 SV=1	2.86	37.15	2	1.00872	0	5.26	21.81	3	0.997274	0.978331	3.28	23.33	2	0.965332	0.813404	0.990442	0.022487
tr|D3ZBS2|D3ZBS2_RAT	Inter-alpha-trypsin inhibitor heavy chain H3 OS=Rattus norvegicus GN=Itih3 PE=1 SV=3	15.28	27.73	8	0.769756	0.0139053	15.97	29.54	8	1.10053	0.360899	12.41	28.86	6	1.10131	0.120852	0.990532	0.191198
tr|Q5RKJ4|Q5RKJ4_RAT	Farnesyltransferase, CAAX box, alpha OS=Rattus norvegicus GN=Fnta PE=1 SV=1	14.33	37.67	7	1.1317	0.0530079	10.59	25.99	6	0.890458	0.10517	14.46	35.28	7	0.950108	0.454097	0.990754	0.12565
tr|A0A096MJE6|A0A096MJE6_RAT	Tenascin R, isoform CRA_b OS=Rattus norvegicus GN=Tnr PE=1 SV=1	57.25	42.27	29	0.968099	0.643899	54.38	36.6	27	0.980229	0.740138	52.62	32.77	26	1.024	0.460265	0.990776	0.0294055
tr|F1MAA3|F1MAA3_RAT	Serine/threonine-protein phosphatase 2A 56 kDa regulatory subunit OS=Rattus norvegicus GN=Ppp2r5d PE=1 SV=2	11.75	27.9	6	0.981921	0.811557	10.86	21.18	6	1.06002	0.610268	13.91	35.13	8	0.930582	0.806358	0.990843	0.0651812
tr|B2GUZ9|B2GUZ9_RAT	Fam49b protein OS=Rattus norvegicus GN=Fam49b PE=1 SV=1	19.34	41.05	10	1.04145	0.491066	17.86	51.23	10	1.01318	0.839784	19.61	45.37	10	0.918456	0.832438	0.991028	0.0644185
sp|P17425|HMCS1_RAT	Hydroxymethylglutaryl-CoA synthase, cytoplasmic OS=Rattus norvegicus GN=Hmgcs1 PE=1 SV=1	30.86	61.92	15	1.2579	0.000118856	32.05	47.12	17	0.808129	0.217454	27.78	48.08	13	0.907206	0.0403168	0.99108	0.236327
tr|A0A0G2JWX1|A0A0G2JWX1_RAT	26S proteasome non-ATPase regulatory subunit 11 OS=Rattus norvegicus GN=Psmd11 PE=1 SV=1	31.64	49.4	16	1.0364	0.670305	31.84	55	16	1.01321	0.920334	29.14	52	15	0.92366	0.577498	0.991089	0.0595346
tr|A0A0G2JWH4|A0A0G2JWH4_RAT	1-acyl-sn-glycerol-3-phosphate acyltransferase delta OS=Rattus norvegicus GN=Agpat4 PE=4 SV=1	22.68	35.75	11	1.22669	0.00203864	20.94	41.55	12	0.858965	0.14315	23.79	40.34	12	0.887806	0.15978	0.991154	0.20449
tr|B0BN55|B0BN55_RAT	Uroporphyrinogen decarboxylase OS=Rattus norvegicus GN=Urod PE=1 SV=1	4.55	20.44	2	1.05575	0.665858	4.03	23.98	2	0.928135	0	8.02	30.52	4	0.989598	0.93479	0.99116	0.06382
sp|P35565|CALX_RAT	Calnexin OS=Rattus norvegicus GN=Canx PE=1 SV=1	22.15	36.21	11	1.06283	0.309589	29.08	41.62	14	0.923893	0.515232	31.55	40.78	16	0.98711	0.899621	0.991277	0.0695605
tr|Q6PDW4|Q6PDW4_RAT	Proteasome subunit beta type OS=Rattus norvegicus GN=Psmb1 PE=1 SV=1	10.76	62.5	7	0.904593	0.625261	8.36	73.33	5	0.928325	0.772987	11.33	55	6	1.14162	0.633912	0.991511	0.130534
sp|Q6AXV4|SAM50_RAT	Sorting and assembly machinery component 50 homolog OS=Rattus norvegicus GN=Samm50 PE=1 SV=1	13.9	47.33	7	0.916042	0.532277	14.89	51.81	9	0.983176	0.953553	14.39	42.86	6	1.07608	0.586546	0.991765	0.0803631
sp|Q9Z270|VAPA_RAT	Vesicle-associated membrane protein-associated protein A OS=Rattus norvegicus GN=Vapa PE=1 SV=3	17.24	48.59	9	0.977858	0.90743	14.98	56.22	7	0.994623	0.988689	15.79	57.83	8	1.00285	0.966904	0.991779	0.0127383
tr|D3ZZR9|D3ZZR9_RAT	Peptidylprolyl isomerase OS=Rattus norvegicus GN=Fkbp2 PE=1 SV=1	6.06	32.86	3	1.01511	0.880083	6.33	28.57	3	0.968856	0.889761	6.24	37.14	3	0.991386	0.968904	0.991785	0.0231317
tr|Q6AYD5|Q6AYD5_RAT	G1 to S phase transition 1 OS=Rattus norvegicus GN=Gspt1 PE=1 SV=1	15.11	23.74	8	1.13399	0.189842	16.07	31.6	9	0.862334	0.436478	16.44	22.17	9	0.979376	0.791327	0.991901	0.136263
tr|D4A4T0|D4A4T0_RAT	STIP1 homology and U-Box containing protein 1, isoform CRA_b OS=Rattus norvegicus GN=Stub1 PE=1 SV=1	7.35	42.43	5	0.998348	0.983272	9.37	64.8	4	0.994652	0.988417	6.9	58.55	3	0.982772	0.866016	0.991924	0.00813856
tr|A0A0G2JWM2|A0A0G2JWM2_RAT	NAD-dependent protein deacetylase OS=Rattus norvegicus GN=Sirt2 PE=1 SV=1	42.77	59.54	25	1.02828	0.510018	50	69.85	29	1.04432	0.392076	51.13	73.2	29	0.903267	0.0566893	0.991954	0.077223
sp|P26772|CH10_RAT	10 kDa heat shock protein, mitochondrial OS=Rattus norvegicus GN=Hspe1 PE=1 SV=3	21.87	84.31	11	1.03114	0.831147	24.26	82.35	13	1.02893	0.796503	24.26	77.45	12	0.916712	0.56702	0.992263	0.0654386
tr|A0A0G2JSL0|A0A0G2JSL0_RAT	Proteasome subunit beta type OS=Rattus norvegicus GN=LOC100360846 PE=3 SV=1	7.01	23.53	4	0.966303	0.723706	8.49	36.13	5	1.03463	0.77762	9.01	32.77	5	0.975876	0.864995	0.992271	0.0369988
sp|Q00981|UCHL1_RAT	Ubiquitin carboxyl-terminal hydrolase isozyme L1 OS=Rattus norvegicus GN=Uchl1 PE=1 SV=2	23.22	69.51	15	1.05738	0.851746	24.69	69.06	19	0.967936	0.511504	25.09	68.16	19	0.952775	0.33389	0.992696	0.0565261
tr|B5DF65|B5DF65_RAT	Biliverdin reductase B OS=Rattus norvegicus GN=Blvrb PE=1 SV=1	9.19	42.72	7	0.81311	0.156495	8.8	46.6	6	1.05148	0.390814	8.4	56.31	4	1.11372	0.403832	0.99277	0.158672
sp|P63312|TYB10_RAT	Thymosin beta-10 OS=Rattus norvegicus GN=Tmsb10 PE=1 SV=2	2.9	84.09	2	1.15246	0.448255	2.85	47.73	2	1.03445	0.825282	2.52	47.73	2	0.791963	0.497327	0.992958	0.183797
sp|Q641Y8|DDX1_RAT	ATP-dependent RNA helicase DDX1 OS=Rattus norvegicus GN=Ddx1 PE=1 SV=1	14.1	32.57	7	1.03568	0.804918	21.23	34.86	10	0.979982	0.874911	18.23	38.38	10	0.964236	0.744017	0.993301	0.0375398
sp|P84817|FIS1_RAT	Mitochondrial fission 1 protein OS=Rattus norvegicus GN=Fis1 PE=1 SV=1	10.03	46.71	5	1.12371	0.164005	10	42.11	5	0.957321	0.558443	10.01	40.13	5	0.898988	0.199746	0.99334	0.116612
sp|D3ZBE5|NEK7_RAT	Serine/threonine-protein kinase Nek7 OS=Rattus norvegicus GN=Nek7 PE=2 SV=1	4.71	30.13	3	0.907714	0.75206	12.73	38.74	6	0.863738	0.559253	14.44	55.63	7	1.20899	0.206139	0.993481	0.187928
sp|P40307|PSB2_RAT	Proteasome subunit beta type-2 OS=Rattus norvegicus GN=Psmb2 PE=1 SV=1	8.74	47.26	6	0.676969	0.571166	8.34	48.26	4	1.09707	0.467273	10.09	37.81	5	1.20642	0.0435592	0.993488	0.279513
sp|Q03346|MPPB_RAT	Mitochondrial-processing peptidase subunit beta OS=Rattus norvegicus GN=Pmpcb PE=1 SV=3	9.22	24.74	5	0.88228	0.0929711	8.72	27.4	5	1.16204	0.24408	6.96	28.83	4	0.936251	0.463909	0.993524	0.148414
sp|Q09426|CGT_RAT	2-hydroxyacylsphingosine 1-beta-galactosyltransferase OS=Rattus norvegicus GN=Ugt8 PE=1 SV=1	23.9	34.2	12	1.1797	0.045806	25.39	37.15	12	0.928991	0.346024	21.25	37.89	10	0.87198	0.225122	0.993558	0.163707
sp|P58295|SC6A5_RAT	Sodium- and chloride-dependent glycine transporter 2 OS=Rattus norvegicus GN=Slc6a5 PE=1 SV=2	25.35	30.16	14	0.983409	0.810442	29.92	26.66	15	1.07486	0.366977	28.94	31.54	15	0.922639	0.394738	0.993638	0.0766266
sp|Q68FP1|GELS_RAT	Gelsolin OS=Rattus norvegicus GN=Gsn PE=1 SV=1	44.95	45.9	21	1.1253	0.00535631	48.53	49.36	25	0.927548	0.298201	47	46.41	22	0.928167	0.162325	0.993671	0.113993
tr|F1LNF7|F1LNF7_RAT	Isocitrate dehydrogenase [NAD] subunit, mitochondrial OS=Rattus norvegicus GN=Idh3a PE=1 SV=2	31.42	58.9	16	0.975182	0.763383	33.76	52.62	16	1.04073	0.542679	35.79	50.26	19	0.965345	0.580574	0.993752	0.0409797
tr|D4A0X3|D4A0X3_RAT	BTB (POZ) domain-containing 8 OS=Rattus norvegicus GN=Btbd8 PE=1 SV=2	2.94	24.07	3	0.936486	0.516162	3.92	15.22	2	1.03203	0.852308	3.43	23.99	2	1.01285	0.891323	0.993789	0.0505432
sp|P28480|TCPA_RAT	T-complex protein 1 subunit alpha OS=Rattus norvegicus GN=Tcp1 PE=1 SV=1	44.46	55.4	22	1.01939	0.693231	47.87	60.25	24	1.01547	0.942193	47.88	54.86	24	0.947259	0.499278	0.994039	0.0405601
sp|Q64428|ECHA_RAT	Trifunctional enzyme subunit alpha, mitochondrial OS=Rattus norvegicus GN=Hadha PE=1 SV=2	56.13	50.46	28	0.976267	0.629372	64.58	62.25	33	1.02429	0.728635	60.39	56.23	31	0.981829	0.817891	0.99413	0.0262699
sp|P06686|AT1A2_RAT	Sodium/potassium-transporting ATPase subunit alpha-2 OS=Rattus norvegicus GN=Atp1a2 PE=1 SV=1	129.17	61.08	69	0.992159	0.83956	127.75	62.25	65	1.0471	0.205269	127.62	60.2	66	0.943844	0.253252	0.994369	0.0516662
tr|Q5XI77|Q5XI77_RAT	Annexin OS=Rattus norvegicus GN=Anxa11 PE=1 SV=1	18.77	41.35	11	1.05976	0.204091	23.3	40.76	11	0.934266	0.832278	27.79	45.53	14	0.989277	0.969074	0.994435	0.0629073
tr|Q6MGC4|Q6MGC4_RAT	H2-K region expressed gene 2, rat orthologue OS=Rattus norvegicus GN=Pfdn6 PE=1 SV=1	4.51	52.76	2	0.913895	0.712674	6.91	74.8	4	1.23121	0.0930366	6.95	62.2	4	0.838249	0.753351	0.99445	0.208496
tr|D4ADE5|D4ADE5_RAT	Histone-lysine N-methyltransferase SETD7 OS=Rattus norvegicus GN=Setd7 PE=1 SV=1	6.05	27.6	3	1.01574	0.907815	12.74	32.24	7	0.930247	0.342044	13.89	31.69	7	1.03751	0.766824	0.994498	0.0566976
tr|Q5M9H2|Q5M9H2_RAT	Acyl-Coenzyme A dehydrogenase, very long chain OS=Rattus norvegicus GN=Acadvl PE=1 SV=1	23.9	43.66	12	0.926784	0.725622	30.06	49.47	15	0.990309	0.902564	27.07	48.55	13	1.06641	0.308967	0.9945	0.0699054
tr|D4AEP0|D4AEP0_RAT	Adenylosuccinate synthetase isozyme 2 OS=Rattus norvegicus GN=Adss PE=1 SV=1	20.33	37.72	10	1.01301	0.861491	18.84	40.13	9	1.0141	0.772426	15.58	35.75	8	0.956495	0.499575	0.994533	0.0329464
tr|D3ZCT7|D3ZCT7_RAT	Sec23 homolog B, coat complex II component OS=Rattus norvegicus GN=Sec23b PE=1 SV=2	11.24	23.08	6	0.828009	0.702787	13.87	19.3	7	1.04346	0.745294	11.39	21.77	6	1.11229	0.50258	0.994586	0.14831
sp|Q3B7D0|HEM6_RAT	Oxygen-dependent coproporphyrinogen-III oxidase, mitochondrial OS=Rattus norvegicus GN=Cpox PE=1 SV=1	7.56	40.41	4	1.09652	0.573756	1.92	38.15	2	0.749703	0.483051	5.25	38.15	3	1.13759	0	0.994605	0.213083
tr|F1M5M9|F1M5M9_RAT	SLIT-ROBO Rho GTPase-activating protein 3 OS=Rattus norvegicus GN=Srgap3 PE=1 SV=2	9.67	28.48	5	0.952736	0.515046	11.3	38.22	7	1.04799	0.735782	17.22	26.84	8	0.98318	0.896108	0.994635	0.0486483
tr|G3V9M3|G3V9M3_RAT	RCG28460 OS=Rattus norvegicus GN=Wdr47 PE=1 SV=1	14.26	31.81	8	0.854391	0.574621	16.45	36.05	8	1.07964	0.545059	17.52	28.56	10	1.04995	0.815209	0.994659	0.12238
sp|B0BN18|PFD2_RAT	Prefoldin subunit 2 OS=Rattus norvegicus GN=Pfdn2 PE=2 SV=1	8.26	57.79	5	0.974013	0.805521	11.09	62.34	6	0.965149	0.7734	11.26	55.84	6	1.04508	0.789028	0.994746	0.0438118
sp|Q6RUV5|RAC1_RAT	Ras-related C3 botulinum toxin substrate 1 OS=Rattus norvegicus GN=Rac1 PE=1 SV=1	15.78	46.88	8	1.03346	0.613463	17.87	46.88	9	0.951779	0.421671	17.96	50	9	0.999227	0.995085	0.994822	0.0410184
tr|Q3MHS9|Q3MHS9_RAT	Chaperonin containing Tcp1, subunit 6A (Zeta 1) OS=Rattus norvegicus GN=Cct6a PE=1 SV=1	31.53	45.76	16	1.02013	0.777071	32.69	49.53	16	0.994146	0.970886	29.36	47.08	14	0.970358	0.816379	0.994877	0.0248925
sp|Q63228|GMFB_RAT	Glia maturation factor beta OS=Rattus norvegicus GN=Gmfb PE=1 SV=2	16.25	51.41	8	1.05201	0.383617	13.14	59.86	8	1.02535	0.920434	15	59.15	7	0.907513	0.704433	0.994957	0.0768932
tr|G3V6S5|G3V6S5_RAT	C-1-tetrahydrofolate synthase, cytoplasmic OS=Rattus norvegicus GN=Mthfd1 PE=1 SV=1	48.49	38.72	24	1.09799	0.530651	50.1	38.5	24	0.964545	0.779244	49.98	37.54	26	0.923078	0.549242	0.995203	0.0913951
tr|F1LP82|F1LP82_RAT	Ras-related protein Rab-2A OS=Rattus norvegicus GN=Rab2a PE=1 SV=3	27.83	77.67	15	1.11468	0.802839	25.22	81.07	12	1.00029	0.998287	25.97	80.58	13	0.87067	0.502487	0.995213	0.122083
tr|D4ACG7|D4ACG7_RAT	Copine 6 OS=Rattus norvegicus GN=Cpne6 PE=1 SV=2	24.1	42.91	13	0.948117	0.56383	26.91	46.5	14	1.0366	0.687305	29.86	46.5	16	1.00126	0.987599	0.995326	0.0445391
tr|A0A0G2K3Q6|A0A0G2K3Q6_RAT	Fructose-bisphosphate aldolase OS=Rattus norvegicus GN=Aldoc PE=1 SV=1	71.72	89.81	42	0.973319	0.582649	75.97	90.08	42	1.01082	0.774662	71.25	90.08	40	1.00188	0.974854	0.99534	0.0195874
sp|P20651|PP2BB_RAT	Serine/threonine-protein phosphatase 2B catalytic subunit beta isoform OS=Rattus norvegicus GN=Ppp3cb PE=1 SV=1	24.56	33.33	12	1.06204	0.490138	26.34	46.67	13	1.01756	0.83502	23.46	38.1	12	0.906465	0.349544	0.995354	0.0801291
sp|P54313|GBB2_RAT	Guanine nucleotide-binding protein G(I)/G(S)/G(T) subunit beta-2 OS=Rattus norvegicus GN=Gnb2 PE=1 SV=4	22.51	55.29	12	0.968601	0.89069	22.26	41.18	11	0.985447	0.87662	20.06	42.94	10	1.03211	0.733583	0.995387	0.0329022
sp|Q5XHZ0|TRAP1_RAT	Heat shock protein 75 kDa, mitochondrial OS=Rattus norvegicus GN=Trap1 PE=1 SV=1	35.96	51.98	19	1.00003	1	37.58	38.95	19	0.960309	0.743625	29.19	42.63	16	1.02583	0.72012	0.995389	0.0330051
tr|A0A0G2JV31|A0A0G2JV31_RAT	X-prolyl aminopeptidase (Aminopeptidase P) 1, soluble, isoform CRA_a OS=Rattus norvegicus GN=Xpnpep1 PE=1 SV=1	19.9	34.68	10	1.03539	0.658801	23.24	36.34	11	0.967005	0.859853	22.57	46.25	11	0.984063	0.922348	0.995486	0.0355954
tr|F7EPH4|F7EPH4_RAT	Pyrophosphatase (inorganic) 1 OS=Rattus norvegicus GN=Ppa1 PE=1 SV=1	17.05	48.1	9	1.0202	0.820172	20.06	79.58	10	0.95806	0.688042	20.28	80.62	10	1.00853	0.901876	0.995595	0.0330263
sp|P21575|DYN1_RAT	Dynamin-1 OS=Rattus norvegicus GN=Dnm1 PE=1 SV=2	103.42	57.75	51	1.06435	0.313689	106.02	58.45	54	1.01148	0.852323	105.18	64.93	52	0.911259	0.0812138	0.995696	0.0777552
tr|D3ZF13|D3ZF13_RAT	Acyl carrier protein OS=Rattus norvegicus GN=Ndufab1 PE=1 SV=1	5.51	42.31	3	1.02136	0.881348	4.84	23.08	3	1.06341	0.711706	4.61	28.85	3	0.90252	0.527274	0.995762	0.0834414
sp|Q6AY17|AB17B_RAT	Protein ABHD17B OS=Rattus norvegicus GN=Abhd17b PE=1 SV=1	5.63	33.68	3	1.04554	0.739205	3	27.78	2	0.992054	0.970085	4.39	46.53	3	0.949858	0.763727	0.995817	0.0479511
sp|Q04970|RASN_RAT	GTPase NRas OS=Rattus norvegicus GN=Nras PE=1 SV=1	17.15	60.32	9	0.980092	0.873342	15.98	52.91	9	0.924662	0.651837	20.4	58.2	12	1.08325	0.607416	0.996	0.0804805
tr|A0A0G2JTH4|A0A0G2JTH4_RAT	Leukocyte surface antigen CD47 OS=Rattus norvegicus GN=Cd47 PE=1 SV=1	7.41	19.5	5	1.07817	0.685916	6.96	16.71	4	1.01632	0.888114	6.24	18.66	4	0.893862	0.520158	0.996115	0.0937985
sp|Q9ERB4|CSPG2_RAT	Versican core protein (Fragments) OS=Rattus norvegicus GN=Vcan PE=2 SV=2	25.13	15.3	15	0.958075	0.698063	26.04	13.81	15	0.976892	0.960057	26.32	14.72	15	1.0541	0.87281	0.996357	0.050887
sp|P32089|TXTP_RAT	Tricarboxylate transport protein, mitochondrial OS=Rattus norvegicus GN=Slc25a1 PE=1 SV=1	20.48	38.59	11	1.05033	0.507471	18.84	49.52	10	1.03585	0.72962	20.43	43.73	10	0.904321	0.240257	0.996835	0.0804463
sp|Q9EST6|AN32B_RAT	Acidic leucine-rich nuclear phosphoprotein 32 family member B OS=Rattus norvegicus GN=Anp32b PE=1 SV=1	11.49	26.47	7	0.923621	0.564169	7.98	23.16	5	0.936497	0.810793	11.92	26.47	6	1.13059	0.489447	0.996902	0.115955
tr|M0RC57|M0RC57_RAT	Small ArfGAP 1 OS=Rattus norvegicus GN=Smap1 PE=1 SV=1	4.29	19.55	2	0.852232	0.167597	4.56	20.45	3	0.97405	0.792722	5.42	23.18	3	1.1648	0.487579	0.997029	0.157548
tr|F1LSE6|F1LSE6_RAT	Liprin-alpha-3 OS=Rattus norvegicus GN=Ppfia3 PE=1 SV=2	25.06	41.28	12	1.06325	0.836867	32.93	43.26	18	1.02697	0.819524	26.6	39.64	13	0.901272	0.601474	0.997164	0.0850036
sp|D4A4T9|CHRD1_RAT	Cysteine and histidine-rich domain-containing protein 1 OS=Rattus norvegicus GN=Chordc1 PE=3 SV=1	21.26	52.27	11	1.08959	0.479105	15.85	55.89	8	0.888651	0.264343	12.4	53.17	7	1.01424	0.863107	0.997494	0.101513
tr|A0A0G2K1D2|A0A0G2K1D2_RAT	RAP1, GTP-GDP dissociation stimulator 1 (Predicted), isoform CRA_a OS=Rattus norvegicus GN=Rap1gds1 PE=1 SV=1	34.86	54.65	20	1.02724	0.707808	40.44	57.31	22	0.971376	0.5187	42.57	61.67	23	0.993882	0.900847	0.997498	0.0281047
sp|P00388|NCPR_RAT	NADPH--cytochrome P450 reductase OS=Rattus norvegicus GN=Por PE=1 SV=3	16.02	35.55	8	0.987665	0.921636	21.69	33.04	12	1.00052	0.994301	21.13	35.1	11	1.00452	0.960251	0.997571	0.00880928
tr|G3V8A5|G3V8A5_RAT	Vacuolar protein sorting-associated protein 35 OS=Rattus norvegicus GN=Vps35 PE=1 SV=1	28.27	39.95	13	1.01875	0.70151	28.02	36.43	15	0.956576	0.570771	27.83	39.57	15	1.01761	0.829463	0.997646	0.0355725
sp|Q75Q39|TOM70_RAT	Mitochondrial import receptor subunit TOM70 OS=Rattus norvegicus GN=Tomm70 PE=1 SV=1	27.86	47.05	14	1.08808	0.264013	42.1	54.75	19	0.996534	0.91823	36.71	50	18	0.908431	0.0117037	0.997681	0.0898286
sp|B0BN85|SGT1_RAT	Protein SGT1 homolog OS=Rattus norvegicus GN=Sugt1 PE=2 SV=1	23.01	52.08	12	1.02808	0.889082	18.43	63.69	11	1.02383	0.665469	16.62	54.17	8	0.941693	0.766323	0.997867	0.0486947
sp|P12346|TRFE_RAT	Serotransferrin OS=Rattus norvegicus GN=Tf PE=1 SV=3	86.69	58.6	44	0.923012	0	87.91	61.46	46	0.795371	0	85.08	67.05	42	1.27536	0	0.997914	0.248606
sp|Q3B7U9|FKBP8_RAT	Peptidyl-prolyl cis-trans isomerase FKBP8 OS=Rattus norvegicus GN=Fkbp8 PE=2 SV=1	14.03	30.02	8	1.06809	0.686423	12.05	33.25	6	0.973489	0.815822	12.13	45.41	6	0.952203	0.675441	0.997927	0.0616866
tr|M0R9X8|M0R9X8_RAT	Cytoplasmic dynein 1 heavy chain 1 OS=Rattus norvegicus GN=Dync1h1 PE=1 SV=2	254.1	52.48	162	1.10518	0.00712862	263.73	51.81	168	0.952269	0.136601	254.96	54.2	160	0.936347	0.126611	0.997932	0.0932192
tr|A0A0G2JUC7|A0A0G2JUC7_RAT	Dynactin subunit 2 OS=Rattus norvegicus GN=Dctn2 PE=1 SV=1	45.55	59.29	23	0.965493	0.780676	46.33	59.76	25	1.01509	0.70601	43.25	59.52	23	1.01368	0.783179	0.998087	0.0282355
sp|P00507|AATM_RAT	Aspartate aminotransferase, mitochondrial OS=Rattus norvegicus GN=Got2 PE=1 SV=2	56.48	79.07	29	1.05596	0.305187	52.81	76.98	26	0.996307	0.953369	50.89	73.26	26	0.942406	0.5565	0.998225	0.0568018
tr|A0A0G2K7Y2|A0A0G2K7Y2_RAT	Oxidation resistance protein 1 OS=Rattus norvegicus GN=Oxr1 PE=1 SV=1	45.43	47.42	23	1.02302	0.849945	51.23	47.31	25	1.03029	0.554955	48.5	50.06	24	0.941364	0.325864	0.998226	0.0493782
tr|A0A0G2K865|A0A0G2K865_RAT	Tumor protein D52 OS=Rattus norvegicus GN=Tpd52 PE=1 SV=1	21.25	46.56	11	0.958963	0.48691	16.53	56.68	8	1.04076	0.659089	13.25	41.3	7	0.994977	0.956984	0.998234	0.040996
sp|Q6P502|TCPG_RAT	T-complex protein 1 subunit gamma OS=Rattus norvegicus GN=Cct3 PE=1 SV=1	53.57	65.14	26	1.02417	0.793782	47.98	72.11	24	0.95294	0.413976	48.98	61.65	25	1.01767	0.733886	0.998258	0.0393805
tr|D3ZX38|D3ZX38_RAT	Prefoldin 1 (Predicted) OS=Rattus norvegicus GN=Pfdn1 PE=1 SV=1	7.92	59.02	4	0.983426	0.886107	3.92	45.9	2	1.00561	0.935911	7.87	43.44	4	1.00619	0.945813	0.998408	0.012978
tr|Q499P2|Q499P2_RAT	Leukotriene A(4) hydrolase OS=Rattus norvegicus GN=Lta4h PE=1 SV=1	46.83	50.41	24	1.07377	0.484747	46.26	56.46	23	0.947066	0.609442	51.15	61.21	24	0.974535	0.629185	0.998458	0.0666555
sp|Q9ER34|ACON_RAT	Aconitate hydratase, mitochondrial OS=Rattus norvegicus GN=Aco2 PE=1 SV=2	85.6	61.67	45	1.0196	0.55315	100.75	64.36	54	1.02061	0.588328	102.03	64.36	56	0.955388	0.417414	0.998533	0.037368
sp|Q6AYQ8|FAHD1_RAT	Acylpyruvase FAHD1, mitochondrial OS=Rattus norvegicus GN=Fahd1 PE=1 SV=1	4.03	41.18	2	1.01081	0.896093	6.05	56.11	3	1.06138	0.640226	6.05	49.32	3	0.923589	0.494956	0.998591	0.0697007
tr|F1LLX6|F1LLX6_RAT	Calcium-dependent secretion activator 1 OS=Rattus norvegicus GN=Cadps PE=1 SV=3	53.04	44.56	25	1.01503	0	57.91	48.91	29	1.04599	0	59.51	49.35	30	0.934954	0	0.998657	0.0572989
tr|Q5U302|Q5U302_RAT	Catenin (Cadherin associated protein), alpha 1 OS=Rattus norvegicus GN=Ctnna1 PE=1 SV=1	39.26	46.48	19	1.05379	0.389028	38.22	50.77	19	0.834633	0.340892	44.41	46.26	22	1.10765	0.268447	0.998693	0.144609
sp|P31596|EAA2_RAT	Excitatory amino acid transporter 2 OS=Rattus norvegicus GN=Slc1a2 PE=1 SV=2	34.42	33.33	18	1.06352	0.526248	35.46	35.6	19	0.992984	0.911971	33.28	35.78	16	0.940238	0.406631	0.998913	0.0618527
sp|P18395|CSDE1_RAT	Cold shock domain-containing protein E1 OS=Rattus norvegicus GN=Csde1 PE=2 SV=1	17.1	35.84	8	1.07657	0.691054	16.18	34.21	8	0.99004	0.924851	17.84	39.85	9	0.931019	0.59703	0.999209	0.0732057
sp|P62282|RS11_RAT	40S ribosomal protein S11 OS=Rattus norvegicus GN=Rps11 PE=1 SV=3	7.8	68.35	4	1.03806	0.730184	7.88	62.03	4	0.919874	0.622201	7.43	62.03	4	1.0435	0.773314	1.00048	0.0698586
tr|B5DFK6|B5DFK6_RAT	Adaptor-related protein complex 3, delta 1 subunit OS=Rattus norvegicus GN=Ap3d1 PE=1 SV=1	25.4	26.99	14	1.02641	0.82338	21.03	28.99	12	1.04209	0.75794	26.39	28.9	13	0.93333	0.597202	1.00061	0.0587911
sp|P52873|PYC_RAT	Pyruvate carboxylase, mitochondrial OS=Rattus norvegicus GN=Pc PE=1 SV=2	78.52	57.22	41	1.05073	0.349822	77.19	61.54	38	0.993966	0.912036	70.42	51.44	35	0.957178	0.38062	1.00063	0.0471311
sp|O35509|RB11B_RAT	Ras-related protein Rab-11B OS=Rattus norvegicus GN=Rab11b PE=1 SV=4	21.15	58.26	11	1.02775	0.630537	18.33	68.81	9	0.988967	0.815005	21.01	72.02	11	0.985234	0.806845	1.00065	0.0235406
tr|A0A0G2K872|A0A0G2K872_RAT	Cell adhesion molecule 3 OS=Rattus norvegicus GN=Cadm3 PE=1 SV=1	18	36.28	9	1.11247	0.280035	20.5	41.16	10	0.95836	0.596604	20.58	39.53	11	0.931229	0.370955	1.00068	0.0977503
sp|P14659|HSP72_RAT	Heat shock-related 70 kDa protein 2 OS=Rattus norvegicus GN=Hspa2 PE=1 SV=2	54.43	55.92	26	1.07845	0.4299	53.34	59.72	26	0.878117	0.273252	54.58	61.14	26	1.04554	0.427064	1.0007	0.107429
sp|P63086|MK01_RAT	Mitogen-activated protein kinase 1 OS=Rattus norvegicus GN=Mapk1 PE=1 SV=3	26.13	54.19	13	1.02677	0.779158	26.88	48.88	13	0.997465	0.973771	26.03	52.79	13	0.977968	0.79483	1.00074	0.0245663
tr|A0A140TAJ5|A0A140TAJ5_RAT	Phosphatidylinositol 4-kinase alpha OS=Rattus norvegicus GN=Pi4ka PE=1 SV=1	20.56	26.52	11	1.10667	0.574569	32.99	27.2	17	0.936521	0.646529	25.93	27.1	13	0.959267	0.555738	1.00082	0.0923701
sp|P47728|CALB2_RAT	Calretinin OS=Rattus norvegicus GN=Calb2 PE=1 SV=1	32.34	54.98	16	0.996865	0.973189	33.43	64.58	16	1.03164	0.725675	34.8	59.41	17	0.974337	0.740424	1.00095	0.0288661
tr|D4A5G8|D4A5G8_RAT	Pyruvate dehydrogenase E1 component subunit alpha OS=Rattus norvegicus GN=Pdha1l1 PE=1 SV=3	50.71	73.59	26	1.02727	0.735289	45.86	71.28	24	0.993662	0.945877	52.23	65.9	27	0.982144	0.844407	1.00103	0.0234476
sp|P97584|PTGR1_RAT	Prostaglandin reductase 1 OS=Rattus norvegicus GN=Ptgr1 PE=2 SV=3	5.1	26.75	3	1.07241	0.917227	4.51	23.1	3	1.11454	0.776276	7.1	23.1	4	0.816519	0.335512	1.00116	0.161283
sp|Q499N5|ACSF2_RAT	Acyl-CoA synthetase family member 2, mitochondrial OS=Rattus norvegicus GN=Acsf2 PE=2 SV=1	32.17	42.6	16	1.02002	0.796494	41.64	54.15	21	1.00448	0.936489	36.35	64.55	19	0.979301	0.818165	1.00127	0.0205508
sp|P50503|F10A1_RAT	Hsc70-interacting protein OS=Rattus norvegicus GN=St13 PE=1 SV=1	21.81	41.85	12	1.04472	0.640578	17.94	41.3	10	0.960064	0.609583	23.99	42.66	13	0.999317	0.994143	1.00137	0.0423641
tr|A0A0G2JYB1|A0A0G2JYB1_RAT	F-actin-capping protein subunit beta OS=Rattus norvegicus GN=Capzb PE=1 SV=1	26.02	55.74	14	1.01854	0.90872	24.98	56.42	12	0.912069	0.315457	24.66	55.74	11	1.0742	0.554883	1.0016	0.0823823
tr|Q5PQZ9|Q5PQZ9_RAT	NADH dehydrogenase [ubiquinone] 1 subunit C2 OS=Rattus norvegicus GN=Ndufc2 PE=1 SV=1	5.26	41.67	4	0.997449	0.975857	7.16	34.17	4	1.03391	0.888551	5.48	44.17	3	0.974159	0.882784	1.00184	0.0301153
sp|P04906|GSTP1_RAT	Glutathione S-transferase P OS=Rattus norvegicus GN=Gstp1 PE=1 SV=2	25.37	65.24	14	1.08262	0.169172	20.14	65.24	10	0.926041	0.482415	24	62.86	13	0.99711	0.971487	1.00192	0.078399
sp|Q9JHU0|DPYL5_RAT	Dihydropyrimidinase-related protein 5 OS=Rattus norvegicus GN=Dpysl5 PE=1 SV=1	62	74.47	29	1.15279	0.0105356	63.05	75.71	32	0.880596	0.000102833	61.83	72.52	32	0.972447	0.539286	1.00194	0.138473
tr|D3ZIP8|D3ZIP8_RAT	Endonuclease domain-containing 1 OS=Rattus norvegicus GN=Endod1 PE=4 SV=2	13.62	33.72	7	1.02732	0.914172	18	41.79	9	0.877462	0.185453	18.31	34.29	9	1.10108	0.211054	1.00196	0.113948
sp|Q63357|MYO1D_RAT	Unconventional myosin-Id OS=Rattus norvegicus GN=Myo1d PE=1 SV=3	61.42	62.33	30	1.16156	0.155231	59.44	57.55	29	0.97728	0.623231	59.7	55.77	30	0.867295	0.00191232	1.00204	0.148686
tr|A0A0G2K8N9|A0A0G2K8N9_RAT	NIMA-related kinase 9 OS=Rattus norvegicus GN=Nek9 PE=1 SV=1	10.53	22.03	6	1.006	0.979875	8.19	17.33	4	0.917277	0.311881	12.1	19	6	1.08306	0.4382	1.00211	0.0829583
sp|Q91Y81|SEPT2_RAT	Septin-2 OS=Rattus norvegicus GN=Sept2 PE=1 SV=1	31.73	71.19	15	0.966668	0.819374	31.28	63.99	16	1.03307	0.50236	34.08	78.12	19	1.00695	0.926212	1.00223	0.0334529
tr|Q5XIH3|Q5XIH3_RAT	NADH dehydrogenase [ubiquinone] flavoprotein 1, mitochondrial OS=Rattus norvegicus GN=Ndufv1 PE=1 SV=1	37.46	68.1	19	1.08465	0.0762352	43.69	73.28	23	0.994483	0.981958	45.15	67.89	23	0.927669	0.689171	1.00227	0.0787778
sp|P13668|STMN1_RAT	Stathmin OS=Rattus norvegicus GN=Stmn1 PE=1 SV=2	12.57	61.07	6	1.02579	0.986186	15.37	69.8	8	1.0044	0.960103	18.57	74.5	10	0.97661	0.855362	1.00227	0.0246606
sp|O88767|PARK7_RAT	Protein/nucleic acid deglycase DJ-1 OS=Rattus norvegicus GN=Park7 PE=1 SV=1	25.32	80.95	14	1.05241	0.595629	27.36	79.89	13	1.01763	0.832181	26.38	77.78	13	0.936816	0.698552	1.00228	0.0593032
tr|A0A0H2UHQ0|A0A0H2UHQ0_RAT	4F2 cell-surface antigen heavy chain OS=Rattus norvegicus GN=Slc3a2 PE=1 SV=1	31.87	37.28	17	1.01055	0.832777	27.16	36.57	13	1.09169	0.0469408	27.61	39.75	13	0.905096	0.14506	1.00244	0.0935617
tr|Q32PX6|Q32PX6_RAT	Ras homolog family member G OS=Rattus norvegicus GN=Rhog PE=1 SV=1	23.14	64.4	12	1.09386	0.108107	22.64	59.16	11	0.982291	0.768023	23.62	64.92	12	0.931344	0.24795	1.0025	0.0831204
tr|D3ZAP9|D3ZAP9_RAT	Glycerol-3-phosphate dehydrogenase [NAD(+)] OS=Rattus norvegicus GN=Gpd1l PE=1 SV=1	16.2	40.17	8	1.09992	0.159422	19.44	44.73	10	1.00428	0.958409	19.01	41.03	9	0.90378	0.437794	1.00266	0.0980811
tr|A0A0H2UHB7|A0A0H2UHB7_RAT	Anion exchange protein OS=Rattus norvegicus GN=Slc4a4 PE=1 SV=1	32.39	30.66	16	0.977353	0.748622	29.76	34.12	15	1.04535	0.608864	30.96	31.76	15	0.98559	0.931502	1.00276	0.0371071
tr|F1M3B1|F1M3B1_RAT	Ankyrin repeat domain-containing protein 29-like OS=Rattus norvegicus GN=LOC108348154 PE=4 SV=2	8.11	44.53	5	0.940875	0.518545	9.23	31.39	5	0.918106	0.775368	5.81	44.89	3	1.14947	0.42257	1.00282	0.127515
sp|P08592|A4_RAT	Amyloid-beta A4 protein OS=Rattus norvegicus GN=App PE=1 SV=2	10.39	23.77	5	1.19053	0.0543985	18.53	31.17	9	0.915912	0.538143	16.3	34.42	8	0.902047	0.569057	1.00283	0.162699
tr|G3V9D1|G3V9D1_RAT	Phosphoinositide phospholipase C OS=Rattus norvegicus GN=Plcd1 PE=1 SV=1	8.93	29.5	5	0.983232	0.814929	11.02	36.9	6	0.990625	0.874829	10.85	27.51	6	1.03463	0.781413	1.00283	0.0277896
tr|A0A0G2JYC6|A0A0G2JYC6_RAT	RCG62582, isoform CRA_c OS=Rattus norvegicus GN=Ubap2l PE=1 SV=1	4.17	9.831	2	1.18123	0.21869	4.51	7.959	3	0.86721	0.459355	6.22	10.67	3	0.960142	0.92991	1.00286	0.161312
tr|A0A0G2K531|A0A0G2K531_RAT	Glutathione peroxidase OS=Rattus norvegicus GN=Gpx3 PE=1 SV=1	8.04	36	4	0.83801	0.248941	7.87	41.33	4	0.919077	0.3488	6.03	32	3	1.25157	0.349203	1.00288	0.219146
tr|D3ZB78|D3ZB78_RAT	PHD finger protein 24 OS=Rattus norvegicus GN=Phf24 PE=1 SV=1	24.94	54.27	13	0.968626	0.792146	24.94	52.07	12	1.05181	0.74781	24.21	56.47	12	0.988258	0.944765	1.0029	0.04348
tr|D3ZCS3|D3ZCS3_RAT	Poly(rC)-binding protein 4 OS=Rattus norvegicus GN=Pcbp4 PE=4 SV=1	4.98	17.87	3	1.08022	0.851983	8.41	24.81	4	0.945133	0.820239	8.06	18.86	4	0.983427	0.958648	1.00293	0.0696226
sp|P06687|AT1A3_RAT	Sodium/potassium-transporting ATPase subunit alpha-3 OS=Rattus norvegicus GN=Atp1a3 PE=1 SV=2	128.11	59.53	69	1.07079	0.0828806	122.79	62.49	65	0.997671	0.958014	125.2	60.61	67	0.940589	0.253317	1.00302	0.0652657
sp|Q4V8E4|CFA36_RAT	Cilia- and flagella-associated protein 36 OS=Rattus norvegicus GN=Cfap36 PE=1 SV=1	9.55	34.99	6	0.976168	0.72745	13.33	58.6	8	1.04809	0.848837	10.25	44.02	6	0.984793	0.905714	1.00302	0.0392741
sp|P50554|GABT_RAT	4-aminobutyrate aminotransferase, mitochondrial OS=Rattus norvegicus GN=Abat PE=1 SV=3	54.8	73.4	31	1.0406	0.444821	60.64	79.2	32	1.0321	0.468818	56.34	67.4	30	0.936384	0.120872	1.00303	0.0578719
tr|E9PT90|E9PT90_RAT	Spastic paraplegia 20 (Troyer syndrome) OS=Rattus norvegicus GN=Spart PE=1 SV=3	12.21	29.4	7	0.98768	0.905388	13.27	36.68	7	0.964796	0.718891	13.44	36.43	7	1.05666	0.629475	1.00304	0.0478182
tr|D3ZZA8|D3ZZA8_RAT	SEC24 homolog A, COPII coat complex component OS=Rattus norvegicus GN=Sec24a PE=1 SV=1	5.74	14.33	3	1.03814	0.770056	6.72	13.41	4	0.908443	0.812492	8.11	15.89	4	1.06283	0.52169	1.00314	0.0829317
sp|Q9JHZ9|S38A3_RAT	Sodium-coupled neutral amino acid transporter 3 OS=Rattus norvegicus GN=Slc38a3 PE=2 SV=1	4.02	14.48	2	1.22046	0.330883	4.82	12.1	3	0.826555	0.467401	6.01	12.3	4	0.963144	0.609229	1.00339	0.200012
tr|G3V7Q6|G3V7Q6_RAT	Proteasome subunit beta type OS=Rattus norvegicus GN=Psmb5 PE=1 SV=1	15.26	58.56	7	1.03114	0.571127	15.87	34.98	9	1.00795	0.946337	14.53	43.73	7	0.971236	0.73896	1.00344	0.0302062
tr|Q5XI34|Q5XI34_RAT	Protein phosphatase 2 (Formerly 2A), regulatory subunit A (PR 65), alpha isoform, isoform CRA_a OS=Rattus norvegicus GN=Ppp2r1a PE=1 SV=1	48.4	55.86	24	1.03535	0.425415	66.11	65.37	34	1.00356	0.928342	61.57	65.2	30	0.971454	0.43704	1.00346	0.031948
tr|F1LRV9|F1LRV9_RAT	Myosin heavy chain 1 OS=Rattus norvegicus GN=Myh1 PE=1 SV=2	142.4	61.04	74	1.32336	0.0135945	68.45	46.32	36	0.769924	0.801244	30.46	34.74	16	0.917202	0.710869	1.00349	0.286629
tr|D3ZTW9|D3ZTW9_RAT	Endonuclease G-like 1 (Predicted), isoform CRA_d OS=Rattus norvegicus GN=Exog PE=1 SV=1	8.63	34.51	5	1.01482	0.938259	11.32	45.11	6	0.983134	0.985607	9.75	58.97	5	1.01343	0.923672	1.00379	0.017906
sp|Q6MG60|DDAH2_RAT	N(G),N(G)-dimethylarginine dimethylaminohydrolase 2 OS=Rattus norvegicus GN=Ddah2 PE=1 SV=1	20.83	50.53	11	0.949758	0.585722	23.77	52.28	12	1.05041	0.42411	22.64	51.23	11	1.01132	0.911937	1.00383	0.0507437
sp|P0DP31|CALM3_RAT	Calmodulin-3 OS=Rattus norvegicus GN=Calm3 PE=1 SV=1	18.27	37.58	9	1.03334	0.935158	15.78	37.58	8	1.04245	0.790344	17.96	37.58	9	0.936108	0.555934	1.00396	0.0589423
sp|Q63560|MAP6_RAT	Microtubule-associated protein 6 OS=Rattus norvegicus GN=Map6 PE=1 SV=1	65.96	73.42	33	0.993559	0.941359	75.76	84.03	37	1.05598	0.19198	65.7	78.15	31	0.962758	0.669355	1.0041	0.0474974
tr|G3V6T1|G3V6T1_RAT	Coatomer subunit alpha OS=Rattus norvegicus GN=Copa PE=1 SV=1	33.53	37.09	17	0.991599	0.963522	47.03	46.24	25	0.921104	0.491464	37.66	42.32	18	1.09973	0.357004	1.00414	0.0899697
tr|D3ZHX3|D3ZHX3_RAT	DIRAS family GTPase 2 OS=Rattus norvegicus GN=Diras2 PE=4 SV=1	11.77	37.19	7	0.998926	0.989606	13.55	63.82	7	0.969729	0.830314	13.01	55.78	7	1.04381	0.762224	1.00415	0.0373145
tr|D4A5W8|D4A5W8_RAT	Phosphatidylglycerophosphate synthase 1 OS=Rattus norvegicus GN=Pgs1 PE=4 SV=2	4.47	22.35	3	1.02515	0.795328	6.18	20.78	3	1.06496	0.681429	7.44	26.08	4	0.92324	0.358008	1.00445	0.0730922
tr|A0A0G2K3Z9|A0A0G2K3Z9_RAT	Uncharacterized protein OS=Rattus norvegicus PE=4 SV=1	37.78	86.93	19	1.1413	0.0908467	39.27	78.89	22	0.929012	0.14379	40.75	84.92	20	0.944153	0.688421	1.00482	0.118435
tr|D3ZM21|D3ZM21_RAT	Catechol-O-methyltransferase domain containing 1 (Predicted), isoform CRA_a OS=Rattus norvegicus GN=Comtd1 PE=1 SV=1	6.01	25.19	3	1.0325	0.733526	6	24.05	3	1.16627	0.518344	5.52	24.81	3	0.815833	0.291203	1.00487	0.176844
tr|A0A0G2JT63|A0A0G2JT63_RAT	Cytoplasmic FMR1-interacting protein 2 OS=Rattus norvegicus GN=Cyfip2 PE=4 SV=1	30.45	31.85	15	0.92147	0.435106	35.42	38.26	16	1.07262	0.288208	36.46	40.85	17	1.02064	0.953028	1.00491	0.0767913
tr|Q6PCU4|Q6PCU4_RAT	Emd protein OS=Rattus norvegicus GN=Emd PE=1 SV=1	1.42	38.08	2	1.27013	0.264515	4.02	43.85	2	0.666021	0	5.8	30.77	3	1.07906	0.902344	1.00507	0.308778
tr|Q6P792|Q6P792_RAT	Four and a half LIM domains 1 OS=Rattus norvegicus GN=Fhl1 PE=1 SV=1	23.42	83.11	11	0.938034	0.53811	23.59	72.97	11	1.0079	0.909468	20.58	56.76	10	1.06931	0.25063	1.00508	0.065685
tr|D4ADF5|D4ADF5_RAT	Programmed cell death 5 OS=Rattus norvegicus GN=Pdcd5 PE=1 SV=1	8.49	55.2	4	0.918105	0.254598	8.35	54.4	5	1.02643	0.734645	6.07	53.6	3	1.07115	0.381956	1.00523	0.0786968
tr|Q5HZW9|Q5HZW9_RAT	Ecotropic viral integration site 2A OS=Rattus norvegicus GN=Evi2a PE=2 SV=1	4	26.13	2	0.917356	0	4	17.12	2	0.933367	0	4	18.02	2	1.16498	0.367026	1.00524	0.138578
tr|A0A0G2K757|A0A0G2K757_RAT	Dolichyl-diphosphooligosaccharide--protein glycosyltransferase subunit 2 OS=Rattus norvegicus GN=Rpn2 PE=1 SV=1	22.03	32.86	12	0.942339	0.762061	17.13	28.73	9	0.976745	0.820564	22.41	38.89	12	1.09724	0.438829	1.00544	0.0813424
tr|G3V7G8|G3V7G8_RAT	Glycine--tRNA ligase OS=Rattus norvegicus GN=Gars PE=1 SV=1	31.14	47.25	16	1.03038	0.642121	26.27	45.33	12	0.989909	0.858572	27.41	48.76	12	0.996265	0.966125	1.00552	0.0217667
tr|F1M779|F1M779_RAT	Clathrin heavy chain OS=Rattus norvegicus GN=Cltc PE=1 SV=1	140.94	49.13	76	1.03931	0.522768	158.57	56.36	86	1.00947	0.800296	158.67	57.55	86	0.967796	0.35245	1.00553	0.0359209
sp|Q63525|NUDC_RAT	Nuclear migration protein nudC OS=Rattus norvegicus GN=Nudc PE=1 SV=1	17	48.8	9	0.948653	0.730587	18.32	47.89	9	0.972523	0.606837	15.29	50.9	8	1.09573	0.489797	1.00564	0.0789329
tr|G3V8V3|G3V8V3_RAT	Alpha-1,4 glucan phosphorylase OS=Rattus norvegicus GN=Pygm PE=1 SV=1	99.45	68.53	47	1.07632	0.160022	101.4	67.46	47	0.981818	0.794897	94.63	63.66	45	0.958934	0.526149	1.00569	0.0622248
sp|P31399|ATP5H_RAT	ATP synthase subunit d, mitochondrial OS=Rattus norvegicus GN=Atp5h PE=1 SV=3	14.72	82.61	8	1.04555	0.50037	14.02	81.37	7	1.00101	0.996627	14.24	81.37	9	0.97074	0.757249	1.00577	0.0376305
tr|B5DFF4|B5DFF4_RAT	VPS37C, ESCRT-I subunit OS=Rattus norvegicus GN=Vps37c PE=1 SV=1	4.08	20.4	3	1.02292	0.914883	4.06	18.7	2	0.976117	0.811921	4.05	22.66	2	1.01861	0.849908	1.00588	0.025865
sp|P52631|STAT3_RAT	Signal transducer and activator of transcription 3 OS=Rattus norvegicus GN=Stat3 PE=1 SV=1	20.11	32.47	10	0.900112	0.252531	21.02	38.57	10	0.936266	0.312129	31.2	47.4	15	1.18127	0.366664	1.00588	0.15296
sp|P50398|GDIA_RAT	Rab GDP dissociation inhibitor alpha OS=Rattus norvegicus GN=Gdi1 PE=1 SV=1	71.86	76.29	37	1.04205	0.73359	73.28	72.93	36	0.995531	0.932861	78.26	73.38	41	0.9801	0.660544	1.00589	0.0322489
tr|F1LN75|F1LN75_RAT	Septin-9 OS=Rattus norvegicus GN=Sept9 PE=1 SV=3	22.24	42.4	12	0.998702	0	27.86	42.05	14	1.03859	0	32.42	56.01	17	0.980688	0.955968	1.00599	0.0296315
sp|P62775|MTPN_RAT	Myotrophin OS=Rattus norvegicus GN=Mtpn PE=1 SV=2	7.23	50.85	4	0.942954	0.662875	12	60.17	6	1.071	0.519193	14	65.25	7	1.00404	0.974983	1.006	0.0640457
tr|Q99MI5|Q99MI5_RAT	Spermidine synthase OS=Rattus norvegicus GN=LOC100912604 PE=1 SV=1	10.19	28.81	5	0.984171	0.927383	11.91	31.79	7	1.03507	0.839258	9.97	21.85	5	0.998846	0.994486	1.00603	0.0262006
sp|P62824|RAB3C_RAT	Ras-related protein Rab-3C OS=Rattus norvegicus GN=Rab3c PE=1 SV=1	20.6	53.3	10	1.15016	0.505182	17.92	53.74	9	0.952473	0.509798	16.58	54.63	8	0.915597	0.607258	1.00608	0.126138
sp|Q6P7R8|DHB12_RAT	Very-long-chain 3-oxoacyl-CoA reductase OS=Rattus norvegicus GN=Hsd17b12 PE=2 SV=1	17.4	48.08	8	1.0095	0.976491	17.09	50.32	9	1.01582	0.854142	15.01	38.46	8	0.993198	0.96586	1.00617	0.0116722
sp|Q5U2U2|CRKL_RAT	Crk-like protein OS=Rattus norvegicus GN=Crkl PE=1 SV=1	12.93	41.58	7	1.0206	0.82866	15.62	36.63	9	1.0211	0.818372	14.81	33.33	8	0.977408	0.862343	1.00637	0.0250826
tr|E9PT04|E9PT04_RAT	VPS39 HOPS complex subunit OS=Rattus norvegicus GN=Vps39 PE=1 SV=1	5.41	9.486	3	1.2339	0.368811	3.5	17.83	2	1.0515	0.702309	5.89	22.4	3	0.733833	0	1.00641	0.253066
tr|E9PT79|E9PT79_RAT	Translin OS=Rattus norvegicus GN=Tsn PE=1 SV=3	8.64	37.41	5	1.04908	0.875283	8.23	46.76	4	0.85986	0.674682	5	28.78	3	1.11036	0.703343	1.00643	0.130582
sp|P13221|AATC_RAT	Aspartate aminotransferase, cytoplasmic OS=Rattus norvegicus GN=Got1 PE=1 SV=3	46.16	71.43	24	1.02571	0.439154	48.43	70.22	26	1.05471	0.191986	47.87	68.77	26	0.938955	0.223719	1.00646	0.0602301
sp|P0C0A9|SVIP_RAT	Small VCP/p97-interacting protein OS=Rattus norvegicus GN=Svip PE=1 SV=1	5.42	39.47	3	1.05456	0.690941	4	31.58	2	0.977755	0.863455	6	39.47	3	0.987645	0.947606	1.00665	0.0417796
tr|F1LRV6|F1LRV6_RAT	GMP reductase OS=Rattus norvegicus GN=Gmpr PE=3 SV=1	8.35	42.03	4	0.954637	0.58004	12.08	45.51	6	0.972499	0.701127	12.83	40	6	1.09313	0.230069	1.00676	0.0753357
tr|A0A0G2K0P8|A0A0G2K0P8_RAT	CDW92 antigen, isoform CRA_b OS=Rattus norvegicus GN=Slc44a1 PE=1 SV=1	19.45	27.13	9	0.842367	0.286006	22.02	25.61	12	1.02922	0.624603	19.16	27.13	10	1.14875	0.0513402	1.00678	0.154418
tr|D4ABK1|D4ABK1_RAT	Synaptogyrin 3 OS=Rattus norvegicus GN=Syngr3 PE=1 SV=1	2.82	22.61	2	0.896115	0.876176	3.89	22.11	2	1.09866	0.471403	4.04	32.66	2	1.02559	0.849455	1.00679	0.102572
sp|P62944|AP2B1_RAT	AP-2 complex subunit beta OS=Rattus norvegicus GN=Ap2b1 PE=1 SV=1	67.41	45.68	34	1.06052	0.412654	68.23	51.12	33	0.983256	0.704338	66.06	47.17	32	0.977311	0.738834	1.00703	0.0464204
tr|F7EUU4|F7EUU4_RAT	COP9 signalosome subunit 5 OS=Rattus norvegicus GN=Cops5 PE=1 SV=1	6.79	23.39	4	1.13468	0.269473	14.7	40.87	7	0.812275	0.552368	16.08	43.19	8	1.07426	0.446019	1.00707	0.171381
tr|I6L9G6|I6L9G6_RAT	RCG31562, isoform CRA_c OS=Rattus norvegicus GN=Tardbp PE=1 SV=1	8.37	25.61	5	1.02836	0.749116	11.79	37.54	7	1.03127	0.656323	14.01	44.21	7	0.961731	0.546919	1.00712	0.039336
tr|Q6AYB2|Q6AYB2_RAT	RCG53912, isoform CRA_a OS=Rattus norvegicus GN=Sphk2 PE=1 SV=1	4.02	14.29	2	0.755544	0.223927	4	11.53	2	0.911058	0	7.72	23.05	4	1.35549	0.453458	1.00737	0.311354
sp|P31662|S6A17_RAT	Sodium-dependent neutral amino acid transporter SLC6A17 OS=Rattus norvegicus GN=Slc6a17 PE=1 SV=1	6	7.153	3	0.868358	0.653154	4.09	8.803	2	1.13047	0.6151	6.14	17.47	4	1.02337	0.91126	1.0074	0.131782
sp|P47971|NPTX1_RAT	Neuronal pentraxin-1 OS=Rattus norvegicus GN=Nptx1 PE=1 SV=1	5.51	34.26	3	1.03664	0.882926	6.28	34.95	3	1.09822	0.309753	7.11	34.03	4	0.887526	0.136329	1.00746	0.108336
tr|A0A0G2K4Y7|A0A0G2K4Y7_RAT	Unconventional myosin-Va OS=Rattus norvegicus GN=Myo5a PE=1 SV=1	69.5	45.3	35	1.01976	0.738393	65.35	41.03	34	1.06131	0.477078	76.49	50.77	42	0.941368	0.325321	1.00748	0.0609089
tr|B2RYQ2|B2RYQ2_RAT	Serine/threonine-protein phosphatase 2A activator OS=Rattus norvegicus GN=Ptpa PE=1 SV=1	14.12	48.61	8	0.977142	0.92637	11.83	43.96	6	1.03123	0.935266	16.2	54.49	8	1.0143	0.873559	1.00756	0.0276663
tr|A0A0G2KA71|A0A0G2KA71_RAT	Nectin cell adhesion molecule 2 OS=Rattus norvegicus GN=Nectin2 PE=1 SV=1	3.38	20.56	2	0.976348	0.79563	3.19	28.27	2	1.00598	0.961873	4.02	29.98	2	1.04035	0.760031	1.00756	0.0320285
tr|G3V9W0|G3V9W0_RAT	Centrin 2 OS=Rattus norvegicus GN=Cetn2 PE=1 SV=1	4.95	54.65	3	1.18204	0.20531	4.24	50	2	0.911806	0.632715	5.52	36.05	3	0.928908	0.711777	1.00759	0.151327
sp|Q99PD4|ARC1A_RAT	Actin-related protein 2/3 complex subunit 1A OS=Rattus norvegicus GN=Arpc1a PE=2 SV=1	13.19	57.84	6	1.05493	0.706995	13.21	42.7	6	1.02655	0.794128	16.97	55.14	8	0.941375	0.648535	1.00762	0.059097
sp|P20171|RASH_RAT	GTPase HRas OS=Rattus norvegicus GN=Hras PE=1 SV=2	15.83	60.85	8	1.0765	0.775231	15.98	66.14	9	1.06957	0.620712	19.13	63.49	11	0.87679	0.624264	1.00762	0.113355
sp|Q568Z9|PHYIP_RAT	Phytanoyl-CoA hydroxylase-interacting protein OS=Rattus norvegicus GN=Phyhip PE=2 SV=1	17.95	38.18	10	1.04235	0.470213	19.42	46.06	10	0.99916	0.988252	17.62	40.61	9	0.98155	0.768114	1.00769	0.0312823
sp|P62260|1433E_RAT	14-3-3 protein epsilon OS=Rattus norvegicus GN=Ywhae PE=1 SV=1	38.73	80.39	20	1.02716	0.579943	39.54	81.18	21	1.01776	0.858445	39.62	77.65	20	0.978208	0.844575	1.00771	0.0259755
sp|Q5FVI6|VATC1_RAT	V-type proton ATPase subunit C 1 OS=Rattus norvegicus GN=Atp6v1c1 PE=2 SV=1	26.69	51.57	12	1.07033	0.811041	26.7	54.19	12	1.04042	0.666373	28.42	54.97	13	0.912514	0.339045	1.00775	0.0838245
tr|D3ZE26|D3ZE26_RAT	Similar to RIKEN cDNA 1110063G11 (Predicted) OS=Rattus norvegicus GN=Tmcc2 PE=1 SV=1	7.59	34.56	4	0.853478	0.461536	3.32	31.73	2	1.16247	0.441052	4.15	24.36	2	1.00838	0.927639	1.00811	0.154497
tr|F1LRI7|F1LRI7_RAT	AP2-associated protein kinase 1 OS=Rattus norvegicus GN=Aak1 PE=1 SV=2	30.21	34.48	15	1.03265	0.66716	38.52	37.28	19	1.01014	0.929463	33.98	34.48	17	0.981904	0.81691	1.00823	0.0254282
sp|Q9WVK7|HCDH_RAT	Hydroxyacyl-coenzyme A dehydrogenase, mitochondrial OS=Rattus norvegicus GN=Hadh PE=2 SV=1	7.13	28.98	4	1.00751	0.936782	14.78	51.27	8	1.01111	0.930289	12.63	47.45	6	1.00635	0.974037	1.00832	0.00248027
tr|A0A0G2JSH9|A0A0G2JSH9_RAT	Peroxiredoxin-2 OS=Rattus norvegicus GN=Prdx2 PE=1 SV=1	14.95	55.05	8	1.04889	0.417167	16.69	55.05	10	1.01591	0.780684	16.68	51.01	9	0.960246	0.554396	1.00835	0.0448036
sp|P54319|PLAP_RAT	Phospholipase A-2-activating protein OS=Rattus norvegicus GN=Plaa PE=1 SV=3	35.29	35.72	18	0.961422	0.747147	34.54	44.78	17	1.05317	0.398823	39.96	52.58	19	1.01048	0.931891	1.00836	0.0459116
tr|B5DFI9|B5DFI9_RAT	Pdk3 protein OS=Rattus norvegicus GN=Pdk3 PE=2 SV=1	9.18	38.07	5	0.993111	0.935485	12.75	40	6	1.20019	0.347679	11.25	43.13	6	0.83185	0.590894	1.00838	0.184642
tr|B2GV15|B2GV15_RAT	Dihydrolipoamide acetyltransferase component of pyruvate dehydrogenase complex OS=Rattus norvegicus GN=Dbt PE=1 SV=1	14.37	32.37	7	1.06151	0.489821	17.77	40.46	8	0.975467	0.792838	14.44	39.83	7	0.988177	0.887033	1.00838	0.0464454
sp|P85108|TBB2A_RAT	Tubulin beta-2A chain OS=Rattus norvegicus GN=Tubb2a PE=1 SV=1	64.36	77.3	38	1.01122	0.928729	64.37	77.98	41	1.05986	0.669664	62.26	75.28	38	0.954559	0.720302	1.00855	0.0527002
tr|D4A9Q5|D4A9Q5_RAT	Carboxypeptidase M OS=Rattus norvegicus GN=Cpm PE=1 SV=1	14.33	32.28	8	1.18749	0.0208207	16.9	35.89	8	1.04941	0.570852	17.23	31.15	8	0.788971	0.046007	1.00862	0.202364
sp|Q07009|CAN2_RAT	Calpain-2 catalytic subunit OS=Rattus norvegicus GN=Capn2 PE=1 SV=3	37.62	46.57	18	1.03142	0.859736	45.23	42	23	0.943286	0.594957	47.82	50	24	1.05223	0.600161	1.00898	0.0578338
sp|P63095|GNAS2_RAT	Guanine nucleotide-binding protein G(s) subunit alpha isoforms short OS=Rattus norvegicus GN=Gnas PE=1 SV=1	22.15	48.98	11	0.979431	0.856055	18.45	45.43	10	1.02845	0.721337	24.11	47.97	12	1.01921	0.90536	1.00903	0.0260472
tr|A0A0G2JZ83|A0A0G2JZ83_RAT	ArfGAP with GTPase domain, ankyrin repeat and PH domain 3 OS=Rattus norvegicus GN=Agap3 PE=4 SV=1	21.6	28.96	10	0.910406	0.348933	17.26	20.3	9	1.14862	0.417078	15.07	30.32	9	0.968527	0.688817	1.00918	0.1242
sp|Q64232|TECR_RAT	Very-long-chain enoyl-CoA reductase OS=Rattus norvegicus GN=Tecr PE=1 SV=1	11.26	30.52	6	1.01857	0.919006	12.59	30.19	6	1.04953	0.733671	11.16	34.09	6	0.959463	0.642975	1.00919	0.0457607
sp|P34058|HS90B_RAT	Heat shock protein HSP 90-beta OS=Rattus norvegicus GN=Hsp90ab1 PE=1 SV=4	96.97	65.19	48	1.03802	0.724855	99.02	62.71	49	0.934536	0.27715	99.04	61.19	49	1.05548	0.461899	1.00934	0.0653709
sp|Q99P74|RB27B_RAT	Ras-related protein Rab-27B OS=Rattus norvegicus GN=Rab27b PE=2 SV=3	10.87	56.42	6	1.02122	0.836267	11.96	55.5	6	0.943456	0.654004	9.9	55.96	5	1.06341	0.697945	1.00936	0.0608492
sp|Q6AYK3|INO1_RAT	Inositol-3-phosphate synthase 1 OS=Rattus norvegicus GN=Isyna1 PE=3 SV=2	12.67	31.96	6	0.91984	0.693448	11.04	36.8	6	0.952487	0.529854	13.29	34.11	7	1.15587	0.139419	1.0094	0.127892
sp|Q08602|PGTA_RAT	Geranylgeranyl transferase type-2 subunit alpha OS=Rattus norvegicus GN=Rabggta PE=1 SV=1	20.9	40.21	11	1.03533	0.857174	24.05	51.15	13	1.05429	0.803228	20.61	52.56	12	0.938745	0.709815	1.00945	0.0619656
tr|B0BN65|B0BN65_RAT	Family with sequence similarity 49, member A OS=Rattus norvegicus GN=Fam49a PE=1 SV=1	10.12	33.13	5	0.981398	0.88233	11.65	30.96	6	0.98633	0.87834	13.27	32.2	7	1.06085	0.55258	1.00953	0.0445174
sp|G3V7W1|PDCD6_RAT	Programmed cell death protein 6 OS=Rattus norvegicus GN=Pdcd6 PE=2 SV=1	8.36	37.17	4	1.05484	0.508358	7.95	39.79	4	1.02655	0.886932	10.08	54.45	5	0.948288	0.693918	1.00989	0.055196
sp|Q498E2|TDRP_RAT	Testis development-related protein OS=Rattus norvegicus GN=Tdrp PE=1 SV=2	3.46	42.86	2	1.09574	0.816195	7.3	39.01	4	0.958696	0.922279	5.65	37.36	3	0.975812	0.948054	1.01008	0.0746739
sp|Q6IRK9|CBPQ_RAT	Carboxypeptidase Q OS=Rattus norvegicus GN=Cpq PE=1 SV=1	8.14	24.58	4	0.896407	0.575997	10.45	25.64	6	0.958317	0.551988	12.39	30.51	6	1.17594	0.112278	1.01022	0.146814
sp|P20717|PADI2_RAT	Protein-arginine deiminase type-2 OS=Rattus norvegicus GN=Padi2 PE=1 SV=1	35.22	35.19	18	1.14964	0.0579561	36.78	50.38	18	0.908351	0.153984	34.26	44.81	16	0.972833	0.777201	1.01027	0.124924
sp|A0JPM9|EIF3J_RAT	Eukaryotic translation initiation factor 3 subunit J OS=Rattus norvegicus GN=Eif3j PE=1 SV=1	7.57	46.33	4	0.952507	0.667217	7.63	44.79	3	1.07738	0.792688	8.99	58.69	5	1.00102	0.996667	1.0103	0.0629514
tr|A0A0G2JT93|A0A0G2JT93_RAT	Catenin (Cadherin associated protein), beta 1, isoform CRA_a OS=Rattus norvegicus GN=Ctnnb1 PE=1 SV=1	34.19	34.31	17	1.09938	0.505375	37.01	38.8	19	0.949983	0.776884	40.99	41.49	20	0.981642	0.894084	1.01033	0.0787225
tr|G3V874|G3V874_RAT	Erythrocyte membrane protein band 4.1-like 3 OS=Rattus norvegicus GN=Epb41l3 PE=1 SV=1	84.64	63.24	41	1.01147	0.912163	88.06	61.58	42	0.999685	0.997833	87.11	62.31	44	1.01986	0.952384	1.01034	0.0101366
tr|Q498U6|Q498U6_RAT	DNA fragmentation factor subunit alpha OS=Rattus norvegicus GN=Dffa PE=1 SV=1	6.18	18.11	4	0.949413	0.701146	3.92	33.58	3	1.05498	0.58281	9.11	43.4	5	1.02666	0.85279	1.01035	0.0546414
sp|Q5RK19|SNF8_RAT	Vacuolar-sorting protein SNF8 OS=Rattus norvegicus GN=Snf8 PE=1 SV=1	5.46	31.01	3	1.34878	0.497732	5.94	18.22	3	0.907971	0.481125	8.02	24.03	4	0.774552	0.805115	1.01043	0.300512
sp|P14942|GSTA4_RAT	Glutathione S-transferase alpha-4 OS=Rattus norvegicus GN=Gsta4 PE=1 SV=2	6.23	34.23	3	1.01389	0.942229	6.58	36.94	4	1.04633	0.548135	6.3	33.78	4	0.971224	0.714009	1.01048	0.0376698
tr|Q5BJT9|Q5BJT9_RAT	Creatine kinase U-type, mitochondrial OS=Rattus norvegicus GN=Ckmt1 PE=1 SV=1	39.58	70.81	20	1.03602	0.649324	48.88	69.38	23	1.03837	0.493993	44.57	69.62	22	0.957091	0.533953	1.01049	0.0462626
tr|G3V907|G3V907_RAT	Peroxisomal biogenesis factor 19-like OS=Rattus norvegicus GN=LOC100911356 PE=1 SV=1	10.39	44.82	5	1.05504	0.715717	8.87	33.11	5	0.91039	0.487481	12.02	38.46	6	1.0661	0.668675	1.01051	0.0868823
sp|D3ZTX0|TMED7_RAT	Transmembrane emp24 domain-containing protein 7 OS=Rattus norvegicus GN=Tmed7 PE=1 SV=1	6	31.86	3	1.15837	0.211046	5.51	39.38	3	0.979475	0.821858	6.04	27.88	3	0.894102	0.902812	1.01065	0.134861
tr|Q5XIJ3|Q5XIJ3_RAT	Isocitrate dehydrogenase [NAD] subunit, mitochondrial OS=Rattus norvegicus GN=Idh3g PE=1 SV=1	23.24	52.16	11	0.978382	0.854831	23.34	53.44	11	1.02539	0.831581	26.25	55.22	14	1.02841	0.865566	1.01073	0.0280523
tr|A0A0H2UHL9|A0A0H2UHL9_RAT	Drebrin OS=Rattus norvegicus GN=Dbn1 PE=1 SV=1	27.41	30.88	14	0.989792	0.957185	22.47	33.29	12	0.989845	0.883017	23.77	38.95	12	1.05269	0.60007	1.01078	0.0363001
tr|A0A0G2JTH6|A0A0G2JTH6_RAT	EH domain-containing protein 3 OS=Rattus norvegicus GN=Ehd3 PE=1 SV=1	27.09	39.16	13	1.05746	0.773942	30.08	35.84	15	1.04131	0.652708	33	43.71	15	0.933834	0.518679	1.01087	0.0671983
sp|Q04462|SYVC_RAT	Valine--tRNA ligase OS=Rattus norvegicus GN=Vars PE=2 SV=2	41.31	45.09	21	0.952357	0.711567	35.04	41.85	19	0.979216	0.933503	42.28	41.77	21	1.10146	0.15803	1.01101	0.0794722
sp|P62142|PP1B_RAT	Serine/threonine-protein phosphatase PP1-beta catalytic subunit OS=Rattus norvegicus GN=Ppp1cb PE=1 SV=3	21.12	52.29	10	1.03939	0.836656	21.98	54.43	11	1.01079	0.91438	22.75	48.32	11	0.983728	0.843748	1.0113	0.027834
tr|A0A1W2Q6E9|A0A1W2Q6E9_RAT	Moesin OS=Rattus norvegicus GN=Msn PE=1 SV=1	48.27	61.63	21	0.985247	0.768501	56.93	70.14	27	0.995333	0.886853	49.43	61.98	24	1.05359	0.609172	1.01139	0.0368902
sp|P62630|EF1A1_RAT	Elongation factor 1-alpha 1 OS=Rattus norvegicus GN=Eef1a1 PE=2 SV=1	39.82	48.27	20	1.03014	0.684592	41.56	49.57	21	0.940056	0.386024	46.6	47.84	24	1.06402	0.555449	1.0114	0.0640703
tr|A0A0A0MXW1|A0A0A0MXW1_RAT	2-oxoisovalerate dehydrogenase subunit beta, mitochondrial OS=Rattus norvegicus GN=Bckdhb PE=1 SV=1	4.77	18.16	3	0.961399	0.687042	5.66	26.34	3	1.1001	0.404208	3.26	16.37	2	0.972767	0.768991	1.01142	0.0770085
sp|Q9WV63|KIF2A_RAT	Kinesin-like protein KIF2A OS=Rattus norvegicus GN=Kif2a PE=1 SV=2	21.54	41.7	10	0.779535	0.257332	27	41.99	14	1.16379	0	28.88	38.01	14	1.09095	0	1.01142	0.204098
tr|F1LT49|F1LT49_RAT	Leucine-rich repeat-containing 47 OS=Rattus norvegicus GN=Lrrc47 PE=1 SV=2	24.38	46.9	12	0.978539	0.861008	23.83	49.14	11	1.07675	0.47639	21.77	47.76	11	0.979416	0.732039	1.01157	0.0564499
tr|D4A8F2|D4A8F2_RAT	Ras suppressor protein 1 OS=Rattus norvegicus GN=Rsu1 PE=1 SV=3	11.36	34.3	6	0.912613	0.491412	7.7	32.13	4	0.970596	0.753918	11.18	27.8	6	1.1518	0.181494	1.01167	0.124771
sp|P60522|GBRL2_RAT	Gamma-aminobutyric acid receptor-associated protein-like 2 OS=Rattus norvegicus GN=Gabarapl2 PE=3 SV=1	3.65	58.97	2	1.00806	0.974114	4.93	59.83	4	1.0489	0.65398	4.88	47.01	4	0.978308	0.893072	1.01176	0.0354428
sp|P15791|KCC2D_RAT	Calcium/calmodulin-dependent protein kinase type II subunit delta OS=Rattus norvegicus GN=Camk2d PE=1 SV=1	23.03	38.09	11	1.0989	0.307607	21.43	51.22	11	1.01242	0.948127	20.22	37.71	11	0.924053	0.472333	1.01179	0.0874259
tr|D3ZVQ0|D3ZVQ0_RAT	Ubiquitinyl hydrolase 1 OS=Rattus norvegicus GN=Usp5 PE=1 SV=1	42.82	36.25	23	1.01592	0.741657	55.67	44.41	26	1.00145	0.988458	56.92	48.72	27	1.01837	0.80427	1.01191	0.00914563
tr|G3V7J0|G3V7J0_RAT	Aldehyde dehydrogenase family 6, subfamily A1, isoform CRA_b OS=Rattus norvegicus GN=Aldh6a1 PE=1 SV=1	44.83	66.54	23	1.01699	0.676641	49.69	64.86	26	1.04954	0.638222	47.55	62.99	24	0.96922	0.751768	1.01192	0.0404009
sp|P47860|PFKAP_RAT	ATP-dependent 6-phosphofructokinase, platelet type OS=Rattus norvegicus GN=Pfkp PE=1 SV=2	67.36	49.24	32	1.07467	0.139086	61.37	47.46	32	0.974332	0.57869	60.76	49.49	31	0.98676	0.920067	1.01192	0.0546974
sp|P16975|SPRC_RAT	SPARC OS=Rattus norvegicus GN=Sparc PE=1 SV=4	8.37	34.88	4	1.03209	0.647666	6.95	26.91	4	1.04619	0.896319	7.22	26.91	5	0.957544	0.850492	1.01194	0.0476337
tr|Q3B7V5|Q3B7V5_RAT	RAB2B, member RAS oncogene family OS=Rattus norvegicus GN=Rab2b PE=1 SV=1	16.01	60.47	8	0.99995	0.999689	18.15	60.47	9	1.10911	0.348904	18.02	52.09	10	0.92688	0.679656	1.01198	0.0917092
tr|Q9WVJ6|Q9WVJ6_RAT	Tissue-type transglutaminase OS=Rattus norvegicus GN=Tgm2 PE=1 SV=1	19.24	33.82	10	1.1621	0.0296217	14.72	24.78	8	0.92457	0.256761	24.61	33.24	12	0.949346	0.745415	1.01201	0.130577
sp|Q5XIN6|LETM1_RAT	Mitochondrial proton/calcium exchanger protein OS=Rattus norvegicus GN=Letm1 PE=1 SV=1	23.06	48.44	12	1.09056	0.767856	24.68	45.87	12	1.07471	0.269408	20.2	42.76	10	0.870942	0.0648229	1.01207	0.12248
tr|A0A0G2JSS8|A0A0G2JSS8_RAT	Peroxiredoxin 5, isoform CRA_c OS=Rattus norvegicus GN=Prdx5 PE=1 SV=1	20.53	63.85	10	0.987961	0.802558	19.59	83.1	10	1.06329	0.264675	22	65.26	13	0.984991	0.767852	1.01208	0.0443738
tr|G3V7V6|G3V7V6_RAT	All-trans-13,14-dihydroretinol saturase, isoform CRA_b OS=Rattus norvegicus GN=Retsat PE=1 SV=1	11.21	25.45	6	0.774925	0.0183231	8.77	20.03	5	1.15957	0.338115	6.99	28.08	3	1.10206	0.347646	1.01219	0.207477
sp|Q5XIM9|TCPB_RAT	T-complex protein 1 subunit beta OS=Rattus norvegicus GN=Cct2 PE=1 SV=3	42.23	67.66	21	0.979289	0.893217	44.01	67.48	22	1.0056	0.935614	40.97	57.01	20	1.05171	0.609522	1.0122	0.0366587
sp|Q66HA6|ARL8B_RAT	ADP-ribosylation factor-like protein 8B OS=Rattus norvegicus GN=Arl8b PE=2 SV=1	7.03	52.69	5	1.04439	0.868467	7.07	33.87	4	1.17609	0	5.23	23.66	3	0.816494	0	1.01232	0.181929
sp|P63029|TCTP_RAT	Translationally-controlled tumor protein OS=Rattus norvegicus GN=Tpt1 PE=1 SV=1	13.24	50.58	7	1.16225	0.666394	11.89	54.07	6	0.940524	0.508667	10.09	43.02	5	0.934255	0.602752	1.01234	0.129862
tr|D4A7U1|D4A7U1_RAT	Zyxin OS=Rattus norvegicus GN=Zyx PE=1 SV=1	8.57	19.33	4	1.09952	0.489904	10.75	26.06	6	0.906455	0.141538	11.6	21.45	6	1.0311	0.644493	1.01236	0.0978871
tr|F1LPS8|F1LPS8_RAT	Transcriptional activator protein Pur-alpha OS=Rattus norvegicus GN=Pura PE=1 SV=3	20.05	68.51	10	0.98262	0.881227	21.65	66.09	11	1.12207	0.251739	22.38	66.09	12	0.932468	0.669245	1.01239	0.098244
sp|Q99MZ4|GGT7_RAT	Glutathione hydrolase 7 OS=Rattus norvegicus GN=Ggt7 PE=1 SV=2	4.18	15.86	2	1.0954	0.589795	4.86	16.31	3	0.995063	0.953605	5.4	12.39	3	0.946785	0.637064	1.01242	0.0758146
sp|Q3KRE8|TBB2B_RAT	Tubulin beta-2B chain OS=Rattus norvegicus GN=Tubb2b PE=1 SV=1	64.36	77.3	38	1.11241	0.476161	64.37	77.98	40	0.999874	0.999192	62.26	75.28	38	0.925226	0.62763	1.0125	0.0942282
sp|P30835|PFKAL_RAT	ATP-dependent 6-phosphofructokinase, liver type OS=Rattus norvegicus GN=Pfkl PE=1 SV=3	26.75	34.36	13	1.07089	0.398607	31.85	45.9	17	0.98114	0.855053	35.91	38.08	18	0.985762	0.874417	1.0126	0.0505381
tr|F7FG31|F7FG31_RAT	C-terminal-binding protein 1 OS=Rattus norvegicus GN=Ctbp1 PE=1 SV=1	13.71	38.46	6	1.00033	0.996253	10.95	32.26	6	1.03243	0.644462	8.9	25.56	5	1.00506	0.960261	1.01261	0.0173264
sp|P97546|NPTN_RAT	Neuroplastin OS=Rattus norvegicus GN=Nptn PE=1 SV=2	14.69	37.66	8	1.05394	0.507637	18.73	37.4	10	1.05995	0.396844	13.79	36.39	8	0.924084	0.506696	1.01266	0.0767669
tr|D4A6X3|D4A6X3_RAT	KN motif and ankyrin repeat domains 4 OS=Rattus norvegicus GN=Kank4 PE=1 SV=1	4.29	19.11	2	1.12283	0.895247	11.16	28.71	6	1.09895	0.656094	8.15	26.53	4	0.816324	0.100816	1.0127	0.170487
tr|E9PTV0|E9PTV0_RAT	Guanylate kinase 1 OS=Rattus norvegicus GN=Guk1 PE=1 SV=2	10.31	47.95	6	1.06647	0.787754	11.8	42.92	7	1.01433	0.912824	5.03	42.47	3	0.95806	0.596362	1.01295	0.0542167
tr|C0JPT7|C0JPT7_RAT	Filamin A OS=Rattus norvegicus GN=Flna PE=1 SV=1	73.44	36	38	0.903718	0.226782	60.49	33.08	35	0.969955	0.547028	78.19	40.89	42	1.16536	0.0319643	1.01301	0.136029
sp|O55166|VPS52_RAT	Vacuolar protein sorting-associated protein 52 homolog OS=Rattus norvegicus GN=Vps52 PE=2 SV=2	14.79	25.59	9	1.0853	0.334376	8.85	28.91	4	1.03395	0.8265	8.57	25.59	4	0.920299	0.603823	1.01319	0.0844402
sp|P62332|ARF6_RAT	ADP-ribosylation factor 6 OS=Rattus norvegicus GN=Arf6 PE=1 SV=2	7.03	36.57	4	1.00848	0.931539	9.75	47.43	6	0.980915	0.961421	8.15	54.29	4	1.05027	0.706779	1.01322	0.0349181
tr|D3Z8I7|D3Z8I7_RAT	Glutathione S-transferase, theta 3 OS=Rattus norvegicus GN=Gstt3 PE=1 SV=1	6.26	42.38	3	0.989176	0.963562	10.66	46.19	6	1.13643	0.186671	11.62	40	6	0.914277	0.62008	1.0133	0.113025
sp|P41499|PTN11_RAT	Tyrosine-protein phosphatase non-receptor type 11 OS=Rattus norvegicus GN=Ptpn11 PE=1 SV=4	26.62	54.77	13	1.02938	0.760065	31.2	55.61	16	0.977539	0.878021	26.26	55.95	12	1.0337	0.632694	1.01354	0.0312518
tr|A0A1W2Q6F8|A0A1W2Q6F8_RAT	NADH dehydrogenase [ubiquinone] 1 alpha subcomplex subunit 10, mitochondrial OS=Rattus norvegicus GN=Ndufa10l1 PE=3 SV=1	25.62	55.77	12	1.00481	0.940045	27.35	63.66	13	1.06668	0.570849	33.81	72.39	17	0.970277	0.807985	1.01393	0.0488449
sp|Q07205|IF5_RAT	Eukaryotic translation initiation factor 5 OS=Rattus norvegicus GN=Eif5 PE=1 SV=1	17.2	45.92	9	1.01591	0.818001	18.87	47.09	10	1.02613	0.861162	18.37	50.12	9	0.999912	0.998959	1.01398	0.0132158
sp|Q4FZY0|EFHD2_RAT	EF-hand domain-containing protein D2 OS=Rattus norvegicus GN=Efhd2 PE=1 SV=1	26.14	69.46	14	1.05342	0.668121	30	61.51	16	1.04072	0.776392	29.98	64.44	15	0.948011	0.780537	1.01405	0.0575433
sp|D4A1R8|CPNE1_RAT	Copine-1 OS=Rattus norvegicus GN=Cpne1 PE=1 SV=1	14.21	27.05	8	1.19931	0.200974	14.62	24.25	8	0.968744	0.929817	9.67	22.95	5	0.874144	0.598627	1.01407	0.167253
sp|P70580|PGRC1_RAT	Membrane-associated progesterone receptor component 1 OS=Rattus norvegicus GN=Pgrmc1 PE=1 SV=3	8.48	52.31	4	0.957535	0.811984	9.73	52.31	6	0.967356	0.688375	9.28	45.64	5	1.1174	0.3483	1.0141	0.0895948
sp|Q5XI73|GDIR1_RAT	Rho GDP-dissociation inhibitor 1 OS=Rattus norvegicus GN=Arhgdia PE=1 SV=1	15.57	67.16	9	1.01505	0.822481	20.2	62.25	11	0.997692	0.978113	19.73	65.2	10	1.02999	0.784757	1.01424	0.0161632
tr|D3ZD73|D3ZD73_RAT	DEAD-box helicase 6 OS=Rattus norvegicus GN=Ddx6 PE=1 SV=1	16.79	45.96	9	0.817047	0.416152	15.13	37.89	8	1.05032	0.781331	12.33	31.06	7	1.17545	0.104651	1.01427	0.181899
tr|F1LX07|F1LX07_RAT	Solute carrier family 25 member 12 OS=Rattus norvegicus GN=Slc25a12 PE=1 SV=3	48.19	50.53	27	1.01531	0.69212	44.13	49.77	23	1.10054	0.497613	45.68	44.58	24	0.92717	0.213774	1.01434	0.0866897
tr|Q66H09|Q66H09_RAT	Tetratricopeptide repeat domain 1 OS=Rattus norvegicus GN=Ttc1 PE=1 SV=1	8.41	32.53	4	1.09113	0.68998	8.45	37.67	5	0.890363	0.729791	6.01	43.15	3	1.06171	0.675733	1.0144	0.108423
sp|P08461|ODP2_RAT	Dihydrolipoyllysine-residue acetyltransferase component of pyruvate dehydrogenase complex, mitochondrial OS=Rattus norvegicus GN=Dlat PE=1 SV=3	33.79	43.99	16	1.01648	0.845794	37.56	44.3	19	1.04954	0.228219	36.78	46.36	19	0.977492	0.571259	1.0145	0.0360637
sp|O35814|STIP1_RAT	Stress-induced-phosphoprotein 1 OS=Rattus norvegicus GN=Stip1 PE=1 SV=1	53.16	71.64	28	1.10445	0.2194	55.37	69.8	27	0.971999	0.685114	55.26	71.27	27	0.967245	0.627108	1.01456	0.0778782
sp|P07943|ALDR_RAT	Aldose reductase OS=Rattus norvegicus GN=Akr1b1 PE=1 SV=3	29.75	66.14	16	0.957259	0.456095	29.51	61.39	15	0.944169	0.264374	27.91	60.13	15	1.14235	0.00501525	1.01459	0.110832
tr|Q5U329|Q5U329_RAT	Anion exchange protein OS=Rattus norvegicus GN=Slc4a1 PE=1 SV=1	19.66	23.65	10	1.15384	0.144741	19.3	28	11	0.820042	0.0190484	15.01	22.35	8	1.07057	0.365966	1.01482	0.173741
sp|P19804|NDKB_RAT	Nucleoside diphosphate kinase B OS=Rattus norvegicus GN=Nme2 PE=1 SV=1	20.36	86.18	11	1.06539	0.4401	23.57	84.21	11	0.971626	0.710713	20.75	84.21	11	1.00767	0.933814	1.0149	0.0472991
sp|P10824|GNAI1_RAT	Guanine nucleotide-binding protein G(i) subunit alpha-1 OS=Rattus norvegicus GN=Gnai1 PE=1 SV=3	30.79	50	16	1.11891	0.126282	26.14	47.46	13	0.961993	0.635805	25.17	51.13	12	0.964416	0.661123	1.01511	0.0899069
sp|P18088|DCE1_RAT	Glutamate decarboxylase 1 OS=Rattus norvegicus GN=Gad1 PE=2 SV=1	8.02	17.03	4	0.973943	0.903398	14.87	23.95	7	1.16064	0.192579	9.01	22.93	5	0.910954	0.620677	1.01518	0.129852
sp|P43138|APEX1_RAT	DNA-(apurinic or apyrimidinic site) lyase OS=Rattus norvegicus GN=Apex1 PE=1 SV=2	5.14	35.02	3	1.1049	0.669209	9.72	29.65	5	0.896688	0.717788	9.72	44.48	6	1.04409	0.610191	1.01523	0.107064
tr|F1M953|F1M953_RAT	Stress-70 protein, mitochondrial OS=Rattus norvegicus GN=Hspa9 PE=1 SV=1	55.67	68.34	27	0.986439	0.923069	61.36	66.57	31	1.04698	0.426864	55.49	59.79	28	1.01285	0.75462	1.01542	0.0303499
sp|Q66H12|NAGAB_RAT	Alpha-N-acetylgalactosaminidase OS=Rattus norvegicus GN=Naga PE=2 SV=1	5.03	19.04	3	0.975247	0.794157	9.2	36.39	5	1.07946	0.403374	6.67	31.08	3	0.992092	0.951678	1.0156	0.0559395
sp|Q5RJL0|ERMIN_RAT	Ermin OS=Rattus norvegicus GN=Ermn PE=1 SV=1	24.82	57.45	12	1.23159	0.0218541	23.29	58.87	12	0.881243	0.116016	26.34	55.67	13	0.934068	0.472806	1.01563	0.188881
sp|Q5PQN0|NCALD_RAT	Neurocalcin-delta OS=Rattus norvegicus GN=Ncald PE=1 SV=3	16.94	57.51	8	1.04183	0.663813	15.15	62.18	8	1.05232	0.755302	16.12	60.1	8	0.95318	0.85883	1.01578	0.054465
sp|P68511|1433F_RAT	14-3-3 protein eta OS=Rattus norvegicus GN=Ywhah PE=1 SV=2	34.82	76.42	18	1.03966	0.661701	35.95	77.24	18	1.03742	0.516505	36.08	69.92	19	0.970272	0.62042	1.01578	0.0394286
sp|P11505|AT2B1_RAT	Plasma membrane calcium-transporting ATPase 1 OS=Rattus norvegicus GN=Atp2b1 PE=1 SV=2	58.27	36.41	28	0.97451	0.897457	60.29	37.12	32	1.03518	0.542116	55.08	43.24	28	1.03767	0.597919	1.01579	0.035771
tr|A0A0G2K4B0|A0A0G2K4B0_RAT	G protein-coupled receptor, class C, group 5, member B OS=Rattus norvegicus GN=Gprc5b PE=1 SV=1	6	19.9	3	0.831742	0.718368	10	18.91	5	1.08417	0.294168	9.14	19.4	5	1.1316	0.240104	1.01584	0.161186
tr|D4A3E1|D4A3E1_RAT	Heterogeneous nuclear ribonucleoprotein L-like OS=Rattus norvegicus GN=Hnrnpll PE=1 SV=1	9.76	21.66	5	1.02296	0.926087	7.98	21.15	5	1.05749	0.875334	10.49	24.7	6	0.967519	0.899403	1.01599	0.0453883
tr|M0R3N4|M0R3N4_RAT	Vesicle amine transport 1-like OS=Rattus norvegicus GN=Vat1l PE=1 SV=2	27.13	46.03	14	0.938666	0.584869	27.55	54.23	13	1.06708	0.298481	22.21	43.92	11	1.04335	0.651244	1.01637	0.068328
tr|F1LRL9|F1LRL9_RAT	Microtubule-associated protein 1B OS=Rattus norvegicus GN=Map1b PE=1 SV=1	155.57	53.6	86	1.14427	0.0106493	168.56	51.4	91	0.947566	0.407627	162.95	52.95	89	0.957453	0.395223	1.01643	0.11082
tr|F2Z3Q8|F2Z3Q8_RAT	Importin subunit beta-1 OS=Rattus norvegicus GN=Kpnb1 PE=1 SV=1	33.74	35.27	18	0.991353	0.875583	34.83	29.79	20	0.946627	0.70675	35.26	27.85	18	1.11138	0.54412	1.01645	0.0851977
tr|Q6P9Y4|Q6P9Y4_RAT	ADP/ATP translocase 1 OS=Rattus norvegicus GN=Slc25a4 PE=1 SV=1	34.94	60.74	18	1.0761	0.257196	43.76	53.69	22	1.00965	0.89087	40.62	57.38	21	0.965407	0.674586	1.01705	0.0557154
tr|F1LPT0|F1LPT0_RAT	Gap junction protein OS=Rattus norvegicus GN=Gjc3 PE=1 SV=1	8.68	32.17	5	1.108	0.208825	7.32	36.82	4	1.06676	0.575629	4.43	24.03	2	0.876662	0.678207	1.01714	0.123392
sp|Q8VI04|ASGL1_RAT	Isoaspartyl peptidase/L-asparaginase OS=Rattus norvegicus GN=Asrgl1 PE=1 SV=1	26.74	69.37	14	0.99118	0.847129	25.64	58.56	13	1.0849	0.109331	26.95	67.57	13	0.975556	0.861506	1.01721	0.0591402
sp|P51635|AK1A1_RAT	Alcohol dehydrogenase [NADP(+)] OS=Rattus norvegicus GN=Akr1a1 PE=1 SV=2	31.52	70.77	15	0.960728	0.842907	32.6	77.54	16	1.02992	0.526842	38.15	78.15	20	1.06162	0.564612	1.01743	0.0515954
sp|P62828|RAN_RAT	GTP-binding nuclear protein Ran OS=Rattus norvegicus GN=Ran PE=1 SV=3	21.48	48.15	11	1.07525	0.500017	19.74	50	12	1.01317	0.871243	21.48	50.46	11	0.964194	0.673846	1.01754	0.0556542
tr|Q5U2X8|Q5U2X8_RAT	Acyl-CoA thioesterase 9 OS=Rattus norvegicus GN=Acot9 PE=1 SV=1	18.69	46.7	9	1.03805	0.518247	21.9	48.06	10	1.02016	0.909279	25.86	51.48	13	0.994425	0.975346	1.01755	0.0219313
sp|P32551|QCR2_RAT	Cytochrome b-c1 complex subunit 2, mitochondrial OS=Rattus norvegicus GN=Uqcrc2 PE=1 SV=2	38.22	58.41	20	1.05557	0.270059	36.21	48.67	21	1.05011	0.316604	38.59	57.3	22	0.947118	0.801449	1.0176	0.0610979
sp|P63012|RAB3A_RAT	Ras-related protein Rab-3A OS=Rattus norvegicus GN=Rab3a PE=1 SV=1	27.23	65.91	13	1.09332	0.301386	29.83	72.73	15	0.969831	0.648076	27.74	65.91	15	0.989961	0.864024	1.0177	0.0662532
tr|A0A0G2K9L2|A0A0G2K9L2_RAT	Target of myb1-like 2 membrane-trafficking protein OS=Rattus norvegicus GN=Tom1l2 PE=1 SV=1	17.73	27.65	11	0.896298	0.253818	20.72	26.7	11	1.0823	0.113168	19.21	26.14	11	1.07516	0.735058	1.01792	0.105387
sp|Q9QVC8|FKBP4_RAT	Peptidyl-prolyl cis-trans isomerase FKBP4 OS=Rattus norvegicus GN=Fkbp4 PE=1 SV=3	24.55	44.32	13	1.16568	0.0551849	19.49	53.71	11	0.917799	0.450218	26.84	53.49	13	0.970303	0.750058	1.01793	0.13062
tr|D3ZQP6|D3ZQP6_RAT	Sema domain, immunoglobulin domain (Ig), and GPI membrane anchor, (Semaphorin) 7A (Predicted) OS=Rattus norvegicus GN=Sema7a PE=1 SV=1	4.75	19.82	3	1.16581	0.755405	7.93	25.08	4	0.883687	0.583612	7.32	29.28	3	1.00443	0.987933	1.01798	0.141551
tr|F1M7H7|F1M7H7_RAT	Membrane-associated guanylate kinase, WW and PDZ domain-containing protein 1 OS=Rattus norvegicus GN=Magi1 PE=1 SV=3	11.2	18.4	6	0.920679	0.553124	8.95	16.02	5	1.16599	0.282247	12.71	22.55	7	0.967278	0.90972	1.01798	0.130279
tr|D3ZAS2|D3ZAS2_RAT	Small G protein-signaling modulator 1 OS=Rattus norvegicus GN=Sgsm1 PE=1 SV=2	6.21	18.76	3	1.28962	0.250262	3.7	13.17	3	0.836236	0.583218	3.76	12.53	3	0.928445	0.805298	1.0181	0.23962
tr|Q66HH8|Q66HH8_RAT	Annexin OS=Rattus norvegicus GN=Anxa5 PE=1 SV=1	43.58	63.01	21	0.996355	0.97296	41.9	60.82	20	0.991152	0.945406	41.4	62.07	20	1.06687	0.514987	1.01813	0.0422945
tr|B2RZD6|B2RZD6_RAT	NDUFA4, mitochondrial complex-associated OS=Rattus norvegicus GN=Ndufa4 PE=1 SV=1	10.59	47.56	6	1.00743	0.927944	10.37	56.1	5	1.13798	0.490181	9.78	50	6	0.909332	0.398702	1.01825	0.114707
sp|D4A7N1|MIC25_RAT	MICOS complex subunit Mic25 OS=Rattus norvegicus GN=Chchd6 PE=1 SV=1	17.76	62.45	9	0.923472	0.825012	19.1	54.02	10	1.19172	0.114591	15.73	59.39	9	0.939744	0.754756	1.01831	0.150394
tr|F1LQZ0|F1LQZ0_RAT	Transmembrane protein 65 OS=Rattus norvegicus GN=Tmem65 PE=4 SV=1	7.35	25.87	4	1.05487	0.794113	6.58	32.05	3	1.06551	0.756867	8.67	27.41	5	0.934755	0.474299	1.01838	0.0726151
sp|Q920A6|RISC_RAT	Retinoid-inducible serine carboxypeptidase OS=Rattus norvegicus GN=Scpep1 PE=2 SV=1	9.77	23.89	6	0.93894	0.493638	8.26	29.87	4	0.908598	0.665501	11.69	27.88	7	1.20797	0.280162	1.0185	0.164781
tr|G3V6P7|G3V6P7_RAT	Myosin, heavy polypeptide 9, non-muscle OS=Rattus norvegicus GN=Myh9 PE=1 SV=1	118.01	58.21	61	1.06344	0.368508	115.75	58.47	62	0.893278	0.216149	127.78	56.63	66	1.10041	0.158835	1.01904	0.110471
tr|D3ZT16|D3ZT16_RAT	MAP6 domain-containing 1 OS=Rattus norvegicus GN=Map6d1 PE=1 SV=1	10.53	86.39	5	1.23002	0.0174209	10.56	80.1	5	0.910296	0.175252	10.57	83.77	5	0.916907	0.363443	1.01907	0.182712
sp|P08644|RASK_RAT	GTPase KRas OS=Rattus norvegicus GN=Kras PE=1 SV=3	9.77	49.21	5	0.873424	0	14.33	64.55	7	1.1661	0.593642	17.15	64.55	9	1.01794	0.93894	1.01915	0.14634
tr|M0RCH6|M0RCH6_RAT	Uncharacterized protein OS=Rattus norvegicus PE=1 SV=2	10.89	40.09	6	1.06704	0.385621	11.29	36.49	6	0.954838	0.774223	11.02	38.74	6	1.03565	0	1.01918	0.057888
sp|A8WCF8|TPRGL_RAT	Tumor protein p63-regulated gene 1-like protein OS=Rattus norvegicus GN=Tprg1l PE=1 SV=1	7.11	43.23	4	0.97791	0.869794	9.03	39.85	5	1.02584	0.820119	11.81	39.85	6	1.05429	0.550656	1.01935	0.0386014
sp|P62193|PRS4_RAT	26S proteasome regulatory subunit 4 OS=Rattus norvegicus GN=Psmc1 PE=2 SV=1	11.05	40	5	0.999471	0.996089	19.66	47.95	11	1.03892	0.72106	21.3	48.41	11	1.01972	0.880232	1.01937	0.0197277
sp|O54861|SORT_RAT	Sortilin OS=Rattus norvegicus GN=Sort1 PE=1 SV=3	8.2	18.91	4	1.09153	0.703298	7.86	21.09	4	0.970853	0.940496	10.78	27.15	7	0.995955	0.98176	1.01945	0.0636757
tr|B0K030|B0K030_RAT	DnaJ (Hsp40) homolog, subfamily B, member 1 (Predicted), isoform CRA_b OS=Rattus norvegicus GN=Dnajb1 PE=1 SV=1	10.71	33.82	5	0.74758	0.463982	10.27	27.94	6	1.30661	0.22541	5.59	31.47	3	1.00421	0.990113	1.01947	0.279827
tr|D3ZJ32|D3ZJ32_RAT	Extended synaptotagmin 2 OS=Rattus norvegicus GN=Esyt2 PE=1 SV=3	9.41	22.84	5	1.03569	0.815751	14.58	31.12	7	1.00489	0.983149	14.71	27.69	8	1.01785	0.916095	1.01948	0.0154641
tr|F1LQJ7|F1LQJ7_RAT	Phosphoenolpyruvate carboxykinase 2 (mitochondrial) OS=Rattus norvegicus GN=Pck2 PE=1 SV=2	18	35.26	9	0.914845	0.418991	18.55	40.87	9	1.07265	0.601581	21.19	33.7	11	1.07117	0.257193	1.01955	0.0906845
tr|D3ZWA8|D3ZWA8_RAT	Adaptor protein, phosphotyrosine-interacting with PH domain and leucine zipper 1 OS=Rattus norvegicus GN=Appl1 PE=1 SV=3	15.96	26.38	10	1.03183	0.671857	18.16	34.13	10	1.04098	0.527827	20.85	34.72	10	0.986384	0.941302	1.01973	0.029241
sp|Q920L2|SDHA_RAT	Succinate dehydrogenase [ubiquinone] flavoprotein subunit, mitochondrial OS=Rattus norvegicus GN=Sdha PE=1 SV=1	46.58	58.38	24	1.07334	0.0632187	47.39	58.08	24	1.04194	0.465251	45.8	60.06	23	0.944158	0.47568	1.01981	0.0673736
tr|Q0D2L6|Q0D2L6_RAT	Ras-related GTP-binding C OS=Rattus norvegicus GN=Rragc PE=1 SV=1	4.37	17.09	2	1.11899	0.596189	6	16.58	3	0.90508	0.501135	7.6	17.34	4	1.03579	0	1.01995	0.107829
sp|Q7TP36|SHRM2_RAT	Protein Shroom2 OS=Rattus norvegicus GN=Shroom2 PE=1 SV=1	10.94	25.16	7	1.09517	0.290896	11.91	25.16	7	1.04149	0.829338	15.32	26.63	9	0.923353	0.667214	1.02	0.0878985
sp|O08839|BIN1_RAT	Myc box-dependent-interacting protein 1 OS=Rattus norvegicus GN=Bin1 PE=1 SV=1	45.68	54.59	22	1.19948	0.30735	49.16	53.91	25	0.955025	0.607611	42.85	50.68	20	0.905527	0.512458	1.02001	0.157384
sp|P04642|LDHA_RAT	L-lactate dehydrogenase A chain OS=Rattus norvegicus GN=Ldha PE=1 SV=1	36.65	60.84	18	0.965387	0.831973	42.95	73.19	23	0.988115	0.893977	35.84	68.07	17	1.10657	0.136533	1.02003	0.0758092
tr|A0A0G2K1C0|A0A0G2K1C0_RAT	Actin-related protein 3 OS=Rattus norvegicus GN=Actr3 PE=1 SV=1	41.45	65.87	20	1.0469	0.781434	39.43	59.19	20	0.960964	0.53554	41.03	58.95	21	1.05243	0.475632	1.0201	0.0512844
sp|P62982|RS27A_RAT	Ubiquitin-40S ribosomal protein S27a OS=Rattus norvegicus GN=Rps27a PE=1 SV=2	17.01	72.44	9	0.965196	0.931738	19.31	63.46	10	1.12458	0.650626	20.27	55.13	10	0.970662	0.803082	1.02014	0.0904813
sp|P84087|CPLX2_RAT	Complexin-2 OS=Rattus norvegicus GN=Cplx2 PE=1 SV=1	8.1	67.91	4	1.00307	0.988409	7.96	70.15	4	1.13914	0.440704	8.1	60.45	4	0.918876	0.599757	1.02036	0.111146
tr|A0A096MJN4|A0A096MJN4_RAT	Septin 4 OS=Rattus norvegicus GN=Sept4 PE=1 SV=1	29.51	49.02	15	1.1925	0.0953776	33	55.34	18	1.01307	0.834634	25.52	47.28	14	0.855543	0.0379606	1.02037	0.168598
sp|Q641Y2|NDUS2_RAT	NADH dehydrogenase [ubiquinone] iron-sulfur protein 2, mitochondrial OS=Rattus norvegicus GN=Ndufs2 PE=1 SV=1	26.58	49.24	14	1.04172	0.573675	29.66	55.94	15	1.03939	0.807017	32.27	62.63	16	0.980155	0.824783	1.02042	0.0348938
sp|Q68FQ0|TCPE_RAT	T-complex protein 1 subunit epsilon OS=Rattus norvegicus GN=Cct5 PE=1 SV=1	38.67	52.5	19	1.19577	0.026389	42.92	56.38	21	0.900895	0.364477	44.27	56.19	23	0.964881	0.475073	1.02052	0.155113
tr|D4A8H8|D4A8H8_RAT	Cytoplasmic FMR1 interacting protein 1 (Predicted) OS=Rattus norvegicus GN=Cyfip1 PE=1 SV=1	36.65	33.12	20	0.893529	0.679125	40.9	38.95	20	1.00961	0.889796	41.83	35.43	21	1.1585	0.0761394	1.02055	0.132824
sp|P61765|STXB1_RAT	Syntaxin-binding protein 1 OS=Rattus norvegicus GN=Stxbp1 PE=1 SV=1	72.33	66.16	35	1.07193	0.271926	67.42	71.72	33	1.03854	0.700286	66.92	70.88	33	0.951238	0.567164	1.02057	0.0623201
sp|P05197|EF2_RAT	Elongation factor 2 OS=Rattus norvegicus GN=Eef2 PE=1 SV=4	70.11	53.61	36	1.10227	0.0502834	71.53	57.11	35	0.930897	0.464795	71.58	52.1	35	1.02868	0.562626	1.02062	0.0859693
tr|A1A5L1|A1A5L1_RAT	Bleomycin hydrolase OS=Rattus norvegicus GN=Blmh PE=1 SV=1	14.41	38.68	7	1.04711	0.437765	15.96	31.21	8	1.05023	0.549499	15.57	34.73	8	0.964529	0.750077	1.02062	0.0486047
sp|Q62651|ECH1_RAT	Delta(3,5)-Delta(2,4)-dienoyl-CoA isomerase, mitochondrial OS=Rattus norvegicus GN=Ech1 PE=1 SV=2	12	38.23	7	0.912638	0.368437	13.89	50.76	7	1.005	0.959746	11.36	37	7	1.14472	0.145197	1.02079	0.116845
tr|F1LQT3|F1LQT3_RAT	Rho-associated protein kinase OS=Rattus norvegicus GN=Rock2 PE=1 SV=3	18.73	41.8	11	0.961867	0.772955	22.11	39.77	12	1.17053	0.501123	25.01	42.24	14	0.930019	0.54221	1.02081	0.130641
tr|D4A2D7|D4A2D7_RAT	Importin 4 OS=Rattus norvegicus GN=Ipo4 PE=1 SV=2	4.93	12.77	2	1.16082	0.640537	6.95	18.69	5	0.913868	0.244125	5.04	15.54	4	0.987984	0.94658	1.02089	0.126723
tr|Q6P6U2|Q6P6U2_RAT	26S proteasome regulatory subunit 6A OS=Rattus norvegicus GN=Psmc3 PE=1 SV=1	24.43	57.92	12	1.0151	0.838539	24.8	64.71	12	0.984132	0.808533	33.09	71.95	16	1.06386	0.647105	1.02103	0.0401928
tr|Q3KRF2|Q3KRF2_RAT	High density lipoprotein binding protein (Vigilin) OS=Rattus norvegicus GN=Hdlbp PE=1 SV=1	42.58	40.93	21	0.850703	0.230873	38.27	49.29	19	1.0285	0.839282	50.52	50.87	25	1.18474	0.374665	1.02131	0.167134
sp|Q68FX0|IDH3B_RAT	Isocitrate dehydrogenase [NAD] subunit beta, mitochondrial OS=Rattus norvegicus GN=Idh3B PE=2 SV=1	36.65	66.23	19	0.987939	0.879044	37.64	66.23	18	1.06488	0.689882	37.31	61.82	18	1.0113	0.879671	1.02137	0.0394483
tr|G3V960|G3V960_RAT	Guanidinoacetate N-methyltransferase OS=Rattus norvegicus GN=Gamt PE=1 SV=1	4.97	32.2	3	1.01224	0.925287	6.28	43.22	3	0.968586	0.676378	8.05	54.24	4	1.08351	0.42246	1.02144	0.0580125
sp|Q5XIT9|MCCB_RAT	Methylcrotonoyl-CoA carboxylase beta chain, mitochondrial OS=Rattus norvegicus GN=Mccc2 PE=2 SV=1	28.42	47.78	14	1.09407	0.104924	24.46	56.84	12	0.946777	0.337532	28.39	48.49	14	1.02401	0.699411	1.02162	0.0736765
sp|P27605|HPRT_RAT	Hypoxanthine-guanine phosphoribosyltransferase OS=Rattus norvegicus GN=Hprt1 PE=1 SV=1	13.38	45.87	7	1.13728	0.0698692	16.73	58.26	9	1.03199	0.808696	18.25	53.21	10	0.895739	0.472362	1.02167	0.121102
sp|P36201|CRIP2_RAT	Cysteine-rich protein 2 OS=Rattus norvegicus GN=Crip2 PE=2 SV=1	8.39	71.15	4	1.09957	0.207934	8.23	63.94	4	0.953699	0.702452	7.74	65.87	5	1.01188	0.957117	1.02172	0.0734284
tr|Q642E5|Q642E5_RAT	Diphosphomevalonate decarboxylase OS=Rattus norvegicus GN=Mvd PE=1 SV=1	17.7	54.61	9	1.22361	0.258799	15.75	39.65	8	0.95113	0.532801	12.85	46.88	7	0.891066	0.484791	1.02193	0.177216
sp|P11884|ALDH2_RAT	Aldehyde dehydrogenase, mitochondrial OS=Rattus norvegicus GN=Aldh2 PE=1 SV=1	46.17	53.95	23	0.919782	0.0840935	49.38	51.83	24	1.02594	0.8614	48.4	52.22	25	1.12101	0.585813	1.02224	0.100666
sp|Q5RKI0|WDR1_RAT	WD repeat-containing protein 1 OS=Rattus norvegicus GN=Wdr1 PE=1 SV=3	47.95	64.36	25	1.11576	0.31483	48.91	63.2	25	0.955995	0.641738	51.63	63.7	25	0.995078	0.948989	1.02228	0.0832819
sp|Q80W89|NDUAB_RAT	NADH dehydrogenase [ubiquinone] 1 alpha subcomplex subunit 11 OS=Rattus norvegicus GN=Ndufa11 PE=2 SV=1	8	38.3	4	0.974049	0.745659	10	38.3	5	1.13125	0.222235	12.05	39.01	6	0.961947	0.622529	1.02242	0.0944493
tr|B0BNJ1|B0BNJ1_RAT	LOC683667 protein OS=Rattus norvegicus GN=Sri PE=1 SV=1	14.51	54.55	9	1.0616	0.263211	14.27	57.07	8	0.974699	0.716267	15.84	55.56	8	1.03107	0.684455	1.02246	0.0440876
sp|P04636|MDHM_RAT	Malate dehydrogenase, mitochondrial OS=Rattus norvegicus GN=Mdh2 PE=1 SV=2	41.25	66.27	24	1.0328	0.342893	42.85	69.23	22	1.07462	0.227472	41.31	68.05	24	0.960241	0.465448	1.02256	0.0578755
sp|O88775|EMB_RAT	Embigin OS=Rattus norvegicus GN=Emb PE=1 SV=1	8.2	34.45	5	1.10144	0.434595	8.06	34.15	5	1.10967	0.682258	10.49	41.16	5	0.856671	0.441242	1.02259	0.143753
tr|D3ZN61|D3ZN61_RAT	Leucine-rich repeat LGI family, member 3 OS=Rattus norvegicus GN=Lgi3 PE=4 SV=1	22.33	40.15	10	1.03009	0.493159	24.73	35.22	13	0.983469	0.921467	24.64	40.15	12	1.05464	0.359596	1.02273	0.0361514
tr|Q5XI21|Q5XI21_RAT	Target of myb1 homolog (Chicken) OS=Rattus norvegicus GN=Tom1 PE=1 SV=1	12.57	29.07	7	1.00831	0.928027	8.72	34.35	5	1.04499	0.817825	7.32	25.61	4	1.01491	0.845985	1.02274	0.019556
tr|M0R5N4|M0R5N4_RAT	Prefoldin subunit 4 OS=Rattus norvegicus GN=Pfdn4 PE=1 SV=2	5.86	37.41	3	0.9972	0.976127	5.68	37.41	3	1.04363	0.695411	4.45	48.2	2	1.0277	0.853219	1.02284	0.0235937
sp|O88377|PI42B_RAT	Phosphatidylinositol 5-phosphate 4-kinase type-2 beta OS=Rattus norvegicus GN=Pip4k2b PE=1 SV=1	19.54	39.18	10	1.0166	0.866587	21.52	44.71	11	1.01962	0.786466	14.79	36.3	8	1.03256	0.680343	1.02293	0.00847694
tr|A0A0G2KAI8|A0A0G2KAI8_RAT	Developmentally-regulated GTP-binding protein 2 OS=Rattus norvegicus GN=Drg2 PE=1 SV=1	6.34	37.36	3	0.971751	0.764245	6	26.92	4	1.13696	0.458136	4.99	29.95	3	0.960106	0.685552	1.02294	0.0989188
tr|A1L1J8|A1L1J8_RAT	RAB5B, member RAS oncogene family OS=Rattus norvegicus GN=Rab5b PE=1 SV=1	18.27	63.26	9	0.998206	0.987343	17.11	60	10	1.08161	0.686758	16.94	64.65	8	0.989543	0.961094	1.02312	0.0508371
tr|Q6QI09|Q6QI09_RAT	ATP synthase subunit gamma, mitochondrial OS=Rattus norvegicus GN=Taf3 PE=1 SV=1	16.85	25.37	8	1.05299	0.350771	16.08	24.38	8	1.03796	0.494686	16.3	23.56	8	0.97848	0.683559	1.02315	0.0394041
tr|A0A140UHX6|A0A140UHX6_RAT	Spectrin beta chain OS=Rattus norvegicus GN=Sptb PE=1 SV=1	39.69	33.23	23	1.13594	0.126363	28.98	30.27	17	0.912845	0.601885	31.27	30.96	18	1.02078	0.884404	1.02319	0.111568
sp|Q64560|TPP2_RAT	Tripeptidyl-peptidase 2 OS=Rattus norvegicus GN=Tpp2 PE=2 SV=3	35.26	36.99	18	0.976137	0.696194	48.06	39.39	25	1.05064	0.496428	44.67	43.55	23	1.04323	0.552133	1.02333	0.041042
sp|Q6AY23|P5CR2_RAT	Pyrroline-5-carboxylate reductase 2 OS=Rattus norvegicus GN=Pycr2 PE=2 SV=1	13.29	33.44	6	1.04627	0.694496	15.18	30.94	8	0.926842	0.47802	14.17	42.5	7	1.09715	0.385701	1.02342	0.0874245
sp|Q7TQ16|QCR8_RAT	Cytochrome b-c1 complex subunit 8 OS=Rattus norvegicus GN=Uqcrq PE=3 SV=1	4.05	45.12	3	1.02338	0.843777	5.94	45.12	3	1.07348	0.611512	5.09	48.78	3	0.973586	0.864057	1.02348	0.0499444
sp|P10111|PPIA_RAT	Peptidyl-prolyl cis-trans isomerase A OS=Rattus norvegicus GN=Ppia PE=1 SV=2	21.92	76.83	13	1.07807	0.280343	23.73	82.32	14	1.00916	0.884206	22.75	78.05	15	0.983623	0.874743	1.02362	0.0488577
sp|D4A3K5|H11_RAT	Histone H1.1 OS=Rattus norvegicus GN=Hist1h1a PE=1 SV=1	6.1	16.36	3	1.10403	0.890248	6	16.82	3	1.13539	0	6.01	19.63	3	0.83147	0.96372	1.02363	0.16715
tr|F1LN59|F1LN59_RAT	Eukaryotic translation initiation factor 4, gamma 2 OS=Rattus norvegicus GN=Eif4g2 PE=1 SV=2	17.47	35.43	9	1.09037	0.422183	11.88	19.65	7	1.02915	0.752298	16.99	32.56	9	0.95267	0.850727	1.02406	0.0689917
tr|F1LRI5|F1LRI5_RAT	GCN1 eIF2 alpha kinase activator-like 1 OS=Rattus norvegicus GN=Gcn1l1 PE=1 SV=3	7.67	19.66	6	1.1276	0.620178	17.83	25.12	12	0.902493	0.760101	5.75	28.04	7	1.04217	0.857879	1.02409	0.113639
tr|D4A6C5|D4A6C5_RAT	Rho GTPase-activating protein 1 OS=Rattus norvegicus GN=Arhgap1 PE=1 SV=1	9.4	23.92	6	0.927759	0.34197	8.78	26.42	5	1.07937	0.73391	8.08	25.51	4	1.06515	0.781451	1.0241	0.0837316
sp|Q32Q06|AP1M1_RAT	AP-1 complex subunit mu-1 OS=Rattus norvegicus GN=Ap1m1 PE=1 SV=3	11.66	34.52	6	1.02474	0.865211	15.89	49.65	9	1.03169	0.778364	21.34	59.34	10	1.01644	0.891452	1.02429	0.00763285
sp|O55173|PDPK1_RAT	3-phosphoinositide-dependent protein kinase 1 OS=Rattus norvegicus GN=Pdpk1 PE=1 SV=2	4.58	33.09	3	1.07232	0.611735	9.85	32.56	6	1.07533	0.62556	13.58	40.07	7	0.925282	0.552851	1.02431	0.0857726
sp|Q5HZV9|PP1R7_RAT	Protein phosphatase 1 regulatory subunit 7 OS=Rattus norvegicus GN=Ppp1r7 PE=1 SV=1	29.43	62.78	15	1.00757	0.906718	35.61	58.33	19	1.10166	0.590168	35.25	64.44	18	0.963908	0.564907	1.02438	0.0703946
sp|B0BNN3|CAH1_RAT	Carbonic anhydrase 1 OS=Rattus norvegicus GN=Ca1 PE=1 SV=1	22	64.37	12	1.11806	0.103612	21.37	76.25	12	0.751198	0.00364987	22.2	62.07	11	1.20395	0.0597202	1.0244	0.240466
sp|Q8K3P6|SCMC2_RAT	Calcium-binding mitochondrial carrier protein SCaMC-2 OS=Rattus norvegicus GN=Slc25a25 PE=1 SV=1	12.85	39.66	6	0.974331	0.888121	22.66	35.39	11	1.06735	0.330489	16.95	43.92	8	1.03228	0.796465	1.02465	0.0469752
sp|Q66H80|COPD_RAT	Coatomer subunit delta OS=Rattus norvegicus GN=Arcn1 PE=2 SV=1	14.52	43.84	8	1.00492	0.977249	10.98	39.14	6	0.981194	0.9412	19.94	41.29	10	1.08843	0.735203	1.02485	0.0563296
tr|A0A0H2UHF9|A0A0H2UHF9_RAT	Actin-binding LIM protein 2 OS=Rattus norvegicus GN=Ablim2 PE=1 SV=1	26.01	43.98	12	1.17563	0.00495711	24.83	46.25	12	0.822003	0	25.77	41.71	13	1.07693	0.354693	1.02486	0.182475
sp|Q62698|DC1L2_RAT	Cytoplasmic dynein 1 light intermediate chain 2 OS=Rattus norvegicus GN=Dync1li2 PE=1 SV=1	21.12	45.88	10	1.14054	0.778662	28.01	44.06	15	1.03082	0.880865	28.02	45.07	14	0.903574	0.33459	1.02498	0.118589
sp|P05714|RAB4A_RAT	Ras-related protein Rab-4A OS=Rattus norvegicus GN=Rab4a PE=1 SV=3	13.61	46.33	7	1.08181	0.45694	13.55	51.83	7	0.949557	0.528586	10.24	44.95	5	1.04371	0.699561	1.02503	0.0680783
sp|Q9ESS6|BCAM_RAT	Basal cell adhesion molecule OS=Rattus norvegicus GN=Bcam PE=2 SV=1	9.56	19.23	5	1.03131	0.839227	4.12	20.99	2	0.986488	0.936836	9.41	20.03	5	1.0578	0.729271	1.0252	0.0360481
sp|P04897|GNAI2_RAT	Guanine nucleotide-binding protein G(i) subunit alpha-2 OS=Rattus norvegicus GN=Gnai2 PE=1 SV=3	38.18	65.92	19	1.1106	0.233277	34.57	64.51	17	0.955797	0.409317	34.64	63.1	17	1.00925	0.905988	1.02521	0.0786254
sp|P18422|PSA3_RAT	Proteasome subunit alpha type-3 OS=Rattus norvegicus GN=Psma3 PE=1 SV=3	19.63	49.02	12	0.998422	0.992042	13.44	46.67	8	0.984456	0.881205	12.7	49.8	7	1.09294	0.273332	1.02527	0.0590146
sp|Q6AYS7|ACY1A_RAT	Aminoacylase-1A OS=Rattus norvegicus GN=Acy1a PE=1 SV=1	26.42	50.25	13	1.00977	0.902238	29.31	56.13	14	1.02983	0.715239	27.45	60.05	14	1.03652	0.699421	1.02537	0.0139198
sp|P63322|RALA_RAT	Ras-related protein Ral-A OS=Rattus norvegicus GN=Rala PE=1 SV=1	11.7	33.98	6	1.00474	0.951623	11.65	33.5	6	1.0825	0.367093	10.12	34.95	5	0.9892	0.866978	1.02548	0.0499864
sp|Q4V8K5|BROX_RAT	BRO1 domain-containing protein BROX OS=Rattus norvegicus GN=Brox PE=2 SV=1	4.18	27.74	4	1.20938	0.794882	4.82	27.98	2	0.964744	0.895533	3.94	28.95	3	0.90236	0.869807	1.0255	0.162276
sp|P46462|TERA_RAT	Transitional endoplasmic reticulum ATPase OS=Rattus norvegicus GN=Vcp PE=1 SV=3	79.21	69.35	40	1.0474	0.341025	87.17	73.95	46	0.983569	0.671669	88.85	70.84	43	1.04615	0.515018	1.02571	0.0364973
tr|F1M3W5|F1M3W5_RAT	Dmx-like 2 OS=Rattus norvegicus GN=Dmxl2 PE=1 SV=3	62.43	30.01	33	1.0471	0.485979	68.47	31.51	40	1.0533	0.357387	74.27	35.44	41	0.977709	0.729878	1.02604	0.0419688
sp|Q8R431|MGLL_RAT	Monoglyceride lipase OS=Rattus norvegicus GN=Mgll PE=1 SV=1	10.15	46.53	5	0.995264	0.963382	13.54	58.42	7	1.00262	0.976407	14.44	56.77	9	1.08063	0.656448	1.02617	0.0473067
tr|A0A0G2JSH2|A0A0G2JSH2_RAT	3-hydroxybutyrate dehydrogenase, type 1, isoform CRA_a OS=Rattus norvegicus GN=Bdh1 PE=1 SV=1	15.97	46.51	8	0.986357	0.907751	12.57	45.93	7	1.22281	0.242202	12.27	51.16	6	0.869427	0.387213	1.0262	0.18003
tr|G3V6U3|G3V6U3_RAT	ALG2, alpha-1,3/1,6-mannosyltransferase OS=Rattus norvegicus GN=Alg2 PE=1 SV=1	19.86	51.57	11	0.995275	0.961462	19.51	42.89	10	1.01378	0.887518	20.05	44.58	10	1.06956	0.364568	1.0262	0.0386681
sp|P82995|HS90A_RAT	Heat shock protein HSP 90-alpha OS=Rattus norvegicus GN=Hsp90aa1 PE=1 SV=3	94.78	63.98	48	1.08499	0.0938795	97.16	63.71	50	0.970031	0.483771	98.55	62.89	48	1.02463	0.578961	1.02655	0.0575055
sp|Q6Q7Y5|GNA13_RAT	Guanine nucleotide-binding protein subunit alpha-13 OS=Rattus norvegicus GN=Gna13 PE=1 SV=1	17.61	58.09	10	1.07078	0.340396	17.13	53.32	8	0.986847	0.872286	17.45	51.19	9	1.02239	0.79554	1.02667	0.0421311
sp|Q641Z6|EHD1_RAT	EH domain-containing protein 1 OS=Rattus norvegicus GN=Ehd1 PE=1 SV=1	35.83	49.06	18	1.04028	0.601371	33.74	48.88	17	1.00539	0.948407	41.12	54.31	20	1.03447	0.736471	1.02671	0.0186953
tr|B0BNK1|B0BNK1_RAT	RAB5C, member RAS oncogene family OS=Rattus norvegicus GN=Rab5c PE=1 SV=1	16.25	61.11	8	1.04314	0.633568	19.14	47.69	10	0.958852	0.867342	16.4	64.81	9	1.07846	0.35352	1.02682	0.0614523
tr|B4F7C2|B4F7C2_RAT	Tubulin beta chain OS=Rattus norvegicus GN=Tubb4a PE=1 SV=1	60.35	77.03	36	1.22065	0.0351309	62.64	78.15	41	0.87331	0.201608	59.48	75.9	36	0.986668	0.892587	1.02688	0.177126
sp|P62329|TYB4_RAT	Thymosin beta-4 OS=Rattus norvegicus GN=Tmsb4x PE=1 SV=2	7.17	56.82	4	0.930115	0.534289	9.32	56.82	5	1.05618	0.579421	6.71	56.82	4	1.09492	0.521202	1.02707	0.0861729
tr|G3V7L6|G3V7L6_RAT	26S proteasome regulatory subunit 7 OS=Rattus norvegicus GN=Psmc2 PE=1 SV=1	34.57	63.74	18	1.00099	0.987829	29.95	51.5	14	1.03568	0.730273	28	58.2	13	1.04456	0.576087	1.02708	0.0230261
sp|P05065|ALDOA_RAT	Fructose-bisphosphate aldolase A OS=Rattus norvegicus GN=Aldoa PE=1 SV=2	60.47	91.21	37	1.01967	0.846936	65.63	88.19	39	1.00305	0.97317	63.64	87.64	38	1.05875	0.626694	1.02716	0.0285981
tr|G3V6S2|G3V6S2_RAT	Cytoplasmic aconitate hydratase OS=Rattus norvegicus GN=Aco1 PE=1 SV=1	38.2	44.88	18	1.05537	0.611082	34.81	44.54	18	1.01799	0.854336	41.4	43.42	20	1.00815	0.860827	1.02717	0.0249097
tr|A0A0G2K4H3|A0A0G2K4H3_RAT	Uncharacterized protein (Fragment) OS=Rattus norvegicus PE=4 SV=1	12.39	39.91	7	0.936859	0.62982	12.46	40.35	6	1.1368	0.211259	13.98	52.63	7	1.00922	0.893383	1.02763	0.101233
sp|Q99N27|SNX1_RAT	Sorting nexin-1 OS=Rattus norvegicus GN=Snx1 PE=1 SV=1	20.93	44.83	9	0.981438	0.84844	22.43	38.7	11	1.07913	0.366266	22.38	49.23	10	1.02234	0.771238	1.02764	0.049063
sp|Q6AXU6|JUPI1_RAT	Jupiter microtubule associated homolog 1 OS=Rattus norvegicus GN=JPT1 PE=1 SV=3	4.01	38.93	2	1.05955	0.663001	4.02	40.27	2	0.95602	0	6.01	32.21	3	1.06736	0.576605	1.02764	0.0621502
tr|B0BN30|B0BN30_RAT	Mitochondrial carrier 1 OS=Rattus norvegicus GN=Mtch1 PE=1 SV=1	7.35	40.1	3	1.10816	0.318324	13.49	47.04	7	1.02505	0.872451	11.63	37.28	7	0.950101	0.629966	1.02777	0.0790663
sp|B0BND0|ENPP6_RAT	Ectonucleotide pyrophosphatase/phosphodiesterase family member 6 OS=Rattus norvegicus GN=Enpp6 PE=1 SV=1	22.34	44.77	12	1.14909	0.126144	22.11	45.68	11	0.961921	0.661728	24.74	44.77	13	0.972627	0.894583	1.02788	0.105105
sp|Q5M7A7|CNRP1_RAT	CB1 cannabinoid receptor-interacting protein 1 OS=Rattus norvegicus GN=Cnrip1 PE=1 SV=1	7.32	50.61	4	0.907781	0.288514	13.57	69.51	7	1.12616	0.752446	12.79	70.12	8	1.05012	0.90193	1.02802	0.110853
sp|P62815|VATB2_RAT	V-type proton ATPase subunit B, brain isoform OS=Rattus norvegicus GN=Atp6v1b2 PE=1 SV=1	43.06	56.16	23	1.07976	0.335709	51.74	60.27	28	1.01823	0.921214	52.27	69.08	26	0.986792	0.951707	1.02826	0.0472872
tr|F1LPP0|F1LPP0_RAT	Amphiphysin OS=Rattus norvegicus GN=Amph PE=1 SV=3	36.65	45.37	17	1.0835	0.249788	41.41	44.49	20	1.06206	0.502384	39.98	41.26	20	0.93938	0.287565	1.02831	0.0777615
sp|Q5RJR2|TWF1_RAT	Twinfilin-1 OS=Rattus norvegicus GN=Twf1 PE=1 SV=1	16.63	39.43	9	1.16679	0.119521	14.27	35.14	7	0.88541	0.594102	13.71	40.29	7	1.03322	0.946841	1.02847	0.140751
tr|A0A0G2JSW3|A0A0G2JSW3_RAT	Globin a4 OS=Rattus norvegicus GN=Hbb PE=1 SV=1	33.05	80.27	21	0.970226	0.941293	35.13	80.27	22	0.855166	0.0775675	29.62	85.03	20	1.26031	0.0259018	1.02857	0.208777
tr|F1M062|F1M062_RAT	La ribonucleoprotein domain family, member 1 OS=Rattus norvegicus GN=Larp1 PE=1 SV=3	3.37	27.93	3	0.883336	0.428579	11.41	24.38	6	0.778552	0.524441	7.51	28.68	5	1.42393	0	1.02861	0.346344
sp|P68101|IF2A_RAT	Eukaryotic translation initiation factor 2 subunit 1 OS=Rattus norvegicus GN=Eif2s1 PE=1 SV=2	15.8	70.48	8	0.90933	0.571782	14.59	62.54	6	1.00621	0.970303	12.79	67.94	8	1.17029	0.246124	1.02861	0.131914
sp|Q4V8C3|EMAL1_RAT	Echinoderm microtubule-associated protein-like 1 OS=Rattus norvegicus GN=Eml1 PE=1 SV=2	43.41	41.65	22	1.07814	0.675045	32.42	43.98	16	1.04116	0.743376	31.72	37.71	16	0.966848	0.791527	1.02872	0.0566781
tr|A0A096MJG7|A0A096MJG7_RAT	Nebulette (Fragment) OS=Rattus norvegicus GN=Nebl PE=4 SV=1	10.55	55.56	6	0.913879	0.23847	11.76	70.63	7	1.0986	0.383448	10.75	86.51	6	1.07389	0.633189	1.02879	0.100281
sp|Q6P7Q4|LGUL_RAT	Lactoylglutathione lyase OS=Rattus norvegicus GN=Glo1 PE=1 SV=3	17.67	52.72	9	1.05096	0.35394	19.47	64.67	10	1.03398	0.462778	20.5	64.67	11	1.0019	0.993346	1.02895	0.0249103
tr|G3V648|G3V648_RAT	1-acylglycerol-3-phosphate O-acyltransferase 3 OS=Rattus norvegicus GN=Agpat3 PE=1 SV=1	9.37	29.52	5	1.05462	0.788542	11.4	28.46	6	1.02995	0.854528	9.13	28.46	5	1.0023	0.989366	1.02896	0.0261742
tr|A0A140TAB6|A0A140TAB6_RAT	Golgin subfamily A member 2 OS=Rattus norvegicus GN=Golga2 PE=1 SV=1	8.05	31.74	4	0.874238	0.25264	6.2	26.47	3	1.24369	0.384365	4.99	22.62	3	0.970056	0.876603	1.02933	0.191725
sp|P25093|FAAA_RAT	Fumarylacetoacetase OS=Rattus norvegicus GN=Fah PE=1 SV=1	18.4	42.24	10	1.1473	0.0453917	20.22	32.7	11	0.959492	0.534631	20.48	37.23	10	0.982088	0.848102	1.02963	0.102535
sp|Q6JAM9|TM35A_RAT	Transmembrane protein 35A OS=Rattus norvegicus GN=Tmem35a PE=1 SV=1	5.94	29.34	4	0.906916	0.475253	7.45	30.54	4	1.12466	0.424004	3.46	34.13	2	1.05748	0.534512	1.02969	0.111502
sp|Q6AYT7|ABD12_RAT	Monoacylglycerol lipase ABHD12 OS=Rattus norvegicus GN=Abhd12 PE=2 SV=1	17.22	49.75	10	1.02514	0.667875	25.39	54.77	13	1.03175	0.804043	18.47	50.75	10	1.03271	0.778882	1.02987	0.0041201
sp|P18163|ACSL1_RAT	Long-chain-fatty-acid--CoA ligase 1 OS=Rattus norvegicus GN=Acsl1 PE=1 SV=1	21	42.49	11	1.06185	0.668419	19.35	36.91	11	0.960443	0.847332	17.16	39.2	8	1.06737	0.832301	1.02989	0.0602045
tr|F1M9N9|F1M9N9_RAT	Ankyrin 2 OS=Rattus norvegicus GN=Ank2 PE=1 SV=3	123.38	40.1	78	0.938708	0.823527	134.57	42.86	80	1.12401	0.825496	128.18	39.84	75	1.02697	0.576739	1.02989	0.0926838
tr|F1M392|F1M392_RAT	LIM and calponin homology domains 1 OS=Rattus norvegicus GN=Limch1 PE=1 SV=2	26.8	38.62	13	0.926952	0.598443	27.36	41.01	14	1.04397	0.698375	26.31	40	13	1.11914	0.1754	1.03002	0.0968486
tr|D4A249|D4A249_RAT	Metallo-beta-lactamase domain-containing 2 OS=Rattus norvegicus GN=Mblac2 PE=1 SV=1	7.45	37.63	4	1.05074	0.66903	7.94	50.54	5	1.08365	0.303141	7	46.59	4	0.955759	0.761261	1.03005	0.0664102
sp|P05370|G6PD_RAT	Glucose-6-phosphate 1-dehydrogenase OS=Rattus norvegicus GN=G6pdx PE=1 SV=3	43.04	68.35	21	1.1165	0.142698	49.75	64.66	25	0.945079	0.330862	49.83	58.83	25	1.02867	0.657269	1.03008	0.0857173
sp|Q9EPF2|MUC18_RAT	Cell surface glycoprotein MUC18 OS=Rattus norvegicus GN=Mcam PE=1 SV=2	5.78	16.51	3	0.979473	0.89388	4.49	22.99	2	1.02942	0.854438	4.19	25.15	2	1.08169	0.83885	1.0302	0.0511148
sp|P07722|MAG_RAT	Myelin-associated glycoprotein OS=Rattus norvegicus GN=Mag PE=1 SV=1	27.52	32.59	13	1.06037	0.341589	34.12	38.82	18	1.02381	0.609756	32.39	35.14	15	1.00673	0.945704	1.03031	0.0274048
tr|Q3ZAU6|Q3ZAU6_RAT	RING-type E3 ubiquitin transferase OS=Rattus norvegicus GN=Rnf14 PE=1 SV=1	22.02	34.86	11	1.02625	0.76905	19.06	28.81	10	1.08907	0.186034	21.54	35.91	12	0.975985	0.738748	1.03044	0.0566607
sp|Q9JMI1|AACS_RAT	Acetoacetyl-CoA synthetase OS=Rattus norvegicus GN=Aacs PE=1 SV=1	16.56	29.02	9	1.31025	0.0269959	16.83	20.39	8	0.910792	0.551388	13.39	22.77	7	0.870321	0.0959407	1.03045	0.243151
sp|P12368|KAP2_RAT	cAMP-dependent protein kinase type II-alpha regulatory subunit OS=Rattus norvegicus GN=Prkar2a PE=1 SV=4	27.83	58.6	15	1.11336	0.591585	28.98	53.87	14	1.01361	0.912499	28.87	64.09	14	0.964739	0.732272	1.03057	0.075749
tr|D3ZCA0|D3ZCA0_RAT	Pyridoxal phosphate homeostasis protein OS=Rattus norvegicus GN=Plpbp PE=1 SV=1	16.14	49.82	9	1.07162	0.360148	14.9	60	7	1.04345	0.68959	14.86	58.91	7	0.976693	0.837431	1.03059	0.0487538
tr|A0A0G2JSJ2|A0A0G2JSJ2_RAT	UMP-CMP kinase OS=Rattus norvegicus GN=Cmpk1 PE=1 SV=1	12.74	46.26	7	1.0081	0.885449	18.08	56.39	9	1.0427	0.692393	15.36	59.03	8	1.04111	0.591403	1.03064	0.0195347
sp|P07323|ENOG_RAT	Gamma-enolase OS=Rattus norvegicus GN=Eno2 PE=1 SV=2	44.53	75.58	24	1.01583	0.869874	42.34	70.05	23	1.14554	0.0496592	46.24	70.74	25	0.93082	0.409429	1.03073	0.108132
sp|Q7M0E3|DEST_RAT	Destrin OS=Rattus norvegicus GN=Dstn PE=1 SV=3	17.7	65.45	8	1.0669	0.607477	19.93	71.52	9	0.994568	0.945788	20.29	67.27	10	1.0309	0.742768	1.03079	0.0361653
tr|D3ZZB0|D3ZZB0_RAT	Disco-interacting protein 2 homolog C OS=Rattus norvegicus GN=Dip2c PE=1 SV=2	14.78	19.23	9	0.861799	0.560598	16.96	26.73	11	0.975864	0.742745	23.32	22.45	13	1.25493	0.261059	1.03086	0.202254
sp|Q62636|RAP1B_RAT	Ras-related protein Rap-1b OS=Rattus norvegicus GN=Rap1b PE=1 SV=2	13.09	52.17	7	0.916729	0.924472	16.31	55.98	8	1.08433	0.622032	17.92	49.46	10	1.09157	0.697228	1.03087	0.0989186
sp|P55051|FABP7_RAT	Fatty acid-binding protein, brain OS=Rattus norvegicus GN=Fabp7 PE=1 SV=2	7.96	56.82	5	1.07945	0.795475	8.04	61.36	5	0.955546	0.742409	8.03	48.48	5	1.05812	0.760123	1.03104	0.0662412
sp|Q9QYU2|EFTS_RAT	Elongation factor Ts, mitochondrial OS=Rattus norvegicus GN=Tsfm PE=2 SV=1	8	33.64	4	1.21479	0.183488	6.02	18.52	3	0.87828	0.494334	7.7	26.85	5	1.00026	0.99849	1.03111	0.170362
tr|D3ZNQ6|D3ZNQ6_RAT	Ubiquitin-conjugating enzyme E2M OS=Rattus norvegicus GN=Ube2m PE=1 SV=1	14.15	51.91	8	1.07909	0.542549	9.14	48.09	4	1.025	0.697772	12.03	58.47	7	0.989421	0.880624	1.03117	0.0451494
tr|G3V6H9|G3V6H9_RAT	Nucleosome assembly protein 1-like 1 OS=Rattus norvegicus GN=Nap1l1 PE=1 SV=1	17.51	22.51	9	1.09067	0.273489	14.38	27.37	7	0.967931	0.609421	15.33	24.04	8	1.0352	0.658822	1.03127	0.0614666
tr|D3Z9I1|D3Z9I1_RAT	Cytochrome C oxidase assembly factor 3 OS=Rattus norvegicus GN=Coa3 PE=1 SV=1	3.68	59.26	2	1.02902	0.820393	3.15	56.48	2	1.1005	0.375324	3.39	61.11	2	0.964398	0.711523	1.03131	0.0680807
sp|Q63377|AT1B3_RAT	Sodium/potassium-transporting ATPase subunit beta-3 OS=Rattus norvegicus GN=Atp1b3 PE=2 SV=1	11.58	34.05	6	0.955577	0.594712	11.6	45.88	6	1.0973	0.221484	8.77	38.71	4	1.04108	0.618172	1.03132	0.0713653
sp|P35213|1433B_RAT	14-3-3 protein beta/alpha OS=Rattus norvegicus GN=Ywhab PE=1 SV=3	30.47	76.42	16	1.04311	0.622342	31.69	63.01	16	1.07568	0.284515	34.96	72.76	18	0.975434	0.886499	1.03141	0.0511366
tr|A0A0H2UHS1|A0A0H2UHS1_RAT	RCG47431 OS=Rattus norvegicus GN=Bles03 PE=1 SV=1	6.13	35.96	4	0.99318	0.981282	3.97	30.14	2	0.714598	0	5.07	36.64	3	1.38654	0.652949	1.03144	0.337599
tr|A0A0G2KB46|A0A0G2KB46_RAT	Rho GTPase-activating protein 35 OS=Rattus norvegicus GN=Arhgap35 PE=1 SV=1	19.37	19.55	11	1.0912	0.261378	17.18	26.62	10	1.05389	0.353625	10.23	24.62	6	0.949592	0.624479	1.03156	0.0733974
tr|M0RBX6|M0RBX6_RAT	Histone H3 OS=Rattus norvegicus GN=LOC690171 PE=1 SV=1	5.84	31.62	5	1.10176	0.896692	9.14	40.44	5	1.05058	0.849503	8.86	44.85	5	0.942702	0.929803	1.03168	0.0811937
tr|G3V784|G3V784_RAT	ADP-dependent glucokinase OS=Rattus norvegicus GN=Adpgk PE=1 SV=1	11.9	31.25	6	1.14025	0.518804	16.88	33.67	10	1.04931	0.592162	15.52	39.52	8	0.905596	0.12025	1.03172	0.118312
tr|A0A0G2KAW5|A0A0G2KAW5_RAT	WD repeat domain 48 OS=Rattus norvegicus GN=Wdr48 PE=1 SV=1	9.55	21.85	5	1.21714	0.780059	7.58	30.39	4	0.82956	0.738037	7.49	27.06	4	1.04864	0.865227	1.03178	0.194337
tr|D4A781|D4A781_RAT	Importin 5 OS=Rattus norvegicus GN=Ipo5 PE=1 SV=1	33.73	29.17	16	1.01679	0.877082	42.49	30.63	20	0.946196	0.433594	45.64	31.45	23	1.13244	0.122469	1.03181	0.0940245
sp|Q6P6T4|EMAL2_RAT	Echinoderm microtubule-associated protein-like 2 OS=Rattus norvegicus GN=Eml2 PE=1 SV=1	27.68	45.15	15	1.08113	0.511935	26.26	44.07	12	1.01228	0.855328	28.61	45.76	15	1.00205	0.979723	1.03182	0.0430109
sp|Q5U2N3|PITM1_RAT	Membrane-associated phosphatidylinositol transfer protein 1 OS=Rattus norvegicus GN=Pitpnm1 PE=1 SV=1	18.21	25.68	10	1.11836	0.699208	18.26	25.44	10	1.0429	0.896287	16.27	23.75	9	0.934275	0.686837	1.03185	0.0925397
tr|B2GV74|B2GV74_RAT	Kinesin light chain 2 OS=Rattus norvegicus GN=Klc2 PE=1 SV=1	31.66	47.75	14	0.942408	0.519248	42.32	56.11	20	1.15168	0.178148	39.17	62.86	19	1.00194	0.98292	1.03201	0.107827
tr|D3ZBM3|D3ZBM3_RAT	Ferrochelatase OS=Rattus norvegicus GN=Fech PE=1 SV=1	8.02	45.97	5	0.961533	0.703591	7.24	35.55	4	1.07683	0.691061	9.01	56.4	6	1.05784	0.681009	1.03207	0.0618182
sp|Q66HF1|NDUS1_RAT	NADH-ubiquinone oxidoreductase 75 kDa subunit, mitochondrial OS=Rattus norvegicus GN=Ndufs1 PE=1 SV=1	60.56	65.34	30	1.04096	0.263828	56.23	63.82	28	1.09364	0.00960311	58.3	61.07	27	0.962405	0.456579	1.03233	0.0660398
tr|Q6GMN8|Q6GMN8_RAT	Actn1 protein OS=Rattus norvegicus GN=Actn1 PE=1 SV=1	48.61	53.55	24	1.14375	0.309712	56.88	55.02	27	1.00613	0.977961	53.65	51.52	27	0.947286	0.676362	1.03239	0.100827
sp|P56574|IDHP_RAT	Isocitrate dehydrogenase [NADP], mitochondrial OS=Rattus norvegicus GN=Idh2 PE=1 SV=2	38.3	62.83	19	1.02048	0.890594	42.12	58.19	21	1.04119	0.704652	41.6	63.05	22	1.03656	0.777507	1.03274	0.0108664
sp|Q8R424|STABP_RAT	STAM-binding protein OS=Rattus norvegicus GN=Stambp PE=2 SV=1	6.12	29.72	3	0.917656	0.925715	6.04	31.37	3	1.14942	0.848855	9.66	39.86	5	1.03172	0.949583	1.03293	0.115887
sp|P69682|NECP1_RAT	Adaptin ear-binding coat-associated protein 1 OS=Rattus norvegicus GN=Necap1 PE=1 SV=1	7.55	38.27	4	1.14559	0.33844	8.19	35.74	5	1.04869	0.483268	6.97	35.74	4	0.904545	0.17569	1.03294	0.121294
sp|P21708|MK03_RAT	Mitogen-activated protein kinase 3 OS=Rattus norvegicus GN=Mapk3 PE=1 SV=5	28.5	67.11	15	1.1838	0.0531861	36.43	57.11	18	0.942614	0.183428	39.06	58.42	20	0.972727	0.572409	1.03305	0.131421
sp|P61972|NTF2_RAT	Nuclear transport factor 2 OS=Rattus norvegicus GN=Nutf2 PE=1 SV=1	7.23	56.69	4	0.964557	0.817304	6.31	56.69	3	0.823523	0.131091	6.59	56.69	3	1.31144	0.0443977	1.03317	0.251093
tr|G3V6H5|G3V6H5_RAT	Mitochondrial 2-oxoglutarate/malate carrier protein OS=Rattus norvegicus GN=Slc25a11 PE=1 SV=1	24.23	67.52	12	1.09112	0.068663	24.05	60.51	14	1.04115	0.343757	24.73	64.65	15	0.967288	0.424582	1.03318	0.0622967
sp|Q9Z1B2|GSTM5_RAT	Glutathione S-transferase Mu 5 OS=Rattus norvegicus GN=Gstm5 PE=1 SV=3	25.38	73.78	14	1.1697	0.24161	28.25	80	15	1.00381	0.975472	26.36	67.56	13	0.926348	0.567146	1.03329	0.124327
sp|E9PU28|IMDH2_RAT	Inosine-5'-monophosphate dehydrogenase 2 OS=Rattus norvegicus GN=Impdh2 PE=1 SV=1	12.64	30.16	6	1.02696	0.687726	8.85	19.26	5	1.00341	0.965242	14.24	32.3	7	1.0695	0.492579	1.03329	0.0334961
sp|B2GV06|SCOT1_RAT	Succinyl-CoA:3-ketoacid coenzyme A transferase 1, mitochondrial OS=Rattus norvegicus GN=Oxct1 PE=1 SV=1	21.39	41.73	11	1.00505	0.928438	24.34	48.46	12	1.11348	0.221754	23.64	44.04	13	0.981546	0.907499	1.03336	0.070377
sp|P61983|1433G_RAT	14-3-3 protein gamma OS=Rattus norvegicus GN=Ywhag PE=1 SV=2	30.22	65.59	15	1.02753	0.780473	31.09	68.02	15	1.08696	0.233191	30.34	68.02	14	0.985775	0.935004	1.03342	0.05085
tr|D4ABK7|D4ABK7_RAT	Heterogeneous nuclear ribonucleoprotein H3 OS=Rattus norvegicus GN=Hnrnph3 PE=1 SV=1	4.49	17.63	2	1.08146	0.453153	7.18	28.32	4	0.934193	0.864854	6.36	32.08	4	1.08523	0.685838	1.03363	0.0861337
sp|Q6P686|OSTF1_RAT	Osteoclast-stimulating factor 1 OS=Rattus norvegicus GN=Ostf1 PE=1 SV=1	9.56	49.53	5	1.04797	0.513973	14.41	72.43	7	1.01667	0.778209	14.36	57.48	7	1.03682	0.752132	1.03382	0.0158636
sp|Q5M827|PIR_RAT	Pirin OS=Rattus norvegicus GN=Pir PE=1 SV=1	5.59	35.74	4	0.940134	0.695973	9.79	48.45	5	1.18072	0.0243777	9.06	39.18	6	0.980816	0.799018	1.03389	0.128773
sp|O35458|VIAAT_RAT	Vesicular inhibitory amino acid transporter OS=Rattus norvegicus GN=Slc32a1 PE=1 SV=1	19.49	30.29	10	1.04204	0.66593	22.61	35.24	12	1.09174	0.0876415	21.91	37.52	11	0.968156	0.63946	1.03398	0.0621862
sp|Q66HA8|HS105_RAT	Heat shock protein 105 kDa OS=Rattus norvegicus GN=Hsph1 PE=1 SV=1	58.11	51.05	28	1.11352	0.018316	70.32	55.13	36	0.962085	0.5789	72.74	58.97	35	1.02636	0.76786	1.03399	0.0760068
sp|P05708|HXK1_RAT	Hexokinase-1 OS=Rattus norvegicus GN=Hk1 PE=1 SV=4	76.31	52.51	36	1.12584	0.148897	83.32	52.83	41	1.02229	0.813506	80.35	53.38	39	0.954237	0.654828	1.03412	0.0864128
tr|F1LPK7|F1LPK7_RAT	Plastin 3 (T-isoform), isoform CRA_a OS=Rattus norvegicus GN=Pls3 PE=1 SV=2	38.65	54.92	20	0.998064	0.990819	41.7	46.98	21	1.06597	0.588116	41.07	47.94	20	1.03836	0.717994	1.03413	0.0341522
sp|O08700|VPS45_RAT	Vacuolar protein sorting-associated protein 45 OS=Rattus norvegicus GN=Vps45 PE=1 SV=1	12.73	39.47	6	1.16368	0.5321	11.19	40.35	7	1.01499	0.908562	9.1	25.09	5	0.923951	0.566542	1.03421	0.121015
sp|Q6AYD3|PA2G4_RAT	Proliferation-associated protein 2G4 OS=Rattus norvegicus GN=Pa2g4 PE=1 SV=1	23.75	71.07	13	1.10195	0.153863	20.73	50	10	0.879682	0.548508	21.68	61.17	10	1.12114	0.0569509	1.03426	0.134209
tr|E9PU42|E9PU42_RAT	DSCR3 arrestin fold-containing OS=Rattus norvegicus GN=Dscr3 PE=1 SV=2	3.54	34.01	3	0.846882	0.663742	5.08	39.39	3	0.943028	0.891768	8.17	26.26	4	1.31301	0.252484	1.03431	0.246107
sp|Q5EB77|RAB18_RAT	Ras-related protein Rab-18 OS=Rattus norvegicus GN=Rab18 PE=2 SV=1	21.15	53.88	11	1.04071	0.608318	21.15	62.14	11	0.977347	0.79768	20.75	58.25	11	1.08533	0.507917	1.03446	0.0542619
sp|P85845|FSCN1_RAT	Fascin OS=Rattus norvegicus GN=Fscn1 PE=1 SV=2	25.82	54.16	12	1.14968	0.33248	33.43	58.01	17	0.878483	0.215841	33.78	60.65	17	1.07584	0.304302	1.03467	0.140207
sp|P19627|GNAZ_RAT	Guanine nucleotide-binding protein G(z) subunit alpha OS=Rattus norvegicus GN=Gnaz PE=2 SV=3	11.11	36.34	6	1.08343	0.457516	16.78	56.34	9	1.02382	0.892442	15.45	39.44	8	0.996764	0.987537	1.03467	0.04434
sp|P86182|CCD22_RAT	Coiled-coil domain-containing protein 22 OS=Rattus norvegicus GN=Ccdc22 PE=1 SV=2	11.94	43.38	6	1.05085	0.816188	23.11	48.33	11	1.06534	0.524211	16.52	46.89	8	0.988038	0.905656	1.03474	0.0410903
tr|F1LPF2|F1LPF2_RAT	Agrin OS=Rattus norvegicus GN=Agrn PE=1 SV=3	8.52	17.52	6	1.1318	0.68242	15.72	18.39	8	0.821501	0.38626	11.91	12.52	6	1.15122	0.3943	1.03484	0.185014
tr|M3ZCQ2|M3ZCQ2_RAT	U5 small nuclear ribonucleoprotein 200 kDa helicase OS=Rattus norvegicus GN=Snrnp200 PE=1 SV=1	12.14	19.15	7	1.19306	0.159628	7.87	20.69	5	0.947972	0.809854	9.18	22.1	8	0.96393	0.705292	1.03499	0.137125
sp|O08557|DDAH1_RAT	N(G),N(G)-dimethylarginine dimethylaminohydrolase 1 OS=Rattus norvegicus GN=Ddah1 PE=1 SV=3	18.05	63.51	9	0.98593	0.837554	20.09	49.82	10	1.0216	0.899449	22.08	55.79	11	1.09746	0.391684	1.035	0.0569602
tr|Q6IMZ3|Q6IMZ3_RAT	Annexin OS=Rattus norvegicus GN=Anxa6 PE=1 SV=1	86.89	77.71	42	0.979548	0.76285	96.7	79.35	48	1.02624	0.62567	95.18	74.15	47	1.0993	0.0380687	1.03503	0.0603564
sp|P13084|NPM_RAT	Nucleophosmin OS=Rattus norvegicus GN=Npm1 PE=1 SV=1	10.34	39.04	5	0.888519	0.470723	10.9	54.45	5	1.05146	0.612915	9.52	49.66	4	1.16544	0.390636	1.03514	0.139181
sp|Q02563|SV2A_RAT	Synaptic vesicle glycoprotein 2A OS=Rattus norvegicus GN=Sv2a PE=1 SV=2	20.4	17.65	10	1.07013	0.247481	21.02	23.45	10	1.08241	0.544069	20.77	19.81	10	0.953016	0.711133	1.03519	0.0714275
sp|Q5BK81|PTGR2_RAT	Prostaglandin reductase 2 OS=Rattus norvegicus GN=Ptgr2 PE=2 SV=2	14.87	38.75	9	1.02357	0.753776	17.78	39.89	10	1.13508	0.0414376	16.6	38.18	10	0.947034	0.507763	1.03523	0.0945617
tr|D4A732|D4A732_RAT	Multivesicular body subunit 12B OS=Rattus norvegicus GN=Mvb12b PE=4 SV=2	3.18	23.97	2	1.09079	0.75106	6.57	25.87	4	0.981779	0.813893	8.4	29.02	4	1.0332	0.942739	1.03525	0.0545333
sp|Q792I0|LIN7C_RAT	Protein lin-7 homolog C OS=Rattus norvegicus GN=Lin7c PE=1 SV=1	10.62	67.51	6	1.04643	0.654357	10.33	70.05	6	1.04856	0.742025	10.28	57.36	5	1.01099	0.950443	1.03533	0.0211049
sp|P63018|HSP7C_RAT	Heat shock cognate 71 kDa protein OS=Rattus norvegicus GN=Hspa8 PE=1 SV=1	77.24	64.86	41	1.11005	0.20499	84.49	72.76	44	0.994108	0.91796	83.04	66.56	42	1.00201	0.98007	1.03539	0.0647797
tr|A1L1J4|A1L1J4_RAT	Protein phosphatase 2C, magnesium dependent, catalytic subunit OS=Rattus norvegicus GN=Pdp1 PE=1 SV=1	8.96	22.86	5	0.953328	0.884612	7	30.11	4	1.06739	0.50299	9.41	28.07	5	1.08545	0.854248	1.03539	0.0716393
tr|A0A0G2K9Q7|A0A0G2K9Q7_RAT	Microtubule-associated protein 1 light chain 3 beta 2 OS=Rattus norvegicus GN=Map1lc3b2 PE=3 SV=1	5.17	37.6	3	1.03211	0.74493	6	37.6	4	1.07097	0.460983	6.32	40	3	1.00314	0.979567	1.03541	0.0340341
tr|A0A0H2UHE1|A0A0H2UHE1_RAT	Succinate--CoA ligase [ADP/GDP-forming] subunit alpha, mitochondrial OS=Rattus norvegicus GN=Suclg1 PE=1 SV=1	12.28	31.39	6	1.03718	0.593242	11.26	25.56	7	1.10762	0.406653	13.11	21.94	7	0.961431	0.566489	1.03541	0.0731096
sp|P62198|PRS8_RAT	26S proteasome regulatory subunit 8 OS=Rattus norvegicus GN=Psmc5 PE=1 SV=1	21.96	54.93	10	1.08902	0.397839	18.96	51.23	9	0.990393	0.919188	19.93	54.68	10	1.02735	0.848119	1.03559	0.0498241
sp|Q06647|ATPO_RAT	ATP synthase subunit O, mitochondrial OS=Rattus norvegicus GN=Atp5o PE=1 SV=1	25.15	83.1	14	1.09699	0.109169	26.69	80.75	15	1.05793	0.794029	25.59	84.51	13	0.95199	0.615758	1.03564	0.0750265
sp|P34926|MAP1A_RAT	Microtubule-associated protein 1A OS=Rattus norvegicus GN=Map1a PE=1 SV=1	172.1	55.88	96	1.08374	0.120575	174.71	53.06	100	1.01902	0.683029	174.55	57.53	99	1.00579	0.90286	1.03619	0.0417143
tr|D3ZP47|D3ZP47_RAT	Phosphohistidine phosphatase 1 OS=Rattus norvegicus GN=Phpt1 PE=1 SV=1	4.88	44.35	3	1.13371	0.261539	4.77	55.65	3	1.07967	0.36026	6.69	41.13	4	0.895608	0.517563	1.03633	0.12483
sp|Q64240|AMBP_RAT	Protein AMBP OS=Rattus norvegicus GN=Ambp PE=1 SV=1	6	20.63	3	0.807957	0.129342	6.74	34.38	4	0.848552	0.26628	9.52	24.93	5	1.4529	0.208042	1.03647	0.36121
sp|B5DEH2|ERLN2_RAT	Erlin-2 OS=Rattus norvegicus GN=Erlin2 PE=1 SV=1	14.17	43.07	7	1.07828	0.8681	10.38	38.35	6	1.07779	0.812556	17.81	44.54	9	0.954134	0.965859	1.03673	0.0715337
tr|B0K014|B0K014_RAT	D-aminoacyl-tRNA deacylase OS=Rattus norvegicus GN=Dtd1 PE=1 SV=1	4.41	41.15	2	1.01491	0.905505	4.67	34.93	3	1.03138	0.807322	4.37	40.67	2	1.064	0.651817	1.03676	0.0249829
sp|P19945|RLA0_RAT	60S acidic ribosomal protein P0 OS=Rattus norvegicus GN=Rplp0 PE=1 SV=2	17.79	40.38	9	1.0701	0.6365	17.85	41.64	10	0.941694	0.750484	19.03	40.38	10	1.09852	0.373738	1.03677	0.0835563
sp|Q6AYR2|NDRG3_RAT	Protein NDRG3 OS=Rattus norvegicus GN=Ndrg3 PE=1 SV=1	13.22	47.73	7	1.04106	0.745121	14.52	40.53	7	1.04984	0.675532	17.6	34.4	9	1.01978	0.87648	1.03689	0.0154564
tr|D4A719|D4A719_RAT	Sorting nexin 12 OS=Rattus norvegicus GN=Snx12 PE=1 SV=1	9.68	57.06	5	1.03801	0.888569	9.53	57.06	5	0.881198	0.437622	10.34	44.71	6	1.19177	0.111608	1.03699	0.155288
tr|A0A0G2K6H2|A0A0G2K6H2_RAT	Maleylacetoacetate isomerase OS=Rattus norvegicus GN=Gstz1 PE=1 SV=1	9.4	39.53	5	1.0876	0.308513	10.24	43.26	5	1.19944	0.050101	10.12	39.53	5	0.823985	0.0876093	1.03701	0.192772
tr|B2RYN3|B2RYN3_RAT	Eukaryotic translation elongation factor 1 epsilon 1 OS=Rattus norvegicus GN=Eef1e1 PE=1 SV=1	4.01	29.89	2	0.86302	0.305556	6.74	55.17	4	1.00636	0.95667	4.23	38.51	2	1.24207	0.118613	1.03715	0.191391
tr|A0A0G2JWL3|A0A0G2JWL3_RAT	Neurofibromin OS=Rattus norvegicus GN=Nf1 PE=1 SV=1	15.63	18.18	10	0.958771	0.869985	6.54	19.4	6	1.31661	0.419495	9.08	17.06	8	0.836207	0.164632	1.0372	0.249618
tr|A0A0G2KAM3|A0A0G2KAM3_RAT	Pyruvate dehydrogenase E1 component subunit beta, mitochondrial OS=Rattus norvegicus GN=Pdhb PE=1 SV=1	32.18	45.39	16	1.06332	0.141976	30.95	45.15	16	1.05571	0.336818	28.99	46.1	18	0.993129	0.868974	1.03739	0.0385168
sp|P63041|CPLX1_RAT	Complexin-1 OS=Rattus norvegicus GN=Cplx1 PE=1 SV=1	8.81	76.87	5	1.16774	0.335401	8.08	71.64	4	0.993116	0.960691	8.21	59.7	4	0.951763	0.650656	1.03754	0.114638
tr|G3V9Z3|G3V9Z3_RAT	Amine oxidase OS=Rattus norvegicus GN=Maoa PE=1 SV=1	31.2	51.33	16	1.05016	0.755327	32.21	52.09	16	1.0867	0.278493	31.98	52.85	16	0.976048	0.856753	1.03763	0.0563773
sp|Q68FX9|SIR5_RAT	NAD-dependent protein deacylase sirtuin-5, mitochondrial OS=Rattus norvegicus GN=Sirt5 PE=2 SV=1	14.59	33.23	8	1.06314	0.379248	16.53	42.58	8	1.02212	0.773839	14.32	32.58	7	1.02765	0.797621	1.03763	0.0222565
sp|O35264|PA1B2_RAT	Platelet-activating factor acetylhydrolase IB subunit beta OS=Rattus norvegicus GN=Pafah1b2 PE=1 SV=1	5.23	22.27	3	1.02981	0.743062	4.73	24.89	3	1.09752	0.340193	5.69	31	4	0.986089	0.90745	1.03781	0.0561454
sp|B2RYW9|FAHD2_RAT	Fumarylacetoacetate hydrolase domain-containing protein 2 OS=Rattus norvegicus GN=Fahd2 PE=1 SV=1	17.28	41.53	10	1.07162	0.359953	17.47	40.26	9	1.03945	0.506298	18.85	40.26	9	1.00237	0.978527	1.03782	0.034653
tr|A0A0G2JSM8|A0A0G2JSM8_RAT	Cell division control protein 42 homolog OS=Rattus norvegicus GN=Cdc42 PE=1 SV=1	12.65	47.12	8	1.09515	0.527384	17.79	54.97	9	1.03874	0.769811	16.23	52.88	8	0.979784	0.871124	1.03789	0.0576865
tr|D3ZH41|D3ZH41_RAT	Cytoskeleton-associated protein 4 OS=Rattus norvegicus GN=Ckap4 PE=1 SV=2	13.86	58.28	7	1.01703	0.897076	12.46	44.48	6	0.999143	0.99346	11.75	49.39	7	1.09756	0.301206	1.03791	0.0524238
tr|B5DFC3|B5DFC3_RAT	SEC23A (S. cerevisiae) (Predicted) OS=Rattus norvegicus GN=Sec23a PE=1 SV=1	27.25	27.84	15	1.03174	0.715997	27.06	31.9	13	0.963394	0.60287	27.06	34.38	13	1.11874	0.28362	1.03796	0.0778585
sp|P0C5X8|TTYH1_RAT	Protein tweety homolog 1 OS=Rattus norvegicus GN=Ttyh1 PE=1 SV=1	6.43	16.89	3	1.03883	0.896611	6.56	14.44	4	1.14385	0.432323	6.01	15.78	3	0.932194	0.520877	1.03829	0.105829
tr|F1LRB8|F1LRB8_RAT	S-adenosylmethionine synthase OS=Rattus norvegicus GN=Mat2a PE=1 SV=2	10.18	46.08	6	1.02679	0.766382	14.02	47.85	8	1.12001	0.0459415	13.4	42.03	7	0.968587	0.915427	1.03846	0.0763827
tr|Q7TPI7|Q7TPI7_RAT	Ac2-269 OS=Rattus norvegicus GN=LOC100911453 PE=1 SV=1	6.53	30.75	4	1.0913	0.313637	9.66	32.47	5	0.866176	0.25627	8.24	36.21	4	1.15831	0.193241	1.03859	0.153031
tr|D3ZZ99|D3ZZ99_RAT	Alpha-adducin OS=Rattus norvegicus GN=Add1 PE=1 SV=3	43.38	54.28	23	1.10151	0.510063	40.14	51.33	19	0.992888	0.968827	51.56	51.03	24	1.0215	0.896341	1.03863	0.0562987
tr|R9PXU6|R9PXU6_RAT	Vinculin OS=Rattus norvegicus GN=Vcl PE=1 SV=1	85.06	72.14	41	0.961001	0.287004	86.74	69.89	43	0.989872	0.915115	82.55	73.64	40	1.16503	0.110554	1.03863	0.11041
tr|Q9JI56|Q9JI56_RAT	SNAP-29 protein OS=Rattus norvegicus GN=Snap29 PE=1 SV=1	8.02	47.86	5	0.96773	0.725994	11.08	55.25	5	1.00344	0.965629	11.59	53.31	6	1.14567	0.530644	1.03895	0.0941349
tr|D3ZH59|D3ZH59_RAT	Adhesion G protein-coupled receptor L3 OS=Rattus norvegicus GN=Adgrl3 PE=1 SV=3	8.56	21.2	7	1.14965	0.522462	13.01	25.5	7	0.932406	0.792543	6.51	17.05	5	1.03526	0.82748	1.03911	0.108671
sp|F1LU71|AUHM_RAT	Methylglutaconyl-CoA hydratase, mitochondrial OS=Rattus norvegicus GN=Auh PE=1 SV=2	23.91	57.14	13	1.07425	0.431828	22.74	61.27	11	1.07882	0.227756	23.45	55.56	13	0.964369	0.623918	1.03915	0.0648002
sp|P01015|ANGT_RAT	Angiotensinogen OS=Rattus norvegicus GN=Agt PE=1 SV=1	9.83	22.43	5	0.988972	0.948767	10.64	22.43	5	1.05853	0.741812	11.23	26	6	1.07043	0.578667	1.03931	0.0439982
sp|P63025|VAMP3_RAT	Vesicle-associated membrane protein 3 OS=Rattus norvegicus GN=Vamp3 PE=1 SV=1	11.03	54.37	6	1.10405	0.714629	11.35	51.46	6	0.915999	0.545197	10.09	51.46	5	1.09801	0.543094	1.03935	0.10687
sp|Q08163|CAP1_RAT	Adenylyl cyclase-associated protein 1 OS=Rattus norvegicus GN=Cap1 PE=1 SV=3	38.35	55.49	19	1.03944	0.571478	42.24	56.54	20	0.960111	0.497279	40.94	62.45	19	1.11859	0.242367	1.03938	0.0792391
tr|G3V836|G3V836_RAT	Clusterin OS=Rattus norvegicus GN=Clu PE=1 SV=1	22.52	46.98	11	0.965584	0.774482	19.29	48.99	10	0.825149	0.301943	18.5	45.64	9	1.32744	0.120257	1.03939	0.259153
sp|O35077|GPDA_RAT	Glycerol-3-phosphate dehydrogenase [NAD(+)], cytoplasmic OS=Rattus norvegicus GN=Gpd1 PE=1 SV=4	38.37	67.05	19	1.01447	0.84256	32.03	55.59	18	1.08329	0.422233	34.08	63.32	17	1.02095	0.8638	1.03957	0.0379998
tr|A0A0G2JZI2|A0A0G2JZI2_RAT	Glutamyl-prolyl-tRNA synthetase OS=Rattus norvegicus GN=Eprs PE=1 SV=1	58.31	44.38	28	1.07102	0.356311	64.23	55.82	32	0.968647	0.651643	71.62	50.07	35	1.07955	0.0928308	1.03974	0.0617146
tr|A0A0G2JX74|A0A0G2JX74_RAT	Serine/threonine-protein kinase mTOR OS=Rattus norvegicus GN=Mtor PE=1 SV=1	12.45	17.6	8	0.932229	0.561184	12.16	21.81	9	0.946022	0.61157	10.89	18.07	9	1.24131	0.576739	1.03985	0.1746
sp|Q62639|RHEB_RAT	GTP-binding protein Rheb OS=Rattus norvegicus GN=Rheb PE=1 SV=1	5.46	34.24	3	1.10412	0.351779	5.41	36.41	3	0.985916	0.839044	4.3	38.59	2	1.03035	0.868577	1.04013	0.0597073
tr|D3Z9Z0|D3Z9Z0_RAT	Ankyrin 1 OS=Rattus norvegicus GN=Ank1 PE=1 SV=1	46.92	35.68	23	1.08164	0.763921	53.22	43.82	28	1.0818	0.722657	57.93	38.02	30	0.957173	0.83653	1.0402	0.0719063
sp|P19139|CSK21_RAT	Casein kinase II subunit alpha OS=Rattus norvegicus GN=Csnk2a1 PE=1 SV=2	11.79	47.57	6	1.03511	0.806385	12.46	48.59	6	1.13453	0.069636	14.25	43.73	7	0.951575	0.878111	1.0404	0.0915916
sp|Q68FS2|CSN4_RAT	COP9 signalosome complex subunit 4 OS=Rattus norvegicus GN=Cops4 PE=1 SV=1	35.03	74.14	17	1.14456	0.0999902	36.45	77.09	18	0.945429	0.570751	34.58	82.02	16	1.03181	0.660095	1.0406	0.0998566
sp|P70566|TMOD2_RAT	Tropomodulin-2 OS=Rattus norvegicus GN=Tmod2 PE=1 SV=1	17.4	58.69	9	0.949845	0.802798	17.48	47.29	8	1.13748	0.21364	20.21	59.54	10	1.03463	0.75035	1.04065	0.0939641
tr|B5DF95|B5DF95_RAT	Family with sequence similarity 164, member A OS=Rattus norvegicus GN=Zc2hc1a PE=1 SV=1	7.45	36.73	4	0.790023	0.546674	5.12	41.98	3	1.13516	0.506031	5.34	38.27	3	1.19692	0.343151	1.0407	0.21928
tr|G3V851|G3V851_RAT	Solute carrier family 17 (Sodium-dependent inorganic phosphate cotransporter), member 6 OS=Rattus norvegicus GN=Slc17a6 PE=4 SV=1	9.63	29.55	5	1.13266	0.284997	10.92	21.65	6	1.03294	0.798558	9.94	22.51	5	0.956544	0.816845	1.04071	0.0883162
sp|Q6P6R2|DLDH_RAT	Dihydrolipoyl dehydrogenase, mitochondrial OS=Rattus norvegicus GN=Dld PE=1 SV=1	39.08	47.54	20	1.077	0.333984	39.1	42.63	21	1.07177	0.318563	37.65	57.37	19	0.973388	0.595966	1.04072	0.0583702
sp|O35112|CD166_RAT	CD166 antigen OS=Rattus norvegicus GN=Alcam PE=1 SV=1	25.62	30.7	13	1.0298	0.847211	28.93	31.56	14	0.968058	0.709784	29.86	34.48	15	1.12496	0.244615	1.04094	0.0790442
tr|G3V6D3|G3V6D3_RAT	ATP synthase subunit beta OS=Rattus norvegicus GN=Atp5b PE=1 SV=1	40.74	63.33	24	1.05615	0.474522	45.16	64.46	25	1.05418	0.293189	43.43	67.86	24	1.0127	0.827964	1.04101	0.0245389
sp|Q5BK63|NDUA9_RAT	NADH dehydrogenase [ubiquinone] 1 alpha subcomplex subunit 9, mitochondrial OS=Rattus norvegicus GN=Ndufa9 PE=1 SV=2	25.84	53.58	13	1.06383	0.268117	22.73	41.11	12	1.10234	0.0654502	18.62	41.64	9	0.957248	0.489684	1.04114	0.0751596
tr|G3V792|G3V792_RAT	Cytoplasmic dynein 1 intermediate chain 1 OS=Rattus norvegicus GN=Dync1i1 PE=1 SV=3	19.9	31.73	11	1.0936	0.585625	28.43	43.7	15	1.02427	0.896428	18.08	37.01	9	1.00581	0.972033	1.04122	0.0462846
tr|A0A0G2JSZ1|A0A0G2JSZ1_RAT	Ras-related protein Rab-31 OS=Rattus norvegicus GN=Rab31 PE=4 SV=1	6	23.59	3	0.943192	0	6.21	50.77	4	1.15842	0	8.18	43.59	4	1.02284	0.940893	1.04148	0.108818
sp|Q6Q0N1|CNDP2_RAT	Cytosolic non-specific dipeptidase OS=Rattus norvegicus GN=Cndp2 PE=1 SV=1	36.68	56.84	19	1.05324	0.500025	41.7	63.16	22	0.974059	0.69237	40.07	58.11	22	1.09735	0.145667	1.04155	0.0624713
sp|Q68FY0|QCR1_RAT	Cytochrome b-c1 complex subunit 1, mitochondrial OS=Rattus norvegicus GN=Uqcrc1 PE=1 SV=1	30.09	46.04	15	1.05983	0.30132	31.4	47.92	15	1.03384	0.628541	30.32	46.46	15	1.03102	0.664116	1.04156	0.0158819
sp|O35303|DNM1L_RAT	Dynamin-1-like protein OS=Rattus norvegicus GN=Dnm1l PE=1 SV=1	62.14	63.71	30	1.04956	0.318521	50.92	56.95	26	1.11184	0.23284	55.39	56.95	28	0.963548	0.614202	1.04165	0.0744632
tr|A0A0G2JSQ1|A0A0G2JSQ1_RAT	Beta-synuclein OS=Rattus norvegicus GN=Sncb PE=1 SV=1	29.33	64.18	15	1.08174	0.370042	28	64.18	15	1.06727	0.377329	26.81	56.72	14	0.975979	0.84785	1.04166	0.0573425
sp|Q6AYN4|PHIPL_RAT	Phytanoyl-CoA hydroxylase-interacting protein-like OS=Rattus norvegicus GN=Phyhipl PE=1 SV=2	24.34	52.53	12	1.1016	0.520841	26.82	53.6	13	1.03212	0.78477	23.9	56.53	11	0.991391	0.952601	1.04171	0.0557274
tr|A0A0G2JY03|A0A0G2JY03_RAT	Uncharacterized protein OS=Rattus norvegicus PE=1 SV=1	11.14	52.92	5	1.17111	0.399758	10.98	48.64	6	0.949006	0.895357	9.23	54.47	6	1.00519	0.957174	1.04177	0.11548
tr|M0R3V7|M0R3V7_RAT	Sodium/calcium exchanger 1 OS=Rattus norvegicus GN=Slc8a1 PE=3 SV=2	4.21	14.4	4	1.37425	0.0606028	6.57	17.31	4	0.751363	0.271882	5.66	17.82	3	0.999705	0.999268	1.04177	0.313565
sp|Q6AYE2|SHLB1_RAT	Endophilin-B1 OS=Rattus norvegicus GN=Sh3glb1 PE=2 SV=1	16.7	42.74	9	1.31519	0.205034	16.45	44.11	9	0.896213	0.210285	15.66	45.75	8	0.914087	0.500443	1.04183	0.236903
sp|O08678|MARK1_RAT	Serine/threonine-protein kinase MARK1 OS=Rattus norvegicus GN=Mark1 PE=1 SV=1	10.49	38.59	6	1.24494	0.327233	8.03	38.59	4	0.893694	0	17.9	43.63	10	0.987039	0.927875	1.04189	0.181933
tr|B2RYS2|B2RYS2_RAT	Cytochrome b-c1 complex subunit 7 OS=Rattus norvegicus GN=Uqcrb PE=1 SV=1	13.94	68.47	8	0.904763	0.325572	14.18	81.08	7	1.16065	0.280555	15.1	75.68	8	1.06029	0.817659	1.0419	0.128931
tr|D4AC36|D4AC36_RAT	Eukaryotic translation initiation factor 3 subunit F OS=Rattus norvegicus GN=Eif3f PE=1 SV=3	11.96	24.93	6	0.948573	0.48049	10.16	29.92	5	0.983135	0.855223	12.75	28.25	6	1.19409	0.328689	1.04193	0.132901
tr|A0A0G2K3K2|A0A0G2K3K2_RAT	Actin, cytoplasmic 1 OS=Rattus norvegicus GN=Actb PE=1 SV=1	57.36	72.49	33	1.08376	0.592051	62.57	78.04	38	0.927654	0.530455	63.03	73.81	38	1.11446	0.298462	1.04196	0.100172
sp|O88506|STK39_RAT	STE20/SPS1-related proline-alanine-rich protein kinase OS=Rattus norvegicus GN=Stk39 PE=1 SV=2	19.41	45.39	10	1.08462	0.258776	18.3	33.09	9	1.00795	0.950018	19.43	33.27	11	1.03333	0.708848	1.04197	0.0390602
tr|D4AA63|D4AA63_RAT	Ubiquilin 2 OS=Rattus norvegicus GN=Ubqln2 PE=1 SV=1	19.09	20.38	10	1.04162	0.740166	21.07	23.51	11	1.08004	0.465497	20.54	17.87	11	1.0043	0.965706	1.04198	0.0378703
sp|Q9ES21|SAC1_RAT	Phosphatidylinositide phosphatase SAC1 OS=Rattus norvegicus GN=Sacm1l PE=1 SV=1	38.72	44.12	17	1.10432	0.372325	37.46	45.83	18	0.983198	0.757918	37.63	48.72	18	1.03954	0.490438	1.04235	0.0606075
sp|Q03626|MUG1_RAT	Murinoglobulin-1 OS=Rattus norvegicus GN=Mug1 PE=2 SV=1	59.35	32.95	31	0.946809	0.637032	62.19	37.93	33	0.927931	0.247205	54.02	34.43	28	1.25241	0.0536922	1.04238	0.182132
sp|A1A5P0|BORG5_RAT	Cdc42 effector protein 1 OS=Rattus norvegicus GN=Cdc42ep1 PE=1 SV=1	7.61	34.54	4	0.988569	0.853385	12.97	33.25	7	1.12766	0.41263	14	31.19	7	1.01099	0.933939	1.04241	0.0746796
sp|Q6PDU7|ATP5L_RAT	ATP synthase subunit g, mitochondrial OS=Rattus norvegicus GN=Atp5l PE=1 SV=2	6.31	89.32	3	1.45835	0.792962	6.6	89.32	3	0.839638	0.85839	7.08	66.02	4	0.829426	0.787667	1.04247	0.360199
tr|Q5U2R9|Q5U2R9_RAT	Sec1 family domain-containing 2 OS=Rattus norvegicus GN=Scfd2 PE=1 SV=1	7.92	19.01	4	1.18284	0.755532	6.86	23.98	4	0.737297	0.743251	6.13	23.83	3	1.20803	0.153027	1.04272	0.264804
sp|P52555|ERP29_RAT	Endoplasmic reticulum resident protein 29 OS=Rattus norvegicus GN=Erp29 PE=1 SV=2	14.9	43.46	8	1.10136	0.142483	16.52	45	8	0.920341	0.641529	16.25	50.38	8	1.10657	0.501333	1.04276	0.106048
sp|B0K020|CISD1_RAT	CDGSH iron-sulfur domain-containing protein 1 OS=Rattus norvegicus GN=Cisd1 PE=3 SV=1	11.11	52.78	6	1.08329	0.365255	10	62.96	5	1.07888	0.34647	10.02	42.59	5	0.966137	0.633426	1.04277	0.0663998
tr|E9PU13|E9PU13_RAT	Sorting nexin 4 OS=Rattus norvegicus GN=Snx4 PE=1 SV=1	8.22	41.56	4	1.16345	0.225045	8.18	24.22	4	1.03967	0.693696	9.05	33.33	5	0.92532	0.57012	1.04281	0.119095
sp|Q02974|KHK_RAT	Ketohexokinase OS=Rattus norvegicus GN=Khk PE=1 SV=1	4.45	29.87	2	0.760458	0.320239	4.02	19.13	2	1.17747	0.408553	4.01	13.09	2	1.19121	0.339146	1.04305	0.244825
sp|P09606|GLNA_RAT	Glutamine synthetase OS=Rattus norvegicus GN=Glul PE=1 SV=3	37.37	53.08	18	1.09404	0.0512653	38.8	57.64	22	1.05558	0.247058	37.72	60.59	22	0.980301	0.743998	1.04331	0.0578547
tr|O88321|O88321_RAT	Antisecretory factor OS=Rattus norvegicus GN=Psmd4 PE=1 SV=1	9.57	27.63	5	1.04989	0.539035	9.36	30.79	5	1.04183	0.765057	9.56	25.79	5	1.03985	0.776948	1.04386	0.00531593
tr|G3V8D5|G3V8D5_RAT	6-phosphogluconolactonase OS=Rattus norvegicus GN=Pgls PE=1 SV=1	13.68	41.58	7	1.05443	0.408402	13.26	42.61	7	1.0024	0.968884	11.66	43.99	7	1.0751	0.246215	1.04398	0.0374606
sp|P18420|PSA1_RAT	Proteasome subunit alpha type-1 OS=Rattus norvegicus GN=Psma1 PE=1 SV=2	17.37	60.46	8	1.0246	0.853751	19.95	53.99	10	1.03698	0.704531	21.59	55.89	11	1.0708	0.598036	1.04413	0.0239159
sp|Q5XI78|ODO1_RAT	2-oxoglutarate dehydrogenase, mitochondrial OS=Rattus norvegicus GN=Ogdh PE=1 SV=1	67.99	50.05	33	1.09684	0.423074	77.37	50.93	39	1.05747	0.545119	73.48	52.69	34	0.978076	0.842472	1.04413	0.0604941
tr|D3ZF54|D3ZF54_RAT	Anoctamin OS=Rattus norvegicus GN=Ano10 PE=1 SV=2	2.78	20.2	2	0.892588	0.746033	10.64	19.62	6	1.08487	0.677328	7.18	18.6	4	1.15537	0.647622	1.04428	0.136014
sp|Q6PEC1|TBCA_RAT	Tubulin-specific chaperone A OS=Rattus norvegicus GN=Tbca PE=1 SV=1	10.14	74.07	6	0.998975	0.98945	14.41	62.96	8	1.06484	0.428683	14.38	65.74	7	1.06963	0.404335	1.04448	0.0394823
sp|Q63259|PTPRN_RAT	Receptor-type tyrosine-protein phosphatase-like N OS=Rattus norvegicus GN=Ptprn PE=1 SV=2	9.28	22.69	5	0.948208	0.515692	8.39	20.14	5	0.957191	0.780065	9.31	14.24	5	1.22854	0.107582	1.04465	0.159322
tr|D4A9L2|D4A9L2_RAT	RCG34610, isoform CRA_c OS=Rattus norvegicus GN=Srsf1 PE=1 SV=1	15.24	64.11	9	0.912599	0.636412	16.29	63.31	8	1.08083	0.478864	13.17	65.32	7	1.14052	0.347028	1.04465	0.118189
sp|Q5XIT1|MARE3_RAT	Microtubule-associated protein RP/EB family member 3 OS=Rattus norvegicus GN=Mapre3 PE=1 SV=1	20.59	50.53	13	1.01354	0.892712	25.83	59.79	14	1.08941	0.439362	27.03	54.09	13	1.03164	0.728703	1.04486	0.0396256
tr|A0A140TA99|A0A140TA99_RAT	Elongin-B OS=Rattus norvegicus GN=Elob PE=1 SV=1	6.9	62.39	5	0.998235	0.974357	11.59	62.39	6	1.04959	0.60867	6.54	62.39	5	1.08791	0.502259	1.04524	0.044993
sp|Q5PPL3|NSDHL_RAT	Sterol-4-alpha-carboxylate 3-dehydrogenase, decarboxylating OS=Rattus norvegicus GN=Nsdhl PE=2 SV=1	9.25	35.08	4	1.18495	0.336486	12.27	36.19	6	1.05969	0.636612	8.71	38.4	4	0.89123	0.220656	1.04529	0.147391
tr|D4A8T3|D4A8T3_RAT	Coatomer protein complex, subunit zeta 1 OS=Rattus norvegicus GN=Copz1 PE=1 SV=1	6.02	29.94	3	0.763591	0.468929	5.85	31.07	3	1.09858	0.628506	5.77	36.16	3	1.27403	0.240674	1.0454	0.259344
sp|P13803|ETFA_RAT	Electron transfer flavoprotein subunit alpha, mitochondrial OS=Rattus norvegicus GN=Etfa PE=1 SV=4	29.27	58.56	15	1.04349	0.34225	28.19	64.56	15	1.12502	0.173802	26.24	69.07	13	0.96772	0.75584	1.04541	0.0786683
sp|P04762|CATA_RAT	Catalase OS=Rattus norvegicus GN=Cat PE=1 SV=3	34	49.53	17	1.05048	0.324349	32.26	50.28	16	1.04081	0.531384	36.99	56.17	19	1.04504	0.582081	1.04544	0.00484865
tr|D3ZMS1|D3ZMS1_RAT	Splicing factor 3b, subunit 2 OS=Rattus norvegicus GN=Sf3b2 PE=1 SV=3	4.56	15.95	3	0.757877	0.695431	6.82	25.74	5	1.19814	0.154739	6.07	22.32	4	1.18031	0.190181	1.04544	0.249197
tr|Q6AZ35|Q6AZ35_RAT	Cytoplasmic dynein 1 intermediate chain 2 OS=Rattus norvegicus GN=Dync1i2 PE=1 SV=1	18.1	23.73	9	1.02995	0.823244	20.45	42.88	10	1.01355	0.93168	18.47	36.71	9	1.09285	0.106401	1.04545	0.0418633
sp|P08753|GNAI3_RAT	Guanine nucleotide-binding protein G(k) subunit alpha OS=Rattus norvegicus GN=Gnai3 PE=1 SV=3	19.49	46.89	9	1.03612	0.66073	15.66	38.7	7	1.03346	0.78584	13.43	46.05	7	1.06705	0.526216	1.04554	0.0186728
sp|B0BNA5|COTL1_RAT	Coactosin-like protein OS=Rattus norvegicus GN=Cotl1 PE=1 SV=1	17.03	80.99	8	0.983467	0.787581	17.53	71.83	9	0.957131	0.606468	19.23	74.65	11	1.19633	0.0592887	1.04564	0.131162
tr|A0A096MKH2|A0A096MKH2_RAT	Similar to RIKEN cDNA 1110059P08 OS=Rattus norvegicus GN=Vta1 PE=1 SV=1	5.46	33.01	4	1.13731	0.316277	8.08	37.86	4	0.977712	0.889989	6.71	36.89	3	1.02196	0.759061	1.04566	0.0823988
sp|Q9JHB5|TSNAX_RAT	Translin-associated protein X OS=Rattus norvegicus GN=Tsnax PE=1 SV=1	7.08	38.62	4	1.04812	0.871119	15.24	55.17	8	0.927064	0.714885	12.76	64.14	7	1.16186	0.405851	1.04568	0.117416
sp|Q5XI22|THIC_RAT	Acetyl-CoA acetyltransferase, cytosolic OS=Rattus norvegicus GN=Acat2 PE=1 SV=1	22.56	48.36	12	1.19653	0.165644	24.21	46.6	13	0.936481	0.585711	21.02	46.6	11	1.00411	0.969241	1.04571	0.134923
tr|B2RYP0|B2RYP0_RAT	Ras homolog family member C OS=Rattus norvegicus GN=Rhoc PE=1 SV=1	14.03	40.41	7	1.31644	0	16	74.09	8	0.941765	0	16.05	50.78	8	0.87899	0	1.04573	0.236531
tr|A0A0G2K2Y3|A0A0G2K2Y3_RAT	Aminopeptidase OS=Rattus norvegicus GN=Erap1 PE=1 SV=1	11.04	14.48	6	1.16888	0.558725	7.43	15.72	4	0.88655	0.526836	7.97	14.03	4	1.08248	0.672454	1.04597	0.144661
tr|A0A0G2K0I3|A0A0G2K0I3_RAT	Nicotinamide phosphoribosyltransferase OS=Rattus norvegicus GN=Nampt PE=1 SV=1	13.98	41.42	7	1.08606	0.482905	14.85	42.68	8	0.968408	0.718476	17.97	41.63	10	1.08377	0.563877	1.04608	0.067274
tr|D4A4Z9|D4A4Z9_RAT	Kinectin 1 OS=Rattus norvegicus GN=Ktn1 PE=1 SV=2	29.47	42.64	15	1.00465	0.930031	37.39	43.47	18	1.11705	0.195535	43.71	40.6	24	1.0169	0.830284	1.0462	0.0616597
tr|D3ZAN3|D3ZAN3_RAT	Alpha glucosidase 2 alpha neutral subunit (Predicted) OS=Rattus norvegicus GN=Ganab PE=1 SV=1	34.31	40.78	16	1.13049	0.101043	33.32	39.02	17	0.96853	0.390891	31.35	39.15	15	1.03977	0.514576	1.04626	0.0811733
tr|F1LPG3|F1LPG3_RAT	Phosphofurin acidic cluster sorting protein 1 OS=Rattus norvegicus GN=Pacs1 PE=1 SV=1	18.45	25.39	10	0.95987	0.377777	20.33	31.22	11	1.37578	0.475397	14.46	30.59	9	0.803404	0.20765	1.04635	0.295828
tr|B1H2A2|B1H2A2_RAT	Fibronectin type III and SPRY domain-containing 1 OS=Rattus norvegicus GN=Fsd1 PE=1 SV=1	18.5	50.4	9	1.06404	0.352856	21.62	52.82	11	1.07454	0.67551	19.57	46.98	11	1.00053	0.994987	1.04637	0.0400446
tr|A0A0G2JVM2|A0A0G2JVM2_RAT	MIA family member 3, ER export factor OS=Rattus norvegicus GN=Mia3 PE=1 SV=1	4.39	29.19	2	1.0509	0	5.75	32.24	3	0.952701	0.794928	7.77	28.4	5	1.13664	0.736591	1.04675	0.0920377
tr|F1M7V6|F1M7V6_RAT	Cell adhesion molecule 4 OS=Rattus norvegicus GN=Cadm4 PE=1 SV=2	18.23	44.76	10	1.12904	0.0562783	20.12	45.81	11	0.967502	0.4848	18.45	46.86	9	1.04422	0.584854	1.04692	0.0808031
sp|Q8K4Y5|LGI1_RAT	Leucine-rich glioma-inactivated protein 1 OS=Rattus norvegicus GN=Lgi1 PE=1 SV=1	15.15	35.55	8	1.05882	0.301587	17.58	37.52	9	1.09744	0.184804	16.29	27.83	8	0.984753	0.80758	1.047	0.057266
sp|Q3B8N7|T22D4_RAT	TSC22 domain family protein 4 OS=Rattus norvegicus GN=Tsc22d4 PE=1 SV=1	3.49	24.81	2	1.04805	0	5.6	29.97	4	0.956276	0.761775	6.03	37.21	4	1.13696	0.436943	1.0471	0.090344
sp|Q63768|CRK_RAT	Adapter molecule crk OS=Rattus norvegicus GN=Crk PE=1 SV=1	24.23	46.71	12	1.06947	0.160846	27.52	56.25	14	1.02017	0.815247	27.09	59.87	13	1.05207	0.784298	1.04724	0.025004
sp|P62076|TIM13_RAT	Mitochondrial import inner membrane translocase subunit Tim13 OS=Rattus norvegicus GN=Timm13 PE=3 SV=1	6.53	53.68	3	1.18952	0.154686	7.88	71.58	5	1.02087	0.811233	7.16	62.11	4	0.931817	0.529672	1.0474	0.130884
sp|P15999|ATPA_RAT	ATP synthase subunit alpha, mitochondrial OS=Rattus norvegicus GN=Atp5a1 PE=1 SV=2	72.79	70.71	40	1.03892	0.379736	79.53	66.91	44	1.07446	0.115422	76.63	69.26	42	1.02909	0.635631	1.04749	0.0238692
sp|Q4QQW8|PLBL2_RAT	Putative phospholipase B-like 2 OS=Rattus norvegicus GN=Plbd2 PE=1 SV=2	4.7	26.32	2	0.83361	0.654585	7.87	28.72	4	1.15945	0.272564	9.64	22.56	6	1.14955	0.432206	1.04754	0.185333
sp|P04631|S100B_RAT	Protein S100-B OS=Rattus norvegicus GN=S100b PE=1 SV=2	6	40.22	3	1.1154	0.384922	6	46.74	3	0.969135	0.782461	6	44.57	3	1.05847	0.635714	1.04767	0.0737293
sp|P55053|FABP5_RAT	Fatty acid-binding protein, epidermal OS=Rattus norvegicus GN=Fabp5 PE=1 SV=3	22	73.33	13	0.978556	0.871888	27.2	80.74	16	0.97678	0.849799	26.44	85.93	14	1.18768	0.0169066	1.04767	0.121254
sp|Q5EGY4|YKT6_RAT	Synaptobrevin homolog YKT6 OS=Rattus norvegicus GN=Ykt6 PE=1 SV=1	11.14	51.01	6	1.03889	0.611615	13.24	65.15	7	1.01067	0.849821	15.19	73.74	8	1.09379	0.634244	1.04778	0.0422659
sp|Q920Q0|PALM_RAT	Paralemmin-1 OS=Rattus norvegicus GN=Palm PE=1 SV=1	18.81	55.35	10	1.07951	0.355296	19.65	64.75	10	1.01699	0.85702	18.58	46.74	10	1.04685	0.671711	1.04779	0.0312699
sp|P47942|DPYL2_RAT	Dihydropyrimidinase-related protein 2 OS=Rattus norvegicus GN=Dpysl2 PE=1 SV=1	58.92	70.45	33	1.09371	0.142252	66.94	78.5	40	0.999527	0.994178	62.98	75.87	37	1.05072	0.620414	1.04798	0.0471498
tr|D3ZBL5|D3ZBL5_RAT	Type I inositol 3,4-bisphosphate 4-phosphatase OS=Rattus norvegicus GN=Inpp4a PE=1 SV=3	6.48	19.49	4	0.958234	0.810797	14.87	35.78	8	1.017	0.780578	7.67	35.36	5	1.16893	0.663323	1.04806	0.108728
sp|P70550|RAB8B_RAT	Ras-related protein Rab-8B OS=Rattus norvegicus GN=Rab8b PE=1 SV=1	14.07	57.97	7	1.08921	0.598678	12.75	42.51	7	0.989662	0.953379	13.94	57.97	7	1.06549	0	1.04812	0.0519949
tr|D3ZFA8|D3ZFA8_RAT	40S ribosomal protein S17-like OS=Rattus norvegicus GN=LOC100362366 PE=3 SV=1	7.89	65.19	4	1.0946	0.422562	5.21	80.74	4	0.948254	0.61804	6.81	62.22	4	1.10155	0.376001	1.04814	0.0865697
tr|D3ZIE9|D3ZIE9_RAT	Delta-1-pyrroline-5-carboxylate synthase OS=Rattus norvegicus GN=Aldh18a1 PE=3 SV=1	15.73	18.11	9	1.09093	0.388475	10.91	33.96	5	0.977838	0.877678	14.71	32.7	7	1.07583	0.51478	1.0482	0.0614004
sp|O88794|PNPO_RAT	Pyridoxine-5'-phosphate oxidase OS=Rattus norvegicus GN=Pnpo PE=1 SV=1	6.64	44.06	4	1.08184	0.316352	8.49	45.59	5	0.994092	0.990058	11.21	40.61	6	1.06933	0.440687	1.04842	0.0474641
tr|B0BNL2|B0BNL2_RAT	Peptidyl-prolyl cis-trans isomerase OS=Rattus norvegicus GN=Pin1 PE=1 SV=1	15.62	65.45	9	1.03543	0.664487	16	69.09	8	1.01928	0.751218	16	84.85	9	1.0906	0.166436	1.04844	0.0373987
tr|Q68G41|Q68G41_RAT	Dodecenoyl-Coenzyme A delta isomerase (3,2 trans-enoyl-Coenzyme A isomerase) OS=Rattus norvegicus GN=Eci1 PE=1 SV=1	10.11	30.8	5	0.914435	0.690353	13.14	31.14	7	1.19383	0.633644	12.31	31.49	6	1.03745	0.894941	1.04857	0.14003
sp|P08082|CLCB_RAT	Clathrin light chain B OS=Rattus norvegicus GN=Cltb PE=1 SV=1	21.64	42.79	12	0.992738	0.921419	24.43	40.17	13	1.03819	0.609724	19.42	45.85	11	1.11502	0.45894	1.04865	0.0618075
sp|Q06486|KC1D_RAT	Casein kinase I isoform delta OS=Rattus norvegicus GN=Csnk1d PE=1 SV=2	4.47	40.24	2	1.11311	0	4.6	36.87	3	1.02502	0	7.14	38.07	4	1.00796	0.951157	1.0487	0.0564336
sp|P50430|ARSB_RAT	Arylsulfatase B OS=Rattus norvegicus GN=Arsb PE=2 SV=2	6.62	23.48	3	0.93157	0.825526	8.84	28.41	5	1.19288	0.28915	7.37	24.62	4	1.02221	0.893031	1.04889	0.132679
tr|M0R961|M0R961_RAT	Far upstream element-binding protein 2 OS=Rattus norvegicus GN=Khsrp PE=1 SV=1	22.79	40.78	12	1.03087	0.514273	24.78	36.62	14	1.07367	0.273315	26.02	37.31	13	1.0426	0.762794	1.04905	0.0221189
tr|D3ZA31|D3ZA31_RAT	Myotubularin related protein 2 (Predicted), isoform CRA_b OS=Rattus norvegicus GN=Mtmr2 PE=1 SV=1	6.67	33.44	3	1.05991	0.413892	11.17	32.81	6	1.08541	0.450925	14.76	34.21	8	1.00207	0.97539	1.04913	0.0427026
tr|F1M4A0|F1M4A0_RAT	Tight junction protein 1 OS=Rattus norvegicus GN=Tjp1 PE=1 SV=2	25.85	29.95	14	0.909732	0.390084	12.21	29.54	7	1.04404	0.805811	21.67	26.54	14	1.19464	0.0268192	1.04947	0.142532
sp|P17046|LAMP2_RAT	Lysosome-associated membrane glycoprotein 2 OS=Rattus norvegicus GN=Lamp2 PE=1 SV=3	3.03	6.326	2	0.930431	0.497508	3.54	6.326	2	1.06834	0.516159	3.13	13.14	2	1.14981	0.285679	1.04953	0.110894
sp|P19643|AOFB_RAT	Amine oxidase [flavin-containing] B OS=Rattus norvegicus GN=Maob PE=1 SV=3	16.23	29.62	9	0.982876	0.755673	24.78	43.65	13	1.10752	0.574058	21.95	41.54	11	1.05862	0.310881	1.04967	0.062804
sp|Q02589|ADPRH_RAT	[Protein ADP-ribosylarginine] hydrolase OS=Rattus norvegicus GN=Adprh PE=1 SV=2	9.5	27.9	5	1.15006	0.108917	11.54	39.78	7	0.97397	0.843802	8.77	26.8	4	1.02527	0.846055	1.04977	0.0905648
tr|F7EV94|F7EV94_RAT	2-oxoisovalerate dehydrogenase subunit alpha, mitochondrial OS=Rattus norvegicus GN=Bckdha PE=1 SV=1	10.05	30.6	5	0.825534	0.138135	14.28	45.47	7	1.04568	0.740143	13.95	55.6	7	1.27861	0.0884835	1.04994	0.22657
tr|F1LNB3|F1LNB3_RAT	A-kinase-anchoring protein 10 OS=Rattus norvegicus GN=Akap10 PE=1 SV=1	6.11	30.97	3	1.02576	0.858631	4.09	19.18	2	1.08487	0.573184	4.03	19.18	2	1.03946	0.784749	1.05003	0.0309402
tr|Q6AYF8|Q6AYF8_RAT	RCG43931 OS=Rattus norvegicus GN=Serpinb9 PE=1 SV=1	9.36	31.82	5	1.05004	0.783832	16.31	54.01	9	0.990647	0.932836	17.2	43.85	9	1.10973	0.124404	1.05014	0.0595433
sp|Q60587|ECHB_RAT	Trifunctional enzyme subunit beta, mitochondrial OS=Rattus norvegicus GN=Hadhb PE=1 SV=1	21.16	42.53	10	0.989787	0.874148	28.91	46.11	14	1.14123	0.101555	25.08	53.26	12	1.01944	0.782675	1.05015	0.0802591
sp|P47863|AQP4_RAT	Aquaporin-4 OS=Rattus norvegicus GN=Aqp4 PE=1 SV=1	11.44	23.84	6	1.05501	0.851836	13.4	28.17	7	1.17086	0.58608	10.19	24.77	5	0.924899	0.627309	1.05025	0.123047
sp|P16970|ABCD3_RAT	ATP-binding cassette sub-family D member 3 OS=Rattus norvegicus GN=Abcd3 PE=1 SV=3	12.88	31.56	7	1.12162	0.1564	16.73	24.73	9	0.975346	0.803298	13.5	22.76	7	1.05381	0.758198	1.05026	0.0732035
sp|P11517|HBB2_RAT	Hemoglobin subunit beta-2 OS=Rattus norvegicus PE=1 SV=2	31.17	82.99	20	1.13794	0.9033	35.13	80.27	20	0.795468	0.522238	29.64	86.39	18	1.2176	0.473012	1.05034	0.224289
tr|A0A0G2JSI1|A0A0G2JSI1_RAT	4-trimethylaminobutyraldehyde dehydrogenase OS=Rattus norvegicus GN=Aldh9a1 PE=1 SV=1	49.05	61.37	26	1.07142	0.288372	43.94	59.36	24	0.980575	0.74356	47.64	61.17	24	1.09941	0.044723	1.05047	0.0621252
tr|F1M471|F1M471_RAT	EPM2A-interacting protein 1 OS=Rattus norvegicus GN=Epm2aip1 PE=1 SV=3	19.84	48.18	10	1.13807	0.0804129	14.48	32.84	7	1.02905	0.597041	16.09	36.63	9	0.985211	0.838035	1.05078	0.0787102
sp|B2DD29|BRSK1_RAT	Serine/threonine-protein kinase BRSK1 OS=Rattus norvegicus GN=Brsk1 PE=1 SV=1	7.42	31.36	4	1.00467	0.981661	10.02	38.82	5	1.11089	0.508707	11.36	31.75	6	1.03759	0.649483	1.05105	0.0543773
tr|D3ZY47|D3ZY47_RAT	Similar to RIKEN cDNA 2310022B05 OS=Rattus norvegicus GN=RGD1559896 PE=1 SV=1	6.02	43.83	3	1.09106	0.627088	4.34	44.14	2	1.09715	0.340941	7.29	33.33	4	0.965042	0.801855	1.05108	0.0745748
tr|G3V8V0|G3V8V0_RAT	ADP-ribosylation factor-like protein 2 OS=Rattus norvegicus GN=Arl2 PE=1 SV=2	5.86	38.86	3	1.06601	0.638253	6.08	33.14	3	1.08347	0.854766	7.33	31.43	4	1.00385	0.986801	1.05111	0.0418479
sp|Q9EQX9|UBE2N_RAT	Ubiquitin-conjugating enzyme E2 N OS=Rattus norvegicus GN=Ube2n PE=1 SV=1	13.38	61.84	7	1.02542	0.738796	15.03	61.18	7	1.0771	0.292401	16.02	61.18	8	1.05099	0.640711	1.05117	0.0258415
tr|F1LY09|F1LY09_RAT	ARP3 actin-related protein 3 homolog B OS=Rattus norvegicus GN=Actr3b PE=3 SV=2	10.27	37.14	5	1.14973	0.777331	6.21	43.81	4	0.792939	0	7.47	26.98	4	1.21168	0	1.05145	0.22601
tr|A0A0G2JVK2|A0A0G2JVK2_RAT	Serine/threonine-protein phosphatase OS=Rattus norvegicus GN=Ppp1cc PE=1 SV=1	19.77	54.22	10	1.06248	0.612854	21.62	46.99	11	1.10534	0	22.28	50.3	10	0.987564	0	1.05179	0.0596097
sp|P09951|SYN1_RAT	Synapsin-1 OS=Rattus norvegicus GN=Syn1 PE=1 SV=3	47.3	55.97	24	1.11106	0.0812975	49.03	48.15	25	1.04618	0.238407	48.29	49.01	25	0.998495	0.977436	1.05191	0.0565001
tr|B5DEY8|B5DEY8_RAT	Sorting nexin OS=Rattus norvegicus GN=Snx6 PE=1 SV=1	16.33	47.29	8	1.18613	0.0492698	11.51	33.25	6	0.968243	0.842265	10.35	50.49	5	1.00163	0.992835	1.052	0.11735
tr|D4A3D4|D4A3D4_RAT	Abhydrolase domain containing 3 (Predicted) OS=Rattus norvegicus GN=Abhd3 PE=4 SV=2	8.03	23.36	4	1.0786	0.652619	12.43	28.95	6	1.05742	0.604394	10.06	25.06	5	1.02014	0.811522	1.05205	0.0296015
sp|P54311|GBB1_RAT	Guanine nucleotide-binding protein G(I)/G(S)/G(T) subunit beta-1 OS=Rattus norvegicus GN=Gnb1 PE=1 SV=4	27.27	61.76	15	1.09694	0.165241	26.32	62.65	14	1.03192	0.774461	26.07	58.53	16	1.02746	0.690194	1.05211	0.0388922
tr|D4A9D8|D4A9D8_RAT	Oxysterol-binding protein OS=Rattus norvegicus GN=Osbp PE=1 SV=2	15.36	41.35	8	1.0309	0.785227	18.97	39.44	9	1.12237	0.585925	14.45	32.11	7	1.00328	0.989966	1.05218	0.0623325
tr|G3V7U4|G3V7U4_RAT	Lamin-B1 OS=Rattus norvegicus GN=Lmnb1 PE=1 SV=1	43.52	56.73	22	1.01051	0.921839	42.55	59.28	19	1.01286	0.913642	41.18	58.26	20	1.13411	0.3277	1.0525	0.0706905
tr|G3V8D6|G3V8D6_RAT	Tripartite motif protein 3, isoform CRA_a OS=Rattus norvegicus GN=Trim3 PE=1 SV=1	25.43	38.58	12	1.08762	0.468256	24.15	37.5	13	1.05789	0.822423	27.95	32.53	14	1.01277	0.899973	1.05276	0.0376881
tr|B0K017|B0K017_RAT	ADP-ribosylhydrolase like 2 (Predicted) OS=Rattus norvegicus GN=Adprhl2 PE=1 SV=1	5.31	18.65	3	1.27442	0.0954352	7.78	26.22	4	0.919934	0.622728	10.28	31.35	5	0.964426	0.860605	1.05293	0.193105
sp|Q3T1K5|CAZA2_RAT	F-actin-capping protein subunit alpha-2 OS=Rattus norvegicus GN=Capza2 PE=1 SV=1	11.44	61.54	6	1.06445	0.630917	13.78	53.5	8	1.04997	0.483254	16.2	43.36	10	1.04443	0.555994	1.05295	0.0103369
sp|Q9JJW1|TSN2_RAT	Tetraspanin-2 OS=Rattus norvegicus GN=Tspan2 PE=1 SV=1	4.01	21.72	2	1.00948	0.949347	4	12.22	2	1.1233	0.493265	4.02	22.17	2	1.02649	0.928029	1.05309	0.061398
sp|P31647|S6A11_RAT	Sodium- and chloride-dependent GABA transporter 3 OS=Rattus norvegicus GN=Slc6a11 PE=1 SV=1	17.8	18.5	9	1.03743	0.628433	19.51	17.86	10	1.19604	0.105211	16.01	19.46	8	0.926346	0.55251	1.05327	0.135545
tr|M0R9I6|M0R9I6_RAT	Aminomethyltransferase OS=Rattus norvegicus GN=Amt PE=1 SV=2	2.78	18.36	2	0.945591	0	4.33	23.82	2	1.10155	0.515455	4.77	31.02	2	1.11348	0.18993	1.05354	0.0936768
tr|A0A0G2K7G7|A0A0G2K7G7_RAT	Septin-8 OS=Rattus norvegicus GN=Sept8 PE=1 SV=1	39.77	65.01	19	1.24375	0.043763	49.48	66.25	27	0.972155	0.748003	45.33	60.66	22	0.945321	0.597487	1.05374	0.1651
tr|D4A478|D4A478_RAT	Nucleoside-triphosphatase, cancer-related OS=Rattus norvegicus GN=Ntpcr PE=1 SV=1	4.01	38.54	2	1.19452	0.323772	8.43	59.38	4	0.81361	0.790317	4.87	39.58	3	1.15311	0.431888	1.05375	0.208992
tr|D4A3V2|D4A3V2_RAT	NADH dehydrogenase [ubiquinone] 1 alpha subcomplex subunit 6 OS=Rattus norvegicus GN=Ndufa6 PE=1 SV=1	8.76	60	5	1.00752	0.973549	8.57	43.85	5	1.17774	0.12012	6.99	62.31	5	0.976043	0.911067	1.05377	0.108509
sp|P12007|IVD_RAT	Isovaleryl-CoA dehydrogenase, mitochondrial OS=Rattus norvegicus GN=Ivd PE=1 SV=2	21.38	37.26	11	1.01195	0.808572	20.49	40.57	11	1.12788	0.0231414	20.34	37.97	11	1.02157	0.64301	1.0538	0.0643374
tr|Q56A26|Q56A26_RAT	Oligodendrocytic myelin paranodal and inner loop protein OS=Rattus norvegicus GN=Opalin PE=2 SV=1	7.13	59.86	3	1.0727	0.466273	10.16	45.07	6	1.15581	0.191604	7.55	43.66	4	0.934322	0.551185	1.05427	0.111885
sp|P12785|FAS_RAT	Fatty acid synthase OS=Rattus norvegicus GN=Fasn PE=1 SV=3	134.38	43.51	77	1.231	4.23055e-08	151.8	49.1	84	0.958646	0.389436	149.04	48.74	84	0.973299	0.605948	1.05432	0.15319
tr|A0A0G2K5X6|A0A0G2K5X6_RAT	Tyrosine-protein kinase receptor OS=Rattus norvegicus GN=Ntrk2 PE=1 SV=1	6.2	18.16	3	0.98893	0.964714	7.18	19.71	4	1.10954	0.871805	8.49	17.8	4	1.06477	0.938058	1.05441	0.0609694
tr|G3V852|G3V852_RAT	RCG55135, isoform CRA_b OS=Rattus norvegicus GN=Tln1 PE=1 SV=1	101.73	48.25	56	1.01379	0.879391	108.38	48.96	57	0.97335	0.700968	108.8	48.21	57	1.17655	0.144396	1.05456	0.107561
tr|A0A0G2K9P4|A0A0G2K9P4_RAT	Endophilin-B2 OS=Rattus norvegicus GN=Sh3glb2 PE=1 SV=1	27.24	50	15	1.2176	0.00608458	26.22	47.5	13	0.934464	0	24.02	46	12	1.01222	0.849381	1.05476	0.146286
tr|G3V845|G3V845_RAT	Phosphoinositide phospholipase C OS=Rattus norvegicus GN=Plcg1 PE=1 SV=1	6.08	24.96	3	1.13005	0.309402	8.17	16.51	5	0.937475	0.521962	4.43	25.74	3	1.09696	0.482193	1.05483	0.102967
sp|Q62920|PDLI5_RAT	PDZ and LIM domain protein 5 OS=Rattus norvegicus GN=Pdlim5 PE=1 SV=2	11.73	40.1	6	1.06757	0.698095	10.21	33.5	6	1.06585	0.669648	11.77	36.38	5	1.03151	0.830928	1.05498	0.0203396
sp|Q641Z8|PEF1_RAT	Peflin OS=Rattus norvegicus GN=Pef1 PE=2 SV=1	7.2	17.67	4	1.20707	0.357698	9.55	21.55	5	1.00105	0.996177	6.62	17.67	4	0.956936	0.590374	1.05502	0.133514
sp|Q5XFW8|SEC13_RAT	Protein SEC13 homolog OS=Rattus norvegicus GN=Sec13 PE=1 SV=1	5.07	20.19	3	0.865683	0.231053	6	21.12	3	1.03919	0.695204	6	22.67	4	1.2614	0.10533	1.05542	0.198359
tr|M0RAQ6|M0RAQ6_RAT	Hexokinase-1 OS=Rattus norvegicus GN=Hk1 PE=1 SV=2	67.6	47.26	32	1.06069	0.804368	75.73	49.5	38	1.16433	0	72.26	49.72	35	0.942107	0	1.05571	0.111197
sp|Q68FS4|AMPL_RAT	Cytosol aminopeptidase OS=Rattus norvegicus GN=Lap3 PE=1 SV=1	44	67.44	22	1.09475	0.283012	45.07	62.04	23	0.954997	0.238024	41.4	64.55	20	1.11739	0.515755	1.05571	0.087953
tr|G3V8U9|G3V8U9_RAT	Proteasome subunit beta OS=Rattus norvegicus GN=Psmb4 PE=1 SV=2	12.04	49.14	6	1.01645	0.795634	13.85	51.29	7	1.01622	0.794976	13.64	52.59	7	1.13447	0.0679257	1.05571	0.068204
tr|G3V940|G3V940_RAT	Coronin OS=Rattus norvegicus GN=Coro1b PE=1 SV=1	12.38	35.33	7	0.957191	0.639124	18.46	39.05	9	1.03341	0.574059	17.14	42.36	9	1.1766	0.192555	1.05573	0.111393
tr|Q6P685|Q6P685_RAT	Eukaryotic translation initiation factor 2 subunit beta OS=Rattus norvegicus GN=Eif2s2 PE=1 SV=1	12.13	47.75	6	1.07728	0.302482	11.75	41.44	6	0.975575	0.878793	15.56	53.75	9	1.11462	0.541139	1.05582	0.0719622
sp|P21913|SDHB_RAT	Succinate dehydrogenase [ubiquinone] iron-sulfur subunit, mitochondrial OS=Rattus norvegicus GN=Sdhb PE=2 SV=2	25.61	60.99	14	1.00442	0.972378	25.25	60.28	14	1.15481	0.288803	26.26	64.54	13	1.00855	0.961905	1.05593	0.085659
sp|P31044|PEBP1_RAT	Phosphatidylethanolamine-binding protein 1 OS=Rattus norvegicus GN=Pebp1 PE=1 SV=3	21.21	94.65	11	1.07365	0.476721	29.08	82.89	16	1.00612	0.930077	26.07	68.98	13	1.08831	0.393553	1.05602	0.0438374
sp|P40329|SYRC_RAT	Arginine--tRNA ligase, cytoplasmic OS=Rattus norvegicus GN=Rars PE=1 SV=2	36.01	41.52	19	1.17118	0.386192	34.28	48.94	17	0.917582	0.538406	32.77	49.85	18	1.08009	0.482594	1.05628	0.128463
sp|A2RUW1|TOLIP_RAT	Toll-interacting protein OS=Rattus norvegicus GN=Tollip PE=1 SV=1	14	39.42	7	1.01742	0.771175	13.74	36.86	7	1.14172	0.0773265	13.84	39.05	7	1.00978	0.860539	1.05631	0.0740682
tr|Q7TPH4|Q7TPH4_RAT	Dystrophin OS=Rattus norvegicus GN=Dmd PE=1 SV=2	14.19	29.97	7	1.05412	0.750903	12.09	29.64	7	1.00936	0.936138	13.33	34.93	7	1.10583	0.190799	1.05643	0.0482771
sp|Q68FU3|ETFB_RAT	Electron transfer flavoprotein subunit beta OS=Rattus norvegicus GN=Etfb PE=1 SV=3	24.05	64.31	13	1.02317	0.823508	24.59	63.53	13	1.18881	0.0168259	25.8	66.27	13	0.95825	0.337876	1.05674	0.11889
tr|Z4YNF4|Z4YNF4_RAT	Low molecular weight phosphotyrosine protein phosphatase OS=Rattus norvegicus GN=Acp1 PE=1 SV=2	14.61	51.57	7	0.947289	0.47379	13.89	40.88	8	1.11122	0.176622	14.22	59.12	8	1.11222	0.217697	1.05691	0.0949372
tr|F8WFK6|F8WFK6_RAT	Glutathione peroxidase OS=Rattus norvegicus GN=Gpx4 PE=1 SV=2	15.89	50.79	8	1.16725	0.538116	14.49	52.38	7	0.925049	0.64024	14.63	56.75	7	1.0787	0.402783	1.057	0.122548
tr|F8WFS9|F8WFS9_RAT	Beta-adducin OS=Rattus norvegicus GN=Add2 PE=1 SV=1	21.6	40.83	11	1.13049	0.198056	24.17	46.34	11	1.01581	0.917678	27.52	37.79	14	1.0248	0.648492	1.05703	0.0637724
sp|Q4QRB4|TBB3_RAT	Tubulin beta-3 chain OS=Rattus norvegicus GN=Tubb3 PE=1 SV=1	61.42	75.11	36	1.1793	0.014348	63.94	74.44	41	0.95726	0.575538	64.27	74.89	37	1.03484	0.599291	1.05713	0.112684
tr|Q3ZB99|Q3ZB99_RAT	Tight junction protein 2 OS=Rattus norvegicus GN=Tjp2 PE=1 SV=1	16.81	43.47	9	1.15091	0.518139	18.89	42.7	9	1.02261	0.852849	19.34	38.83	11	0.997988	0.981202	1.05717	0.0821086
tr|A0A0H2UHA6|A0A0H2UHA6_RAT	Transmembrane protein 33 OS=Rattus norvegicus GN=Tmem33 PE=1 SV=1	4.85	23.98	3	1.0801	0.640596	8.13	30.89	5	1.07417	0.526004	5.5	21.95	3	1.01786	0.882483	1.05738	0.0343473
tr|A0A0G2K5Q8|A0A0G2K5Q8_RAT	Secretory carrier-associated membrane protein OS=Rattus norvegicus GN=Clk2 PE=1 SV=1	13.99	18.02	7	1.10089	0.314438	12.55	16.52	7	1.00114	0.991995	10.02	21.53	5	1.0707	0.900639	1.05758	0.0511547
tr|A0A0G2K4X8|A0A0G2K4X8_RAT	S-phase kinase-associated protein 1 OS=Rattus norvegicus GN=Skp1 PE=1 SV=1	20.18	70.3	11	1.09087	0.607494	16.71	65.45	9	1.02655	0.736012	16.2	70.3	10	1.05535	0.612611	1.05759	0.0322145
tr|D4ACB8|D4ACB8_RAT	Chaperonin subunit 8 (Theta) (Predicted), isoform CRA_a OS=Rattus norvegicus GN=Cct8 PE=1 SV=1	57.45	65.33	28	1.10456	0.21995	52.15	59.49	25	1.02875	0.642949	56.66	62.41	29	1.03987	0.486589	1.05772	0.0409358
tr|A0A0G2K562|A0A0G2K562_RAT	Disintegrin and metalloproteinase domain-containing protein 10 OS=Rattus norvegicus GN=Adam10 PE=1 SV=1	12.3	28.44	6	1.08333	0.534504	13.33	29.51	7	1.03765	0.861207	12.02	26.17	6	1.05233	0.778687	1.05777	0.0233185
sp|P01041|CYTB_RAT	Cystatin-B OS=Rattus norvegicus GN=Cstb PE=1 SV=1	3.82	58.16	2	0.97976	0.891034	5.2	57.14	3	1.09135	0.522053	4.08	52.04	2	1.10228	0.648105	1.0578	0.0678014
tr|A0A0G2JTS3|A0A0G2JTS3_RAT	Vacuolar protein sorting-associated protein 29 OS=Rattus norvegicus GN=Vps29 PE=1 SV=1	7.57	24.4	4	0.991555	0.904166	7.01	24.4	4	1.07379	0.59053	5.8	24.4	3	1.10864	0.318689	1.058	0.0601197
sp|Q64244|CD38_RAT	ADP-ribosyl cyclase/cyclic ADP-ribose hydrolase 1 OS=Rattus norvegicus GN=Cd38 PE=1 SV=1	9.13	31.02	5	0.984204	0.800451	10.56	33	5	1.01189	0.925412	7.39	28.38	4	1.17794	0.14216	1.05801	0.104777
tr|A0A0G2K0T6|A0A0G2K0T6_RAT	Gamma-synuclein OS=Rattus norvegicus GN=Sncg PE=1 SV=1	35.09	90.24	18	1.13153	0.411996	39.67	95.93	22	1.00421	0.961791	39.65	95.93	23	1.03862	0.733007	1.05812	0.0658576
tr|D3ZUX7|D3ZUX7_RAT	Acyl-CoA synthetase family member 3 OS=Rattus norvegicus GN=Acsf3 PE=1 SV=1	12.77	38.08	6	1.15622	0.151059	12.94	44.6	6	1.05462	0.678045	18.76	36.88	10	0.963591	0.515039	1.05814	0.0963627
sp|Q62813|LSAMP_RAT	Limbic system-associated membrane protein OS=Rattus norvegicus GN=Lsamp PE=1 SV=1	14.97	48.82	8	1.1557	0.36347	13.47	52.96	7	1.07441	0.221209	12.87	44.67	7	0.944327	0.384953	1.05814	0.106621
tr|B2RYW3|B2RYW3_RAT	NADH dehydrogenase (Ubiquinone) 1 beta subcomplex, 9 OS=Rattus norvegicus GN=Ndufb9 PE=1 SV=1	14.31	73.74	7	1.06319	0.420704	12.26	69.27	7	1.16716	0.117306	14.02	64.8	7	0.944414	0.366832	1.05826	0.111455
sp|P81795|IF2G_RAT	Eukaryotic translation initiation factor 2 subunit 3, X-linked OS=Rattus norvegicus GN=Eif2s3 PE=1 SV=2	15.15	44.07	8	1.1234	0.292437	16.16	39.41	9	0.992603	0.952392	15.12	47.88	8	1.05975	0.561869	1.05858	0.0654067
tr|F1LPV0|F1LPV0_RAT	Asparaginyl-tRNA synthetase OS=Rattus norvegicus GN=Nars PE=1 SV=2	24.32	35.13	12	0.947437	0.722699	25.01	40.5	12	1.14132	0.0233525	29.25	52.15	16	1.08705	0.222008	1.0586	0.100025
tr|E9PTF9|E9PTF9_RAT	WAS protein family, member 2 OS=Rattus norvegicus GN=Wasf2 PE=1 SV=3	7.36	16.19	4	0.785561	0.476754	4.75	19.43	3	1.01984	0.885275	6.01	16.19	3	1.37056	0.0611194	1.05865	0.294423
tr|Q6AYS3|Q6AYS3_RAT	Carboxypeptidase OS=Rattus norvegicus GN=Ctsa PE=1 SV=1	4.07	26.75	3	1.08747	0.76941	5.08	26.97	3	0.954878	0.836711	6.09	27.19	3	1.13414	0.753117	1.05883	0.0930004
sp|Q5FWY5|AIP_RAT	AH receptor-interacting protein OS=Rattus norvegicus GN=Aip PE=1 SV=1	11.64	43.94	6	1.18887	0.240168	11.29	40.3	6	1.11485	0.3949	8.57	34.55	5	0.873063	0.510867	1.05893	0.165165
tr|D4AE56|D4AE56_RAT	Prostaglandin E synthase 2 OS=Rattus norvegicus GN=Ptges2 PE=1 SV=1	4.01	27.08	2	1.08368	0.584105	6.93	30.21	4	1.03616	0.667643	6.16	40.36	3	1.05775	0.790153	1.0592	0.0237942
tr|B5DF46|B5DF46_RAT	Phosphomannomutase OS=Rattus norvegicus GN=Pmm2 PE=1 SV=1	6.72	33.47	4	1.04779	0.624699	4.27	36.36	2	1.06856	0.627661	3.18	32.64	3	1.06131	0.663372	1.05922	0.0105408
tr|B5DFJ4|B5DFJ4_RAT	VPS18 CORVET/HOPS core subunit OS=Rattus norvegicus GN=Vps18 PE=1 SV=1	11.79	23.02	6	0.880355	0.157642	12.42	21.38	6	1.02453	0.827131	10.31	21.38	5	1.27324	0.250339	1.05937	0.198749
tr|F1M787|F1M787_RAT	Catenin delta-2 OS=Rattus norvegicus GN=Ctnnd2 PE=1 SV=3	21.69	37.39	11	1.10412	0.381135	25.85	31.06	15	1.11196	0.237773	23.64	36.33	13	0.962078	0.60331	1.05939	0.084364
tr|M0RB63|M0RB63_RAT	RCG63041 OS=Rattus norvegicus GN=LOC684509 PE=4 SV=1	5.5	48.81	3	1.02158	0.819529	4.1	48.81	2	0.993853	0.950913	6.07	48.81	3	1.1629	0.211559	1.05944	0.0906644
tr|F1LM55|F1LM55_RAT	Cell cycle and apoptosis regulator 2 OS=Rattus norvegicus GN=Ccar2 PE=1 SV=1	6.41	16.05	4	1.1264	0.585974	10.64	26.9	6	0.944889	0.483939	14.22	18.66	7	1.10727	0.463312	1.05952	0.0997308
tr|Q5VLR5|Q5VLR5_RAT	BWK4 OS=Rattus norvegicus GN=Erp44 PE=1 SV=1	9.69	40.89	5	1.03256	0.623698	16.86	48.77	9	1.00789	0.953855	9.74	38.42	5	1.13836	0.319485	1.05961	0.0693119
sp|O35987|NSF1C_RAT	NSFL1 cofactor p47 OS=Rattus norvegicus GN=Nsfl1c PE=1 SV=1	24.53	64.86	11	1.06519	0.716283	29.15	63.24	15	0.989599	0.898573	28.53	64.32	16	1.12407	0.540081	1.05962	0.0674056
tr|A0A0H2UHN2|A0A0H2UHN2_RAT	Isopentenyl-diphosphate Delta-isomerase 1 OS=Rattus norvegicus GN=Idi1 PE=1 SV=1	6.81	29.33	3	1.20511	0.0780097	8.54	32.86	5	0.946594	0.793206	7.91	23.32	5	1.02748	0.844413	1.05973	0.132242
tr|G3V7G9|G3V7G9_RAT	Eukaryotic translation initiation factor 3, subunit 6 interacting protein OS=Rattus norvegicus GN=Eif3l PE=1 SV=2	5.55	23.82	3	0.861852	0.229939	6.12	43.46	3	1.10071	0.730067	8.17	34.82	4	1.21705	0.431243	1.05987	0.181086
tr|A0A0G2K761|A0A0G2K761_RAT	Cullin 2 OS=Rattus norvegicus GN=Cul2 PE=1 SV=1	5.26	26.71	2	1.04734	0.913771	14.59	34.09	7	0.98485	0.905563	15.36	33.69	8	1.14744	0.160369	1.05988	0.0820176
sp|Q5PQX1|TOIP1_RAT	Torsin-1A-interacting protein 1 OS=Rattus norvegicus GN=Tor1aip1 PE=1 SV=1	3.61	25.9	3	1.24031	0.262082	6.84	21.44	4	0.947573	0.703666	4.09	28.13	2	0.992077	0.978416	1.05999	0.157742
tr|M0R4H5|M0R4H5_RAT	PDZ and LIM domain protein 4 OS=Rattus norvegicus GN=Pdlim4 PE=1 SV=1	6.79	44.55	5	0.99825	0.987085	7.12	46.36	4	0.932961	0.258527	15.37	44.85	8	1.24906	0.344678	1.06009	0.166875
tr|G3V6W2|G3V6W2_RAT	Prolactin regulatory element-binding protein OS=Rattus norvegicus GN=Preb PE=1 SV=1	10.21	42.69	5	1.1077	0.597211	9.74	31.18	5	1.06347	0.855612	10.14	24.94	5	1.00932	0.939106	1.06016	0.0492725
sp|Q6P7A9|LYAG_RAT	Lysosomal alpha-glucosidase OS=Rattus norvegicus GN=Gaa PE=2 SV=1	17.89	23.29	10	1.09511	0.678394	14.72	22.98	8	1.04243	0.817784	14.9	20.25	7	1.04317	0.809702	1.06024	0.0302049
tr|Q8R3Z7|Q8R3Z7_RAT	EH-domain-containing 4 OS=Rattus norvegicus GN=Ehd4 PE=1 SV=1	19.5	48.24	10	0.99525	0.971745	23.11	40.85	12	1.11379	0.594613	21.19	37.52	10	1.07208	0.335369	1.06037	0.0601321
sp|Q62952|DPYL3_RAT	Dihydropyrimidinase-related protein 3 OS=Rattus norvegicus GN=Dpysl3 PE=1 SV=2	48.77	66.49	25	1.04998	0.627528	53.99	68.95	27	1.09876	0.578618	51.17	65.96	25	1.03263	0.58738	1.06046	0.0342877
tr|A0A0G2JZH8|A0A0G2JZH8_RAT	Dihydrolipoamide acetyltransferase component of pyruvate dehydrogenase complex OS=Rattus norvegicus GN=Pdhx PE=1 SV=1	15.67	41.63	8	0.924322	0.743571	18.76	40.64	10	1.13574	0.119165	14.9	45.82	7	1.12135	0.110752	1.06047	0.118128
sp|P52759|RIDA_RAT	2-iminobutanoate/2-iminopropanoate deaminase OS=Rattus norvegicus GN=Rida PE=1 SV=3	12.3	57.66	6	1.07039	0.277406	12.22	57.66	6	1.02684	0.645995	12.89	57.66	7	1.08507	0.336514	1.06077	0.0302829
sp|Q6P4Z9|CSN8_RAT	COP9 signalosome complex subunit 8 OS=Rattus norvegicus GN=Cops8 PE=2 SV=1	7	32.06	4	0.996544	0.968184	8.17	33.49	4	0.944128	0.833175	8.09	40.19	4	1.2421	0.858383	1.06093	0.159078
sp|P00406|COX2_RAT	Cytochrome c oxidase subunit 2 OS=Rattus norvegicus GN=Mtco2 PE=1 SV=3	8.82	26.43	5	1.01339	0.884366	6.2	26.43	4	1.10746	0.438785	5.15	14.54	3	1.06205	0.623597	1.06096	0.0470453
sp|P08050|CXA1_RAT	Gap junction alpha-1 protein OS=Rattus norvegicus GN=Gja1 PE=1 SV=2	20.14	40.05	12	1.03077	0.59257	19	34.03	12	1.17138	0.0166839	18.35	35.6	11	0.981536	0.839742	1.06123	0.0985182
sp|P04182|OAT_RAT	Ornithine aminotransferase, mitochondrial OS=Rattus norvegicus GN=Oat PE=1 SV=1	16.95	42.14	10	0.969593	0.552133	10.75	37.36	5	1.07339	0.493592	18.78	43.51	10	1.14122	0.0363754	1.0614	0.0864405
tr|Q68FY4|Q68FY4_RAT	Group specific component OS=Rattus norvegicus GN=Gc PE=1 SV=1	19.3	44.12	9	0.82358	0.306918	21.07	43.28	11	0.900461	0.254696	18.83	54.2	9	1.46083	0.00815589	1.06162	0.347853
tr|Q5U2N2|Q5U2N2_RAT	Ubiquitin specific protease 14 OS=Rattus norvegicus GN=Usp14 PE=1 SV=1	33.95	49.7	16	1.1109	0.0450957	36.49	54.56	18	0.998864	0.990175	33.51	48.48	16	1.07561	0.445686	1.06179	0.0572816
tr|Q6AY18|Q6AY18_RAT	Pyrophosphatase (inorganic) 1 OS=Rattus norvegicus GN=Sar1a PE=1 SV=1	5.75	28.28	3	1.12688	0.57228	8.41	37.88	4	0.995349	0.991007	8.81	44.95	4	1.0638	0.599277	1.06201	0.0657847
sp|Q68FR9|EF1D_RAT	Elongation factor 1-delta OS=Rattus norvegicus GN=Eef1d PE=1 SV=2	17.01	50.53	8	0.989474	0.896635	15.17	46.98	8	1.0595	0.432995	15.49	43.77	8	1.13733	0.0398202	1.0621	0.0739611
tr|M0RAD5|M0RAD5_RAT	ATP-dependent Clp protease proteolytic subunit OS=Rattus norvegicus GN=Clpp PE=1 SV=1	7.67	51.84	4	0.89242	0.9474	8.29	44.49	4	1.16334	0.28678	8.31	40.07	5	1.13127	0.288221	1.06234	0.148028
sp|Q3ZAV8|EDC4_RAT	Enhancer of mRNA-decapping protein 4 OS=Rattus norvegicus GN=Edc4 PE=1 SV=1	6.79	11.16	4	1.07636	0.80215	6.46	16.7	3	1.13902	0.73194	4.05	15.42	2	0.971891	0	1.06242	0.08443
tr|Q3MHS7|Q3MHS7_RAT	GDP-mannose 4, 6-dehydratase OS=Rattus norvegicus GN=Gmds PE=2 SV=1	9.1	39.52	5	1.06778	0.525694	14.05	50.54	7	1.08297	0.387553	12.21	45.97	6	1.03659	0.639051	1.06245	0.0236471
tr|D3ZIM7|D3ZIM7_RAT	Family with sequence similarity 177, member A1 OS=Rattus norvegicus GN=Fam177a1 PE=1 SV=1	8	32.69	4	0.994404	0.944596	8	24.04	4	0.954383	0.776948	9.34	38.94	5	1.23895	0.119383	1.06258	0.154045
tr|D3ZBX9|D3ZBX9_RAT	Coiled-coil domain-containing 92 OS=Rattus norvegicus GN=Ccdc92 PE=1 SV=1	11.6	35.99	7	1.09692	0.522524	5.53	39.49	3	0.941579	0.870025	4.78	47.77	2	1.14924	0.274158	1.06258	0.108005
sp|Q5I0D7|PEPD_RAT	Xaa-Pro dipeptidase OS=Rattus norvegicus GN=Pepd PE=2 SV=1	15.2	33.13	8	1.04625	0.402693	16.02	45.12	8	0.97873	0.846068	14.92	38.62	8	1.16306	0.0219024	1.06268	0.0932588
sp|Q99MZ8|LASP1_RAT	LIM and SH3 domain protein 1 OS=Rattus norvegicus GN=Lasp1 PE=1 SV=1	16.15	52.85	8	0.952092	0.911618	17.22	64.64	9	1.04687	0.358605	19.11	66.16	10	1.18931	0.00518087	1.06276	0.119405
sp|D3ZQL6|MILK1_RAT	MICAL-like protein 1 OS=Rattus norvegicus GN=Micall1 PE=1 SV=1	4.06	23.27	2	1.1425	0.412613	7.49	19.65	4	1.06643	0.787251	8.1	23.04	5	0.979714	0.87136	1.06288	0.0814501
tr|D3ZMI4|D3ZMI4_RAT	Band 4.1-like protein 1 OS=Rattus norvegicus GN=Epb41l1 PE=1 SV=1	49.87	46.62	26	1.19779	0.194239	64.24	44.81	33	1.08419	0.395259	61.57	40.62	34	0.90764	0.166892	1.06321	0.146209
tr|B1WBS4|B1WBS4_RAT	Similar to Vacuolar protein sorting 26 homolog (VPS26 protein homolog), isoform CRA_a OS=Rattus norvegicus GN=Vps26b PE=1 SV=1	10.24	33.93	5	0.982941	0.811111	12.97	35.12	7	0.971651	0.955233	17.2	35.71	9	1.23519	0.120391	1.06326	0.148999
tr|M0R660|M0R660_RAT	Glyceraldehyde-3-phosphate dehydrogenase OS=Rattus norvegicus PE=1 SV=1	42.21	65.47	24	1.40357	0.350582	39.14	65.17	25	0.89448	0.790891	37.68	66.07	23	0.891727	0.70904	1.06326	0.294724
tr|D4A1B8|D4A1B8_RAT	Dynactin subunit 3 OS=Rattus norvegicus GN=Dctn3 PE=1 SV=1	12.85	36.56	7	0.949592	0.762716	9.52	44.62	6	1.11354	0.601512	10.8	40.86	6	1.1267	0.272734	1.06328	0.0986729
sp|B2GV24|UFL1_RAT	E3 UFM1-protein ligase 1 OS=Rattus norvegicus GN=Ufl1 PE=1 SV=1	3.29	21.69	2	1.26799	0.109922	9.39	31.02	5	0.753588	0.626427	8.84	28.63	5	1.16828	0.169516	1.06329	0.272802
tr|A0A0G2K1S6|A0A0G2K1S6_RAT	Malic enzyme OS=Rattus norvegicus GN=Me1 PE=1 SV=1	32.55	49.74	17	1.2331	0.00364345	36.7	51.49	19	0.987539	0	34.37	49.56	17	0.969475	0.748495	1.06337	0.147267
tr|D4A0T0|D4A0T0_RAT	NADH:ubiquinone oxidoreductase subunit B10 OS=Rattus norvegicus GN=Ndufb10 PE=1 SV=1	20.92	59.66	10	0.982154	0.86476	22	72.16	11	1.20039	0.0534903	23.36	76.7	12	1.00847	0.933628	1.06367	0.119135
sp|Q3KRE0|ATAD3_RAT	ATPase family AAA domain-containing protein 3 OS=Rattus norvegicus GN=Atad3 PE=1 SV=1	12.05	33.84	6	1.00619	0.964829	18.76	44.33	9	1.18017	0.142506	16.45	40.1	9	1.00489	0.93364	1.06375	0.100822
tr|F1LNF1|F1LNF1_RAT	Heterogeneous nuclear ribonucleoproteins A2/B1 OS=Rattus norvegicus GN=Hnrnpa2b1 PE=1 SV=1	24.18	56.25	12	1.13166	0.105693	25.58	51.7	12	1.05008	0.443619	28.59	59.38	15	1.01054	0.931387	1.06409	0.0617636
tr|A0A0G2K121|A0A0G2K121_RAT	Malectin OS=Rattus norvegicus GN=Mlec PE=1 SV=1	12.13	53.4	6	0.999429	0.993317	13	47.28	7	1.10915	0.117444	9.63	31.63	5	1.08398	0.412561	1.06418	0.0574743
sp|P60881|SNP25_RAT	Synaptosomal-associated protein 25 OS=Rattus norvegicus GN=Snap25 PE=1 SV=1	38.26	87.38	22	1.03301	0.584153	39.56	90.29	24	1.08191	0.340743	36.32	88.35	21	1.07788	0.750316	1.06427	0.0271446
sp|P83868|TEBP_RAT	Prostaglandin E synthase 3 OS=Rattus norvegicus GN=Ptges3 PE=1 SV=2	8.65	47.5	5	1.10198	0.37093	7.34	42.5	5	1.07422	0.437786	7.63	37.5	4	1.0171	0.819591	1.06443	0.0432818
tr|G3V6R7|G3V6R7_RAT	3-oxoacyl-[acyl-carrier-protein] synthase, mitochondrial OS=Rattus norvegicus GN=Oxsm PE=1 SV=1	4.16	30.7	2	0.957854	0	8.06	35.75	4	1.25511	0.0875158	8.67	35.75	4	0.980578	0.864032	1.06451	0.165451
sp|Q5XIF6|TBA4A_RAT	Tubulin alpha-4A chain OS=Rattus norvegicus GN=Tuba4a PE=1 SV=1	52.81	66.74	30	1.08779	0.268819	56.02	66.74	34	1.15731	0.0871686	57.21	68.3	35	0.948479	0.718633	1.06453	0.106343
tr|M0R7R2|M0R7R2_RAT	Similar to Protein C6orf203 OS=Rattus norvegicus GN=LOC683897 PE=1 SV=1	4.26	29.25	3	1.01171	0.884745	4.14	40.71	3	0.992904	0.974294	4.94	30.83	3	1.18961	0.447856	1.06474	0.108546
tr|A0A0G2K4M6|A0A0G2K4M6_RAT	Actin, aortic smooth muscle OS=Rattus norvegicus GN=Acta2 PE=3 SV=1	49.41	61.97	26	1.00557	0.981372	55.18	62.77	30	1.06694	0.699545	56.25	69.41	30	1.12203	0.319005	1.06484	0.0582578
tr|F1LP76|F1LP76_RAT	Elongator complex protein 1 OS=Rattus norvegicus GN=Elp1 PE=1 SV=2	12.01	11.27	6	1.02274	0.753107	16.76	19.46	8	1.11963	0.573958	10.51	16	5	1.05438	0.896545	1.06558	0.0494046
sp|Q02356|AMPD2_RAT	AMP deaminase 2 OS=Rattus norvegicus GN=Ampd2 PE=1 SV=2	23.35	36.53	11	1.01143	0.911197	29.78	40.17	15	1.09626	0.427182	32.43	47.69	16	1.0898	0.541252	1.06583	0.0472208
sp|Q6AYT3|RTCB_RAT	tRNA-splicing ligase RtcB homolog OS=Rattus norvegicus GN=Rtcb PE=2 SV=1	11.41	35.25	6	1.0967	0.44845	23.25	47.33	12	1.00944	0.932751	27.26	44.95	15	1.09201	0.412046	1.06605	0.049081
tr|D4A520|D4A520_RAT	PTC7 protein phosphatase homolog OS=Rattus norvegicus GN=Pptc7 PE=1 SV=1	7.52	33.22	4	0.884716	0.296385	9.11	31.6	5	1.00603	0.950388	10	23.45	5	1.3074	0.22459	1.06605	0.217643
sp|P62959|HINT1_RAT	Histidine triad nucleotide-binding protein 1 OS=Rattus norvegicus GN=Hint1 PE=1 SV=5	10.34	63.49	5	1.00017	0.999414	15.63	81.75	8	1.08352	0.489823	14.13	79.37	7	1.11525	0.338786	1.06632	0.0594374
sp|P07335|KCRB_RAT	Creatine kinase B-type OS=Rattus norvegicus GN=Ckb PE=1 SV=2	41.5	77.17	25	1.14078	0.00871561	43.01	79	22	0.991121	0.873305	41.96	80.84	26	1.06823	0.218026	1.06671	0.074843
sp|Q4G075|ILEUA_RAT	Leukocyte elastase inhibitor A OS=Rattus norvegicus GN=Serpinb1a PE=1 SV=1	21.89	44.85	11	1.34665	0.00285747	29.68	50.66	14	0.975716	0.770444	36.65	54.09	18	0.878389	0.186652	1.06692	0.247094
sp|Q6XVN8|MLP3A_RAT	Microtubule-associated proteins 1A/1B light chain 3A OS=Rattus norvegicus GN=Map1lc3a PE=1 SV=1	3.28	36.36	2	1.14641	0	5.69	44.63	4	1.04411	0.737958	6.1	29.75	3	1.01035	0.93412	1.06696	0.0708511
sp|Q02769|FDFT_RAT	Squalene synthase OS=Rattus norvegicus GN=Fdft1 PE=2 SV=1	14.28	31.25	7	1.2209	0.0222794	18.86	37.74	9	0.990822	0.886277	12.67	34.38	6	0.989375	0.895022	1.06703	0.133254
tr|Q5FVF3|Q5FVF3_RAT	Golgi-associated, gamma adaptin ear-containing, ARF-binding protein 1 OS=Rattus norvegicus GN=Gga1 PE=1 SV=1	4.25	13.7	2	1.10853	0.792127	8.2	15.12	6	0.834902	0.162247	6.73	13.7	3	1.2577	0.749823	1.06704	0.214429
tr|A0A0G2K110|A0A0G2K110_RAT	Eukaryotic translation initiation factor 6 OS=Rattus norvegicus GN=Eif6 PE=1 SV=1	6.78	39.43	4	1.04479	0.836126	7.44	30.89	4	0.98161	0.943827	7.51	36.59	4	1.17491	0.179904	1.0671	0.0985604
sp|Q5U300|UBA1_RAT	Ubiquitin-like modifier-activating enzyme 1 OS=Rattus norvegicus GN=Uba1 PE=1 SV=1	65.92	40.74	33	1.13006	0.0230626	63.5	41.59	31	1.02327	0.427707	63.97	42.91	31	1.04853	0.217555	1.06729	0.0558112
sp|Q9QX69|LANC1_RAT	LanC-like protein 1 OS=Rattus norvegicus GN=Lancl1 PE=1 SV=2	9.35	27.82	5	1.12269	0.100802	12.46	30.08	6	0.97432	0.668849	15.97	32.33	8	1.10562	0.204706	1.06754	0.0811833
tr|G3V9P0|G3V9P0_RAT	26S proteasome non-ATPase regulatory subunit 9 OS=Rattus norvegicus GN=Psmd9 PE=1 SV=1	16.55	63.96	8	1.00827	0.892291	16	53.15	8	1.17747	0.352592	14.19	54.05	10	1.01734	0.887963	1.06769	0.0951749
tr|Q1RP74|Q1RP74_RAT	RCG53953, isoform CRA_a OS=Rattus norvegicus GN=LOC103690005 PE=1 SV=1	10.24	52.46	5	1.14878	0.107966	12.42	44.67	6	0.96024	0.679771	10.56	40.57	5	1.09493	0.63097	1.06798	0.0971157
sp|P09034|ASSY_RAT	Argininosuccinate synthase OS=Rattus norvegicus GN=Ass1 PE=1 SV=1	7.84	31.07	4	0.916571	0.77045	6.86	33.98	4	1.15749	0.558384	7.15	32.77	5	1.1302	0.469735	1.06809	0.131922
sp|B2RYG6|OTUB1_RAT	Ubiquitin thioesterase OTUB1 OS=Rattus norvegicus GN=Otub1 PE=1 SV=1	19.93	45.76	10	1.00884	0.901207	21.79	50.92	12	1.08161	0.134967	20.69	58.3	11	1.11547	0.380685	1.06864	0.0544841
tr|G3V888|G3V888_RAT	ATP-citrate synthase OS=Rattus norvegicus GN=Acly PE=1 SV=1	81.14	49.41	39	1.17765	0.000245695	92.93	51.32	47	1.01984	0.502548	84.78	50.95	43	1.00869	0.896582	1.06872	0.0944937
tr|D3ZQ57|D3ZQ57_RAT	Plexin B2 OS=Rattus norvegicus GN=Plxnb2 PE=1 SV=1	11.08	21.46	8	1.03692	0.794672	12.8	19.17	7	1.03438	0.781054	10.94	17.06	7	1.13507	0.48051	1.06879	0.0574154
sp|Q6P9U8|EIF3H_RAT	Eukaryotic translation initiation factor 3 subunit H OS=Rattus norvegicus GN=Eif3h PE=1 SV=1	8.05	30.68	4	1.0738	0.662939	8.57	27.56	4	0.931539	0.418036	12.08	38.92	6	1.20162	0.478802	1.06898	0.135104
tr|A0A0H2UHZ6|A0A0H2UHZ6_RAT	Poly(U)-binding-splicing factor PUF60 OS=Rattus norvegicus GN=Puf60 PE=1 SV=1	10.38	29.84	6	0.990855	0.975828	8.62	27.35	4	1.14464	0.624162	9.32	17.76	5	1.07149	0.832208	1.06899	0.0769228
sp|P07150|ANXA1_RAT	Annexin A1 OS=Rattus norvegicus GN=Anxa1 PE=1 SV=2	34.33	73.99	17	0.910913	0.251773	32.41	71.68	16	0.894743	0.330352	40.97	80.64	20	1.40139	0.000792666	1.06901	0.287957
tr|A0A0G2K7W7|A0A0G2K7W7_RAT	Glycogen synthase kinase-3 alpha OS=Rattus norvegicus GN=Gsk3a PE=1 SV=1	12.62	38.67	6	1.1153	0.323516	12.15	34.72	6	1.01426	0.881922	14.49	42.62	7	1.07789	0.512107	1.06915	0.0510838
tr|D4A2G9|D4A2G9_RAT	RAN-binding protein 1 OS=Rattus norvegicus GN=Ranbp1 PE=1 SV=1	11.53	60.1	6	1.26836	0.00793569	11.75	49.75	6	0.958531	0.551972	12.97	49.75	7	0.98145	0.753177	1.06945	0.172645
sp|O35142|COPB2_RAT	Coatomer subunit beta' OS=Rattus norvegicus GN=Copb2 PE=1 SV=3	36.28	40.66	18	0.906026	0.530841	25.86	34.92	13	1.06441	0.812851	34.25	42.21	17	1.2381	0.370103	1.06951	0.166098
tr|Q498N4|Q498N4_RAT	Phosphatidylinositol binding clathrin assembly protein, isoform CRA_c OS=Rattus norvegicus GN=Picalm PE=1 SV=1	25.36	39.1	13	1.02569	0.675705	25.25	32.77	12	1.10216	0.150005	20.23	35.39	10	1.08125	0.564883	1.0697	0.0395225
tr|V9GZ87|V9GZ87_RAT	CDC42 small effector protein 2 OS=Rattus norvegicus GN=LOC100362023 PE=1 SV=1	2	22.62	2	1.276	0	4	66.67	2	0.945281	0.772138	4.01	73.81	2	0.988249	0.926413	1.06984	0.179825
sp|Q5M823|NUDC2_RAT	NudC domain-containing protein 2 OS=Rattus norvegicus GN=Nudcd2 PE=2 SV=1	9.23	43.31	5	0.928877	0.712631	11.36	43.31	6	1.26379	0.0692308	4	24.2	3	1.0197	0.949561	1.07079	0.173204
tr|Q6AYI1|Q6AYI1_RAT	DEAD (Asp-Glu-Ala-Asp) box polypeptide 5 OS=Rattus norvegicus GN=Ddx5 PE=1 SV=1	29.69	44.23	14	0.998087	0.985631	25.46	43.74	12	1.14399	0.0255398	28.13	42.6	13	1.07095	0.6537	1.07101	0.072952
sp|D3ZAA9|MPP2_RAT	MAGUK p55 subfamily member 2 OS=Rattus norvegicus GN=Mpp2 PE=1 SV=2	22.42	56.88	11	0.969243	0.845567	17.06	54.53	8	1.11516	0.367136	23.44	47.64	11	1.12889	0.23705	1.0711	0.0884776
tr|F1LP30|F1LP30_RAT	Methylcrotonoyl-CoA carboxylase subunit alpha, mitochondrial OS=Rattus norvegicus GN=Mccc1 PE=1 SV=1	7.92	27.13	5	1.08645	0.602142	11.96	31.19	6	0.892383	0.693045	11.34	32.87	6	1.23451	0.608376	1.07111	0.171577
sp|Q5HZE4|MTNA_RAT	Methylthioribose-1-phosphate isomerase OS=Rattus norvegicus GN=Mri1 PE=1 SV=1	7.3	40.38	4	1.25505	0.0382837	12.02	43.9	7	1.26044	0.10792	11.34	41.46	6	0.698247	0.194061	1.07125	0.323039
sp|A1L108|ARP5L_RAT	Actin-related protein 2/3 complex subunit 5-like protein OS=Rattus norvegicus GN=Arpc5l PE=1 SV=2	8.66	73.2	4	1.16978	0.0887589	10.53	72.55	5	0.968483	0.697433	6.96	42.48	4	1.07617	0.594964	1.07148	0.100731
sp|Q66H15|RMD3_RAT	Regulator of microtubule dynamics protein 3 OS=Rattus norvegicus GN=Rmdn3 PE=1 SV=1	7.74	28.87	4	1.06062	0.658261	10.31	37.37	5	1.08131	0.322337	10.08	29.09	5	1.07272	0.512867	1.07155	0.0103912
tr|Q56R18|Q56R18_RAT	Importin subunit alpha OS=Rattus norvegicus GN=Kpna3 PE=1 SV=1	7.25	21.69	4	1.04537	0.824726	6.1	16.51	3	1.23009	0.134196	6.31	27.45	3	0.939268	0.751815	1.07158	0.147171
sp|P13264|GLSK_RAT	Glutaminase kidney isoform, mitochondrial OS=Rattus norvegicus GN=Gls PE=1 SV=2	32.44	55.64	15	1.20681	0.0814336	39.23	66.47	19	0.998123	0.981868	36.11	52.67	18	1.01069	0.881727	1.07187	0.117027
sp|Q9JJ54|HNRPD_RAT	Heterogeneous nuclear ribonucleoprotein D0 OS=Rattus norvegicus GN=Hnrnpd PE=1 SV=2	15.08	42.21	8	0.964144	0.746709	15.1	38.24	8	1.24264	0.108336	15.05	35.98	8	1.00898	0.957712	1.07192	0.149539
tr|G3V9Y1|G3V9Y1_RAT	Myosin, heavy polypeptide 10, non-muscle, isoform CRA_b OS=Rattus norvegicus GN=Myh10 PE=1 SV=1	120.76	57.74	64	1.17587	0.0600194	113.96	55.16	61	1.01067	0.855494	122.38	59.46	65	1.02928	0.710382	1.07194	0.0904849
tr|B5DFN1|B5DFN1_RAT	Eukaryotic translation initiation factor 1B OS=Rattus norvegicus GN=Eif1b PE=2 SV=1	5.96	35.4	3	0.985724	0.90823	6	35.4	3	0.899393	0.478064	4.01	71.68	2	1.33071	0	1.07194	0.228219
sp|Q4V7D2|ROGDI_RAT	Protein rogdi homolog OS=Rattus norvegicus GN=Rogdi PE=2 SV=1	10.55	55.4	6	0.965761	0.590765	14.08	56.45	7	1.32294	0.747712	10.46	76.66	5	0.927307	0.420705	1.072	0.21817
tr|O88768|O88768_RAT	ArfGAP with dual PH domains 1 OS=Rattus norvegicus GN=Adap1 PE=2 SV=1	12.87	48.66	6	1.29503	0.0374101	15.38	62.3	7	0.954109	0.640906	17.87	53.21	9	0.967053	0.728705	1.07207	0.193205
tr|F1MAR6|F1MAR6_RAT	Proline dehydrogenase OS=Rattus norvegicus GN=Prodh1 PE=1 SV=2	21.25	38.4	11	0.959271	0.531416	11.41	33.72	7	1.37572	0.191692	12.57	35.89	8	0.88303	0.411534	1.07267	0.2652
sp|P39069|KAD1_RAT	Adenylate kinase isoenzyme 1 OS=Rattus norvegicus GN=Ak1 PE=1 SV=3	24.34	69.07	15	1.01583	0.948034	30.68	78.87	16	1.08173	0.726543	26.01	84.02	14	1.12069	0.0745199	1.07275	0.0530074
tr|A0A0H2UHI7|A0A0H2UHI7_RAT	ATPase family AAA domain-containing protein 1 OS=Rattus norvegicus GN=Atad1 PE=1 SV=1	7.64	37.47	4	1.1873	0.341305	13.03	32.75	7	0.914195	0.374143	9.65	34.99	5	1.11687	0.339826	1.07279	0.141789
tr|D4AC23|D4AC23_RAT	Chaperonin-containing TCP1 subunit 7 OS=Rattus norvegicus GN=Cct7 PE=1 SV=1	44.32	56.8	22	1.05657	0.31938	48.63	59.01	24	1.05768	0.701811	51.62	65.44	25	1.10412	0.457746	1.07279	0.0271354
sp|P54921|SNAA_RAT	Alpha-soluble NSF attachment protein OS=Rattus norvegicus GN=Napa PE=1 SV=2	38.23	79.66	19	1.03454	0.404274	36.74	74.58	19	1.07852	0.292528	34.67	69.83	17	1.1055	0.139836	1.07285	0.035818
sp|P29419|ATP5I_RAT	ATP synthase subunit e, mitochondrial OS=Rattus norvegicus GN=Atp5i PE=1 SV=3	6.98	81.69	4	1.25804	0.847174	6.85	90.14	4	0.977717	0.890782	7.4	76.06	4	0.984243	0.879705	1.07333	0.159992
sp|Q9EPC6|PROF2_RAT	Profilin-2 OS=Rattus norvegicus GN=Pfn2 PE=1 SV=3	16	43.57	8	1.04691	0.69784	15.66	57.14	8	1.07262	0.525603	16	45.71	8	1.10107	0.424546	1.07353	0.0270935
sp|P42335|IP3KB_RAT	Inositol-trisphosphate 3-kinase B OS=Rattus norvegicus GN=Itpkb PE=1 SV=3	6.6	28.37	4	1.02332	0.916091	3.59	24.2	2	1.23496	0.733891	8.39	25.37	5	0.963066	0.667159	1.07378	0.142797
tr|F1LZJ4|F1LZJ4_RAT	Putative hydroxypyruvate isomerase OS=Rattus norvegicus GN=Hyi PE=1 SV=2	6.1	35.38	3	1.07471	0.617137	8.04	38.63	4	1.16387	0.355614	8.15	44.77	4	0.982941	0.801933	1.07384	0.0904662
tr|D3ZYM7|D3ZYM7_RAT	LYR motif-containing 4 OS=Rattus norvegicus GN=Lyrm4 PE=1 SV=1	4.25	73.63	4	0.96252	0.844903	4.33	68.13	3	1.24616	0.115292	5.08	48.35	3	1.01297	0.888902	1.07388	0.151314
sp|Q9WUS0|KAD4_RAT	Adenylate kinase 4, mitochondrial OS=Rattus norvegicus GN=Ak4 PE=2 SV=1	11.74	41.7	6	0.975335	0.824231	16.58	53.36	9	1.03067	0.853328	11.63	60.99	6	1.21595	0.0898896	1.07398	0.126019
sp|Q9Z1X1|ESYT1_RAT	Extended synaptotagmin-1 OS=Rattus norvegicus GN=Esyt1 PE=1 SV=1	31.27	42.37	15	0.996615	0.9591	38.43	37.96	19	1.07442	0.330983	23.92	35.2	13	1.15122	0.0720864	1.07409	0.0773036
tr|A0A0G2JUX5|A0A0G2JUX5_RAT	Transcriptional activator protein Pur-beta OS=Rattus norvegicus GN=Purb PE=1 SV=1	14.71	41.01	8	1.007	0.952922	16.63	53	8	1.10387	0.676543	15.89	44.48	9	1.11156	0.277068	1.07414	0.058273
tr|D4A5K6|D4A5K6_RAT	Zinc metallopeptidase STE24 OS=Rattus norvegicus GN=Zmpste24 PE=1 SV=1	4.43	12.42	3	1.07349	0.653519	3.73	14.11	2	1.10692	0.494243	4.14	20	3	1.04243	0.752218	1.07428	0.0322533
sp|P62963|PROF1_RAT	Profilin-1 OS=Rattus norvegicus GN=Pfn1 PE=1 SV=2	20	74.29	11	1.07261	0.24312	21.71	74.29	12	0.989069	0.865132	23.22	75.71	13	1.16157	0.0350838	1.07442	0.0862656
tr|D3ZI16|D3ZI16_RAT	COP9 (Constitutive photomorphogenic) homolog, subunit 6 (Arabidopsis thaliana) (Predicted), isoform CRA_a OS=Rattus norvegicus GN=Cops6 PE=1 SV=1	10.65	28.2	5	1.13705	0.167265	11.71	35.17	6	1.03548	0.637294	18.83	34.88	10	1.05082	0.404976	1.07445	0.0547533
tr|D3ZRM5|D3ZRM5_RAT	RAB23, member RAS oncogene family OS=Rattus norvegicus GN=Rab23 PE=4 SV=1	18.04	75.53	10	0.97633	0.783404	15.28	54.43	8	1.27551	0.384912	13.48	75.11	7	0.974514	0.837797	1.07545	0.17326
tr|A0A0G2K6Q5|A0A0G2K6Q5_RAT	Guanine nucleotide-binding protein-like 1 OS=Rattus norvegicus GN=Gnl1 PE=1 SV=1	8.46	26.73	5	1.21135	0.0830514	8.99	22.44	4	1.04543	0.528021	14.06	31.35	7	0.969657	0.917793	1.07548	0.123619
sp|Q63633|S12A5_RAT	Solute carrier family 12 member 5 OS=Rattus norvegicus GN=Slc12a5 PE=1 SV=2	45.87	30.64	24	1.08912	0.329425	42.26	31.52	20	1.11158	0.0112898	44.19	32.22	23	1.02595	0.695615	1.07555	0.0443977
tr|Q8R490|Q8R490_RAT	Cadherin 13 OS=Rattus norvegicus GN=Cdh13 PE=1 SV=1	5.05	20.17	3	1.01136	0.871223	5.3	18.35	3	1.1078	0.345357	4	7.283	3	1.10763	0.491433	1.0756	0.0556303
sp|Q58FK9|KAT3_RAT	Kynurenine--oxoglutarate transaminase 3 OS=Rattus norvegicus GN=Kyat3 PE=2 SV=1	11.06	20.7	7	0.868989	0.758081	11.51	29.07	6	1.17036	0.201821	9.57	20.26	5	1.18755	0.264777	1.07563	0.179165
tr|G3V8L9|G3V8L9_RAT	Polymerase I and transcript release factor OS=Rattus norvegicus GN=Cavin1 PE=1 SV=1	16.51	35.2	8	0.835043	0.465373	19.55	37.5	11	1.03238	0.507887	19.36	42.35	11	1.35977	0.00693054	1.07573	0.265036
tr|B2RZ27|B2RZ27_RAT	SH3 domain binding glutamic acid-rich protein-like 3 OS=Rattus norvegicus GN=Sh3bgrl3 PE=1 SV=1	4.38	39.78	3	1.01005	0.940205	5.59	32.26	3	0.999369	0.996769	6.28	59.14	4	1.21868	0.240447	1.07603	0.12365
sp|Q62658|FKB1A_RAT	Peptidyl-prolyl cis-trans isomerase FKBP1A OS=Rattus norvegicus GN=Fkbp1a PE=1 SV=3	7.29	51.85	4	1.22213	0.30155	10.23	51.85	5	0.963311	0.849533	8.24	38.89	4	1.0429	0.802507	1.07611	0.132566
tr|A0A0G2K5F1|A0A0G2K5F1_RAT	LRP16 protein OS=Rattus norvegicus GN=Macrod1 PE=1 SV=1	5.6	41.8	3	1.20215	0.325876	5.61	23.84	4	1.06131	0.978787	4.27	39.94	2	0.964918	0.784456	1.07613	0.11931
tr|D4A264|D4A264_RAT	Zinc-binding alcohol dehydrogenase, domain-containing 2 OS=Rattus norvegicus GN=Zadh2 PE=1 SV=2	7.68	33.16	4	1.04659	0.468306	9.44	36.34	5	1.15829	0.469154	10.17	35.01	5	1.02438	0.720723	1.07642	0.0717674
sp|Q63564|SV2B_RAT	Synaptic vesicle glycoprotein 2B OS=Rattus norvegicus GN=Sv2b PE=1 SV=1	7.66	14.64	4	0.714744	0	6.19	16.54	3	1.36517	0.108133	8.72	12.59	5	1.14959	0.230375	1.0765	0.331317
sp|Q7TP52|CMBL_RAT	Carboxymethylenebutenolidase homolog OS=Rattus norvegicus GN=Cmbl PE=2 SV=1	7.89	25.71	5	1.056	0.605185	7.75	38.37	6	1.00268	0.983381	6.51	31.43	4	1.17098	0.190107	1.07655	0.0860132
tr|M0R907|M0R907_RAT	RCG60635, isoform CRA_b OS=Rattus norvegicus GN=Snrpd3 PE=1 SV=1	3.28	26.19	2	1.00408	0.991928	4	31.75	2	0.884692	0.863521	4	33.33	2	1.34118	0.365017	1.07665	0.236741
sp|Q99MC0|PP14A_RAT	Protein phosphatase 1 regulatory subunit 14A OS=Rattus norvegicus GN=Ppp1r14a PE=1 SV=1	8.15	57.14	5	1.08666	0.496849	7.46	41.5	4	1.06514	0.393787	12.28	62.59	7	1.0783	0.753874	1.0767	0.010849
tr|D3ZEV8|D3ZEV8_RAT	Sushi domain containing 2 (Predicted), isoform CRA_a OS=Rattus norvegicus GN=Susd2 PE=1 SV=1	17.46	29.76	9	1.03102	0.769373	15.66	30.12	8	1.07869	0.304457	17.27	25.12	9	1.12061	0.362006	1.07677	0.0448264
sp|P11980|KPYM_RAT	Pyruvate kinase PKM OS=Rattus norvegicus GN=Pkm PE=1 SV=3	76.25	81.17	38	1.1643	0.378247	85.16	76.84	44	0.97697	0.729301	80.63	78.91	40	1.08943	0.529062	1.0769	0.0942911
sp|P85973|PNPH_RAT	Purine nucleoside phosphorylase OS=Rattus norvegicus GN=Pnp PE=1 SV=1	20.06	68.86	10	1.06882	0.21656	20.34	74.74	10	0.916114	0.146137	22.06	79.58	11	1.24609	0.00117464	1.07701	0.165138
sp|Q5I0E7|TMED9_RAT	Transmembrane emp24 domain-containing protein 9 OS=Rattus norvegicus GN=Tmed9 PE=1 SV=1	7.2	26.38	5	1.06746	0.648528	10.04	29.79	5	1.08565	0.44233	8.89	35.32	5	1.07938	0.472973	1.0775	0.00923848
tr|D3ZCR3|D3ZCR3_RAT	High-mobility group (nonhistone chromosomal) protein 1-like 1 OS=Rattus norvegicus GN=LOC108349189 PE=4 SV=2	15.41	46.48	8	0.910514	0.490901	20.44	56.81	10	1.09978	0.237575	20.38	41.31	11	1.22246	0.631314	1.07758	0.157154
sp|P10888|COX41_RAT	Cytochrome c oxidase subunit 4 isoform 1, mitochondrial OS=Rattus norvegicus GN=Cox4i1 PE=1 SV=1	21.26	76.33	11	1.05984	0.471638	21.73	63.91	10	1.15351	0.0924229	21.47	73.37	11	1.01942	0.832551	1.07759	0.0687854
sp|P07895|SODM_RAT	Superoxide dismutase [Mn], mitochondrial OS=Rattus norvegicus GN=Sod2 PE=1 SV=2	22.9	67.57	12	1.03635	0.853112	18.03	55.86	10	1.119	0.322556	22.07	69.37	13	1.07744	0.393737	1.0776	0.0413287
tr|G3V846|G3V846_RAT	Amino acid transporter OS=Rattus norvegicus GN=Slc1a3 PE=1 SV=1	11.85	25.05	6	1.06187	0.775152	16	24.31	8	1.09558	0.287071	15.68	20.81	8	1.07565	0.644772	1.0777	0.0169487
sp|P04785|PDIA1_RAT	Protein disulfide-isomerase OS=Rattus norvegicus GN=P4hb PE=1 SV=2	40.61	48.53	19	1.06636	0.0947345	43.83	54.03	21	1.02982	0.734632	43.15	60.31	20	1.13722	0.163309	1.0778	0.0546047
tr|A0A0G2JZF6|A0A0G2JZF6_RAT	NADH:ubiquinone oxidoreductase complex assembly factor 2 OS=Rattus norvegicus GN=Ndufaf2 PE=1 SV=1	5.31	43.37	3	1.11215	0.278033	2.38	42.17	2	1.22989	0.511621	4.04	59.64	2	0.891967	0	1.078	0.171531
tr|F1LNF0|F1LNF0_RAT	Myosin heavy chain 14 OS=Rattus norvegicus GN=Myh14 PE=1 SV=1	85.91	52	46	1.20369	0.0236017	88.98	55	47	0.961617	0.587427	96.78	54.55	49	1.06874	0.458451	1.07802	0.121303
tr|B0K010|B0K010_RAT	Thioredoxin domain-containing 17 OS=Rattus norvegicus GN=Txndc17 PE=1 SV=1	6	30.89	3	1.04458	0.739152	3.25	26.02	2	1.09858	0.515884	4	30.89	2	1.09122	0.540033	1.07813	0.0292836
tr|D3ZUX5|D3ZUX5_RAT	MICOS complex subunit OS=Rattus norvegicus GN=Chchd3 PE=1 SV=1	18	56.39	9	0.995468	0.966333	18.91	71.37	10	1.14831	0.00853485	17.9	64.32	9	1.09114	0.282208	1.07831	0.0772252
sp|Q62733|LAP2_RAT	Lamina-associated polypeptide 2, isoform beta OS=Rattus norvegicus GN=Tmpo PE=1 SV=3	16.44	42.7	8	1.05624	0.502003	18.19	44.47	9	1.02472	0.898311	19.39	41.59	9	1.15464	0.259501	1.07854	0.0677663
tr|D3ZG43|D3ZG43_RAT	NADH dehydrogenase (Ubiquinone) Fe-S protein 3 (Predicted), isoform CRA_c OS=Rattus norvegicus GN=Ndufs3 PE=1 SV=1	20.05	42.8	10	1.0387	0.730768	26.55	48.11	13	1.15976	0.0785405	28.71	47.35	15	1.03718	0.762258	1.07855	0.0703378
sp|Q5PPI4|LAMP5_RAT	Lysosome-associated membrane glycoprotein 5 OS=Rattus norvegicus GN=Lamp5 PE=2 SV=1	3	13.57	2	1.07526	0.596296	3.57	18.21	2	1.14718	0.787542	4.16	12.5	3	1.01348	0.962165	1.07864	0.0669146
tr|G3V984|G3V984_RAT	Protein bassoon OS=Rattus norvegicus GN=Bsn PE=4 SV=1	20.38	24.84	19	1.03583	0.622302	32.87	28.22	21	0.940323	0.813241	26.89	25.32	18	1.25981	0.294364	1.07866	0.163995
tr|B2RYP4|B2RYP4_RAT	Sorting nexin 2 OS=Rattus norvegicus GN=Snx2 PE=1 SV=1	26.39	47.78	13	1.04332	0.404818	25.32	43.35	13	0.94411	0.244427	27.62	41.62	14	1.24859	0.210413	1.07868	0.15529
sp|Q5M876|ACY3_RAT	N-acyl-aromatic-L-amino acid amidohydrolase (carboxylate-forming) OS=Rattus norvegicus GN=Acy3 PE=1 SV=1	2.67	20.38	2	0.891687	0.912855	5.01	27.9	3	1.08215	0.711199	4.82	23.51	3	1.26282	0.256169	1.07889	0.185589
tr|F1LNY3|F1LNY3_RAT	Neural cell adhesion molecule 1 OS=Rattus norvegicus GN=Ncam1 PE=1 SV=2	55.77	54.04	29	1.02968	0.764835	56.17	50.83	30	1.18711	0.205599	55.49	45.37	28	1.02008	0.896537	1.07896	0.0937871
tr|G3V774|G3V774_RAT	F-box only protein 2 OS=Rattus norvegicus GN=Fbxo2 PE=4 SV=1	21.23	53.04	10	1.10853	0.255343	20.9	53.38	10	1.0626	0.268688	23.32	53.04	12	1.06599	0.239684	1.07904	0.0255961
sp|Q4V8H8|EHD2_RAT	EH domain-containing protein 2 OS=Rattus norvegicus GN=Ehd2 PE=1 SV=1	9.14	23.76	5	0.96195	0.816157	7.74	37.57	4	1.28235	0.327681	9.61	37.02	5	0.993132	0.989672	1.07914	0.17667
tr|G3V758|G3V758_RAT	Contactin-2 OS=Rattus norvegicus GN=Cntn2 PE=1 SV=1	39.26	37.6	21	1.08506	0.358806	30.02	34.42	15	1.13415	0.116418	30.25	35.58	15	1.01858	0.857344	1.07926	0.0580045
tr|Q6IN39|Q6IN39_RAT	Hsd17b4 protein OS=Rattus norvegicus GN=Hsd17b4 PE=1 SV=1	44.1	45.94	22	1.13752	0.26553	49.87	46.07	26	1.03675	0.62245	47.64	48.6	23	1.06371	0.465056	1.07933	0.0521667
tr|D3ZFY8|D3ZFY8_RAT	Ubiquitin-conjugating enzyme E2 variant 1-like OS=Rattus norvegicus GN=LOC100912618 PE=1 SV=1	8.75	55.78	6	1.04026	0.657628	12.84	66.67	7	1.05564	0.540787	11.81	65.31	8	1.14222	0.269118	1.07937	0.0549678
sp|Q64680|CP2D4_RAT	Cytochrome P450 2D4 OS=Rattus norvegicus GN=Cyp2d4 PE=2 SV=1	8.02	19.6	4	0.807906	0.425641	5.81	21.2	4	1.41332	0.145286	8.78	16.2	5	1.0172	0.913051	1.07947	0.307473
tr|F1LPC7|F1LPC7_RAT	Hepatoma-derived growth factor OS=Rattus norvegicus GN=Hdgf PE=1 SV=2	3.08	27.43	2	1.11758	0.468993	4.33	27.43	3	0.965823	0.715353	4.93	30.38	3	1.1552	0.217958	1.07953	0.100255
sp|P26453|BASI_RAT	Basigin OS=Rattus norvegicus GN=Bsg PE=1 SV=2	13.1	22.68	7	1.12245	0.238081	14.75	28.87	7	1.08086	0.367753	14.21	29.38	7	1.03657	0.718494	1.07996	0.0429465
sp|Q9JHL4|DBNL_RAT	Drebrin-like protein OS=Rattus norvegicus GN=Dbnl PE=1 SV=1	24.28	44.95	12	1.06642	0.716995	25.2	52.29	12	0.99622	0.986742	27.97	54.59	14	1.17763	0.399731	1.08009	0.0914723
tr|A0A0G2JUL7|A0A0G2JUL7_RAT	Septin 6 (Predicted), isoform CRA_b OS=Rattus norvegicus GN=Sept11 PE=1 SV=1	38.96	57.81	18	1.10793	0.757915	36.61	60.61	18	1.02179	0.875257	36.38	52.45	17	1.11105	0.129821	1.08026	0.050658
tr|B5DFG5|B5DFG5_RAT	RCG53214, isoform CRA_d OS=Rattus norvegicus GN=Sept6 PE=1 SV=1	30.45	53.63	14	1.0074	0.940752	26.7	58.31	14	1.18874	0.02041	25.15	44.5	12	1.04584	0.818722	1.08066	0.095552
tr|A0A0G2JSZ5|A0A0G2JSZ5_RAT	Protein disulfide-isomerase A6 OS=Rattus norvegicus GN=Pdia6 PE=1 SV=1	25.01	46.74	12	1.1332	0.188397	25.39	43.37	13	0.949293	0.449775	23.49	48.54	12	1.15957	0.130501	1.08069	0.114552
tr|A0A0G2KAJ7|A0A0G2KAJ7_RAT	Collagen alpha-1(XII) chain OS=Rattus norvegicus GN=Col12a1 PE=1 SV=1	15.34	24.18	10	1.02871	0.915055	16.75	27.2	11	1.07842	0.75108	19.73	27.65	11	1.13517	0.480435	1.08077	0.0532674
tr|B2RYS8|B2RYS8_RAT	NADH dehydrogenase [ubiquinone] 1 beta subcomplex subunit 8, mitochondrial OS=Rattus norvegicus GN=Ndufb8 PE=1 SV=1	6.31	42.47	4	1.01824	0.852334	4.7	33.33	3	1.21245	0.894362	4.84	51.08	3	1.01163	0.900835	1.08077	0.114082
sp|P23978|SC6A1_RAT	Sodium- and chloride-dependent GABA transporter 1 OS=Rattus norvegicus GN=Slc6a1 PE=1 SV=1	8.38	14.86	4	1.09037	0.294563	9.85	14.52	5	1.2057	0.0700237	9.09	17.03	5	0.946784	0.774002	1.08095	0.129712
sp|Q9EPB1|DPP2_RAT	Dipeptidyl peptidase 2 OS=Rattus norvegicus GN=Dpp7 PE=1 SV=1	10.18	24	5	1.09835	0.559573	9.36	19	4	1.05249	0.765245	9.65	19.8	5	1.09211	0.182807	1.08098	0.024873
sp|P62628|DLRB1_RAT	Dynein light chain roadblock-type 1 OS=Rattus norvegicus GN=Dynlrb1 PE=1 SV=3	6.01	67.71	3	1.09384	0.474302	6	51.04	4	1.05531	0.628325	6	60.42	4	1.09452	0.452122	1.08122	0.0224444
sp|Q8R4A1|ERO1A_RAT	ERO1-like protein alpha OS=Rattus norvegicus GN=Ero1a PE=1 SV=1	7.61	36.42	4	1.09419	0.665539	10.09	22.63	6	1.06595	0.478449	7.08	31.47	4	1.08362	0.574122	1.08126	0.0142669
tr|A0A0G2K677|A0A0G2K677_RAT	Spectrin beta chain OS=Rattus norvegicus GN=Sptbn4 PE=1 SV=1	23.88	29.01	15	1.24906	0.147145	30.65	34.32	17	1.05399	0.576311	22.76	32.33	14	0.940879	0.873489	1.08131	0.155895
sp|P37377|SYUA_RAT	Alpha-synuclein OS=Rattus norvegicus GN=Snca PE=1 SV=1	24.15	55.71	12	1.22939	0.0546152	26	62.14	13	0.979204	0.749695	22.5	62.14	12	1.03552	0.581437	1.08137	0.131242
sp|P63329|PP2BA_RAT	Serine/threonine-protein phosphatase 2B catalytic subunit alpha isoform OS=Rattus norvegicus GN=Ppp3ca PE=1 SV=1	35.64	43.38	18	1.13713	0.153634	41.69	53.93	24	1.09534	0.0897067	37.81	43.57	21	1.0117	0.845821	1.08139	0.0638689
tr|D3ZVB7|D3ZVB7_RAT	Osteoglycin OS=Rattus norvegicus GN=Ogn PE=1 SV=1	12.72	38.26	6	1.08458	0.554274	9.68	40.6	5	1.00969	0.864605	11.28	55.7	6	1.15173	0.685952	1.082	0.071057
tr|G3V7J2|G3V7J2_RAT	Interferon-inducible double-stranded RNA-dependent protein kinase activator A OS=Rattus norvegicus GN=Prkra PE=1 SV=1	7.71	35.78	4	1.02238	0.831503	5.84	39.94	3	1.09253	0.41766	4.13	27.8	2	1.13147	0.446251	1.08213	0.055285
tr|Q5I0F0|Q5I0F0_RAT	Developmentally-regulated GTP-binding protein 1 OS=Rattus norvegicus GN=Drg1 PE=1 SV=1	9.62	32.43	6	1.0309	0.683896	8.57	35.15	6	1.24459	0.273307	8.24	32.15	4	0.971851	0.751107	1.08244	0.143489
tr|B1WC34|B1WC34_RAT	Protein kinase C substrate 80K-H OS=Rattus norvegicus GN=Prkcsh PE=1 SV=1	21.62	34.67	11	0.929363	0.671701	21.2	30.48	10	1.07681	0.591433	19	37.33	9	1.24192	0.0433906	1.0827	0.156359
sp|Q68FR6|EF1G_RAT	Elongation factor 1-gamma OS=Rattus norvegicus GN=Eef1g PE=2 SV=3	26.38	38.44	13	1.10319	0.329638	30.58	47.6	16	1.031	0.825914	26.05	39.13	15	1.11416	0.385613	1.08279	0.0451817
sp|Q9Z0W5|PACN1_RAT	Protein kinase C and casein kinase substrate in neurons protein 1 OS=Rattus norvegicus GN=Pacsin1 PE=1 SV=1	49.57	68.93	24	1.07919	0.143134	42.07	68.03	20	1.11751	0.237938	40.09	64.85	18	1.05168	0.538885	1.08279	0.0330584
sp|Q9Z254|GIPC1_RAT	PDZ domain-containing protein GIPC1 OS=Rattus norvegicus GN=Gipc1 PE=1 SV=2	14.18	56.16	7	1.14499	0.743487	12.13	44.14	6	0.985837	0.862738	12.71	34.23	7	1.11757	0.56372	1.0828	0.0850829
tr|D3ZJ01|D3ZJ01_RAT	Similar to RIKEN cDNA 2310035C23 OS=Rattus norvegicus GN=RGD1307235 PE=1 SV=1	15.97	16.58	8	1.05761	0.3538	14.47	28.98	7	1.0734	0.367826	18.12	28.57	10	1.11823	0.349582	1.08308	0.0314482
sp|P35280|RAB8A_RAT	Ras-related protein Rab-8A OS=Rattus norvegicus GN=Rab8a PE=1 SV=2	18.27	63.29	9	1.19749	0.0960616	19.35	51.21	10	0.963054	0.82177	20.8	61.84	10	1.08915	0.31036	1.08323	0.117328
sp|P62762|VISL1_RAT	Visinin-like protein 1 OS=Rattus norvegicus GN=Vsnl1 PE=1 SV=2	33.09	89.53	17	1.17497	0.25419	37.33	91.1	20	1.04658	0.524343	35.61	87.43	18	1.02962	0.759163	1.08372	0.0794751
tr|F8WFH8|F8WFH8_RAT	Tryptophan--tRNA ligase, cytoplasmic OS=Rattus norvegicus GN=Wars PE=1 SV=1	41.26	66.74	21	1.14674	0.0141986	39.68	70.53	20	0.999052	0.985535	45.25	77.68	25	1.10615	0.143233	1.08398	0.0763003
sp|P50408|VATF_RAT	V-type proton ATPase subunit F OS=Rattus norvegicus GN=Atp6v1f PE=1 SV=1	7.01	39.5	4	1.04034	0.766204	7.04	48.74	4	1.11533	0.264051	6.17	44.54	3	1.09818	0.539463	1.08462	0.0392948
tr|A0A096MKG5|A0A096MKG5_RAT	NAD kinase 2, mitochondrial OS=Rattus norvegicus GN=Nadk2 PE=1 SV=1	17.67	48.67	9	1.27029	0.0648729	11.71	56.44	6	1.00911	0.886082	19.16	60.22	11	0.974788	0.782061	1.08473	0.161612
tr|G3V714|G3V714_RAT	Neuroendocrine protein 7B2 OS=Rattus norvegicus GN=Scg5 PE=1 SV=3	4.9	38.57	3	1.00048	0.997326	6.27	38.1	3	1.13626	0.348688	3.93	36.19	2	1.11756	0.269463	1.08477	0.0735896
tr|A2VD09|A2VD09_RAT	Abi1 protein OS=Rattus norvegicus GN=Abi1 PE=1 SV=1	8	25.99	4	1.02468	0.768386	14.31	29.73	8	1.00207	0.986796	10.23	36.8	5	1.22806	0.507027	1.08494	0.124463
sp|Q63327|MOBP_RAT	Myelin-associated oligodendrocyte basic protein OS=Rattus norvegicus GN=Mobp PE=1 SV=1	5.06	49.41	3	0.953438	0.953844	4.29	58.24	2	1.24343	0.45917	4.39	47.65	2	1.0582	0.860558	1.08502	0.146846
tr|A0A0G2K9A2|A0A0G2K9A2_RAT	Arp2/3 complex 34 kDa subunit OS=Rattus norvegicus GN=Arpc2 PE=1 SV=1	16.81	55.67	10	1.03032	0.650862	12.77	47.67	7	1.06226	0.637765	17.28	47.67	9	1.1629	0.469492	1.08516	0.0691909
tr|Q6PCT9|Q6PCT9_RAT	Proteasome (Prosome, macropain) 26S subunit, non-ATPase, 6 OS=Rattus norvegicus GN=Psmd6 PE=1 SV=1	15.11	52.44	8	1.1224	0.524496	13.03	52.96	6	1.06799	0.414847	16.77	44.47	10	1.0655	0.40994	1.08529	0.0321553
sp|P61149|FGF1_RAT	Fibroblast growth factor 1 OS=Rattus norvegicus GN=Fgf1 PE=1 SV=1	5.84	50.32	4	1.03924	0.692689	4.51	50.97	4	1.07068	0.418812	4.21	38.06	4	1.14597	0.129355	1.0853	0.0548445
tr|Q68FZ8|Q68FZ8_RAT	Propionyl coenzyme A carboxylase, beta polypeptide OS=Rattus norvegicus GN=Pccb PE=1 SV=1	21.84	46.95	11	1.14552	0.362396	32.09	48.43	16	1.07808	0.144175	26.5	47.69	14	1.03285	0.623404	1.08548	0.0567013
tr|B0BNE6|B0BNE6_RAT	NADH dehydrogenase (Ubiquinone) Fe-S protein 8 (Predicted), isoform CRA_a OS=Rattus norvegicus GN=Ndufs8 PE=1 SV=1	8.59	33.49	5	1.04496	0.669218	6.88	41.51	4	1.16121	0.117056	6.28	56.13	3	1.05049	0.665658	1.08555	0.065576
tr|Q6PDW1|Q6PDW1_RAT	40S ribosomal protein S12 OS=Rattus norvegicus GN=Rps12 PE=1 SV=1	14.39	62.12	7	1.11891	0.163602	13.97	81.06	8	0.93972	0.775544	13.81	71.97	7	1.19816	0.109088	1.0856	0.1324
tr|D4ABI7|D4ABI7_RAT	Very-long-chain (3R)-3-hydroxyacyl-CoA dehydratase OS=Rattus norvegicus GN=Hacd3 PE=1 SV=2	11.85	23.48	6	1.03834	0.647966	8.48	17.96	6	1.28178	0.354925	14.71	26.52	8	0.936869	0.766598	1.08566	0.177261
tr|F1M7W7|F1M7W7_RAT	NEDD8-activating enzyme E1 regulatory subunit OS=Rattus norvegicus GN=Nae1 PE=1 SV=3	10.55	27.53	5	1.09729	0.174245	9.01	40.26	4	1.14087	0.444885	10.12	30.34	5	1.02019	0.799258	1.08612	0.0611132
tr|Q5PPJ6|Q5PPJ6_RAT	Leucyl-tRNA synthetase OS=Rattus norvegicus GN=Lars PE=1 SV=1	28.9	30.05	15	0.903224	0.533943	26.31	35.48	14	1.11406	0.188467	22.66	27.25	11	1.24198	0.116961	1.08642	0.171063
sp|Q6QIX3|ZNT3_RAT	Zinc transporter 3 OS=Rattus norvegicus GN=Slc30a3 PE=1 SV=1	7.59	31.96	4	1.12273	0.335789	10.02	35.57	5	1.15422	0.281595	8.86	24.74	5	0.982922	0.862051	1.08662	0.0911784
tr|Q6MG85|Q6MG85_RAT	1-acyl-sn-glycerol-3-phosphate acyltransferase OS=Rattus norvegicus GN=Agpat1 PE=1 SV=1	4.02	26.76	3	1.28718	0.179556	8.37	29.93	5	0.989074	0.887466	7.88	26.76	4	0.983845	0.899278	1.0867	0.17364
sp|Q8CG45|ARK72_RAT	Aflatoxin B1 aldehyde reductase member 2 OS=Rattus norvegicus GN=Akr7a2 PE=1 SV=2	11.57	47.96	5	1.22914	0.150432	20.35	53.95	11	1.01023	0.921047	18.01	46.87	9	1.02108	0.795334	1.08682	0.123375
sp|P63045|VAMP2_RAT	Vesicle-associated membrane protein 2 OS=Rattus norvegicus GN=Vamp2 PE=1 SV=2	11.03	48.28	6	1.11527	0.652937	11.35	45.69	6	0.864725	0.408079	10.09	45.69	5	1.2805	0.26012	1.08683	0.20934
tr|A0A0G2K0X9|A0A0G2K0X9_RAT	Protein transport protein Sec31A OS=Rattus norvegicus GN=Sec31a PE=1 SV=1	30.71	28.04	16	1.063	0.548574	35.65	29.93	19	1.10893	0.354726	33.13	35.44	17	1.09045	0.622369	1.08746	0.0231137
tr|Q7TQ77|Q7TQ77_RAT	Ac1288 OS=Rattus norvegicus GN=Hook3 PE=1 SV=1	6.05	29.34	3	0.805978	0.441198	4.74	31.59	2	1.30238	0.457221	5.42	27.08	3	1.1541	0.421622	1.08749	0.25482
sp|P38718|MPC2_RAT	Mitochondrial pyruvate carrier 2 OS=Rattus norvegicus GN=Mpc2 PE=2 SV=1	4.12	40.94	2	1.15753	0.416925	5.66	52.76	4	1.14215	0.85471	7.66	45.67	4	0.96287	0.954881	1.08752	0.108222
tr|F1LPB9|F1LPB9_RAT	Rabphilin-3A OS=Rattus norvegicus GN=Rph3a PE=1 SV=1	27.34	57.16	15	1.13311	0.106025	30.85	56.73	16	1.05076	0.441531	29.94	57.75	15	1.07976	0.406218	1.08788	0.04177
sp|Q63396|TCP4_RAT	Activated RNA polymerase II transcriptional coactivator p15 OS=Rattus norvegicus GN=Sub1 PE=1 SV=3	5.65	35.43	3	1.07351	0.675162	4.12	56.69	3	1.19364	0.333908	5.51	74.02	4	0.997796	0.984045	1.08832	0.0987564
sp|Q641Y0|OST48_RAT	Dolichyl-diphosphooligosaccharide--protein glycosyltransferase 48 kDa subunit OS=Rattus norvegicus GN=Ddost PE=2 SV=1	14.41	25.17	8	1.03987	0.854977	13.95	25.62	7	1.02044	0.775349	11.88	31.97	6	1.20486	0.0287004	1.08839	0.101334
tr|Q4V8H5|Q4V8H5_RAT	Aspartyl aminopeptidase OS=Rattus norvegicus GN=Dnpep PE=1 SV=1	21.34	41.68	11	0.981011	0.785725	22.09	36	11	1.16936	0.169855	25.11	44	14	1.11581	0.297611	1.08873	0.0970512
sp|Q5RKI1|IF4A2_RAT	Eukaryotic initiation factor 4A-II OS=Rattus norvegicus GN=Eif4a2 PE=1 SV=1	32.41	46.44	16	1.02475	0.68727	31.37	63.88	17	1.03691	0.820228	32.51	63.39	16	1.20465	0.261998	1.08877	0.100537
tr|D3ZLM5|D3ZLM5_RAT	NHL repeat containing 2 (Predicted) OS=Rattus norvegicus GN=Nhlrc2 PE=1 SV=1	4	12.69	2	0.962939	0.788847	4.67	14.21	3	0.961261	0.678102	3.58	16.28	2	1.3437	0.0808984	1.0893	0.220318
tr|B5DF55|B5DF55_RAT	RCG55706 OS=Rattus norvegicus GN=Stam PE=1 SV=1	12.36	24.68	6	0.994802	0.976478	15.31	29.43	7	1.27033	0.200832	13.9	27.61	7	1.00314	0.978367	1.08942	0.156723
sp|Q63488|S20A2_RAT	Sodium-dependent phosphate transporter 2 OS=Rattus norvegicus GN=Slc20a2 PE=1 SV=1	5.81	13.41	3	0.911186	0.752838	6	12.96	3	1.07474	0.630665	5.86	16.92	3	1.28253	0.865263	1.08949	0.186113
tr|B4F7C7|B4F7C7_RAT	Hebp1 protein OS=Rattus norvegicus GN=Hebp1 PE=1 SV=1	8.01	38.95	4	0.882944	0.478425	8	32.11	4	1.25843	0.26328	8.72	53.16	5	1.12751	0.485049	1.08963	0.190586
tr|D4A1G1|D4A1G1_RAT	Acylphosphatase OS=Rattus norvegicus GN=Acyp2 PE=1 SV=2	14.79	60.48	7	1.22258	0.0298856	14.95	69.35	8	1.03101	0.702172	14.85	61.29	8	1.01602	0.919078	1.08987	0.115176
tr|B2RZD1|B2RZD1_RAT	Protein transport protein Sec61 subunit beta OS=Rattus norvegicus GN=Sec61b PE=1 SV=1	3.29	53.13	2	1.10068	0.511268	4	40.63	2	1.0612	0.655506	2.97	35.42	2	1.1081	0.488081	1.08999	0.0252107
sp|Q2LAP6|TES_RAT	Testin OS=Rattus norvegicus GN=Tes PE=1 SV=1	3.19	29.12	2	0.793866	0.542506	2.66	30.79	2	1.21188	0.286489	3.6	23.63	2	1.26424	0.145042	1.08999	0.257787
sp|Q6Q629|DPP10_RAT	Inactive dipeptidyl peptidase 10 OS=Rattus norvegicus GN=Dpp10 PE=1 SV=1	4.62	15.95	3	0.96542	0.823543	7.33	27.14	4	1.19459	0.333878	8.5	24.37	5	1.11059	0.344919	1.0902	0.115937
tr|G3V6P8|G3V6P8_RAT	Guanine nucleotide-binding protein subunit gamma OS=Rattus norvegicus GN=Gng12 PE=1 SV=1	6.38	86.11	3	1.12281	0.409361	8.59	80.56	4	1.10601	0.308961	6.78	77.78	4	1.0425	0.682766	1.09044	0.0423583
sp|P19468|GSH1_RAT	Glutamate--cysteine ligase catalytic subunit OS=Rattus norvegicus GN=Gclc PE=1 SV=2	12.05	23.55	6	1.21492	0.476216	6.12	16.8	3	1.09496	0.713923	11.76	23.23	7	0.961991	0.813289	1.09062	0.126522
tr|D3ZZC1|D3ZZC1_RAT	RCG43947 OS=Rattus norvegicus GN=Txndc5 PE=1 SV=1	11.86	46.52	6	1.1727	0.141557	9.39	33.57	6	0.932109	0.440731	10.65	40.77	5	1.16741	0.103508	1.09074	0.137403
sp|P32851|STX1A_RAT	Syntaxin-1A OS=Rattus norvegicus GN=Stx1a PE=1 SV=1	6.14	46.18	4	1.11838	0.844621	7.4	36.81	4	1.14978	0.405696	5.5	30.21	3	1.00409	0.974212	1.09075	0.0766755
tr|A0A1W2Q6Q2|A0A1W2Q6Q2_RAT	Serine/threonine-protein kinase DCLK1 OS=Rattus norvegicus GN=Dclk1 PE=1 SV=1	21.71	34.51	10	1.09024	0.160207	26.02	42.49	13	1.00542	0.963078	31.96	47.23	17	1.17706	0.298548	1.09091	0.0858239
tr|D3ZZV1|D3ZZV1_RAT	Presequence translocase-associated motor 16 OS=Rattus norvegicus GN=Pam16 PE=1 SV=1	5.44	66.4	3	1.36688	0.705405	3	72.8	2	1.14413	0.300722	3.56	57.6	2	0.762438	0.197013	1.09115	0.305682
tr|G3V7L8|G3V7L8_RAT	ATPase, H+ transporting, V1 subunit E isoform 1, isoform CRA_a OS=Rattus norvegicus GN=Atp6v1e1 PE=1 SV=1	22.97	50	11	1.11976	0.315208	19.74	50	10	1.11468	0.135939	19.39	50	9	1.03948	0.675633	1.0913	0.0449513
tr|G3V9L3|G3V9L3_RAT	Dual-specificity phosphatase 3 OS=Rattus norvegicus GN=Dusp3 PE=1 SV=2	12.07	65.1	7	1.07513	0.316248	13.87	69.79	7	1.10677	0.509037	14	63.54	7	1.09208	0.216557	1.09133	0.015831
tr|A0A0A0MY09|A0A0A0MY09_RAT	Endoplasmin OS=Rattus norvegicus GN=Hsp90b1 PE=1 SV=1	64.48	54.48	32	1.16352	0.014348	71.65	56.97	35	0.911632	0.144085	65.54	56.09	33	1.19961	5.44804e-05	1.09159	0.156887
tr|D4ABS5|D4ABS5_RAT	PITH domain-containing 1 OS=Rattus norvegicus GN=Pithd1 PE=1 SV=2	5.52	72.88	3	1.11642	0.234277	8.07	60.17	4	1.07318	0.348011	8.04	60.17	4	1.08625	0.398909	1.09195	0.0221776
sp|Q6MG61|CLIC1_RAT	Chloride intracellular channel protein 1 OS=Rattus norvegicus GN=Clic1 PE=1 SV=1	9.84	36.93	5	1.09058	0.471093	8.07	58.51	4	0.925397	0.592373	10.18	41.49	6	1.25997	0.0166296	1.09198	0.167289
sp|P29066|ARRB1_RAT	Beta-arrestin-1 OS=Rattus norvegicus GN=Arrb1 PE=1 SV=1	15.25	39.71	8	1.22811	0.512689	20.3	54.78	10	1.01588	0.942086	17.08	36.36	9	1.03212	0.735435	1.09204	0.118125
tr|A0A0G2K0Q7|A0A0G2K0Q7_RAT	Myosin light chain kinase OS=Rattus norvegicus GN=Mylk PE=1 SV=1	11.93	21.31	8	1.29269	0.449669	10.48	26.43	6	0.961678	0.970031	14.95	25.2	10	1.02176	0.915599	1.09204	0.176345
sp|Q5XII0|EPDR1_RAT	Mammalian ependymin-related protein 1 OS=Rattus norvegicus GN=Epdr1 PE=2 SV=1	10	29.46	5	0.98623	0.845074	11.69	42.41	6	1.18742	0.0611685	10	34.38	5	1.10338	0.260385	1.09234	0.101046
sp|Q64303|PAK2_RAT	Serine/threonine-protein kinase PAK 2 OS=Rattus norvegicus GN=Pak2 PE=1 SV=1	20.18	44.08	9	1.04268	0.528667	30.1	44.08	16	1.05442	0.812006	33.2	54.01	18	1.18022	0.385102	1.09244	0.0762459
sp|P04094|PENK_RAT	Proenkephalin-A OS=Rattus norvegicus GN=Penk PE=1 SV=1	8.08	35.32	4	0.991944	0.925994	10.01	37.55	6	1.19585	0.138131	8	40.89	4	1.08982	0.641181	1.09254	0.10198
sp|Q9JLA3|UGGG1_RAT	UDP-glucose:glycoprotein glucosyltransferase 1 OS=Rattus norvegicus GN=Uggt1 PE=1 SV=2	17.97	20.44	11	1.14722	0.479634	15.86	22.63	11	1.03167	0.79365	28.08	27.92	15	1.09883	0.414026	1.09257	0.0580291
tr|A0A0G2K670|A0A0G2K670_RAT	Voltage-gated potassium channel subunit beta-2 OS=Rattus norvegicus GN=Kcnab2 PE=1 SV=1	30.43	59.53	15	1.13581	0.500948	25.31	51.7	11	1.1024	0.0959814	27.7	55.61	14	1.03965	0.489422	1.09262	0.0488186
tr|Q6AYU5|Q6AYU5_RAT	Poly(rC)-binding protein 2 OS=Rattus norvegicus GN=Pcbp2 PE=1 SV=1	13.77	27.12	7	1.11035	0.345095	15.29	46.3	9	1.08844	0.595265	16.03	53.97	9	1.07916	0.345043	1.09265	0.016016
sp|P60901|PSA6_RAT	Proteasome subunit alpha type-6 OS=Rattus norvegicus GN=Psma6 PE=1 SV=1	23.96	47.97	12	1.02575	0.609249	24.46	50.81	12	1.06241	0.463401	18.55	52.44	9	1.19157	0.139395	1.09325	0.0871033
sp|P04904|GSTA3_RAT	Glutathione S-transferase alpha-3 OS=Rattus norvegicus GN=Gsta3 PE=1 SV=3	16.85	51.58	8	1.08443	0.313809	18.74	52.04	10	1.08244	0.36804	15.81	41.63	8	1.11291	0.37557	1.09326	0.0170465
tr|F7FJQ3|F7FJQ3_RAT	NPC intracellular cholesterol transporter 2 OS=Rattus norvegicus GN=Npc2 PE=1 SV=1	6.35	41.45	3	1.19352	0.0634797	4.36	33.55	3	0.833178	0.330959	4.5	33.55	2	1.2537	0.039005	1.09346	0.227414
sp|P55067|NCAN_RAT	Neurocan core protein OS=Rattus norvegicus GN=Ncan PE=1 SV=1	19.38	21.24	10	1.03151	0.573426	22.91	24.34	12	1.06115	0.306588	24.34	24.82	13	1.18783	0.024948	1.0935	0.0830275
tr|Q4QQV0|Q4QQV0_RAT	Tubulin beta chain OS=Rattus norvegicus GN=Tubb6 PE=1 SV=1	44	52.57	24	0.85756	0.507878	44.08	59.28	25	1.34038	0.0795226	42	53.69	22	1.08337	0.601749	1.09377	0.241578
sp|Q1JU68|EIF3A_RAT	Eukaryotic translation initiation factor 3 subunit A OS=Rattus norvegicus GN=Eif3a PE=2 SV=2	26.44	46.6	13	0.98029	0.876656	22.75	41.36	13	1.09596	0.41023	30.58	42.69	17	1.20613	0.00433008	1.09413	0.112932
tr|A0A0G2K824|A0A0G2K824_RAT	Mannose-1-phosphate guanyltransferase alpha OS=Rattus norvegicus GN=Gmppa PE=1 SV=1	6.11	15.76	3	1.12483	0.495486	6.43	27.29	3	1.01204	0.928292	7.04	24.71	4	1.14602	0.171243	1.0943	0.0720172
tr|M0R809|M0R809_RAT	Guanine nucleotide-binding protein subunit gamma OS=Rattus norvegicus GN=Gng4 PE=3 SV=1	5.89	46.67	3	0.942041	0.668111	4.23	56	2	1.19142	0.337232	3.68	64	2	1.15033	0.260911	1.0946	0.133705
tr|A0A0G2JUA5|A0A0G2JUA5_RAT	AHNAK nucleoprotein OS=Rattus norvegicus GN=Ahnak PE=1 SV=1	126.87	60.18	87	0.835692	0.0136321	133.52	61.72	91	1.0203	0.738655	124.66	63.93	96	1.42829	6.33559e-06	1.09476	0.303235
tr|A0A0H2UHM5|A0A0H2UHM5_RAT	Protein disulfide-isomerase OS=Rattus norvegicus GN=Pdia3 PE=1 SV=1	68.45	70.78	34	1.10948	0.141064	70.52	76.67	36	1.00948	0.866463	62.89	78.82	32	1.16558	0.252757	1.09485	0.079071
tr|G3V9R9|G3V9R9_RAT	Afamin OS=Rattus norvegicus GN=Afm PE=1 SV=1	28.78	52.3	14	0.778278	0.504409	14.6	34.21	7	1.05412	0.895728	12.54	32.4	6	1.4524	0.711623	1.09493	0.338909
tr|Q6AY58|Q6AY58_RAT	B-cell receptor-associated protein 31 OS=Rattus norvegicus GN=Bcap31 PE=1 SV=1	15.86	45.71	9	1.44479	0.374382	17.86	45.71	10	0.898319	0.397334	19.3	46.12	9	0.941997	0.731715	1.09503	0.303681
tr|A0A0G2K9J2|A0A0G2K9J2_RAT	ATPase H+-transporting V1 subunit H OS=Rattus norvegicus GN=Atp6v1h PE=1 SV=1	30.05	49.9	14	1.11562	0.244677	35.82	61.9	18	1.19936	0.0445703	34.08	53.21	17	0.970308	0.830185	1.0951	0.115899
tr|D4A4D5|D4A4D5_RAT	Similar to 60S acidic ribosomal protein P2 OS=Rattus norvegicus GN=LOC498555 PE=3 SV=1	14.06	80.87	7	0.982462	0.97101	16.31	80.87	8	1.00287	0.989764	15.56	80.87	8	1.30006	0.105628	1.09513	0.177766
tr|B1WBY5|B1WBY5_RAT	DnaJ (Hsp40) homolog, subfamily C, member 11 OS=Rattus norvegicus GN=Dnajc11 PE=1 SV=1	9.4	41.14	5	0.936849	0.881039	7.81	32.38	4	1.18576	0.175563	5.93	33.09	3	1.16327	0.264686	1.09529	0.137675
tr|B1H2A6|B1H2A6_RAT	FMR1 autosomal homolog 2 OS=Rattus norvegicus GN=Fxr2 PE=1 SV=1	5.3	38.96	3	0.985307	0	5.02	26.22	2	1.11042	0.324196	4.88	32.3	2	1.19044	0.44384	1.09539	0.103389
tr|D4A4L5|D4A4L5_RAT	Iron-sulfur cluster assembly 2 OS=Rattus norvegicus GN=Isca2 PE=1 SV=1	3.32	42.86	2	0.949409	0.832475	4.85	50.65	3	1.2583	0.291509	6.06	53.25	3	1.07886	0.727046	1.09552	0.155117
sp|Q5MPA9|DCLK2_RAT	Serine/threonine-protein kinase DCLK2 OS=Rattus norvegicus GN=Dclk2 PE=1 SV=2	27.38	33.12	14	1.0805	0.552631	24.92	42.37	13	1.04466	0.895849	23.81	41.2	13	1.16148	0.175767	1.09555	0.059844
tr|M0RAK2|M0RAK2_RAT	RCG22622 OS=Rattus norvegicus GN=LOC684270 PE=1 SV=2	4	21.53	2	1.22504	0.739217	4.03	21.53	2	1.05693	0.75811	4.01	21.53	2	1.00503	0.967808	1.09566	0.115009
tr|G3V7Q7|G3V7Q7_RAT	IQ motif containing GTPase activating protein 1 (Predicted), isoform CRA_b OS=Rattus norvegicus GN=Iqgap1 PE=1 SV=1	19.52	26.19	10	1.07311	0.824187	10.89	30.36	6	0.991384	0.976851	18.24	19.86	9	1.22317	0.244705	1.09589	0.117559
sp|P63319|KPCG_RAT	Protein kinase C gamma type OS=Rattus norvegicus GN=Prkcg PE=1 SV=1	8.12	33.43	5	0.874334	0.843795	5.8	25.68	4	1.37218	0.702433	8.63	27.26	4	1.04166	0.980945	1.09606	0.253344
tr|G3V7J1|G3V7J1_RAT	Calsyntenin-3 OS=Rattus norvegicus GN=Clstn3 PE=4 SV=1	5.79	19.12	3	0.981485	0.926237	5.96	17.55	3	1.19296	0	5.73	17.87	3	1.11418	0	1.09621	0.106876
sp|Q99J82|ILK_RAT	Integrin-linked protein kinase OS=Rattus norvegicus GN=Ilk PE=2 SV=1	9.92	36.5	5	1.02437	0.778439	10.28	31.19	5	1.00651	0.901702	12.5	42.26	7	1.2601	0.0271863	1.09699	0.141538
sp|P05943|S10AA_RAT	Protein S100-A10 OS=Rattus norvegicus GN=S100a10 PE=1 SV=2	4.03	45.26	2	0.892021	0.387777	3.65	35.79	2	1.02048	0.837347	4.02	35.79	2	1.37849	0.0735416	1.097	0.252103
sp|Q921A2|MYCT_RAT	Proton myo-inositol cotransporter OS=Rattus norvegicus GN=Slc2a13 PE=1 SV=2	5.67	18.05	3	0.883443	0.504419	6.01	21.98	3	1.32773	0.245662	4.01	14.76	2	1.08071	0.580803	1.09729	0.222607
tr|Q6P7A7|Q6P7A7_RAT	Dolichyl-diphosphooligosaccharide--protein glycosyltransferase subunit 1 OS=Rattus norvegicus GN=Rpn1 PE=1 SV=1	32.38	50.5	16	1.05898	0.512578	32.89	49.17	16	1.03552	0.505183	36.05	50.33	17	1.19742	0.20895	1.09731	0.0874905
tr|D3ZVS2|D3ZVS2_RAT	L-2-hydroxyglutarate dehydrogenase OS=Rattus norvegicus GN=L2hgdh PE=1 SV=1	4.35	32.18	2	1.08832	0.583445	7.31	43.41	4	1.12078	0.780102	6.22	18.36	4	1.08356	0.464343	1.09755	0.0202592
tr|Q3KRE2|Q3KRE2_RAT	Methyltransferase like 7A, isoform CRA_b OS=Rattus norvegicus GN=Mettl7a PE=1 SV=1	8.07	31.15	5	1.10516	0.516871	10.1	36.89	5	1.23751	0.0502571	10.14	39.75	5	0.950247	0.75578	1.09764	0.143779
sp|Q63610|TPM3_RAT	Tropomyosin alpha-3 chain OS=Rattus norvegicus GN=Tpm3 PE=1 SV=2	41.04	79.44	20	0.981231	0.952569	43.27	84.68	23	1.1176	0.068184	42.6	87.9	21	1.1942	0.0240403	1.09768	0.107875
sp|P63036|DNJA1_RAT	DnaJ homolog subfamily A member 1 OS=Rattus norvegicus GN=Dnaja1 PE=1 SV=1	14.33	36.02	7	1.14161	0.832891	14.31	35.52	7	1.0506	0.353996	12.44	29.72	6	1.1009	0.23604	1.0977	0.0455846
tr|F7FM32|F7FM32_RAT	Similar to CG9752-PA OS=Rattus norvegicus GN=RGD1311345 PE=1 SV=1	4.3	46.04	2	0.986453	0.859237	3.31	24.63	2	1.29095	0.414819	4.67	22.58	3	1.01579	0.900002	1.09773	0.167977
sp|P12369|KAP3_RAT	cAMP-dependent protein kinase type II-beta regulatory subunit OS=Rattus norvegicus GN=Prkar2b PE=1 SV=3	20.9	60.34	12	1.02364	0.902558	23.83	53.37	12	1.18597	0.337335	20.11	50.24	11	1.08378	0.710664	1.0978	0.0820685
sp|D3ZDK7|PGP_RAT	Glycerol-3-phosphate phosphatase OS=Rattus norvegicus GN=Pgp PE=1 SV=1	16.47	46.42	8	1.07085	0.558737	13.3	39.56	8	1.19483	0.739393	15.48	41.74	8	1.02815	0.642829	1.09794	0.0865816
tr|A0A0G2JZD1|A0A0G2JZD1_RAT	Serine/threonine-protein phosphatase 2A 56 kDa regulatory subunit OS=Rattus norvegicus GN=Ppp2r5c PE=1 SV=1	8.03	19.64	4	0.885743	0	8.08	19.27	4	1.12734	0	10.1	35.45	5	1.28168	0.246667	1.09825	0.199565
tr|D4AAE9|D4AAE9_RAT	CDGSH iron sulfur domain 2 OS=Rattus norvegicus GN=Cisd2 PE=1 SV=1	2.75	38.52	2	1.09406	0.371187	3.17	49.63	2	1.21254	0.220661	2.69	52.59	2	0.988358	0.952961	1.09832	0.112154
sp|D3ZAF6|ATPK_RAT	ATP synthase subunit f, mitochondrial OS=Rattus norvegicus GN=Atp5j2 PE=1 SV=1	6	29.55	3	1.00329	0.973142	6.97	47.73	4	1.19335	0.10602	8	37.5	4	1.09834	0.335074	1.09833	0.0950345
tr|F1LNG5|F1LNG5_RAT	Phosphatidylinositol 3-kinase regulatory subunit alpha OS=Rattus norvegicus GN=Pik3r1 PE=1 SV=2	6.43	17.82	4	1.30197	0.162584	7.32	24.03	4	0.950261	0.708779	2.66	21.96	2	1.04336	0	1.09853	0.182231
tr|F1M2K6|F1M2K6_RAT	Plakophilin 4 OS=Rattus norvegicus GN=Pkp4 PE=1 SV=2	42.86	41.43	21	1.12781	0.0826903	42.67	44.37	21	1.08879	0.0696136	42.31	48.66	21	1.07944	0.185083	1.09868	0.0256555
sp|Q6PCT3|TPD54_RAT	Tumor protein D54 OS=Rattus norvegicus GN=Tpd52l2 PE=1 SV=1	17.88	73.18	9	0.965965	0.660656	12.76	75.91	6	1.19332	0.606368	17.9	73.64	9	1.13684	0.403603	1.09871	0.118377
tr|G3V7T3|G3V7T3_RAT	Pantothenate kinase 4 OS=Rattus norvegicus GN=Pank4 PE=1 SV=1	20.83	33.76	10	1.31261	0.452374	20.99	38.03	10	0.798002	0.209127	16.95	35.45	7	1.18603	0.562756	1.09888	0.268145
tr|A0A140TAJ3|A0A140TAJ3_RAT	Far upstream element-binding protein 1 OS=Rattus norvegicus GN=Fubp1 PE=1 SV=1	10.74	30.37	5	1.02973	0.88782	11.32	32.55	6	1.20238	0.487062	12.76	33.33	8	1.06482	0.926917	1.09898	0.0912536
sp|Q5U204|LTOR3_RAT	Ragulator complex protein LAMTOR3 OS=Rattus norvegicus GN=Lamtor3 PE=2 SV=1	4	44.35	2	1.16918	0.449719	4	44.35	2	1.02574	0.85299	4	31.45	2	1.10225	0.536694	1.09906	0.0717747
sp|Q5XFX0|TAGL2_RAT	Transgelin-2 OS=Rattus norvegicus GN=Tagln2 PE=1 SV=1	25.38	83.42	12	0.842127	0.18535	24.41	75.88	13	1.04765	0.340888	27.83	78.89	15	1.4083	0.0896991	1.09936	0.286604
sp|Q78P75|DYL2_RAT	Dynein light chain 2, cytoplasmic OS=Rattus norvegicus GN=Dynll2 PE=1 SV=1	11.98	40.45	7	1.05842	0.689517	12.04	40.45	6	1.16241	0.204283	13.13	40.45	7	1.07789	0.451919	1.09957	0.055284
tr|G3V8G2|G3V8G2_RAT	Proteasome (Prosome, macropain) 26S subunit, non-ATPase, 5 (Predicted), isoform CRA_a OS=Rattus norvegicus GN=Psmd5 PE=1 SV=1	25.07	44.64	13	1.13456	0.0501465	20.37	49.21	10	1.08438	0.470952	24.04	42.46	12	1.08041	0.594265	1.09978	0.0301819
sp|Q5I0D5|LHPP_RAT	Phospholysine phosphohistidine inorganic pyrophosphate phosphatase OS=Rattus norvegicus GN=Lhpp PE=2 SV=1	6.22	38.15	3	1.1599	0.283468	10.16	35.56	5	1.04661	0.8549	9.96	48.52	5	1.09298	0.242937	1.09983	0.0569562
tr|G3V6L9|G3V6L9_RAT	Peptidylprolyl isomerase OS=Rattus norvegicus GN=Fkbp3 PE=1 SV=1	17.48	50.89	9	1.10148	0.133169	17.75	51.79	9	1.04886	0.902461	22.71	48.21	12	1.1492	0.0537528	1.09984	0.0501879
sp|P67779|PHB_RAT	Prohibitin OS=Rattus norvegicus GN=Phb PE=1 SV=1	26.24	66.54	13	1.16068	0.108649	25.21	62.5	12	1.11773	0.417236	23.37	63.24	11	1.02226	0.739743	1.10022	0.0708516
tr|M0R6T4|M0R6T4_RAT	MMS19 homolog, cytosolic iron-sulfur assembly component OS=Rattus norvegicus GN=Mms19 PE=1 SV=1	4.28	16.59	2	1.13021	0.272149	8.86	24.44	5	0.977668	0.870196	7.19	21.63	4	1.19366	0.325266	1.10051	0.111015
sp|Q68FQ2|JAM3_RAT	Junctional adhesion molecule C OS=Rattus norvegicus GN=Jam3 PE=1 SV=1	7.94	36.77	4	1.20289	0.592056	7.32	35.48	4	1.02776	0.721992	10.05	38.39	5	1.07123	0.528105	1.10063	0.0911878
tr|D3ZYX8|D3ZYX8_RAT	Cytochrome c oxidase subunit 7A2-like OS=Rattus norvegicus GN=Cox7a2l PE=1 SV=1	4.25	35.83	2	1.09642	0.533877	6.24	46.67	3	1.13386	0.322693	7.84	35.83	5	1.07175	0.453534	1.10068	0.0312734
tr|G3V6V1|G3V6V1_RAT	Aminopeptidase B OS=Rattus norvegicus GN=Rnpep PE=1 SV=1	19.53	32	10	1.22679	0.00127277	18.1	24.62	9	1.05843	0.739983	16.37	27.54	9	1.01692	0.823259	1.10071	0.11114
tr|B1WC33|B1WC33_RAT	CDC42 effector protein (Rho GTPase binding) 4 (Predicted), isoform CRA_a OS=Rattus norvegicus GN=Cdc42ep4 PE=1 SV=1	10.85	47.14	5	1.19295	0.101404	12.06	52.86	6	1.08255	0.77802	12.4	55.71	6	1.02744	0.923038	1.10098	0.0842759
tr|D3ZHC4|D3ZHC4_RAT	Heme binding protein 2 (Predicted), isoform CRA_b OS=Rattus norvegicus GN=Hebp2 PE=1 SV=1	13.91	44.83	8	1.09304	0.155571	16.68	43.35	8	1.12013	0.280332	12.3	39.41	6	1.08989	0.380135	1.10102	0.0166234
tr|D3Z9L0|D3Z9L0_RAT	Acylglycerol kinase OS=Rattus norvegicus GN=Agk PE=1 SV=2	4.26	29.39	2	0.935518	0.922072	2.9	32.45	2	1.20961	0.408113	6.66	28.16	4	1.15821	0.249219	1.10111	0.145692
sp|Q9JJ19|NHRF1_RAT	Na(+)/H(+) exchange regulatory cofactor NHE-RF1 OS=Rattus norvegicus GN=Slc9a3r1 PE=1 SV=3	20.4	63.76	9	0.984487	0.950007	22.16	58.43	11	1.20182	0.396242	24.65	59.83	13	1.11706	0.567937	1.10112	0.109538
tr|G3V8Z9|G3V8Z9_RAT	COP9 (Constitutive photomorphogenic) homolog, subunit 7a (Arabidopsis thaliana) (Predicted) OS=Rattus norvegicus GN=Cops7a PE=1 SV=1	15.71	45.09	9	0.955672	0.604503	15.79	44.73	8	1.15796	0.313055	14.18	43.64	8	1.1901	0.162698	1.10124	0.12709
sp|Q63355|MYO1C_RAT	Unconventional myosin-Ic OS=Rattus norvegicus GN=Myo1c PE=1 SV=2	4.2	20.11	2	0.957655	0.737824	3.4	21.46	2	0.978225	0.910681	8.24	27.68	4	1.36852	0.459963	1.10147	0.231501
sp|Q5M7A4|UBA5_RAT	Ubiquitin-like modifier-activating enzyme 5 OS=Rattus norvegicus GN=Uba5 PE=1 SV=1	9.69	19.35	5	1.16383	0.178727	10.02	26.8	6	1.08685	0.582711	8.27	22.33	5	1.05511	0.544645	1.10193	0.0559089
sp|Q4V8B7|HSDL1_RAT	Inactive hydroxysteroid dehydrogenase-like protein 1 OS=Rattus norvegicus GN=Hsdl1 PE=2 SV=1	6.1	34.85	3	1.00167	0.990664	5.89	24.85	4	1.20899	0.299538	8.81	23.33	6	1.09553	0.19416	1.10206	0.103814
sp|Q32PX2|AIMP2_RAT	Aminoacyl tRNA synthase complex-interacting multifunctional protein 2 OS=Rattus norvegicus GN=Aimp2 PE=2 SV=1	6.09	28.44	3	1.14984	0.63371	6.02	24.38	3	0.975659	0.862699	6	34.38	3	1.1814	0.210481	1.1023	0.110804
tr|A0A0G2JTX2|A0A0G2JTX2_RAT	PRA1 family protein OS=Rattus norvegicus GN=Praf2 PE=1 SV=1	6.77	29.21	4	1.21027	0.093566	7.27	26.97	4	1.03747	0.784641	7.94	26.97	4	1.06051	0.751697	1.10275	0.0938274
sp|O54924|EXOC8_RAT	Exocyst complex component 8 OS=Rattus norvegicus GN=Exoc8 PE=1 SV=1	12.17	28.91	6	1.41057	0.108899	11.61	45.67	6	0.936864	0.562698	11.28	32.68	5	0.960986	0.588634	1.10281	0.266803
tr|A0A0G2K583|A0A0G2K583_RAT	S-methyl-5'-thioadenosine phosphorylase OS=Rattus norvegicus GN=Mtap PE=1 SV=1	11.87	55.12	8	1.13352	0.0587962	14.79	42.76	8	1.02378	0.818851	12.45	49.82	6	1.15247	0.0471108	1.10326	0.0694801
tr|M0RD20|M0RD20_RAT	Calpain small subunit 1 OS=Rattus norvegicus GN=Capns1 PE=1 SV=1	9.38	37.45	5	1.07237	0.392489	13.78	54.73	7	1.01544	0.815375	13.98	43.62	8	1.22259	0.0286855	1.10347	0.107022
sp|Q5RK09|EIF3G_RAT	Eukaryotic translation initiation factor 3 subunit G OS=Rattus norvegicus GN=Eif3g PE=1 SV=1	2.64	30	2	0.976315	0.848975	4.26	36.88	2	1.10123	0.691407	4.19	32.5	2	1.23321	0.3063	1.10359	0.128464
tr|F1LXA0|F1LXA0_RAT	NADH dehydrogenase [ubiquinone] 1 alpha subcomplex subunit 12 OS=Rattus norvegicus GN=Ndufa12 PE=1 SV=2	14.6	68.28	8	1.0513	0.777376	17.52	66.21	8	1.2263	0.00665707	15.36	73.1	8	1.03346	0.743123	1.10369	0.106564
sp|Q9WUC4|ATOX1_RAT	Copper transport protein ATOX1 OS=Rattus norvegicus GN=Atox1 PE=1 SV=1	7.92	63.24	5	1.09683	0.766908	8	58.82	4	1.07641	0.475264	7.32	63.24	4	1.1384	0.580967	1.10388	0.0315887
sp|B1H267|SNX5_RAT	Sorting nexin-5 OS=Rattus norvegicus GN=Snx5 PE=1 SV=1	12.17	35.15	7	0.973845	0.902961	14.63	52.97	7	1.03323	0.887403	14.27	39.11	7	1.30588	0.387423	1.10432	0.177065
sp|P32198|CPT1A_RAT	Carnitine O-palmitoyltransferase 1, liver isoform OS=Rattus norvegicus GN=Cpt1a PE=1 SV=2	8.6	32.47	4	0.879862	0.459663	12.95	32.6	7	1.49844	0.490558	13.63	29.88	8	0.934877	0.432159	1.10439	0.34236
sp|B0BN93|PSD13_RAT	26S proteasome non-ATPase regulatory subunit 13 OS=Rattus norvegicus GN=Psmd13 PE=1 SV=1	21.81	48.94	12	0.97601	0.946367	20.76	50.27	11	1.22889	0.182557	18.9	60.9	9	1.1099	0.204353	1.10493	0.126514
sp|Q9ES53|UFD1_RAT	Ubiquitin recognition factor in ER-associated degradation protein 1 OS=Rattus norvegicus GN=Ufd1 PE=1 SV=1	3.58	24.76	3	1.1355	0.480237	6.71	24.76	4	1.00111	0.994958	3.75	19.54	2	1.17823	0.103189	1.10495	0.0924286
tr|M0RBJ0|M0RBJ0_RAT	Guanine nucleotide-binding protein subunit gamma OS=Rattus norvegicus GN=Gng2 PE=1 SV=2	8	72.73	4	1.02863	0.785333	8	72.73	4	1.09617	0.301007	8	72.73	4	1.19231	0.0930071	1.1057	0.0822571
sp|P61751|ARF4_RAT	ADP-ribosylation factor 4 OS=Rattus norvegicus GN=Arf4 PE=2 SV=2	10.88	52.78	5	1.12395	0	17.62	67.22	9	1.07159	0.566278	16.86	61.11	8	1.12211	0.538492	1.10588	0.0297126
sp|P01830|THY1_RAT	Thy-1 membrane glycoprotein OS=Rattus norvegicus GN=Thy1 PE=1 SV=1	8.16	48.45	5	1.37265	0.0923718	11.15	36.02	7	1.01569	0.956279	10.96	36.02	6	0.929492	0.806863	1.10594	0.234958
tr|Q66HJ7|Q66HJ7_RAT	Receptor-type tyrosine-protein phosphatase OS=Rattus norvegicus GN=Ptpra PE=1 SV=1	13	32.29	7	1.51701	0.196139	21.27	42.46	11	0.89076	0.23596	19.33	29.15	10	0.910612	0.577709	1.10613	0.355973
sp|P62907|RL10A_RAT	60S ribosomal protein L10a OS=Rattus norvegicus GN=Rpl10a PE=1 SV=2	13.12	42.86	7	1.14438	0.0784918	9.9	41.01	6	1.04251	0.653929	10.86	42.4	6	1.13177	0.0594129	1.10622	0.0555324
sp|P04166|CYB5B_RAT	Cytochrome b5 type B OS=Rattus norvegicus GN=Cyb5b PE=1 SV=2	7.89	55.48	4	1.19194	0.165293	8	59.59	4	1.03199	0.747312	8.03	56.16	4	1.09502	0.595304	1.10631	0.080574
tr|Q6P9V6|Q6P9V6_RAT	Proteasome subunit alpha type OS=Rattus norvegicus GN=Psma5 PE=1 SV=1	11.47	27.39	6	0.974749	0.799253	16.53	48.55	8	1.09449	0.481042	16.42	48.55	9	1.24986	0.00484337	1.10637	0.137937
tr|G3V9T7|G3V9T7_RAT	ATPase Asna1 OS=Rattus norvegicus GN=Asna1 PE=1 SV=1	10.12	30.46	5	1.08728	0.233829	17.04	39.08	9	1.06306	0.373968	11.29	28.74	6	1.16878	0.177018	1.10637	0.0553843
sp|Q9Z1E1|FLOT1_RAT	Flotillin-1 OS=Rattus norvegicus GN=Flot1 PE=2 SV=2	18.08	62.62	9	1.14106	0.023186	25.45	59.11	13	1.12847	0.11261	24.02	59.81	13	1.05007	0.644614	1.10653	0.0493042
tr|B2GV99|B2GV99_RAT	Myl6 protein OS=Rattus norvegicus GN=Myl6 PE=2 SV=1	16.46	65.79	8	1.07963	0.583716	16.39	65.79	8	1.08423	0.477085	16.08	61.18	8	1.15652	0.236433	1.10679	0.0431282
sp|Q498U4|SARNP_RAT	SAP domain-containing ribonucleoprotein OS=Rattus norvegicus GN=Sarnp PE=1 SV=3	5.16	37.14	2	1.03597	0.668679	7.23	45.71	4	1.24102	0.230139	6.97	33.33	4	1.0443	0.782435	1.1071	0.116054
sp|O08629|TIF1B_RAT	Transcription intermediary factor 1-beta OS=Rattus norvegicus GN=Trim28 PE=1 SV=2	10.47	17.01	6	1.17242	0.370144	11.87	20.96	7	1.08827	0.378051	16.88	26.11	9	1.0614	0.689181	1.10736	0.057923
tr|B5DFD8|B5DFD8_RAT	SH3 domain-binding glutamic acid-rich-like protein OS=Rattus norvegicus GN=Sh3bgrl PE=1 SV=1	8.22	76.32	4	1.092	0.598129	8.12	74.56	5	1.11652	0.377719	11.09	80.7	6	1.11371	0.859638	1.10741	0.0134172
sp|B2GV54|NCEH1_RAT	Neutral cholesterol ester hydrolase 1 OS=Rattus norvegicus GN=Nceh1 PE=2 SV=1	7.81	24.02	4	1.30055	0.539994	7.23	15.93	4	1.01513	0.847781	6.57	35.05	3	1.00775	0.940577	1.10781	0.166956
sp|P15178|SYDC_RAT	Aspartate--tRNA ligase, cytoplasmic OS=Rattus norvegicus GN=Dars PE=1 SV=1	37.16	58.68	19	1.07188	0.177343	33.99	66.27	18	1.05018	0.546487	34.69	69.46	16	1.20206	0.11843	1.10804	0.0821416
tr|D3Z9K4|D3Z9K4_RAT	Pleckstrin homology domain-containing O2 OS=Rattus norvegicus GN=Plekho2 PE=1 SV=2	4.01	31.78	2	0.96229	0	3.76	23.89	2	0.955086	0	6.57	26.11	3	1.40702	0.201593	1.10813	0.258873
tr|A0A0G2JUG7|A0A0G2JUG7_RAT	IQ motif and Sec7 domain 1 OS=Rattus norvegicus GN=Iqsec1 PE=1 SV=1	17.61	32.12	9	1.07343	0.629586	19.66	33.58	10	1.1707	0.0830934	14.71	34.93	7	1.08107	0.800973	1.1084	0.0540887
tr|A0A0G2JYW3|A0A0G2JYW3_RAT	Clathrin light chain OS=Rattus norvegicus GN=Clta PE=1 SV=1	11.68	33.9	6	0.922503	0.445659	9.68	29.24	7	1.17925	0.146649	8.09	31.36	4	1.22434	0.233277	1.1087	0.162817
tr|A0A0H2UHM0|A0A0H2UHM0_RAT	Vacuolar protein sorting-associated protein 28 homolog OS=Rattus norvegicus GN=Vps28 PE=1 SV=1	7.05	32.58	4	1.0801	0.720215	6	30.77	3	1.10163	0.659028	10	46.15	5	1.14568	0.169567	1.10914	0.0334283
[truncated: 445 more rows]
